# Supplementary material for: Identification of circRNA-associated ceRNA networks using longissimus thoracis of pigs of different breeds and growth stages
Source: BMC Genomics. 2022 Apr 11;23:294. doi: 10.1186/s12864-022-08515-7 (PMC9004053; doi:10.1186/s12864-022-08515-7)
Supplement: Supplementary file 10 — Additional file 10. 12864_2022_8515_MOESM10_ESM.xlsx. [file 12864_2022_8515_MOESM10_ESM.xlsx]

## Sheet: A(CIRCexplorer2)
Prediction of circRNA candidates from rRNA-depleted libraries by CIRCexplorer2
Chrom	Start	End	Strand	Number of exons	Type of circular RNA#	Hosting isoform	Index of exon or intron	Left intron/Right intron
chr1	253253	257333	-	2	circRNA	ENSSSCT00000026580.1	3,2	chr1:242015-253253|chr1:257333-268292
chr1	2734733	2739505	-	7	circRNA	ENSSSCT00000004443.2	29,28,27,26,25,24,23	chr1:2727533-2734733|chr1:2739505-2750751
chr1	2734733	2770778	-	18	circRNA	ENSSSCT00000004443.2	29,28,27,26,25,24,23,22,21,20,19,18,17,16,15,14,13,12	chr1:2727533-2734733|chr1:2770778-2775860
chr1	2750751	2770778	-	11	circRNA	ENSSSCT00000004443.2	22,21,20,19,18,17,16,15,14,13,12	chr1:2739505-2750751|chr1:2770778-2775860
chr1	2756892	2761837	-	5	circRNA	ENSSSCT00000004443.2	20,19,18,17,16	chr1:2753425-2756892|chr1:2761837-2764695
chr1	2775860	2790071	-	6	circRNA	ENSSSCT00000004443.2	11,10,9,8,7,6	chr1:2770778-2775860|chr1:2790071-2805467
chr1	2783965	2785567	-	2	circRNA	ENSSSCT00000004443.2	8,7	chr1:2781086-2783965|chr1:2785567-2789913
chr1	2783965	2790071	-	3	circRNA	ENSSSCT00000004443.2	8,7,6	chr1:2781086-2783965|chr1:2790071-2805467
chr1	2783965	2805628	-	4	circRNA	ENSSSCT00000004443.2	8,7,6,5	chr1:2781086-2783965|chr1:2805628-2808656
chr1	2783965	2814551	-	7	circRNA	ENSSSCT00000004443.2	8,7,6,5,4,3,2	chr1:2781086-2783965|chr1:2814551-2815302
chr1	2789913	2814551	-	5	circRNA	ENSSSCT00000004443.2	6,5,4,3,2	chr1:2785567-2789913|chr1:2814551-2815302
chr1	2805467	2814551	-	4	circRNA	ENSSSCT00000004443.2	5,4,3,2	chr1:2790071-2805467|chr1:2814551-2815302
chr1	2808656	2814551	-	3	circRNA	ENSSSCT00000004443.2	4,3,2	chr1:2805628-2808656|chr1:2814551-2815302
chr1	3580936	3605794	+	6	circRNA	ENSSSCT00000004447.2	3,4,5,6,7,8	chr1:3575685-3580936|chr1:3605794-3608860
chr1	3610550	3648716	+	8	circRNA	ENSSSCT00000004447.2	10,11,12,13,14,15,16,17	chr1:3608931-3610550|chr1:3648716-3651991
chr1	3625427	3637802	+	4	circRNA	ENSSSCT00000004447.2	11,12,13,14	chr1:3610639-3625427|chr1:3637802-3645658
chr1	3631438	3654211	+	8	circRNA	ENSSSCT00000004447.2	12,13,14,15,16,17,18,19	chr1:3625492-3631438|chr1:3654211-3657513
chr1	3636066	3648716	+	5	circRNA	ENSSSCT00000004447.2	13,14,15,16,17	chr1:3631541-3636066|chr1:3648716-3651991
chr1	3637676	3646543	+	3	circRNA	ENSSSCT00000004447.2	14,15,16	chr1:3636197-3637676|chr1:3646543-3648554
chr1	3637676	3648716	+	4	circRNA	ENSSSCT00000004447.2	14,15,16,17	chr1:3636197-3637676|chr1:3648716-3651991
chr1	4648181	4658081	+	5	circRNA	ENSSSCT00000004453.2	3,4,5,6,7	chr1:4636526-4648181|chr1:4658081-4665261
chr1	4653395	4658081	+	4	circRNA	ENSSSCT00000004453.2	4,5,6,7	chr1:4648322-4653395|chr1:4658081-4665261
chr1	4653395	4685558	+	8	circRNA	ENSSSCT00000004453.2	4,5,6,7,8,9,10,11	chr1:4648322-4653395|chr1:4685558-4687897
chr1	4668015	4685558	+	3	circRNA	ENSSSCT00000004453.2	9,10,11	chr1:4665404-4668015|chr1:4685558-4687897
chr1	6389140	6418134	-	2	circRNA	ENSSSCT00000004455.2	5,4	chr1:6387776-6389140|chr1:6418134-6464868
chr1	6417990	6418134	-	1	circRNA	ENSSSCT00000004455.2	4	chr1:6389228-6417990|chr1:6418134-6464868
chr1	6417990	6464985	-	2	circRNA	ENSSSCT00000004455.2	4,3	chr1:6389228-6417990|chr1:6464985-6486183
chr1	6464868	6464985	-	1	circRNA	ENSSSCT00000004455.2	3	chr1:6418134-6464868|chr1:6464985-6486183
chr1	7351417	7650069	+	4	circRNA	ENSSSCT00000004459.2	2,3,4,5	chr1:7197216-7351417|chr1:7650069-7812335
chr1	8314883	8318075	+	3	circRNA	ENSSSCT00000036162.1	3,4,5	chr1:8313224-8314883|chr1:8318075-8318965
chr1	8795510	8799832	-	3	circRNA	ENSSSCT00000004467.2	10,9,8	chr1:8790177-8795510|chr1:8799832-8808425
chr1	8795510	8844270	-	9	circRNA	ENSSSCT00000004467.2	10,9,8,7,6,5,4,3,2	chr1:8790177-8795510|chr1:8844270-8884942
chr1	8798656	8844270	-	8	circRNA	ENSSSCT00000004467.2	9,8,7,6,5,4,3,2	chr1:8795610-8798656|chr1:8844270-8884942
chr1	8808425	8844270	-	6	circRNA	ENSSSCT00000004467.2	7,6,5,4,3,2	chr1:8799832-8808425|chr1:8844270-8884942
chr1	8838521	8844270	-	4	circRNA	ENSSSCT00000004467.2	5,4,3,2	chr1:8808857-8838521|chr1:8844270-8884942
chr1	9185005	9188014	-	2	circRNA	ENSSSCT00000004472.3	37,36	chr1:9183101-9185005|chr1:9188014-9189906
chr1	9199130	9214761	-	16	circRNA	ENSSSCT00000004472.3	29,28,27,26,25,24,23,22,21,20,19,18,17,16,15,14	chr1:9194886-9199130|chr1:9214761-9219241
chr1	9199130	9223297	-	19	circRNA	ENSSSCT00000004472.3	29,28,27,26,25,24,23,22,21,20,19,18,17,16,15,14,13,12,11	chr1:9194886-9199130|chr1:9223297-9228583
chr1	9204928	9223297	-	12	circRNA	ENSSSCT00000004472.3	22,21,20,19,18,17,16,15,14,13,12,11	chr1:9202744-9204928|chr1:9223297-9228583
chr1	9240838	9251868	-	3	circRNA	ENSSSCT00000004472.3	4,3,2	chr1:9236087-9240838|chr1:9251868-9271091
chr1	9392358	9397924	+	5	circRNA	ENSSSCT00000004476.2	5,6,7,8,9	chr1:9391970-9392358|chr1:9397924-9398223
chr1	9393569	9397339	+	2	circRNA	ENSSSCT00000004476.2	7,8	chr1:9392946-9393569|chr1:9397339-9397800
chr1	9393569	9398731	+	5	circRNA	ENSSSCT00000004476.2	7,8,9,10,11	chr1:9392946-9393569|chr1:9398731-9399370
chr1	9393696	9397163	+	1	ciRNA	ENSSSCT00000004476.2	7	chr1:9393696-9397163
chr1	9397163	9398731	+	4	circRNA	ENSSSCT00000004476.2	8,9,10,11	chr1:9393696-9397163|chr1:9398731-9399370
chr1	9397800	9398731	+	3	circRNA	ENSSSCT00000004476.2	9,10,11	chr1:9397339-9397800|chr1:9398731-9399370
chr1	9427898	9440203	-	5	circRNA	ENSSSCT00000004478.2	7,6,5,4,3	chr1:9422243-9427898|chr1:9440203-9447172
chr1	9432505	9437448	-	3	circRNA	ENSSSCT00000004478.2	6,5,4	chr1:9428077-9432505|chr1:9437448-9440165
chr1	9432505	9440203	-	4	circRNA	ENSSSCT00000004478.2	6,5,4,3	chr1:9428077-9432505|chr1:9440203-9447172
chr1	9842038	9861085	-	7	circRNA	ENSSSCT00000004480.2	22,21,20,19,18,17,16	chr1:9839667-9842038|chr1:9861085-9863088
chr1	10450260	10466915	-	3	circRNA	ENSSSCT00000004486.2	7,6,5	chr1:10440553-10450260|chr1:10466915-10469017
chr1	10921742	10936300	+	7	circRNA	ENSSSCT00000013465.2	2,3,4,5,6,7,8	chr1:10907559-10921742|chr1:10936300-10946974
chr1	10921742	10947088	+	8	circRNA	ENSSSCT00000013465.2	2,3,4,5,6,7,8,9	chr1:10907559-10921742|chr1:10947088-10949365
chr1	10924458	10930546	+	3	circRNA	ENSSSCT00000013465.2	3,4,5	chr1:10921840-10924458|chr1:10930546-10932138
chr1	10932138	10947088	+	4	circRNA	ENSSSCT00000013465.2	6,7,8,9	chr1:10930546-10932138|chr1:10947088-10949365
chr1	11007612	11012314	-	4	circRNA	ENSSSCT00000025119.1	15,14,13,12	chr1:11005535-11007612|chr1:11012314-11013126
chr1	11257425	11292201	-	12	circRNA	ENSSSCT00000030285.1	15,14,13,12,11,10,9,8,7,6,5,4	chr1:11255347-11257425|chr1:11292201-11314740
chr1	11260375	11275460	-	6	circRNA	ENSSSCT00000030285.1	14,13,12,11,10,9	chr1:11257540-11260375|chr1:11275460-11280890
chr1	11262086	11271143	-	3	circRNA	ENSSSCT00000030285.1	13,12,11	chr1:11260465-11262086|chr1:11271143-11272803
chr1	11267870	11292201	-	9	circRNA	ENSSSCT00000030285.1	12,11,10,9,8,7,6,5,4	chr1:11262163-11267870|chr1:11292201-11314740
chr1	11280890	11292201	-	5	circRNA	ENSSSCT00000030285.1	8,7,6,5,4	chr1:11275460-11280890|chr1:11292201-11314740
chr1	11290048	11292201	-	2	circRNA	ENSSSCT00000030285.1	5,4	chr1:11284220-11290048|chr1:11292201-11314740
chr1	11314740	11316288	-	2	circRNA	ENSSSCT00000030285.1	3,2	chr1:11292201-11314740|chr1:11316288-11318942
chr1	11314740	11319029	-	3	circRNA	ENSSSCT00000030285.1	3,2,1	chr1:11292201-11314740|None
chr1	13625974	13628887	-	4	circRNA	ENSSSCT00000027128.1	19,18,17,16	chr1:13625630-13625974|chr1:13628887-13630779
chr1	13627235	13628887	-	3	circRNA	ENSSSCT00000027128.1	18,17,16	chr1:13626062-13627235|chr1:13628887-13630779
chr1	13627235	13639656	-	7	circRNA	ENSSSCT00000027128.1	18,17,16,15,14,13,12	chr1:13626062-13627235|chr1:13639656-13640495
chr1	13630779	13632958	-	2	circRNA	ENSSSCT00000027128.1	15,14	chr1:13628887-13630779|chr1:13632958-13637432
chr1	13690313	13697228	-	5	circRNA	ENSSSCT00000027128.1	8,7,6,5,4	chr1:13668300-13690313|chr1:13697228-13708646
chr1	13691493	13694870	-	3	circRNA	ENSSSCT00000027128.1	7,6,5	chr1:13690577-13691493|chr1:13694870-13697066
chr1	14083796	14085261	-	1	circRNA	ENSSSCT00000004499.2	23	chr1:14017155-14083796|chr1:14085261-14086329
chr1	14083796	14086548	-	2	circRNA	ENSSSCT00000004499.2	23,22	chr1:14017155-14083796|chr1:14086548-14089045
chr1	14083796	14096371	-	7	circRNA	ENSSSCT00000004499.2	23,22,21,20,19,18,17	chr1:14017155-14083796|chr1:14096371-14099142
chr1	14083796	14107726	-	12	circRNA	ENSSSCT00000004499.2	23,22,21,20,19,18,17,16,15,14,13,12	chr1:14017155-14083796|chr1:14107726-14110631
chr1	14083796	14118412	-	17	circRNA	ENSSSCT00000004499.2	23,22,21,20,19,18,17,16,15,14,13,12,11,10,9,8,7	chr1:14017155-14083796|chr1:14118412-14125828
chr1	14083796	14130086	-	19	circRNA	ENSSSCT00000004499.2	23,22,21,20,19,18,17,16,15,14,13,12,11,10,9,8,7,6,5	chr1:14017155-14083796|chr1:14130086-14165630
chr1	14089045	14103753	-	9	circRNA	ENSSSCT00000004499.2	21,20,19,18,17,16,15,14,13	chr1:14086548-14089045|chr1:14103753-14107608
chr1	14092851	14103753	-	7	circRNA	ENSSSCT00000004499.2	19,18,17,16,15,14,13	chr1:14091136-14092851|chr1:14103753-14107608
chr1	14094863	14103753	-	6	circRNA	ENSSSCT00000004499.2	18,17,16,15,14,13	chr1:14092985-14094863|chr1:14103753-14107608
chr1	14094863	14112114	-	9	circRNA	ENSSSCT00000004499.2	18,17,16,15,14,13,12,11,10	chr1:14092985-14094863|chr1:14112114-14114963
chr1	14096257	14103753	-	5	circRNA	ENSSSCT00000004499.2	17,16,15,14,13	chr1:14095020-14096257|chr1:14103753-14107608
chr1	14096257	14107726	-	6	circRNA	ENSSSCT00000004499.2	17,16,15,14,13,12	chr1:14095020-14096257|chr1:14107726-14110631
chr1	14096257	14110711	-	7	circRNA	ENSSSCT00000004499.2	17,16,15,14,13,12,11	chr1:14095020-14096257|chr1:14110711-14111937
chr1	14096257	14118412	-	11	circRNA	ENSSSCT00000004499.2	17,16,15,14,13,12,11,10,9,8,7	chr1:14095020-14096257|chr1:14118412-14125828
chr1	14099142	14103118	-	3	circRNA	ENSSSCT00000004499.2	16,15,14	chr1:14096371-14099142|chr1:14103118-14103621
chr1	14099142	14103753	-	4	circRNA	ENSSSCT00000004499.2	16,15,14,13	chr1:14096371-14099142|chr1:14103753-14107608
chr1	14099142	14107726	-	5	circRNA	ENSSSCT00000004499.2	16,15,14,13,12	chr1:14096371-14099142|chr1:14107726-14110631
chr1	14099142	14116614	-	9	circRNA	ENSSSCT00000004499.2	16,15,14,13,12,11,10,9,8	chr1:14096371-14099142|chr1:14116614-14118250
chr1	14101395	14103753	-	3	circRNA	ENSSSCT00000004499.2	15,14,13	chr1:14099243-14101395|chr1:14103753-14107608
chr1	14114963	14125873	-	4	circRNA	ENSSSCT00000004499.2	9,8,7,6	chr1:14112114-14114963|chr1:14125873-14130002
chr1	14166716	14166746	-	1	ciRNA	ENSSSCT00000004499.2	1	chr1:14166501-14166746
chr1	14415408	14428257	+	4	circRNA	ENSSSCT00000004500.2	3,4,5,6	chr1:14407550-14415408|chr1:14428257-14430630
chr1	14415408	14430690	+	5	circRNA	ENSSSCT00000004500.2	3,4,5,6,7	chr1:14407550-14415408|chr1:14430690-14436000
chr1	14415408	14442646	+	8	circRNA	ENSSSCT00000004500.2	3,4,5,6,7,8,9,10	chr1:14407550-14415408|chr1:14442646-14446464
chr1	14428137	14436069	+	3	circRNA	ENSSSCT00000004500.2	6,7,8	chr1:14424505-14428137|chr1:14436069-14436579
chr1	14430630	14442646	+	4	circRNA	ENSSSCT00000004500.2	7,8,9,10	chr1:14428257-14430630|chr1:14442646-14446464
chr1	14436000	14442646	+	3	circRNA	ENSSSCT00000004500.2	8,9,10	chr1:14430690-14436000|chr1:14442646-14446464
chr1	14446464	14447253	+	2	circRNA	ENSSSCT00000004500.2	11,12	chr1:14442646-14446464|chr1:14447253-14449948
chr1	15699845	15707125	+	5	circRNA	ENSSSCT00000004505.2	2,3,4,5,6	chr1:15696915-15699845|chr1:15707125-15708053
chr1	16080528	16089003	-	10	circRNA	ENSSSCT00000004510.2	55,54,53,52,51,50,49,48,47,46	chr1:16078120-16080528|chr1:16089003-16090048
chr1	16080528	16183454	-	52	circRNA	ENSSSCT00000004510.2	55,54,53,52,51,50,49,48,47,46,45,44,43,42,41,40,39,38,37,36,35,34,33,32,31,30,29,28,27,26,25,24,23,22,21,20,19,18,17,16,15,14,13,12,11,10,9,8,7,6,5,4	chr1:16078120-16080528|chr1:16183454-16190741
chr1	16119377	16127640	-	5	circRNA	ENSSSCT00000004510.2	30,29,28,27,26	chr1:16116681-16119377|chr1:16127640-16129444
chr1	16160392	16165251	-	3	circRNA	ENSSSCT00000004510.2	10,9,8	chr1:16153838-16160392|chr1:16165251-16173434
chr1	16327907	16329883	+	3	circRNA	ENSSSCT00000031249.1	8,9,10	chr1:16324784-16327907|chr1:16329883-16332460
chr1	16327907	16332954	+	5	circRNA	ENSSSCT00000031249.1	8,9,10,11,12	chr1:16324784-16327907|chr1:16332954-16333437
chr1	16327907	16340328	+	9	circRNA	ENSSSCT00000031249.1	8,9,10,11,12,13,14,15,16	chr1:16324784-16327907|chr1:16340328-16348339
chr1	16327907	16348877	+	11	circRNA	ENSSSCT00000031249.1	8,9,10,11,12,13,14,15,16,17,18	chr1:16324784-16327907|chr1:16348877-16356084
chr1	16327907	16357950	+	13	circRNA	ENSSSCT00000031249.1	8,9,10,11,12,13,14,15,16,17,18,19,20	chr1:16324784-16327907|chr1:16357950-16360634
chr1	16333437	16334830	+	2	circRNA	ENSSSCT00000031249.1	13,14	chr1:16332954-16333437|chr1:16334830-16338910
chr1	16338910	16340328	+	2	circRNA	ENSSSCT00000031249.1	15,16	chr1:16334830-16338910|chr1:16340328-16348339
chr1	16348339	16348877	+	2	circRNA	ENSSSCT00000031249.1	17,18	chr1:16340328-16348339|chr1:16348877-16356084
chr1	16348339	16357950	+	4	circRNA	ENSSSCT00000031249.1	17,18,19,20	chr1:16340328-16348339|chr1:16357950-16360634
chr1	16348339	16369834	+	13	circRNA	ENSSSCT00000031249.1	17,18,19,20,21,22,23,24,25,26,27,28,29	chr1:16340328-16348339|chr1:16369834-16375758
chr1	16356084	16357950	+	2	circRNA	ENSSSCT00000031249.1	19,20	chr1:16348877-16356084|chr1:16357950-16360634
chr1	16368653	16381029	+	7	circRNA	ENSSSCT00000031249.1	28,29,30,31,32,33,34	chr1:16368547-16368653|chr1:16381029-16385818
chr1	16375911	16381029	+	4	circRNA	ENSSSCT00000031249.1	31,32,33,34	chr1:16375759-16375911|chr1:16381029-16385818
chr1	16379738	16381029	+	3	circRNA	ENSSSCT00000031249.1	32,33,34	chr1:16376043-16379738|chr1:16381029-16385818
chr1	16393881	16395904	+	2	circRNA	ENSSSCT00000004511.2	2,3	chr1:16390764-16393881|chr1:16395904-16396789
chr1	16393881	16400038	+	6	circRNA	ENSSSCT00000004511.2	2,3,4,5,6,7	chr1:16390764-16393881|chr1:16400038-16401105
chr1	16396789	16400038	+	4	circRNA	ENSSSCT00000004511.2	4,5,6,7	chr1:16395904-16396789|chr1:16400038-16401105
chr1	16396789	16402143	+	6	circRNA	ENSSSCT00000004511.2	4,5,6,7,8,9	chr1:16395904-16396789|chr1:16402143-16409467
chr1	16415159	16421729	+	7	circRNA	ENSSSCT00000004511.2	12,13,14,15,16,17,18	chr1:16412381-16415159|chr1:16421729-16424315
chr1	16415159	16446726	+	13	circRNA	ENSSSCT00000004511.2	12,13,14,15,16,17,18,19,20,21,22,23,24	chr1:16412381-16415159|chr1:16446726-16450342
chr1	16415159	16463270	+	15	circRNA	ENSSSCT00000004511.2	12,13,14,15,16,17,18,19,20,21,22,23,24,25,26	chr1:16412381-16415159|chr1:16463270-16472493
chr1	16415159	16473752	+	17	circRNA	ENSSSCT00000004511.2	12,13,14,15,16,17,18,19,20,21,22,23,24,25,26,27,28	chr1:16412381-16415159|chr1:16473752-16478397
chr1	16415159	16481887	+	22	circRNA	ENSSSCT00000004511.2	12,13,14,15,16,17,18,19,20,21,22,23,24,25,26,27,28,29,30,31,32,33	chr1:16412381-16415159|chr1:16481887-16483414
chr1	16415159	16494951	+	31	circRNA	ENSSSCT00000004511.2	12,13,14,15,16,17,18,19,20,21,22,23,24,25,26,27,28,29,30,31,32,33,34,35,36,37,38,39,40,41,42	chr1:16412381-16415159|chr1:16494951-16495997
chr1	16424315	16433998	+	4	circRNA	ENSSSCT00000004511.2	19,20,21,22	chr1:16421729-16424315|chr1:16433998-16438240
chr1	16433872	16438396	+	2	circRNA	ENSSSCT00000004511.2	22,23	chr1:16429911-16433872|chr1:16438396-16446567
chr1	16463107	16473752	+	3	circRNA	ENSSSCT00000004511.2	26,27,28	chr1:16450509-16463107|chr1:16473752-16478397
chr1	16472493	16473752	+	2	circRNA	ENSSSCT00000004511.2	27,28	chr1:16463270-16472493|chr1:16473752-16478397
chr1	16492759	16494951	+	2	circRNA	ENSSSCT00000004511.2	41,42	chr1:16490988-16492759|chr1:16494951-16495997
chr1	17075532	17075769	-	1	circRNA	ENSSSCT00000004518.2	10	chr1:17073321-17075532|chr1:17075769-17087946
chr1	17075532	17091938	-	3	circRNA	ENSSSCT00000004518.2	10,9,8	chr1:17073321-17075532|chr1:17091938-17097740
chr1	17075532	17134778	-	9	circRNA	ENSSSCT00000004518.2	10,9,8,7,6,5,4,3,2	chr1:17073321-17075532|chr1:17134778-17135231
chr1	17087946	17091938	-	2	circRNA	ENSSSCT00000004518.2	9,8	chr1:17075769-17087946|chr1:17091938-17097740
chr1	17087946	17123292	-	5	circRNA	ENSSSCT00000004518.2	9,8,7,6,5	chr1:17075769-17087946|chr1:17123292-17126128
chr1	17087946	17134778	-	8	circRNA	ENSSSCT00000004518.2	9,8,7,6,5,4,3,2	chr1:17075769-17087946|chr1:17134778-17135231
chr1	17224291	17233606	+	2	circRNA	ENSSSCT00000004520.2	2,3	chr1:17207131-17224291|chr1:17233606-17236720
chr1	17233497	17240990	+	4	circRNA	ENSSSCT00000004520.2	3,4,5,6	chr1:17224782-17233497|chr1:17240990-17243546
chr1	17233497	17243653	+	5	circRNA	ENSSSCT00000004520.2	3,4,5,6,7	chr1:17224782-17233497|chr1:17243653-17245045
chr1	17233497	17248742	+	8	circRNA	ENSSSCT00000004520.2	3,4,5,6,7,8,9,10	chr1:17224782-17233497|chr1:17248742-17261732
chr1	17236720	17240990	+	3	circRNA	ENSSSCT00000004520.2	4,5,6	chr1:17233606-17236720|chr1:17240990-17243546
chr1	17236720	17243653	+	4	circRNA	ENSSSCT00000004520.2	4,5,6,7	chr1:17233606-17236720|chr1:17243653-17245045
chr1	17236720	17248742	+	7	circRNA	ENSSSCT00000004520.2	4,5,6,7,8,9,10	chr1:17233606-17236720|chr1:17248742-17261732
chr1	17236720	17261849	+	8	circRNA	ENSSSCT00000004520.2	4,5,6,7,8,9,10,11	chr1:17233606-17236720|chr1:17261849-17262480
chr1	17240889	17248742	+	5	circRNA	ENSSSCT00000004520.2	6,7,8,9,10	chr1:17239162-17240889|chr1:17248742-17261732
chr1	17240889	17261849	+	6	circRNA	ENSSSCT00000004520.2	6,7,8,9,10,11	chr1:17239162-17240889|chr1:17261849-17262480
chr1	17243546	17248742	+	4	circRNA	ENSSSCT00000004520.2	7,8,9,10	chr1:17240990-17243546|chr1:17248742-17261732
chr1	17243546	17261849	+	5	circRNA	ENSSSCT00000004520.2	7,8,9,10,11	chr1:17240990-17243546|chr1:17261849-17262480
chr1	18017972	18019733	-	2	circRNA	ENSSSCT00000004526.2	3,2	chr1:17997182-18017972|chr1:18019733-18078749
chr1	18440911	18442264	+	2	circRNA	ENSSSCT00000004538.2	1,2	None|chr1:18442264-18451547
chr1	18440911	18451652	+	3	circRNA	ENSSSCT00000004538.2	1,2,3	None|chr1:18451652-18455230
chr1	18440911	18455351	+	4	circRNA	ENSSSCT00000004538.2	1,2,3,4	None|chr1:18455351-18457219
chr1	18440911	18457305	+	5	circRNA	ENSSSCT00000004538.2	1,2,3,4,5	None|chr1:18457305-18462001
chr1	18451547	18457305	+	3	circRNA	ENSSSCT00000004538.2	3,4,5	chr1:18442264-18451547|chr1:18457305-18462001
chr1	18496820	18497027	-	1	circRNA	ENSSSCT00000004536.2	6	chr1:18482676-18496820|chr1:18497027-18498457
chr1	18581035	18587490	+	4	circRNA	ENSSSCT00000004540.2	4,5,6,7	chr1:18579125-18581035|chr1:18587490-18590893
chr1	18608283	18615988	+	2	circRNA	ENSSSCT00000004541.2	2,3	chr1:18600996-18608283|chr1:18615988-18625347
chr1	18608283	18629947	+	4	circRNA	ENSSSCT00000004541.2	2,3,4,5	chr1:18600996-18608283|chr1:18629947-18633146
chr1	18661829	18663491	-	2	circRNA	ENSSSCT00000004539.2	3,2	chr1:18660919-18661829|chr1:18663491-18665513
chr1	18676192	18683344	+	5	circRNA	ENSSSCT00000024741.1	3,4,5,6,7	chr1:18675643-18676192|chr1:18683344-18720444
chr1	18676192	18725069	+	7	circRNA	ENSSSCT00000024741.1	3,4,5,6,7,8,9	chr1:18675643-18676192|chr1:18725069-18728621
chr1	18679111	18720511	+	4	circRNA	ENSSSCT00000024741.1	5,6,7,8	chr1:18677089-18679111|chr1:18720511-18724957
chr1	18679111	18725069	+	5	circRNA	ENSSSCT00000024741.1	5,6,7,8,9	chr1:18677089-18679111|chr1:18725069-18728621
chr1	18698061	18701550	+	3	circRNA	ENSSSCT00000004543.2	2,3,4	chr1:18690778-18698061|chr1:18701550-18702669
chr1	18724957	18734033	+	3	circRNA	ENSSSCT00000024741.1	9,10,11	chr1:18720511-18724957|chr1:18734033-18762995
chr1	18858275	18860238	-	3	circRNA	ENSSSCT00000004545.2	6,5,4	chr1:18854361-18858275|chr1:18860238-18877992
chr1	18877992	18885264	-	2	circRNA	ENSSSCT00000034966.1	3,2	chr1:18860238-18877992|chr1:18885264-18903641
chr1	20604441	20605734	-	2	circRNA	ENSSSCT00000004548.2	16,15	chr1:20599501-20604441|chr1:20605734-20606575
chr1	21161650	21174015	-	6	circRNA	ENSSSCT00000004553.2	25,24,23,22,21,20	chr1:21156392-21161650|chr1:21174015-21178822
chr1	21161650	21193751	-	13	circRNA	ENSSSCT00000004553.2	25,24,23,22,21,20,19,18,17,16,15,14,13	chr1:21156392-21161650|chr1:21193751-21200689
chr1	21200689	21222409	-	6	circRNA	ENSSSCT00000004553.2	12,11,10,9,8,7	chr1:21193751-21200689|chr1:21222409-21231836
chr1	21865209	21869835	+	3	circRNA	ENSSSCT00000004555.2	2,3,4	chr1:21856797-21865209|chr1:21869835-21874054
chr1	21865209	21879171	+	8	circRNA	ENSSSCT00000004555.2	2,3,4,5,6,7,8,9	chr1:21856797-21865209|chr1:21879171-21880746
chr1	21865209	21887813	+	13	circRNA	ENSSSCT00000004555.2	2,3,4,5,6,7,8,9,10,11,12,13,14	chr1:21856797-21865209|chr1:21887813-21896146
chr1	21867311	21869835	+	2	circRNA	ENSSSCT00000004555.2	3,4	chr1:21865876-21867311|chr1:21869835-21874054
chr1	21874054	21880998	+	6	circRNA	ENSSSCT00000004555.2	5,6,7,8,9,10	chr1:21869835-21874054|chr1:21880998-21881811
chr1	21874054	21887813	+	10	circRNA	ENSSSCT00000004555.2	5,6,7,8,9,10,11,12,13,14	chr1:21869835-21874054|chr1:21887813-21896146
chr1	21874054	21916637	+	21	circRNA	ENSSSCT00000004555.2	5,6,7,8,9,10,11,12,13,14,15,16,17,18,19,20,21,22,23,24,25	chr1:21869835-21874054|chr1:21916637-21930593
chr1	21874776	21908413	+	14	circRNA	ENSSSCT00000004555.2	6,7,8,9,10,11,12,13,14,15,16,17,18,19	chr1:21874133-21874776|chr1:21908413-21908713
chr1	21880746	21916637	+	16	circRNA	ENSSSCT00000004555.2	10,11,12,13,14,15,16,17,18,19,20,21,22,23,24,25	chr1:21879171-21880746|chr1:21916637-21930593
chr1	21885695	21916637	+	14	circRNA	ENSSSCT00000004555.2	12,13,14,15,16,17,18,19,20,21,22,23,24,25	chr1:21881890-21885695|chr1:21916637-21930593
chr1	21887691	21897987	+	3	circRNA	ENSSSCT00000004555.2	14,15,16	chr1:21886247-21887691|chr1:21897987-21903533
chr1	21887691	21903641	+	4	circRNA	ENSSSCT00000004555.2	14,15,16,17	chr1:21886247-21887691|chr1:21903641-21904604
chr1	21887691	21930686	+	13	circRNA	ENSSSCT00000004555.2	14,15,16,17,18,19,20,21,22,23,24,25,26	chr1:21886247-21887691|chr1:21930686-21932220
chr1	21896146	21897987	+	2	circRNA	ENSSSCT00000004555.2	15,16	chr1:21887813-21896146|chr1:21897987-21903533
chr1	21896146	21913495	+	9	circRNA	ENSSSCT00000004555.2	15,16,17,18,19,20,21,22,23	chr1:21887813-21896146|chr1:21913495-21914826
chr1	21908239	21909914	+	3	circRNA	ENSSSCT00000004555.2	19,20,21	chr1:21904747-21908239|chr1:21909914-21911872
chr1	21908713	21933228	+	9	circRNA	ENSSSCT00000004555.2	20,21,22,23,24,25,26,27,28	chr1:21908413-21908713|chr1:21933228-21935416
chr1	21932220	21933228	+	2	circRNA	ENSSSCT00000004555.2	27,28	chr1:21930686-21932220|chr1:21933228-21935416
chr1	22000199	22000275	+	1	ciRNA	ENSSSCT00000004556.2	1	chr1:22000199-22008330
chr1	22008330	22010368	+	1	circRNA	ENSSSCT00000004556.2	2	chr1:22000199-22008330|chr1:22010368-22014257
chr1	22086460	22126571	+	2	circRNA	ENSSSCT00000004557.2	2,3	chr1:22050900-22086460|chr1:22126571-22134468
chr1	23010568	23013030	-	2	circRNA	ENSSSCT00000004558.2	19,18	chr1:23003728-23010568|chr1:23013030-23015793
chr1	23010568	23016578	-	4	circRNA	ENSSSCT00000004558.2	19,18,17,16	chr1:23003728-23010568|chr1:23016578-23026020
chr1	23012921	23016578	-	3	circRNA	ENSSSCT00000004558.2	18,17,16	chr1:23010661-23012921|chr1:23016578-23026020
chr1	23015793	23016578	-	2	circRNA	ENSSSCT00000004558.2	17,16	chr1:23013030-23015793|chr1:23016578-23026020
chr1	23026020	23034674	-	4	circRNA	ENSSSCT00000004558.2	15,14,13,12	chr1:23016578-23026020|chr1:23034674-23046964
chr1	23027992	23051903	-	6	circRNA	ENSSSCT00000004558.2	14,13,12,11,10,9	chr1:23026086-23027992|chr1:23051903-23056617
chr1	23069996	23094568	-	4	circRNA	ENSSSCT00000004558.2	6,5,4,3	chr1:23062905-23069996|chr1:23094568-23097597
chr1	23262197	23263386	-	2	circRNA	ENSSSCT00000030687.1	3,2	chr1:23253158-23262197|chr1:23263386-23266188
chr1	24139041	24139381	+	1	circRNA	ENSSSCT00000004568.2	3	chr1:24135555-24139041|chr1:24139381-24141207
chr1	24139041	24141862	+	3	circRNA	ENSSSCT00000004568.2	3,4,5	chr1:24135555-24139041|chr1:24141862-24147501
chr1	24157617	24168231	-	7	circRNA	ENSSSCT00000004569.2	11,10,9,8,7,6,5	chr1:24154986-24157617|chr1:24168231-24169817
chr1	24157617	24174643	-	9	circRNA	ENSSSCT00000004569.2	11,10,9,8,7,6,5,4,3	chr1:24154986-24157617|chr1:24174643-24180245
chr1	24157617	24180377	-	10	circRNA	ENSSSCT00000004569.2	11,10,9,8,7,6,5,4,3,2	chr1:24154986-24157617|chr1:24180377-24188440
chr1	24162296	24168231	-	6	circRNA	ENSSSCT00000004569.2	10,9,8,7,6,5	chr1:24157714-24162296|chr1:24168231-24169817
chr1	24162296	24169861	-	7	circRNA	ENSSSCT00000004569.2	10,9,8,7,6,5,4	chr1:24157714-24162296|chr1:24169861-24174561
chr1	24164527	24168231	-	5	circRNA	ENSSSCT00000004569.2	9,8,7,6,5	chr1:24162419-24164527|chr1:24168231-24169817
chr1	24166855	24168231	-	4	circRNA	ENSSSCT00000004569.2	8,7,6,5	chr1:24164598-24166855|chr1:24168231-24169817
chr1	25357025	25360852	+	2	circRNA	ENSSSCT00000004574.2	3,4	chr1:25298841-25357025|chr1:25360852-25370108
chr1	25360228	25360852	+	1	circRNA	ENSSSCT00000004574.2	4	chr1:25357367-25360228|chr1:25360852-25370108
chr1	25380819	25396454	+	10	circRNA	ENSSSCT00000004574.2	8,9,10,11,12,13,14,15,16,17	chr1:25378864-25380819|chr1:25396454-25398344
chr1	25385757	25394185	+	7	circRNA	ENSSSCT00000004574.2	10,11,12,13,14,15,16	chr1:25381899-25385757|chr1:25394185-25396408
chr1	25396408	25404924	+	4	circRNA	ENSSSCT00000004574.2	17,18,19,20	chr1:25394185-25396408|chr1:25404924-25406327
chr1	25518796	25530074	-	2	circRNA	ENSSSCT00000004575.2	5,4	chr1:25510602-25518796|chr1:25530074-25536400
chr1	25536400	25537258	-	2	circRNA	ENSSSCT00000004575.2	3,2	chr1:25530074-25536400|chr1:25537258-25540223
chr1	28380598	28417673	+	6	circRNA	ENSSSCT00000004578.2	2,3,4,5,6,7	chr1:28371336-28380598|chr1:28417673-28421024
chr1	28658852	28664480	+	7	circRNA	ENSSSCT00000004582.3	2,3,4,5,6,7,8	chr1:28642196-28658852|chr1:28664480-28675225
chr1	28658852	28675347	+	8	circRNA	ENSSSCT00000004582.3	2,3,4,5,6,7,8,9	chr1:28642196-28658852|chr1:28675347-28678989
chr1	28660705	28664480	+	6	circRNA	ENSSSCT00000004582.3	3,4,5,6,7,8	chr1:28658976-28660705|chr1:28664480-28675225
chr1	28662024	28664480	+	4	circRNA	ENSSSCT00000004582.3	5,6,7,8	chr1:28661172-28662024|chr1:28664480-28675225
chr1	28662024	28675347	+	5	circRNA	ENSSSCT00000004582.3	5,6,7,8,9	chr1:28661172-28662024|chr1:28675347-28678989
chr1	28693777	28695193	+	2	circRNA	ENSSSCT00000004582.3	16,17	chr1:28691165-28693777|chr1:28695193-28697040
chr1	29833561	29837812	-	2	circRNA	ENSSSCT00000034426.1	3,2	chr1:29832945-29833561|chr1:29837812-29841380
chr1	30714005	30766617	-	4	circRNA	ENSSSCT00000004599.2	6,5,4,3	chr1:30712215-30714005|chr1:30766617-30767770
chr1	30727132	30767828	-	3	circRNA	ENSSSCT00000004599.2	4,3,2	chr1:30726732-30727132|chr1:30767828-30769395
chr1	30766466	30767828	-	2	circRNA	ENSSSCT00000004599.2	3,2	chr1:30727210-30766466|chr1:30767828-30769395
chr1	30877429	30937560	+	10	circRNA	ENSSSCT00000025418.1	2,3,4,5,6,7,8,9,10,11	chr1:30747740-30877429|chr1:30937560-30942163
chr1	30878515	30883016	+	3	circRNA	ENSSSCT00000025418.1	3,4,5	chr1:30877623-30878515|chr1:30883016-30904464
chr1	30904464	30921771	+	3	circRNA	ENSSSCT00000025418.1	6,7,8	chr1:30883016-30904464|chr1:30921771-30928227
chr1	30921617	30928335	+	2	circRNA	ENSSSCT00000025418.1	8,9	chr1:30919143-30921617|chr1:30928335-30934934
chr1	30921617	30942245	+	5	circRNA	ENSSSCT00000025418.1	8,9,10,11,12	chr1:30919143-30921617|chr1:30942245-30955893
chr1	30934934	30942245	+	3	circRNA	ENSSSCT00000025418.1	10,11,12	chr1:30928335-30934934|chr1:30942245-30955893
chr1	30934934	30965623	+	7	circRNA	ENSSSCT00000025418.1	10,11,12,13,14,15,16	chr1:30928335-30934934|chr1:30965623-30973161
chr1	30973161	30976747	+	3	circRNA	ENSSSCT00000025418.1	17,18,19	chr1:30965623-30973161|chr1:30976747-30979936
chr1	30979936	30990296	+	5	circRNA	ENSSSCT00000025418.1	20,21,22,23,24	chr1:30976747-30979936|chr1:30990296-31001654
chr1	30986497	31001898	+	3	circRNA	ENSSSCT00000025418.1	23,24,25	chr1:30980372-30986497|chr1:31001898-31007010
chr1	31387490	31394302	+	4	circRNA	ENSSSCT00000004604.2	2,3,4,5	chr1:31384993-31387490|chr1:31394302-31412607
chr1	31387490	31412699	+	5	circRNA	ENSSSCT00000004604.2	2,3,4,5,6	chr1:31384993-31387490|chr1:31412699-31419389
chr1	31387490	31428147	+	8	circRNA	ENSSSCT00000004604.2	2,3,4,5,6,7,8,9	chr1:31384993-31387490|chr1:31428147-31432471
chr1	31389961	31394302	+	3	circRNA	ENSSSCT00000004604.2	3,4,5	chr1:31387554-31389961|chr1:31394302-31412607
chr1	31389961	31412699	+	4	circRNA	ENSSSCT00000004604.2	3,4,5,6	chr1:31387554-31389961|chr1:31412699-31419389
chr1	31389961	31428147	+	7	circRNA	ENSSSCT00000004604.2	3,4,5,6,7,8,9	chr1:31387554-31389961|chr1:31428147-31432471
chr1	31412607	31421810	+	3	circRNA	ENSSSCT00000004604.2	6,7,8	chr1:31394302-31412607|chr1:31421810-31428066
chr1	31419389	31428147	+	3	circRNA	ENSSSCT00000004604.2	7,8,9	chr1:31412699-31419389|chr1:31428147-31432471
chr1	31500054	31502732	-	3	circRNA	ENSSSCT00000004602.2	9,8,7	chr1:31494054-31500054|chr1:31502732-31505056
chr1	31501247	31502732	-	2	circRNA	ENSSSCT00000004602.2	8,7	chr1:31500201-31501247|chr1:31502732-31505056
chr1	32054761	32072573	+	6	circRNA	ENSSSCT00000004605.2	3,4,5,6,7,8	chr1:32049639-32054761|chr1:32072573-32080656
chr1	32054761	32104524	+	15	circRNA	ENSSSCT00000004605.2	3,4,5,6,7,8,9,10,11,12,13,14,15,16,17	chr1:32049639-32054761|chr1:32104524-32107746
chr1	32080656	32107865	+	10	circRNA	ENSSSCT00000004605.2	9,10,11,12,13,14,15,16,17,18	chr1:32072573-32080656|chr1:32107865-32110230
chr1	32080656	32169111	+	16	circRNA	ENSSSCT00000004605.2	9,10,11,12,13,14,15,16,17,18,19,20,21,22,23,24	chr1:32072573-32080656|chr1:32169111-32204638
chr1	32089245	32169111	+	13	circRNA	ENSSSCT00000004605.2	12,13,14,15,16,17,18,19,20,21,22,23,24	chr1:32085670-32089245|chr1:32169111-32204638
chr1	32091198	32093129	+	2	circRNA	ENSSSCT00000004605.2	13,14	chr1:32089431-32091198|chr1:32093129-32097052
chr1	32111951	32169111	+	5	circRNA	ENSSSCT00000004605.2	20,21,22,23,24	chr1:32110361-32111951|chr1:32169111-32204638
chr1	32124161	32169111	+	4	circRNA	ENSSSCT00000004605.2	21,22,23,24	chr1:32112092-32124161|chr1:32169111-32204638
chr1	32129557	32169111	+	3	circRNA	ENSSSCT00000004605.2	22,23,24	chr1:32124358-32129557|chr1:32169111-32204638
chr1	32473136	32519201	+	6	circRNA	ENSSSCT00000004608.2	4,5,6,7,8,9	chr1:32469575-32473136|chr1:32519201-32524814
chr1	32473331	32474795	+	1	ciRNA	ENSSSCT00000004608.2	4	chr1:32473331-32509603
chr1	32509603	32519201	+	5	circRNA	ENSSSCT00000004608.2	5,6,7,8,9	chr1:32473331-32509603|chr1:32519201-32524814
chr1	32509603	32527213	+	9	circRNA	ENSSSCT00000004608.2	5,6,7,8,9,10,11,12,13	chr1:32473331-32509603|chr1:32527213-32529919
chr1	32509603	32533892	+	12	circRNA	ENSSSCT00000004608.2	5,6,7,8,9,10,11,12,13,14,15,16	chr1:32473331-32509603|chr1:32533892-32537799
chr1	32524814	32533892	+	7	circRNA	ENSSSCT00000004608.2	10,11,12,13,14,15,16	chr1:32519201-32524814|chr1:32533892-32537799
chr1	32524814	32540017	+	9	circRNA	ENSSSCT00000004608.2	10,11,12,13,14,15,16,17,18	chr1:32519201-32524814|chr1:32540017-32540958
chr1	32529919	32533892	+	3	circRNA	ENSSSCT00000004608.2	14,15,16	chr1:32527213-32529919|chr1:32533892-32537799
chr1	32533264	32537900	+	3	circRNA	ENSSSCT00000004608.2	15,16,17	chr1:32530024-32533264|chr1:32537900-32539872
chr1	33358249	33359590	+	1	circRNA	ENSSSCT00000004611.2	2	chr1:33338402-33358249|chr1:33359590-33381375
chr1	33407639	33415246	-	5	circRNA	ENSSSCT00000030224.1	6,5,4,3,2	chr1:33404706-33407639|chr1:33415246-33439105
chr1	33788384	33827194	-	8	circRNA	ENSSSCT00000028886.1	11,10,9,8,7,6,5,4	chr1:33781676-33788384|chr1:33827194-33831489
chr1	33806784	33831582	-	8	circRNA	ENSSSCT00000028886.1	10,9,8,7,6,5,4,3	chr1:33788474-33806784|chr1:33831582-33840291
chr1	33825453	33827194	-	3	circRNA	ENSSSCT00000028886.1	6,5,4	chr1:33823313-33825453|chr1:33827194-33831489
chr1	34454538	34470277	+	10	circRNA	ENSSSCT00000004617.2	2,3,4,5,6,7,8,9,10,11	chr1:34453217-34454538|chr1:34470277-34471000
chr1	34740830	34742924	+	2	circRNA	ENSSSCT00000004629.2	3,4	chr1:34713269-34740830|chr1:34742924-34746423
chr1	34824221	34826380	+	3	circRNA	ENSSSCT00000004630.2	2,3,4	chr1:34803315-34824221|chr1:34826380-34863946
chr1	35246073	35263537	-	13	circRNA	ENSSSCT00000004632.2	24,23,22,21,20,19,18,17,16,15,14,13,12	chr1:35244314-35246073|chr1:35263537-35265595
chr1	35263405	35269936	-	5	circRNA	ENSSSCT00000004632.2	12,11,10,9,8	chr1:35261554-35263405|chr1:35269936-35270630
chr1	35479000	35482118	-	5	circRNA	ENSSSCT00000004637.2	19,18,17,16,15	chr1:35477115-35479000|chr1:35482118-35483890
chr1	35479000	35489992	-	10	circRNA	ENSSSCT00000004637.2	19,18,17,16,15,14,13,12,11,10	chr1:35477115-35479000|chr1:35489992-35491105
chr1	35479000	35499044	-	13	circRNA	ENSSSCT00000004637.2	19,18,17,16,15,14,13,12,11,10,9,8,7	chr1:35477115-35479000|chr1:35499044-35500559
chr1	35488668	35489992	-	2	circRNA	ENSSSCT00000004637.2	11,10	chr1:35486301-35488668|chr1:35489992-35491105
chr1	35488668	35500672	-	6	circRNA	ENSSSCT00000004637.2	11,10,9,8,7,6	chr1:35486301-35488668|chr1:35500672-35502216
chr1	35489846	35493291	-	3	circRNA	ENSSSCT00000004637.2	10,9,8	chr1:35488914-35489846|chr1:35493291-35498948
chr1	35489846	35500672	-	5	circRNA	ENSSSCT00000004637.2	10,9,8,7,6	chr1:35488914-35489846|chr1:35500672-35502216
chr1	35562961	35566080	+	5	circRNA	ENSSSCT00000032585.1	4,5,6,7,8	chr1:35561189-35562961|chr1:35566080-35567965
chr1	35565280	35566080	+	2	circRNA	ENSSSCT00000032585.1	7,8	chr1:35564051-35565280|chr1:35566080-35567965
chr1	36687164	36694300	-	3	circRNA	ENSSSCT00000004644.2	14,13,12	chr1:36677318-36687164|chr1:36694300-36705594
chr1	36705594	36708619	-	2	circRNA	ENSSSCT00000004644.2	11,10	chr1:36694300-36705594|chr1:36708619-36710431
chr1	36705594	36710567	-	3	circRNA	ENSSSCT00000004644.2	11,10,9	chr1:36694300-36705594|chr1:36710567-36712747
chr1	36705594	36712852	-	4	circRNA	ENSSSCT00000004644.2	11,10,9,8	chr1:36694300-36705594|chr1:36712852-36715009
chr1	36715009	36718719	-	3	circRNA	ENSSSCT00000004644.2	7,6,5	chr1:36712852-36715009|chr1:36718719-36720331
chr1	37126557	37143270	+	4	circRNA	ENSSSCT00000004646.2	4,5,6,7	chr1:37121590-37126557|chr1:37143270-37147243
chr1	37134828	37137964	+	2	circRNA	ENSSSCT00000004646.2	5,6	chr1:37126736-37134828|chr1:37137964-37143192
chr1	37134828	37143270	+	3	circRNA	ENSSSCT00000004646.2	5,6,7	chr1:37126736-37134828|chr1:37143270-37147243
chr1	37334852	37497184	-	3	circRNA	ENSSSCT00000004648.2	7,6,5	chr1:37327586-37334852|chr1:37497184-37500539
chr1	37334852	37503843	-	6	circRNA	ENSSSCT00000004648.2	7,6,5,4,3,2	chr1:37327586-37334852|chr1:37503843-37509688
chr1	37497059	37503843	-	4	circRNA	ENSSSCT00000004648.2	5,4,3,2	chr1:37335834-37497059|chr1:37503843-37509688
chr1	38402898	38559582	+	4	circRNA	ENSSSCT00000004650.2	2,3,4,5	chr1:38213206-38402898|chr1:38559582-38580893
chr1	38479515	38479787	+	1	circRNA	ENSSSCT00000004650.2	3	chr1:38403021-38479515|chr1:38479787-38556809
chr1	38556809	38611471	+	4	circRNA	ENSSSCT00000004650.2	4,5,6,7	chr1:38479787-38556809|chr1:38611471-38708635
chr1	38708635	38795389	+	8	circRNA	ENSSSCT00000004650.2	8,9,10,11,12,13,14,15	chr1:38611471-38708635|chr1:38795389-38797456
chr1	38719884	38795389	+	6	circRNA	ENSSSCT00000004650.2	10,11,12,13,14,15	chr1:38715784-38719884|chr1:38795389-38797456
chr1	38722172	38722298	+	1	ciRNA	ENSSSCT00000004650.2	11	chr1:38722172-38732050
chr1	38795228	38804840	+	5	circRNA	ENSSSCT00000004650.2	15,16,17,18,19	chr1:38787289-38795228|chr1:38804840-38805035
chr1	38808883	38824238	+	4	circRNA	ENSSSCT00000004650.2	22,23,24,25	chr1:38807590-38808883|chr1:38824238-38825226
chr1	38824102	38826411	+	3	circRNA	ENSSSCT00000004650.2	25,26,27	chr1:38821966-38824102|chr1:38826411-38829295
chr1	39462459	39463789	+	1	circRNA	ENSSSCT00000004658.2	5	chr1:39460145-39462459|chr1:39463789-39466620
chr1	40737382	40745673	-	3	circRNA	ENSSSCT00000004665.2	12,11,10	chr1:40714113-40737382|chr1:40745673-40746970
chr1	40737382	40747135	-	4	circRNA	ENSSSCT00000004665.2	12,11,10,9	chr1:40714113-40737382|chr1:40747135-40749925
chr1	40737382	40750006	-	5	circRNA	ENSSSCT00000004665.2	12,11,10,9,8	chr1:40714113-40737382|chr1:40750006-40758731
chr1	40737382	40764451	-	10	circRNA	ENSSSCT00000004665.2	12,11,10,9,8,7,6,5,4,3	chr1:40714113-40737382|chr1:40764451-40767490
chr1	40737382	40767556	-	11	circRNA	ENSSSCT00000004665.2	12,11,10,9,8,7,6,5,4,3,2	chr1:40714113-40737382|chr1:40767556-40774619
chr1	40745354	40760525	-	8	circRNA	ENSSSCT00000004665.2	11,10,9,8,7,6,5,4	chr1:40737503-40745354|chr1:40760525-40764377
chr1	40745354	40767556	-	10	circRNA	ENSSSCT00000004665.2	11,10,9,8,7,6,5,4,3,2	chr1:40737503-40745354|chr1:40767556-40774619
chr1	40749925	40767556	-	7	circRNA	ENSSSCT00000004665.2	8,7,6,5,4,3,2	chr1:40747135-40749925|chr1:40767556-40774619
chr1	40758731	40760525	-	4	circRNA	ENSSSCT00000004665.2	7,6,5,4	chr1:40750006-40758731|chr1:40760525-40764377
chr1	40758731	40767556	-	6	circRNA	ENSSSCT00000004665.2	7,6,5,4,3,2	chr1:40750006-40758731|chr1:40767556-40774619
chr1	40759886	40760355	-	2	circRNA	ENSSSCT00000004665.2	6,5	chr1:40758888-40759886|chr1:40760355-40760443
chr1	40759886	40760525	-	3	circRNA	ENSSSCT00000004665.2	6,5,4	chr1:40758888-40759886|chr1:40760525-40764377
chr1	40759886	40767556	-	5	circRNA	ENSSSCT00000004665.2	6,5,4,3,2	chr1:40758888-40759886|chr1:40767556-40774619
chr1	40861688	40892122	-	8	circRNA	ENSSSCT00000027938.1	10,9,8,7,6,5,4,3	chr1:40831941-40861688|chr1:40892122-40936825
chr1	40861688	40936935	-	9	circRNA	ENSSSCT00000027938.1	10,9,8,7,6,5,4,3,2	chr1:40831941-40861688|chr1:40936935-40963412
chr1	40891901	40936935	-	2	circRNA	ENSSSCT00000027938.1	3,2	chr1:40876606-40891901|chr1:40936935-40963412
chr1	41713229	41713431	-	1	circRNA	ENSSSCT00000022320.1	3	chr1:41678667-41713229|chr1:41713431-41731104
chr1	44439810	44443134	+	4	circRNA	ENSSSCT00000004682.2	3,4,5,6	chr1:44437862-44439810|chr1:44443134-44445143
chr1	44454220	44469456	-	8	circRNA	ENSSSCT00000004683.2	11,10,9,8,7,6,5,4	chr1:44453525-44454220|chr1:44469456-44471828
chr1	44457511	44469456	-	7	circRNA	ENSSSCT00000004683.2	10,9,8,7,6,5,4	chr1:44454305-44457511|chr1:44469456-44471828
chr1	44462993	44469456	-	5	circRNA	ENSSSCT00000004683.2	8,7,6,5,4	chr1:44462049-44462993|chr1:44469456-44471828
chr1	45632971	45640532	+	2	circRNA	ENSSSCT00000004689.2	2,3	chr1:45615202-45632971|chr1:45640532-45652264
chr1	45632971	45682546	+	14	circRNA	ENSSSCT00000004689.2	2,3,4,5,6,7,8,9,10,11,12,13,14,15	chr1:45615202-45632971|chr1:45682546-45692533
chr1	45652264	45661284	+	7	circRNA	ENSSSCT00000004689.2	4,5,6,7,8,9,10	chr1:45640532-45652264|chr1:45661284-45669932
chr1	45652264	45677973	+	11	circRNA	ENSSSCT00000004689.2	4,5,6,7,8,9,10,11,12,13,14	chr1:45640532-45652264|chr1:45677973-45682418
chr1	45669932	45682546	+	5	circRNA	ENSSSCT00000004689.2	11,12,13,14,15	chr1:45661284-45669932|chr1:45682546-45692533
chr1	45692533	45737883	+	10	circRNA	ENSSSCT00000004689.2	16,17,18,19,20,21,22,23,24,25	chr1:45682546-45692533|chr1:45737883-45756710
chr1	45701229	45706203	+	3	circRNA	ENSSSCT00000004689.2	18,19,20	chr1:45693407-45701229|chr1:45706203-45713268
chr1	45701229	45721056	+	5	circRNA	ENSSSCT00000004689.2	18,19,20,21,22	chr1:45693407-45701229|chr1:45721056-45734304
chr1	45701229	45734427	+	6	circRNA	ENSSSCT00000004689.2	18,19,20,21,22,23	chr1:45693407-45701229|chr1:45734427-45735707
chr1	45701229	45737883	+	8	circRNA	ENSSSCT00000004689.2	18,19,20,21,22,23,24,25	chr1:45693407-45701229|chr1:45737883-45756710
chr1	45701229	45764360	+	10	circRNA	ENSSSCT00000004689.2	18,19,20,21,22,23,24,25,26,27	chr1:45693407-45701229|chr1:45764360-45776651
chr1	45720967	45764360	+	6	circRNA	ENSSSCT00000004689.2	22,23,24,25,26,27	chr1:45713385-45720967|chr1:45764360-45776651
chr1	45734304	45764360	+	5	circRNA	ENSSSCT00000004689.2	23,24,25,26,27	chr1:45721056-45734304|chr1:45764360-45776651
chr1	45734304	45805070	+	10	circRNA	ENSSSCT00000004689.2	23,24,25,26,27,28,29,30,31,32	chr1:45721056-45734304|chr1:45805070-45818853
chr1	45756710	45764360	+	2	circRNA	ENSSSCT00000004689.2	26,27	chr1:45737883-45756710|chr1:45764360-45776651
chr1	45756710	45787500	+	6	circRNA	ENSSSCT00000004689.2	26,27,28,29,30,31	chr1:45737883-45756710|chr1:45787500-45804881
chr1	45756710	45805070	+	7	circRNA	ENSSSCT00000004689.2	26,27,28,29,30,31,32	chr1:45737883-45756710|chr1:45805070-45818853
chr1	45778464	45805070	+	4	circRNA	ENSSSCT00000004689.2	29,30,31,32	chr1:45776721-45778464|chr1:45805070-45818853
chr1	47936666	47952313	+	3	circRNA	ENSSSCT00000004691.1	2,3,4	chr1:47895608-47936666|chr1:47952313-47989399
chr1	48407028	48409471	+	3	circRNA	ENSSSCT00000004693.2	8,9,10	chr1:48380785-48407028|chr1:48409471-48410334
chr1	48636667	48636829	+	1	circRNA	ENSSSCT00000004696.2	2	chr1:48622412-48636667|chr1:48636829-48670438
chr1	48636667	48671226	+	2	circRNA	ENSSSCT00000004696.2	2,3	chr1:48622412-48636667|chr1:48671226-48710256
chr1	48636667	48710378	+	3	circRNA	ENSSSCT00000004696.2	2,3,4	chr1:48622412-48636667|chr1:48710378-48735902
chr1	48636667	48763509	+	9	circRNA	ENSSSCT00000004696.2	2,3,4,5,6,7,8,9,10	chr1:48622412-48636667|chr1:48763509-48780088
chr1	48670438	48671226	+	1	circRNA	ENSSSCT00000004696.2	3	chr1:48636829-48670438|chr1:48671226-48710256
chr1	48670438	48710378	+	2	circRNA	ENSSSCT00000004696.2	3,4	chr1:48636829-48670438|chr1:48710378-48735902
chr1	48670438	48736020	+	3	circRNA	ENSSSCT00000004696.2	3,4,5	chr1:48636829-48670438|chr1:48736020-48754988
chr1	48670438	48758440	+	6	circRNA	ENSSSCT00000004696.2	3,4,5,6,7,8	chr1:48636829-48670438|chr1:48758440-48762819
chr1	48670438	48763509	+	8	circRNA	ENSSSCT00000004696.2	3,4,5,6,7,8,9,10	chr1:48636829-48670438|chr1:48763509-48780088
chr1	48710256	48736020	+	2	circRNA	ENSSSCT00000004696.2	4,5	chr1:48671226-48710256|chr1:48736020-48754988
chr1	48735902	48736020	+	1	circRNA	ENSSSCT00000004696.2	5	chr1:48710378-48735902|chr1:48736020-48754988
chr1	48754988	48758440	+	3	circRNA	ENSSSCT00000004696.2	6,7,8	chr1:48736020-48754988|chr1:48758440-48762819
chr1	48754988	48763509	+	5	circRNA	ENSSSCT00000004696.2	6,7,8,9,10	chr1:48736020-48754988|chr1:48763509-48780088
chr1	48755862	48782867	+	6	circRNA	ENSSSCT00000004696.2	7,8,9,10,11,12	chr1:48755168-48755862|chr1:48782867-48787890
chr1	49510302	49517462	-	3	circRNA	ENSSSCT00000030561.1	4,3,2	chr1:49505914-49510302|chr1:49517462-49532196
chr1	49615190	49624011	+	5	circRNA	ENSSSCT00000004701.1	4,5,6,7,8	chr1:49611264-49615190|chr1:49624011-49627368
chr1	49650664	49657101	-	8	circRNA	ENSSSCT00000004702.2	13,12,11,10,9,8,7,6	chr1:49647946-49650664|chr1:49657101-49661732
chr1	49650664	49661866	-	9	circRNA	ENSSSCT00000004702.2	13,12,11,10,9,8,7,6,5	chr1:49647946-49650664|chr1:49661866-49668383
chr1	49652177	49654308	-	3	circRNA	ENSSSCT00000004702.2	11,10,9	chr1:49651663-49652177|chr1:49654308-49654831
chr1	49652177	49654956	-	4	circRNA	ENSSSCT00000004702.2	11,10,9,8	chr1:49651663-49652177|chr1:49654956-49655860
chr1	49655860	49668456	-	4	circRNA	ENSSSCT00000004702.2	7,6,5,4	chr1:49654956-49655860|chr1:49668456-49672698
chr1	49655860	49672750	-	5	circRNA	ENSSSCT00000004702.2	7,6,5,4,3	chr1:49654956-49655860|chr1:49672750-49674470
chr1	49668383	49672750	-	2	circRNA	ENSSSCT00000004702.2	4,3	chr1:49661866-49668383|chr1:49672750-49674470
chr1	49668383	49674605	-	3	circRNA	ENSSSCT00000004702.2	4,3,2	chr1:49661866-49668383|chr1:49674605-49694848
chr1	49807726	49823047	+	9	circRNA	ENSSSCT00000029401.1	19,20,21,22,23,24,25,26,27	chr1:49797048-49807726|chr1:49823047-49827141
chr1	49844429	49846091	+	3	circRNA	ENSSSCT00000029401.1	48,49,50	chr1:49838321-49844429|chr1:49846091-49853538
chr1	49844429	49853702	+	4	circRNA	ENSSSCT00000029401.1	48,49,50,51	chr1:49838321-49844429|chr1:49853702-49862414
chr1	50184401	50201733	-	8	circRNA	ENSSSCT00000004711.2	12,11,10,9,8,7,6,5	chr1:50177467-50184401|chr1:50201733-50203481
chr1	50516495	50517149	+	2	circRNA	ENSSSCT00000026265.1	2,3	chr1:50512002-50516495|chr1:50517149-50518667
chr1	50516495	50518742	+	3	circRNA	ENSSSCT00000026265.1	2,3,4	chr1:50512002-50516495|chr1:50518742-50519652
chr1	50672462	50694938	-	3	circRNA	ENSSSCT00000025934.1	11,10,9	chr1:50665753-50672462|chr1:50694938-50704458
chr1	50692802	50704642	-	3	circRNA	ENSSSCT00000025934.1	10,9,8	chr1:50672552-50692802|chr1:50704642-50709252
chr1	50692802	50713213	-	7	circRNA	ENSSSCT00000025934.1	10,9,8,7,6,5,4	chr1:50672552-50692802|chr1:50713213-50717508
chr1	56058917	56063865	-	5	circRNA	ENSSSCT00000004721.2	14,13,12,11,10	chr1:56035473-56058917|chr1:56063865-56080745
chr1	56080745	56109914	-	6	circRNA	ENSSSCT00000004721.2	9,8,7,6,5,4	chr1:56063865-56080745|chr1:56109914-56127659
chr1	56083814	56106529	-	4	circRNA	ENSSSCT00000004721.2	8,7,6,5	chr1:56080898-56083814|chr1:56106529-56109816
chr1	56093262	56106529	-	3	circRNA	ENSSSCT00000004721.2	7,6,5	chr1:56083940-56093262|chr1:56106529-56109816
chr1	56096586	56109914	-	3	circRNA	ENSSSCT00000004721.2	6,5,4	chr1:56093336-56096586|chr1:56109914-56127659
chr1	56229525	56230776	+	2	circRNA	ENSSSCT00000004722.2	3,4	chr1:56216931-56229525|chr1:56230776-56259722
chr1	56259722	56294385	+	6	circRNA	ENSSSCT00000004722.2	5,6,7,8,9,10	chr1:56230776-56259722|chr1:56294385-56296800
chr1	56259722	56296845	+	7	circRNA	ENSSSCT00000004722.2	5,6,7,8,9,10,11	chr1:56230776-56259722|chr1:56296845-56341279
chr1	56341279	56351411	+	2	circRNA	ENSSSCT00000004722.2	12,13	chr1:56296845-56341279|chr1:56351411-56353577
chr1	56518395	56521779	+	3	circRNA	ENSSSCT00000004722.2	42,43,44	chr1:56513591-56518395|chr1:56521779-56526874
chr1	56934207	56984951	+	12	circRNA	ENSSSCT00000004725.2	6,7,8,9,10,11,12,13,14,15,16,17	chr1:56924468-56934207|chr1:56984951-56987834
chr1	57105761	57195641	+	3	circRNA	ENSSSCT00000004726.2	2,3,4	chr1:57055622-57105761|chr1:57195641-57204223
chr1	57105761	57208795	+	5	circRNA	ENSSSCT00000004726.2	2,3,4,5,6	chr1:57055622-57105761|chr1:57208795-57251693
chr1	57185077	57208795	+	4	circRNA	ENSSSCT00000004726.2	3,4,5,6	chr1:57105895-57185077|chr1:57208795-57251693
chr1	57204223	57251784	+	3	circRNA	ENSSSCT00000004726.2	5,6,7	chr1:57195641-57204223|chr1:57251784-57270987
chr1	58460994	58484561	+	4	circRNA	ENSSSCT00000004730.2	33,34,35,36	chr1:58443630-58460994|chr1:58484561-58490810
chr1	58460994	58517592	+	6	circRNA	ENSSSCT00000004730.2	33,34,35,36,37,38	chr1:58443630-58460994|chr1:58517592-58573661
chr1	58484448	58490977	+	2	circRNA	ENSSSCT00000004730.2	36,37	chr1:58468361-58484448|chr1:58490977-58517350
chr1	58484448	58517592	+	3	circRNA	ENSSSCT00000004730.2	36,37,38	chr1:58468361-58484448|chr1:58517592-58573661
chr1	59138032	59169921	+	3	circRNA	ENSSSCT00000026479.1	2,3,4	chr1:59101967-59138032|chr1:59169921-59185944
chr1	59138032	59190326	+	5	circRNA	ENSSSCT00000026479.1	2,3,4,5,6	chr1:59101967-59138032|chr1:59190326-59201351
chr1	59246998	59267596	+	3	circRNA	ENSSSCT00000026479.1	10,11,12	chr1:59214774-59246998|chr1:59267596-59272754
chr1	59694552	59744379	-	18	circRNA	ENSSSCT00000004742.2	24,23,22,21,20,19,18,17,16,15,14,13,12,11,10,9,8,7	chr1:59692127-59694552|chr1:59744379-59750077
chr1	59698189	59718542	-	10	circRNA	ENSSSCT00000004742.2	23,22,21,20,19,18,17,16,15,14	chr1:59694694-59698189|chr1:59718542-59726630
chr1	59703027	59707659	-	3	circRNA	ENSSSCT00000004742.2	22,21,20	chr1:59698842-59703027|chr1:59707659-59709106
chr1	59707495	59713073	-	3	circRNA	ENSSSCT00000004742.2	20,19,18	chr1:59706038-59707495|chr1:59713073-59715025
chr1	59707495	59715138	-	4	circRNA	ENSSSCT00000004742.2	20,19,18,17	chr1:59706038-59707495|chr1:59715138-59717239
chr1	59712967	59718542	-	5	circRNA	ENSSSCT00000004742.2	18,17,16,15,14	chr1:59709233-59712967|chr1:59718542-59726630
chr1	59726630	59744379	-	7	circRNA	ENSSSCT00000004742.2	13,12,11,10,9,8,7	chr1:59718542-59726630|chr1:59744379-59750077
chr1	59728050	59728333	-	1	circRNA	ENSSSCT00000004742.2	12	chr1:59726892-59728050|chr1:59728333-59732284
chr1	59728050	59744379	-	6	circRNA	ENSSSCT00000004742.2	12,11,10,9,8,7	chr1:59726892-59728050|chr1:59744379-59750077
chr1	59739761	59744379	-	3	circRNA	ENSSSCT00000004742.2	9,8,7	chr1:59733229-59739761|chr1:59744379-59750077
chr1	59739761	59752746	-	6	circRNA	ENSSSCT00000004742.2	9,8,7,6,5,4	chr1:59733229-59739761|chr1:59752746-59755640
chr1	59739761	59755752	-	7	circRNA	ENSSSCT00000004742.2	9,8,7,6,5,4,3	chr1:59733229-59739761|chr1:59755752-59756581
chr1	59744263	59752746	-	4	circRNA	ENSSSCT00000004742.2	7,6,5,4	chr1:59742442-59744263|chr1:59752746-59755640
chr1	59750077	59752746	-	3	circRNA	ENSSSCT00000004742.2	6,5,4	chr1:59744379-59750077|chr1:59752746-59755640
chr1	59750077	59755752	-	4	circRNA	ENSSSCT00000004742.2	6,5,4,3	chr1:59744379-59750077|chr1:59755752-59756581
chr1	60892774	60900407	-	7	circRNA	ENSSSCT00000004747.2	28,27,26,25,24,23,22	chr1:60891652-60892774|chr1:60900407-60903251
chr1	60892774	60905657	-	9	circRNA	ENSSSCT00000004747.2	28,27,26,25,24,23,22,21,20	chr1:60891652-60892774|chr1:60905657-60908343
chr1	60892774	60924967	-	12	circRNA	ENSSSCT00000004747.2	28,27,26,25,24,23,22,21,20,19,18,17	chr1:60891652-60892774|chr1:60924967-60927642
chr1	60892774	60945988	-	22	circRNA	ENSSSCT00000004747.2	28,27,26,25,24,23,22,21,20,19,18,17,16,15,14,13,12,11,10,9,8,7	chr1:60891652-60892774|chr1:60945988-60950966
chr1	60892774	60959765	-	27	circRNA	ENSSSCT00000004747.2	28,27,26,25,24,23,22,21,20,19,18,17,16,15,14,13,12,11,10,9,8,7,6,5,4,3,2	chr1:60891652-60892774|chr1:60959765-60977291
chr1	60893529	60900407	-	6	circRNA	ENSSSCT00000004747.2	27,26,25,24,23,22	chr1:60892831-60893529|chr1:60900407-60903251
chr1	60893529	60924967	-	11	circRNA	ENSSSCT00000004747.2	27,26,25,24,23,22,21,20,19,18,17	chr1:60892831-60893529|chr1:60924967-60927642
chr1	60893529	60932819	-	15	circRNA	ENSSSCT00000004747.2	27,26,25,24,23,22,21,20,19,18,17,16,15,14,13	chr1:60892831-60893529|chr1:60932819-60938693
chr1	60893529	60941431	-	20	circRNA	ENSSSCT00000004747.2	27,26,25,24,23,22,21,20,19,18,17,16,15,14,13,12,11,10,9,8	chr1:60892831-60893529|chr1:60941431-60945903
chr1	60896459	60897286	-	3	circRNA	ENSSSCT00000004747.2	26,25,24	chr1:60893621-60896459|chr1:60897286-60900122
chr1	60896459	60905657	-	7	circRNA	ENSSSCT00000004747.2	26,25,24,23,22,21,20	chr1:60893621-60896459|chr1:60905657-60908343
chr1	60896459	60918135	-	9	circRNA	ENSSSCT00000004747.2	26,25,24,23,22,21,20,19,18	chr1:60893621-60896459|chr1:60918135-60924834
chr1	60900122	60905657	-	4	circRNA	ENSSSCT00000004747.2	23,22,21,20	chr1:60897286-60900122|chr1:60905657-60908343
chr1	60900122	60924967	-	7	circRNA	ENSSSCT00000004747.2	23,22,21,20,19,18,17	chr1:60897286-60900122|chr1:60924967-60927642
chr1	60900122	60932819	-	11	circRNA	ENSSSCT00000004747.2	23,22,21,20,19,18,17,16,15,14,13	chr1:60897286-60900122|chr1:60932819-60938693
chr1	60903251	60924967	-	5	circRNA	ENSSSCT00000004747.2	21,20,19,18,17	chr1:60900407-60903251|chr1:60924967-60927642
chr1	60908343	60951054	-	14	circRNA	ENSSSCT00000004747.2	19,18,17,16,15,14,13,12,11,10,9,8,7,6	chr1:60905657-60908343|chr1:60951054-60953148
chr1	60917933	60932819	-	6	circRNA	ENSSSCT00000004747.2	18,17,16,15,14,13	chr1:60908427-60917933|chr1:60932819-60938693
chr1	60917933	60959765	-	17	circRNA	ENSSSCT00000004747.2	18,17,16,15,14,13,12,11,10,9,8,7,6,5,4,3,2	chr1:60908427-60917933|chr1:60959765-60977291
chr1	60924834	60927669	-	2	circRNA	ENSSSCT00000004747.2	17,16	chr1:60918135-60924834|chr1:60927669-60931626
chr1	60924834	60932819	-	5	circRNA	ENSSSCT00000004747.2	17,16,15,14,13	chr1:60918135-60924834|chr1:60932819-60938693
chr1	60924834	60959765	-	16	circRNA	ENSSSCT00000004747.2	17,16,15,14,13,12,11,10,9,8,7,6,5,4,3,2	chr1:60918135-60924834|chr1:60959765-60977291
chr1	60931626	60932819	-	3	circRNA	ENSSSCT00000004747.2	15,14,13	chr1:60927669-60931626|chr1:60932819-60938693
chr1	60931626	60945988	-	9	circRNA	ENSSSCT00000004747.2	15,14,13,12,11,10,9,8,7	chr1:60927669-60931626|chr1:60945988-60950966
chr1	60931626	60953192	-	11	circRNA	ENSSSCT00000004747.2	15,14,13,12,11,10,9,8,7,6,5	chr1:60927669-60931626|chr1:60953192-60958626
chr1	60931626	60959765	-	14	circRNA	ENSSSCT00000004747.2	15,14,13,12,11,10,9,8,7,6,5,4,3,2	chr1:60927669-60931626|chr1:60959765-60977291
chr1	60932166	60938985	-	4	circRNA	ENSSSCT00000004747.2	14,13,12,11	chr1:60931685-60932166|chr1:60938985-60939093
chr1	60938693	60951054	-	7	circRNA	ENSSSCT00000004747.2	12,11,10,9,8,7,6	chr1:60932819-60938693|chr1:60951054-60953148
chr1	60938693	60959765	-	11	circRNA	ENSSSCT00000004747.2	12,11,10,9,8,7,6,5,4,3,2	chr1:60932819-60938693|chr1:60959765-60977291
chr1	60941274	60945988	-	2	circRNA	ENSSSCT00000004747.2	8,7	chr1:60939946-60941274|chr1:60945988-60950966
chr1	60945903	60953192	-	3	circRNA	ENSSSCT00000004747.2	7,6,5	chr1:60941431-60945903|chr1:60953192-60958626
chr1	60950966	60959765	-	5	circRNA	ENSSSCT00000004747.2	6,5,4,3,2	chr1:60945988-60950966|chr1:60959765-60977291
chr1	60958626	60959765	-	3	circRNA	ENSSSCT00000004747.2	4,3,2	chr1:60953192-60958626|chr1:60959765-60977291
chr1	61006638	61007238	-	2	circRNA	ENSSSCT00000004748.2	10,9	chr1:61000624-61006638|chr1:61007238-61009632
chr1	61006638	61009838	-	3	circRNA	ENSSSCT00000004748.2	10,9,8	chr1:61000624-61006638|chr1:61009838-61011478
chr1	61006638	61011614	-	4	circRNA	ENSSSCT00000004748.2	10,9,8,7	chr1:61000624-61006638|chr1:61011614-61022529
chr1	61009632	61011614	-	2	circRNA	ENSSSCT00000004748.2	8,7	chr1:61007238-61009632|chr1:61011614-61022529
chr1	62359383	62362228	+	3	circRNA	ENSSSCT00000029112.1	2,3,4	chr1:62311858-62359383|chr1:62362228-62377823
chr1	62359383	62387755	+	6	circRNA	ENSSSCT00000029112.1	2,3,4,5,6,7	chr1:62311858-62359383|chr1:62387755-62396711
chr1	62472028	62472231	+	1	circRNA	ENSSSCT00000004755.2	4	chr1:62465407-62472028|chr1:62472231-62481050
chr1	62575663	62581773	+	3	circRNA	ENSSSCT00000004759.2	2,3,4	chr1:62558888-62575663|chr1:62581773-62584504
chr1	62575663	62585276	+	5	circRNA	ENSSSCT00000004759.2	2,3,4,5,6	chr1:62558888-62575663|chr1:62585276-62588141
chr1	62601980	62621757	+	4	circRNA	ENSSSCT00000004757.2	4,5,6,7	chr1:62598556-62601980|chr1:62621757-62625704
chr1	62627527	62628509	+	3	circRNA	ENSSSCT00000004757.2	10,11,12	chr1:62627018-62627527|chr1:62628509-62628889
chr1	62678196	62693450	+	7	circRNA	ENSSSCT00000004761.2	2,3,4,5,6,7,8	chr1:62675334-62678196|chr1:62693450-62694949
chr1	62683861	62685779	+	2	circRNA	ENSSSCT00000004761.2	3,4	chr1:62678251-62683861|chr1:62685779-62688791
chr1	62683861	62699277	+	9	circRNA	ENSSSCT00000004761.2	3,4,5,6,7,8,9,10,11	chr1:62678251-62683861|chr1:62699277-62710641
chr1	62683861	62728124	+	14	circRNA	ENSSSCT00000004761.2	3,4,5,6,7,8,9,10,11,12,13,14,15,16	chr1:62678251-62683861|chr1:62728124-62732422
chr1	62685634	62693450	+	5	circRNA	ENSSSCT00000004761.2	4,5,6,7,8	chr1:62683959-62685634|chr1:62693450-62694949
chr1	62685634	62699277	+	8	circRNA	ENSSSCT00000004761.2	4,5,6,7,8,9,10,11	chr1:62683959-62685634|chr1:62699277-62710641
chr1	62688791	62693450	+	4	circRNA	ENSSSCT00000004761.2	5,6,7,8	chr1:62685779-62688791|chr1:62693450-62694949
chr1	62694949	62699277	+	3	circRNA	ENSSSCT00000004761.2	9,10,11	chr1:62693450-62694949|chr1:62699277-62710641
chr1	62694949	62728124	+	8	circRNA	ENSSSCT00000004761.2	9,10,11,12,13,14,15,16	chr1:62693450-62694949|chr1:62728124-62732422
chr1	62710641	62728124	+	5	circRNA	ENSSSCT00000004761.2	12,13,14,15,16	chr1:62699277-62710641|chr1:62728124-62732422
chr1	62793095	62795885	-	2	circRNA	ENSSSCT00000004762.2	3,2	chr1:62791538-62793095|chr1:62795885-62812325
chr1	63741388	63748701	-	3	circRNA	ENSSSCT00000004766.2	4,3,2	chr1:63739758-63741388|chr1:63748701-63750132
chr1	63969189	63975086	+	3	circRNA	ENSSSCT00000004769.2	2,3,4	chr1:63966622-63969189|chr1:63975086-63989754
chr1	63969189	63989890	+	4	circRNA	ENSSSCT00000004769.2	2,3,4,5	chr1:63966622-63969189|chr1:63989890-63991185
chr1	63989890	63991181	+	1	ciRNA	ENSSSCT00000004769.2	5	chr1:63989890-63991185
chr1	64125098	64134683	-	6	circRNA	ENSSSCT00000004773.2	7,6,5,4,3,2	chr1:64118792-64125098|chr1:64134683-64142130
chr1	64127212	64132372	-	4	circRNA	ENSSSCT00000004773.2	6,5,4,3	chr1:64125218-64127212|chr1:64132372-64134609
chr1	64168767	64171637	-	3	circRNA	ENSSSCT00000004774.2	5,4,3	chr1:64163598-64168767|chr1:64171637-64178760
chr1	64170130	64171637	-	2	circRNA	ENSSSCT00000004774.2	4,3	chr1:64168910-64170130|chr1:64171637-64178760
chr1	64530709	64532147	+	2	circRNA	ENSSSCT00000004778.2	7,8	chr1:64528418-64530709|chr1:64532147-64536508
chr1	64626617	64627678	-	2	circRNA	ENSSSCT00000004784.2	33,32	chr1:64625394-64626617|chr1:64627678-64629826
chr1	64636511	64638406	-	3	circRNA	ENSSSCT00000004784.2	23,22,21	chr1:64635631-64636511|chr1:64638406-64641102
chr1	64644354	64649966	-	5	circRNA	ENSSSCT00000004784.2	17,16,15,14,13	chr1:64643978-64644354|chr1:64649966-64650318
chr1	64653758	64656155	-	3	circRNA	ENSSSCT00000004784.2	10,9,8	chr1:64650770-64653758|chr1:64656155-64658356
chr1	64711528	64718073	-	9	circRNA	ENSSSCT00000004785.2	29,28,27,26,25,24,23,22,21	chr1:64709285-64711528|chr1:64718073-64720247
chr1	64724998	64725754	-	2	circRNA	ENSSSCT00000004785.2	17,16	chr1:64723116-64724998|chr1:64725754-64727563
chr1	64727563	64728433	-	2	circRNA	ENSSSCT00000004785.2	15,14	chr1:64725754-64727563|chr1:64728433-64730429
chr1	64727563	64737924	-	7	circRNA	ENSSSCT00000004785.2	15,14,13,12,11,10,9	chr1:64725754-64727563|chr1:64737924-64739889
chr1	64730429	64735305	-	4	circRNA	ENSSSCT00000004785.2	13,12,11,10	chr1:64728433-64730429|chr1:64735305-64737842
chr1	64730429	64754863	-	11	circRNA	ENSSSCT00000004785.2	13,12,11,10,9,8,7,6,5,4,3	chr1:64728433-64730429|chr1:64754863-64770035
chr1	64731984	64735305	-	3	circRNA	ENSSSCT00000004785.2	12,11,10	chr1:64730490-64731984|chr1:64735305-64737842
chr1	64731984	64737924	-	4	circRNA	ENSSSCT00000004785.2	12,11,10,9	chr1:64730490-64731984|chr1:64737924-64739889
chr1	64737842	64740083	-	2	circRNA	ENSSSCT00000004785.2	9,8	chr1:64735305-64737842|chr1:64740083-64750117
chr1	64737842	64750734	-	4	circRNA	ENSSSCT00000004785.2	9,8,7,6	chr1:64735305-64737842|chr1:64750734-64753913
chr1	64737842	64754863	-	7	circRNA	ENSSSCT00000004785.2	9,8,7,6,5,4,3	chr1:64735305-64737842|chr1:64754863-64770035
chr1	64739889	64750734	-	3	circRNA	ENSSSCT00000004785.2	8,7,6	chr1:64737924-64739889|chr1:64750734-64753913
chr1	64753913	64754863	-	3	circRNA	ENSSSCT00000004785.2	5,4,3	chr1:64750734-64753913|chr1:64754863-64770035
chr1	64793281	64797630	+	4	circRNA	ENSSSCT00000004787.3	2,3,4,5	chr1:64791879-64793281|chr1:64797630-64800340
chr1	71041496	71055642	+	2	circRNA	ENSSSCT00000004793.2	2,3	chr1:71027254-71041496|chr1:71055642-71078643
chr1	72012305	72015264	+	3	circRNA	ENSSSCT00000004795.2	4,5,6	chr1:72010071-72012305|chr1:72015264-72029647
chr1	72029647	72041578	+	8	circRNA	ENSSSCT00000004795.2	7,8,9,10,11,12,13,14	chr1:72015264-72029647|chr1:72041578-72055210
chr1	72029647	72055341	+	9	circRNA	ENSSSCT00000004795.2	7,8,9,10,11,12,13,14,15	chr1:72015264-72029647|chr1:72055341-72064886
chr1	72651151	72656373	+	3	circRNA	ENSSSCT00000031034.1	2,3,4	chr1:72650921-72651151|chr1:72656373-72722701
chr1	72746155	72746367	-	1	circRNA	ENSSSCT00000004800.2	12	chr1:72743894-72746155|chr1:72746367-72749465
chr1	72811960	72840853	-	4	circRNA	ENSSSCT00000004800.2	5,4,3,2	chr1:72768093-72811960|chr1:72840853-72852049
chr1	74429976	74460814	-	4	circRNA	ENSSSCT00000004804.2	7,6,5,4	chr1:74425895-74429976|chr1:74460814-74468899
chr1	74429976	74470252	-	6	circRNA	ENSSSCT00000004804.2	7,6,5,4,3,2	chr1:74425895-74429976|chr1:74470252-74484693
chr1	74443451	74451249	-	2	circRNA	ENSSSCT00000004804.2	6,5	chr1:74430048-74443451|chr1:74451249-74460468
chr1	74443451	74460814	-	3	circRNA	ENSSSCT00000004804.2	6,5,4	chr1:74430048-74443451|chr1:74460814-74468899
chr1	74443451	74470252	-	5	circRNA	ENSSSCT00000004804.2	6,5,4,3,2	chr1:74430048-74443451|chr1:74470252-74484693
chr1	74451004	74460814	-	2	circRNA	ENSSSCT00000004804.2	5,4	chr1:74443665-74451004|chr1:74460814-74468899
chr1	75075482	75082790	-	5	circRNA	ENSSSCT00000004808.2	13,12,11,10,9	chr1:75073842-75075482|chr1:75082790-75089370
chr1	75077812	75082790	-	4	circRNA	ENSSSCT00000004808.2	12,11,10,9	chr1:75076155-75077812|chr1:75082790-75089370
chr1	75077812	75089458	-	5	circRNA	ENSSSCT00000004808.2	12,11,10,9,8	chr1:75076155-75077812|chr1:75089458-75096803
chr1	75077812	75101925	-	8	circRNA	ENSSSCT00000004808.2	12,11,10,9,8,7,6,5	chr1:75076155-75077812|chr1:75101925-75115736
chr1	75080464	75082790	-	2	circRNA	ENSSSCT00000004808.2	10,9	chr1:75078353-75080464|chr1:75082790-75089370
chr1	75082708	75101925	-	5	circRNA	ENSSSCT00000004808.2	9,8,7,6,5	chr1:75080556-75082708|chr1:75101925-75115736
chr1	75089370	75101925	-	4	circRNA	ENSSSCT00000004808.2	8,7,6,5	chr1:75082790-75089370|chr1:75101925-75115736
chr1	75089370	75122293	-	7	circRNA	ENSSSCT00000004808.2	8,7,6,5,4,3,2	chr1:75082790-75089370|chr1:75122293-75126401
chr1	75096803	75101925	-	3	circRNA	ENSSSCT00000004808.2	7,6,5	chr1:75089458-75096803|chr1:75101925-75115736
chr1	75153935	75168505	-	10	circRNA	ENSSSCT00000004810.2	12,11,10,9,8,7,6,5,4,3	chr1:75152626-75153935|chr1:75168505-75169199
chr1	75153935	75169306	-	11	circRNA	ENSSSCT00000004810.2	12,11,10,9,8,7,6,5,4,3,2	chr1:75152626-75153935|chr1:75169306-75175197
chr1	75159772	75169306	-	8	circRNA	ENSSSCT00000004810.2	9,8,7,6,5,4,3,2	chr1:75159107-75159772|chr1:75169306-75175197
chr1	75168131	75169306	-	3	circRNA	ENSSSCT00000004810.2	4,3,2	chr1:75164575-75168131|chr1:75169306-75175197
chr1	76210845	76215451	-	3	circRNA	ENSSSCT00000004816.2	4,3,2	chr1:76209492-76210845|chr1:76215451-76219034
chr1	76213542	76215451	-	2	circRNA	ENSSSCT00000004816.2	3,2	chr1:76210944-76213542|chr1:76215451-76219034
chr1	77113375	77117222	+	2	circRNA	ENSSSCT00000032833.1	1,2	None|chr1:77117222-77154071
chr1	77113375	77164321	+	5	circRNA	ENSSSCT00000032833.1	1,2,3,4,5	None|chr1:77164321-77317680
chr1	77439850	77540286	+	6	circRNA	ENSSSCT00000004819.2	11,12,13,14,15,16	chr1:77407812-77439850|chr1:77540286-77554230
chr1	80241843	80293999	-	5	circRNA	ENSSSCT00000004823.2	23,22,21,20,19	chr1:80234867-80241843|chr1:80293999-80301143
chr1	80241843	80313405	-	12	circRNA	ENSSSCT00000004823.2	23,22,21,20,19,18,17,16,15,14,13,12	chr1:80234867-80241843|chr1:80313405-80320769
chr1	80283904	80293999	-	3	circRNA	ENSSSCT00000004823.2	21,20,19	chr1:80242290-80283904|chr1:80293999-80301143
chr1	80293138	80305582	-	8	circRNA	ENSSSCT00000004823.2	20,19,18,17,16,15,14,13	chr1:80284036-80293138|chr1:80305582-80313070
chr1	80301609	80327183	-	6	circRNA	ENSSSCT00000004823.2	15,14,13,12,11,10	chr1:80301514-80301609|chr1:80327183-80327775
chr1	80305181	80320920	-	4	circRNA	ENSSSCT00000004823.2	14,13,12,11	chr1:80301721-80305181|chr1:80320920-80327076
chr1	80305181	80328942	-	7	circRNA	ENSSSCT00000004823.2	14,13,12,11,10,9,8	chr1:80301721-80305181|chr1:80328942-80332935
chr1	80320769	80328942	-	4	circRNA	ENSSSCT00000004823.2	11,10,9,8	chr1:80313405-80320769|chr1:80328942-80332935
chr1	80327076	80328942	-	3	circRNA	ENSSSCT00000004823.2	10,9,8	chr1:80320920-80327076|chr1:80328942-80332935
chr1	80327076	80347867	-	5	circRNA	ENSSSCT00000004823.2	10,9,8,7,6	chr1:80320920-80327076|chr1:80347867-80356326
chr1	80332935	80347867	-	2	circRNA	ENSSSCT00000004823.2	7,6	chr1:80328942-80332935|chr1:80347867-80356326
chr1	80332935	80356402	-	3	circRNA	ENSSSCT00000004823.2	7,6,5	chr1:80328942-80332935|chr1:80356402-80363473
chr1	80347735	80365853	-	5	circRNA	ENSSSCT00000004823.2	6,5,4,3,2	chr1:80333018-80347735|chr1:80365853-80376089
chr1	80356326	80365853	-	4	circRNA	ENSSSCT00000004823.2	5,4,3,2	chr1:80347867-80356326|chr1:80365853-80376089
chr1	80660554	80671102	-	4	circRNA	ENSSSCT00000004825.2	7,6,5,4	chr1:80638953-80660554|chr1:80671102-80673951
chr1	80660554	80674076	-	5	circRNA	ENSSSCT00000004825.2	7,6,5,4,3	chr1:80638953-80660554|chr1:80674076-80676859
chr1	80661946	80671102	-	3	circRNA	ENSSSCT00000004825.2	6,5,4	chr1:80660696-80661946|chr1:80671102-80673951
chr1	80661946	80674076	-	4	circRNA	ENSSSCT00000004825.2	6,5,4,3	chr1:80660696-80661946|chr1:80674076-80676859
chr1	80669933	80671102	-	2	circRNA	ENSSSCT00000004825.2	5,4	chr1:80662114-80669933|chr1:80671102-80673951
chr1	80669933	80674076	-	3	circRNA	ENSSSCT00000004825.2	5,4,3	chr1:80662114-80669933|chr1:80674076-80676859
chr1	80669933	80677096	-	4	circRNA	ENSSSCT00000004825.2	5,4,3,2	chr1:80662114-80669933|chr1:80677096-80680929
chr1	80670914	80674076	-	2	circRNA	ENSSSCT00000004825.2	4,3	chr1:80670042-80670914|chr1:80674076-80676859
chr1	80703288	80705328	-	2	circRNA	ENSSSCT00000004828.2	3,2	chr1:80702092-80703288|chr1:80705328-80720849
chr1	80866820	80877325	-	3	circRNA	ENSSSCT00000004829.2	4,3,2	chr1:80837746-80866820|chr1:80877325-80892277
chr1	82008873	82014706	+	4	circRNA	ENSSSCT00000027684.1	4,5,6,7	chr1:82005090-82008873|chr1:82014706-82029757
chr1	82034538	82034903	+	2	circRNA	ENSSSCT00000027684.1	11,12	chr1:82033340-82034538|chr1:82034903-82044141
chr1	82091326	82105874	-	4	circRNA	ENSSSCT00000004834.1	5,4,3,2	chr1:82080062-82091326|chr1:82105874-82111389
chr1	82103870	82105874	-	3	circRNA	ENSSSCT00000004834.1	4,3,2	chr1:82091375-82103870|chr1:82105874-82111389
chr1	82119012	82120725	+	2	circRNA	ENSSSCT00000004835.2	3,4	chr1:82118266-82119012|chr1:82120725-82124811
chr1	82119012	82124988	+	3	circRNA	ENSSSCT00000004835.2	3,4,5	chr1:82118266-82119012|chr1:82124988-82129481
chr1	82119012	82131866	+	7	circRNA	ENSSSCT00000004835.2	3,4,5,6,7,8,9	chr1:82118266-82119012|chr1:82131866-82140145
chr1	82129481	82129859	+	2	circRNA	ENSSSCT00000004835.2	6,7	chr1:82124988-82129481|chr1:82129859-82131023
chr1	83281459	83314537	-	16	circRNA	ENSSSCT00000004844.2	19,18,17,16,15,14,13,12,11,10,9,8,7,6,5,4	chr1:83279252-83281459|chr1:83314537-83316652
chr1	83289161	83293447	-	4	circRNA	ENSSSCT00000004844.2	18,17,16,15	chr1:83281558-83289161|chr1:83293447-83296706
chr1	83291218	83296789	-	4	circRNA	ENSSSCT00000004844.2	17,16,15,14	chr1:83289263-83291218|chr1:83296789-83299113
chr1	83293023	83299261	-	4	circRNA	ENSSSCT00000004844.2	16,15,14,13	chr1:83291377-83293023|chr1:83299261-83300055
chr1	83299113	83301016	-	3	circRNA	ENSSSCT00000004844.2	13,12,11	chr1:83296789-83299113|chr1:83301016-83303146
chr1	83299113	83306149	-	6	circRNA	ENSSSCT00000004844.2	13,12,11,10,9,8	chr1:83296789-83299113|chr1:83306149-83307811
chr1	83299113	83314537	-	10	circRNA	ENSSSCT00000004844.2	13,12,11,10,9,8,7,6,5,4	chr1:83296789-83299113|chr1:83314537-83316652
chr1	83300055	83301016	-	2	circRNA	ENSSSCT00000004844.2	12,11	chr1:83299261-83300055|chr1:83301016-83303146
chr1	83300055	83323066	-	11	circRNA	ENSSSCT00000004844.2	12,11,10,9,8,7,6,5,4,3,2	chr1:83299261-83300055|chr1:83323066-83348987
chr1	83300923	83303472	-	3	circRNA	ENSSSCT00000004844.2	11,10,9	chr1:83300210-83300923|chr1:83303472-83306040
chr1	83303146	83316767	-	8	circRNA	ENSSSCT00000004844.2	10,9,8,7,6,5,4,3	chr1:83301016-83303146|chr1:83316767-83322966
chr1	83314424	83323066	-	3	circRNA	ENSSSCT00000004844.2	4,3,2	chr1:83310332-83314424|chr1:83323066-83348987
chr1	83316652	83323066	-	2	circRNA	ENSSSCT00000004844.2	3,2	chr1:83314537-83316652|chr1:83323066-83348987
chr1	83761690	83803523	+	3	circRNA	ENSSSCT00000004848.2	4,5,6	chr1:83727080-83761690|chr1:83803523-83827422
chr1	84047499	84048935	+	1	circRNA	ENSSSCT00000004849.2	3	chr1:83888769-84047499|None
chr1	84358818	84371187	-	8	circRNA	ENSSSCT00000004853.2	9,8,7,6,5,4,3,2	chr1:84358285-84358818|chr1:84371187-84373627
chr1	84362745	84369923	-	5	circRNA	ENSSSCT00000004853.2	7,6,5,4,3	chr1:84360374-84362745|chr1:84369923-84371121
chr1	84362745	84371187	-	6	circRNA	ENSSSCT00000004853.2	7,6,5,4,3,2	chr1:84360374-84362745|chr1:84371187-84373627
chr1	84364417	84371187	-	5	circRNA	ENSSSCT00000004853.2	6,5,4,3,2	chr1:84362858-84364417|chr1:84371187-84373627
chr1	84366709	84369923	-	3	circRNA	ENSSSCT00000004853.2	5,4,3	chr1:84364565-84366709|chr1:84369923-84371121
chr1	84366709	84371187	-	4	circRNA	ENSSSCT00000004853.2	5,4,3,2	chr1:84364565-84366709|chr1:84371187-84373627
chr1	84661123	84707661	+	16	circRNA	ENSSSCT00000004878.2	4,5,6,7,8,9,10,11,12,13,14,15,16,17,18,19	chr1:84651912-84661123|chr1:84707661-84709343
chr1	84695204	84698161	+	4	circRNA	ENSSSCT00000004878.2	14,15,16,17	chr1:84692510-84695204|chr1:84698161-84700206
chr1	84700206	84707661	+	2	circRNA	ENSSSCT00000004878.2	18,19	chr1:84698161-84700206|chr1:84707661-84709343
chr1	84723987	84730465	-	3	circRNA	ENSSSCT00000004877.3	5,4,3	chr1:84722022-84723987|chr1:84730465-84732499
chr1	84723987	84732574	-	4	circRNA	ENSSSCT00000004877.3	5,4,3,2	chr1:84722022-84723987|chr1:84732574-84735586
chr1	85505385	85515279	-	6	circRNA	ENSSSCT00000004868.2	9,8,7,6,5,4	chr1:85452801-85505385|chr1:85515279-85523082
chr1	85505385	85523221	-	7	circRNA	ENSSSCT00000004868.2	9,8,7,6,5,4,3	chr1:85452801-85505385|chr1:85523221-85538626
chr1	85692376	85694000	+	2	circRNA	ENSSSCT00000004866.2	4,5	chr1:85685833-85692376|chr1:85694000-85695288
chr1	85692376	85703772	+	9	circRNA	ENSSSCT00000004866.2	4,5,6,7,8,9,10,11,12	chr1:85685833-85692376|chr1:85703772-85709674
chr1	85695288	85703152	+	6	circRNA	ENSSSCT00000004866.2	6,7,8,9,10,11	chr1:85694000-85695288|chr1:85703152-85703638
chr1	85703036	85709751	+	3	circRNA	ENSSSCT00000004866.2	11,12,13	chr1:85701802-85703036|chr1:85709751-85711802
chr1	86310249	86333500	-	5	circRNA	ENSSSCT00000004857.2	8,7,6,5,4	chr1:86305883-86310249|chr1:86333500-86337978
chr1	86322009	86326869	-	3	circRNA	ENSSSCT00000004857.2	7,6,5	chr1:86310352-86322009|chr1:86326869-86333460
chr1	86322009	86338016	-	5	circRNA	ENSSSCT00000004857.2	7,6,5,4,3	chr1:86310352-86322009|chr1:86338016-86341898
chr1	86322009	86342031	-	6	circRNA	ENSSSCT00000004857.2	7,6,5,4,3,2	chr1:86310352-86322009|chr1:86342031-86345675
chr1	86325612	86338016	-	4	circRNA	ENSSSCT00000004857.2	6,5,4,3	chr1:86322109-86325612|chr1:86338016-86341898
chr1	86325612	86342031	-	5	circRNA	ENSSSCT00000004857.2	6,5,4,3,2	chr1:86322109-86325612|chr1:86342031-86345675
chr1	86333460	86342031	-	3	circRNA	ENSSSCT00000004857.2	4,3,2	chr1:86326869-86333460|chr1:86342031-86345675
chr1	86364307	86364519	-	2	circRNA	ENSSSCT00000004856.2	4,3	chr1:86360311-86364307|chr1:86364519-86365674
chr1	86402705	86403426	-	4	circRNA	ENSSSCT00000004855.2	8,7,6,5	chr1:86401759-86402705|chr1:86403426-86404397
chr1	86583593	86624705	+	7	circRNA	ENSSSCT00000026193.1	4,5,6,7,8,9,10	chr1:86580240-86583593|chr1:86624705-86631397
chr1	86583593	86631512	+	8	circRNA	ENSSSCT00000026193.1	4,5,6,7,8,9,10,11	chr1:86580240-86583593|chr1:86631512-86638822
chr1	86593234	86631512	+	7	circRNA	ENSSSCT00000026193.1	5,6,7,8,9,10,11	chr1:86583712-86593234|chr1:86631512-86638822
chr1	86605589	86631512	+	6	circRNA	ENSSSCT00000026193.1	6,7,8,9,10,11	chr1:86593353-86605589|chr1:86631512-86638822
chr1	86624595	86631512	+	2	circRNA	ENSSSCT00000026193.1	10,11	chr1:86612583-86624595|chr1:86631512-86638822
chr1	86683064	86685128	-	2	circRNA	ENSSSCT00000004882.2	3,2	chr1:86681251-86683064|chr1:86685128-86687747
chr1	86836070	86842986	-	2	circRNA	ENSSSCT00000004881.2	4,3	chr1:86828760-86836070|chr1:86842986-86854995
chr1	86878850	86895269	-	4	circRNA	ENSSSCT00000025331.1	5,4,3,2	chr1:86873694-86878850|chr1:86895269-86950062
chr1	86878850	86950190	-	5	circRNA	ENSSSCT00000025331.1	5,4,3,2,1	chr1:86873694-86878850|None
chr1	86885064	86950190	-	4	circRNA	ENSSSCT00000025331.1	4,3,2,1	chr1:86878950-86885064|None
chr1	87051980	87058229	-	3	circRNA	ENSSSCT00000004883.3	8,7,6	chr1:87048517-87051980|chr1:87058229-87063512
chr1	87051980	87071625	-	6	circRNA	ENSSSCT00000004883.3	8,7,6,5,4,3	chr1:87048517-87051980|chr1:87071625-87083863
chr1	87749485	87752243	-	3	circRNA	ENSSSCT00000004890.2	27,26,25	chr1:87747502-87749485|chr1:87752243-87753750
chr1	87763597	87782213	-	14	circRNA	ENSSSCT00000004890.2	21,20,19,18,17,16,15,14,13,12,11,10,9,8	chr1:87762430-87763597|chr1:87782213-87787340
chr1	87778132	87782213	-	3	circRNA	ENSSSCT00000004890.2	10,9,8	chr1:87775762-87778132|chr1:87782213-87787340
chr1	87783933	87787340	-	1	ciRNA	ENSSSCT00000004890.2	7	chr1:87782213-87787340
chr1	87974402	87980116	-	2	circRNA	ENSSSCT00000004893.2	4,3	chr1:87822853-87974402|chr1:87980116-87996185
chr1	89930247	89935970	-	5	circRNA	ENSSSCT00000004897.2	13,12,11,10,9	chr1:89929581-89930247|chr1:89935970-89940533
chr1	89934334	89940816	-	5	circRNA	ENSSSCT00000004897.2	11,10,9,8,7	chr1:89933362-89934334|chr1:89940816-89943823
chr1	89934334	89947529	-	8	circRNA	ENSSSCT00000004897.2	11,10,9,8,7,6,5,4	chr1:89933362-89934334|chr1:89947529-89949853
chr1	89935482	89940816	-	4	circRNA	ENSSSCT00000004897.2	10,9,8,7	chr1:89934465-89935482|chr1:89940816-89943823
chr1	89940533	89940816	-	2	circRNA	ENSSSCT00000004897.2	8,7	chr1:89935970-89940533|chr1:89940816-89943823
chr1	89943823	89951181	-	5	circRNA	ENSSSCT00000004897.2	6,5,4,3,2	chr1:89940816-89943823|chr1:89951181-89962710
chr1	89946849	89947529	-	2	circRNA	ENSSSCT00000004897.2	5,4	chr1:89943965-89946849|chr1:89947529-89949853
chr1	89946849	89951181	-	4	circRNA	ENSSSCT00000004897.2	5,4,3,2	chr1:89943965-89946849|chr1:89951181-89962710
chr1	89949853	89951181	-	2	circRNA	ENSSSCT00000004897.2	3,2	chr1:89947529-89949853|chr1:89951181-89962710
chr1	91970429	91988926	+	5	circRNA	ENSSSCT00000004900.2	7,8,9,10,11	chr1:91880370-91970429|chr1:91988926-91995753
chr1	92392756	92400835	+	5	circRNA	ENSSSCT00000004911.2	2,3,4,5,6	chr1:92385109-92392756|chr1:92400835-92403136
chr1	92868879	92892154	+	5	circRNA	ENSSSCT00000004918.2	7,8,9,10,11	chr1:92863735-92868879|chr1:92892154-92906385
chr1	93078496	93084768	+	2	circRNA	ENSSSCT00000004920.2	2,3	chr1:93076634-93078496|chr1:93084768-93126379
chr1	93078496	93142829	+	5	circRNA	ENSSSCT00000004920.2	2,3,4,5,6	chr1:93076634-93078496|chr1:93142829-93195379
chr1	93126379	93129513	+	2	circRNA	ENSSSCT00000004920.2	4,5	chr1:93084768-93126379|chr1:93129513-93142725
chr1	93126379	93142829	+	3	circRNA	ENSSSCT00000004920.2	4,5,6	chr1:93084768-93126379|chr1:93142829-93195379
chr1	93269647	93277132	+	5	circRNA	ENSSSCT00000004922.2	7,8,9,10,11	chr1:93267360-93269647|chr1:93277132-93278993
chr1	93283914	93284920	-	2	circRNA	ENSSSCT00000022952.1	33,32	chr1:93281960-93283914|chr1:93284920-93288553
chr1	93294016	93311966	-	11	circRNA	ENSSSCT00000035912.1	30,29,28,27,26,25,24,23,22,21,20	chr1:93293610-93294016|chr1:93311966-93363328
chr1	93363328	93365318	-	1	circRNA	ENSSSCT00000035912.1	19	chr1:93311966-93363328|chr1:93365318-93367163
chr1	93367163	93381747	-	8	circRNA	ENSSSCT00000035912.1	18,17,16,15,14,13,12,11	chr1:93365318-93367163|chr1:93381747-93383887
chr1	93367163	93384007	-	9	circRNA	ENSSSCT00000035912.1	18,17,16,15,14,13,12,11,10	chr1:93365318-93367163|chr1:93384007-93385632
chr1	93372923	93380925	-	3	circRNA	ENSSSCT00000035912.1	15,14,13	chr1:93371523-93372923|chr1:93380925-93381233
chr1	93373610	93380925	-	2	circRNA	ENSSSCT00000035912.1	14,13	chr1:93373198-93373610|chr1:93380925-93381233
chr1	93380691	93415072	-	13	circRNA	ENSSSCT00000035912.1	13,12,11,10,9,8,7,6,5,4,3,2,1	chr1:93374232-93380691|None
chr1	93396708	93415072	-	5	circRNA	ENSSSCT00000035912.1	5,4,3,2,1	chr1:93389276-93396708|None
chr1	93400454	93410892	-	3	circRNA	ENSSSCT00000004923.2	4,3,2	chr1:93396807-93400454|chr1:93410892-93414881
chr1	93410710	93415072	-	2	circRNA	ENSSSCT00000035912.1	2,1	chr1:93403062-93410710|None
chr1	94522914	94542426	+	9	circRNA	ENSSSCT00000004926.2	2,3,4,5,6,7,8,9,10	chr1:94512737-94522914|chr1:94542426-94546058
chr1	94529064	94530415	+	2	circRNA	ENSSSCT00000004926.2	3,4	chr1:94523610-94529064|chr1:94530415-94532156
chr1	94529064	94532267	+	3	circRNA	ENSSSCT00000004926.2	3,4,5	chr1:94523610-94529064|chr1:94532267-94535553
chr1	94529064	94539975	+	7	circRNA	ENSSSCT00000004926.2	3,4,5,6,7,8,9	chr1:94523610-94529064|chr1:94539975-94542248
chr1	94529064	94575209	+	21	circRNA	ENSSSCT00000004926.2	3,4,5,6,7,8,9,10,11,12,13,14,15,16,17,18,19,20,21,22,23	chr1:94523610-94529064|chr1:94575209-94576968
chr1	94529064	94577735	+	23	circRNA	ENSSSCT00000004926.2	3,4,5,6,7,8,9,10,11,12,13,14,15,16,17,18,19,20,21,22,23,24,25	chr1:94523610-94529064|chr1:94577735-94595325
chr1	94535553	94542426	+	5	circRNA	ENSSSCT00000004926.2	6,7,8,9,10	chr1:94532267-94535553|chr1:94542426-94546058
chr1	94535553	94546236	+	6	circRNA	ENSSSCT00000004926.2	6,7,8,9,10,11	chr1:94532267-94535553|chr1:94546236-94547632
chr1	94537417	94539975	+	3	circRNA	ENSSSCT00000004926.2	7,8,9	chr1:94535724-94537417|chr1:94539975-94542248
chr1	94537417	94546236	+	5	circRNA	ENSSSCT00000004926.2	7,8,9,10,11	chr1:94535724-94537417|chr1:94546236-94547632
chr1	94539851	94546236	+	3	circRNA	ENSSSCT00000004926.2	9,10,11	chr1:94537805-94539851|chr1:94546236-94547632
chr1	94542248	94546236	+	2	circRNA	ENSSSCT00000004926.2	10,11	chr1:94539975-94542248|chr1:94546236-94547632
chr1	94542248	94556674	+	8	circRNA	ENSSSCT00000004926.2	10,11,12,13,14,15,16,17	chr1:94539975-94542248|chr1:94556674-94559521
chr1	94542248	94570658	+	12	circRNA	ENSSSCT00000004926.2	10,11,12,13,14,15,16,17,18,19,20,21	chr1:94539975-94542248|chr1:94570658-94572844
chr1	94547632	94549152	+	2	circRNA	ENSSSCT00000004926.2	12,13	chr1:94546236-94547632|chr1:94549152-94550328
chr1	94556572	94562622	+	3	circRNA	ENSSSCT00000004926.2	17,18,19	chr1:94551052-94556572|chr1:94562622-94568796
chr1	94556572	94572993	+	6	circRNA	ENSSSCT00000004926.2	17,18,19,20,21,22	chr1:94551052-94556572|chr1:94572993-94575045
chr1	94556572	94577735	+	9	circRNA	ENSSSCT00000004926.2	17,18,19,20,21,22,23,24,25	chr1:94551052-94556572|chr1:94577735-94595325
chr1	94556572	94595460	+	10	circRNA	ENSSSCT00000004926.2	17,18,19,20,21,22,23,24,25,26	chr1:94551052-94556572|chr1:94595460-94606586
chr1	94559521	94575209	+	6	circRNA	ENSSSCT00000004926.2	18,19,20,21,22,23	chr1:94556674-94559521|chr1:94575209-94576968
chr1	94568796	94577735	+	6	circRNA	ENSSSCT00000004926.2	20,21,22,23,24,25	chr1:94562622-94568796|chr1:94577735-94595325
chr1	94568796	94595460	+	7	circRNA	ENSSSCT00000004926.2	20,21,22,23,24,25,26	chr1:94562622-94568796|chr1:94595460-94606586
chr1	94575045	94577735	+	3	circRNA	ENSSSCT00000004926.2	23,24,25	chr1:94572993-94575045|chr1:94577735-94595325
chr1	94575045	94595460	+	4	circRNA	ENSSSCT00000004926.2	23,24,25,26	chr1:94572993-94575045|chr1:94595460-94606586
chr1	94595325	94595460	+	1	circRNA	ENSSSCT00000004926.2	26	chr1:94577735-94595325|chr1:94595460-94606586
chr1	96603029	96663976	-	5	circRNA	ENSSSCT00000004932.2	8,7,6,5,4	None|chr1:96663976-96702125
chr1	96603029	96704876	-	7	circRNA	ENSSSCT00000004932.2	8,7,6,5,4,3,2	None|chr1:96704876-96716331
chr1	96635643	96663976	-	4	circRNA	ENSSSCT00000004932.2	7,6,5,4	chr1:96603140-96635643|chr1:96663976-96702125
chr1	96661538	96663976	-	3	circRNA	ENSSSCT00000004932.2	6,5,4	chr1:96635741-96661538|chr1:96663976-96702125
chr1	96661538	96704876	-	5	circRNA	ENSSSCT00000004932.2	6,5,4,3,2	chr1:96635741-96661538|chr1:96704876-96716331
chr1	96702125	96704876	-	2	circRNA	ENSSSCT00000004932.2	3,2	chr1:96663976-96702125|chr1:96704876-96716331
chr1	96802616	96806044	-	4	circRNA	ENSSSCT00000004933.2	16,15,14,13	chr1:96793252-96802616|chr1:96806044-96811402
chr1	96822716	96825501	-	3	circRNA	ENSSSCT00000004933.2	5,4,3	chr1:96821582-96822716|chr1:96825501-96826966
chr1	97905978	97924771	+	3	circRNA	ENSSSCT00000004941.2	5,6,7	chr1:97889582-97905978|chr1:97924771-97942911
chr1	97905978	97952202	+	11	circRNA	ENSSSCT00000004941.2	5,6,7,8,9,10,11,12,13,14,15	chr1:97889582-97905978|chr1:97952202-97965071
chr1	97924610	97952202	+	9	circRNA	ENSSSCT00000004941.2	7,8,9,10,11,12,13,14,15	chr1:97906323-97924610|chr1:97952202-97965071
chr1	97949353	97952202	+	5	circRNA	ENSSSCT00000004941.2	11,12,13,14,15	chr1:97947642-97949353|chr1:97952202-97965071
chr1	97983037	97988350	+	3	circRNA	ENSSSCT00000004941.2	27,28,29	chr1:97979741-97983037|chr1:97988350-97989981
chr1	98001689	98010771	+	8	circRNA	ENSSSCT00000004941.2	37,38,39,40,41,42,43,44	chr1:97997912-98001689|chr1:98010771-98014672
chr1	100997725	101033107	-	15	circRNA	ENSSSCT00000004948.2	24,23,22,21,20,19,18,17,16,15,14,13,12,11,10	chr1:100995684-100997725|chr1:101033107-101036383
chr1	101000628	101003691	-	3	circRNA	ENSSSCT00000004948.2	22,21,20	chr1:100998726-101000628|chr1:101003691-101009472
chr1	101003397	101003691	-	2	circRNA	ENSSSCT00000004948.2	21,20	chr1:101000758-101003397|chr1:101003691-101009472
chr1	101003397	101009566	-	3	circRNA	ENSSSCT00000004948.2	21,20,19	chr1:101000758-101003397|chr1:101009566-101011816
chr1	101003397	101011855	-	4	circRNA	ENSSSCT00000004948.2	21,20,19,18	chr1:101000758-101003397|chr1:101011855-101015377
chr1	101003397	101015551	-	5	circRNA	ENSSSCT00000004948.2	21,20,19,18,17	chr1:101000758-101003397|chr1:101015551-101016103
chr1	101009472	101019674	-	5	circRNA	ENSSSCT00000004948.2	19,18,17,16,15	chr1:101003691-101009472|chr1:101019674-101021269
chr1	101009472	101026424	-	9	circRNA	ENSSSCT00000004948.2	19,18,17,16,15,14,13,12,11	chr1:101003691-101009472|chr1:101026424-101032926
chr1	101021269	101036464	-	6	circRNA	ENSSSCT00000004948.2	14,13,12,11,10,9	chr1:101019674-101021269|chr1:101036464-101040899
chr1	101036383	101052569	-	7	circRNA	ENSSSCT00000004948.2	9,8,7,6,5,4,3	chr1:101033107-101036383|chr1:101052569-101058620
chr1	101040899	101052569	-	6	circRNA	ENSSSCT00000004948.2	8,7,6,5,4,3	chr1:101036464-101040899|chr1:101052569-101058620
chr1	101178704	101190143	-	4	circRNA	ENSSSCT00000026640.1	14,13,12,11	chr1:101176951-101178704|chr1:101190143-101191387
chr1	101178704	101199679	-	7	circRNA	ENSSSCT00000026640.1	14,13,12,11,10,9,8	chr1:101176951-101178704|chr1:101199679-101201286
chr1	101178704	101203107	-	10	circRNA	ENSSSCT00000026640.1	14,13,12,11,10,9,8,7,6,5	chr1:101176951-101178704|chr1:101203107-101205441
chr1	101190050	101199679	-	4	circRNA	ENSSSCT00000026640.1	11,10,9,8	chr1:101186841-101190050|chr1:101199679-101201286
chr1	101190050	101210132	-	9	circRNA	ENSSSCT00000026640.1	11,10,9,8,7,6,5,4,3	chr1:101186841-101190050|chr1:101210132-101216206
chr1	101191387	101210132	-	8	circRNA	ENSSSCT00000026640.1	10,9,8,7,6,5,4,3	chr1:101190143-101191387|chr1:101210132-101216206
chr1	101199340	101203107	-	5	circRNA	ENSSSCT00000026640.1	9,8,7,6,5	chr1:101191510-101199340|chr1:101203107-101205441
chr1	101199340	101210132	-	7	circRNA	ENSSSCT00000026640.1	9,8,7,6,5,4,3	chr1:101191510-101199340|chr1:101210132-101216206
chr1	101205441	101210132	-	2	circRNA	ENSSSCT00000026640.1	4,3	chr1:101203107-101205441|chr1:101210132-101216206
chr1	101627932	101630402	+	3	circRNA	ENSSSCT00000004949.2	3,4,5	chr1:101586356-101627932|chr1:101630402-101634812
chr1	101848831	101856904	+	5	circRNA	ENSSSCT00000004955.2	6,7,8,9,10	chr1:101848069-101848831|chr1:101856904-101858458
chr1	103173036	103183452	-	6	circRNA	ENSSSCT00000035901.1	23,22,21,20,19,18	chr1:103156632-103173036|chr1:103183452-103188265
chr1	103173036	103189241	-	8	circRNA	ENSSSCT00000035901.1	23,22,21,20,19,18,17,16	chr1:103156632-103173036|chr1:103189241-103206285
chr1	103173036	103215801	-	16	circRNA	ENSSSCT00000035901.1	23,22,21,20,19,18,17,16,15,14,13,12,11,10,9,8	chr1:103156632-103173036|chr1:103215801-103226187
chr1	103176718	103215268	-	14	circRNA	ENSSSCT00000035901.1	22,21,20,19,18,17,16,15,14,13,12,11,10,9	chr1:103173213-103176718|chr1:103215268-103215704
chr1	103177828	103182355	-	3	circRNA	ENSSSCT00000035901.1	21,20,19	chr1:103176863-103177828|chr1:103182355-103183310
chr1	103188265	103209709	-	4	circRNA	ENSSSCT00000035901.1	17,16,15,14	chr1:103183452-103188265|chr1:103209709-103210077
chr1	103188265	103215801	-	10	circRNA	ENSSSCT00000035901.1	17,16,15,14,13,12,11,10,9,8	chr1:103183452-103188265|chr1:103215801-103226187
chr1	103188265	103261556	-	15	circRNA	ENSSSCT00000035901.1	17,16,15,14,13,12,11,10,9,8,7,6,5,4,3	chr1:103183452-103188265|chr1:103261556-103290493
chr1	103189166	103209709	-	3	circRNA	ENSSSCT00000035901.1	16,15,14	chr1:103188326-103189166|chr1:103209709-103210077
chr1	103206285	103215801	-	8	circRNA	ENSSSCT00000035901.1	15,14,13,12,11,10,9,8	chr1:103189241-103206285|chr1:103215801-103226187
chr1	103214078	103215801	-	3	circRNA	ENSSSCT00000035901.1	10,9,8	chr1:103211324-103214078|chr1:103215801-103226187
chr1	103215126	103215801	-	2	circRNA	ENSSSCT00000035901.1	9,8	chr1:103214188-103215126|chr1:103215801-103226187
chr1	103248558	103261556	-	3	circRNA	ENSSSCT00000035901.1	5,4,3	chr1:103230210-103248558|chr1:103261556-103290493
chr1	103254747	103261556	-	2	circRNA	ENSSSCT00000035901.1	4,3	chr1:103248684-103254747|chr1:103261556-103290493
chr1	103254747	103290666	-	3	circRNA	ENSSSCT00000035901.1	4,3,2	chr1:103248684-103254747|chr1:103290666-103291938
chr1	103352119	103365781	+	4	circRNA	ENSSSCT00000004957.2	4,5,6,7	chr1:103349547-103352119|chr1:103365781-103370134
chr1	103475506	103477380	+	6	circRNA	ENSSSCT00000004960.2	2,3,4,5,6,7	chr1:103474823-103475506|chr1:103477380-103477480
chr1	103476561	103476712	+	1	circRNA	ENSSSCT00000004960.2	5	chr1:103476478-103476561|chr1:103476712-103476800
chr1	103504054	103509525	-	2	circRNA	ENSSSCT00000004958.2	11,10	chr1:103500561-103504054|chr1:103509525-103510423
chr1	103504054	103513105	-	7	circRNA	ENSSSCT00000004958.2	11,10,9,8,7,6,5	chr1:103500561-103504054|chr1:103513105-103515150
chr1	103504054	103515440	-	8	circRNA	ENSSSCT00000004958.2	11,10,9,8,7,6,5,4	chr1:103500561-103504054|chr1:103515440-103520243
chr1	103509406	103513105	-	6	circRNA	ENSSSCT00000004958.2	10,9,8,7,6,5	chr1:103504215-103509406|chr1:103513105-103515150
chr1	103510423	103515440	-	6	circRNA	ENSSSCT00000004958.2	9,8,7,6,5,4	chr1:103509525-103510423|chr1:103515440-103520243
chr1	103512706	103513105	-	2	circRNA	ENSSSCT00000004958.2	6,5	chr1:103512177-103512706|chr1:103513105-103515150
chr1	103512706	103520361	-	4	circRNA	ENSSSCT00000004958.2	6,5,4,3	chr1:103512177-103512706|chr1:103520361-103520696
chr1	103515150	103520361	-	2	circRNA	ENSSSCT00000004958.2	4,3	chr1:103513105-103515150|chr1:103520361-103520696
chr1	104402848	104406306	+	2	circRNA	ENSSSCT00000004961.1	1,2	None|chr1:104406306-104481702
chr1	105560396	105562500	-	2	circRNA	ENSSSCT00000004965.2	15,14	chr1:105558475-105560396|chr1:105562500-105563011
chr1	105716717	105726014	-	5	circRNA	ENSSSCT00000027237.1	16,15,14,13,12	chr1:105714946-105716717|chr1:105726014-105727190
chr1	105725847	105730265	-	5	circRNA	ENSSSCT00000027237.1	12,11,10,9,8	chr1:105725025-105725847|chr1:105730265-105737816
chr1	105756427	105757474	-	2	circRNA	ENSSSCT00000027237.1	6,5	chr1:105737957-105756427|chr1:105757474-105764293
chr1	105756427	105766861	-	4	circRNA	ENSSSCT00000027237.1	6,5,4,3	chr1:105737957-105756427|chr1:105766861-105769145
chr1	105756698	105757354	-	1	ciRNA	ENSSSCT00000027237.1	5	chr1:105756687-105757354
chr1	105816268	105820578	-	4	circRNA	ENSSSCT00000004968.2	13,12,11,10	chr1:105812196-105816268|chr1:105820578-105821933
chr1	105816268	105822032	-	5	circRNA	ENSSSCT00000004968.2	13,12,11,10,9	chr1:105812196-105816268|chr1:105822032-105824257
chr1	105816268	105825247	-	7	circRNA	ENSSSCT00000004968.2	13,12,11,10,9,8,7	chr1:105812196-105816268|chr1:105825247-105826249
chr1	105820481	105840446	-	7	circRNA	ENSSSCT00000004968.2	10,9,8,7,6,5,4	chr1:105820003-105820481|chr1:105840446-105842660
chr1	105833833	105842695	-	3	circRNA	ENSSSCT00000004968.2	5,4,3	chr1:105826348-105833833|chr1:105842695-105854519
chr1	105833833	105854597	-	4	circRNA	ENSSSCT00000004968.2	5,4,3,2	chr1:105826348-105833833|chr1:105854597-105870631
chr1	105923806	105926380	-	4	circRNA	ENSSSCT00000004969.2	8,7,6,5	chr1:105920019-105923806|chr1:105926380-105927963
chr1	105923806	105930130	-	6	circRNA	ENSSSCT00000004969.2	8,7,6,5,4,3	chr1:105920019-105923806|chr1:105930130-105936964
chr1	105926256	105930130	-	3	circRNA	ENSSSCT00000004969.2	5,4,3	chr1:105925584-105926256|chr1:105930130-105936964
chr1	105927963	105930130	-	2	circRNA	ENSSSCT00000004969.2	4,3	chr1:105926380-105927963|chr1:105930130-105936964
chr1	105947102	105950799	+	4	circRNA	ENSSSCT00000004971.1	2,3,4,5	chr1:105944384-105947102|chr1:105950799-105951341
chr1	105950019	105950799	+	3	circRNA	ENSSSCT00000004971.1	3,4,5	chr1:105947272-105950019|chr1:105950799-105951341
chr1	105950019	105951833	+	5	circRNA	ENSSSCT00000004971.1	3,4,5,6,7	chr1:105947272-105950019|chr1:105951833-105954319
chr1	105950650	105954427	+	4	circRNA	ENSSSCT00000004971.1	5,6,7,8	chr1:105950448-105950650|chr1:105954427-105954546
chr1	105951341	105951833	+	2	circRNA	ENSSSCT00000004971.1	6,7	chr1:105950799-105951341|chr1:105951833-105954319
chr1	106906244	106906722	-	2	circRNA	ENSSSCT00000004977.2	9,8	chr1:106901588-106906244|chr1:106906722-106909899
chr1	106924969	106964621	-	4	circRNA	ENSSSCT00000004977.2	5,4,3,2	chr1:106911410-106924969|chr1:106964621-106990983
chr1	107795203	107808698	+	2	circRNA	ENSSSCT00000004978.2	2,3	chr1:107666721-107795203|chr1:107808698-107826614
chr1	107808626	107827885	+	3	circRNA	ENSSSCT00000004978.2	3,4,5	chr1:107795405-107808626|chr1:107827885-107834984
chr1	107808626	107835060	+	4	circRNA	ENSSSCT00000004978.2	3,4,5,6	chr1:107795405-107808626|chr1:107835060-107885623
chr1	107826614	107835060	+	3	circRNA	ENSSSCT00000004978.2	4,5,6	chr1:107808698-107826614|chr1:107835060-107885623
chr1	107826614	107885700	+	4	circRNA	ENSSSCT00000004978.2	4,5,6,7	chr1:107808698-107826614|chr1:107885700-107929919
chr1	107826614	107985266	+	7	circRNA	ENSSSCT00000004978.2	4,5,6,7,8,9,10	chr1:107808698-107826614|chr1:107985266-108025157
chr1	107834984	107985266	+	5	circRNA	ENSSSCT00000004978.2	6,7,8,9,10	chr1:107827885-107834984|chr1:107985266-108025157
chr1	107885623	107985266	+	4	circRNA	ENSSSCT00000004978.2	7,8,9,10	chr1:107835060-107885623|chr1:107985266-108025157
chr1	107929919	107933933	+	2	circRNA	ENSSSCT00000004978.2	8,9	chr1:107885700-107929919|chr1:107933933-107985110
chr1	107933633	107933933	+	1	circRNA	ENSSSCT00000004978.2	9	chr1:107930412-107933633|chr1:107933933-107985110
chr1	107933633	107985266	+	2	circRNA	ENSSSCT00000004978.2	9,10	chr1:107930412-107933633|chr1:107985266-108025157
chr1	108283320	108300266	-	2	circRNA	ENSSSCT00000004980.2	3,2	chr1:108217303-108283320|chr1:108300266-108352107
chr1	108448291	108449328	-	2	circRNA	ENSSSCT00000027450.1	7,6	chr1:108447606-108448291|chr1:108449328-108449556
chr1	108448291	108449692	-	4	circRNA	ENSSSCT00000027450.1	7,6,5,4	chr1:108447606-108448291|chr1:108449692-108450431
chr1	108642295	108644554	+	2	circRNA	ENSSSCT00000004981.2	2,3	chr1:108638853-108642295|chr1:108644554-108645838
chr1	109542308	109542400	-	1	ciRNA	ENSSSCT00000004987.2	2	chr1:109541905-109542400
chr1	109666586	109674082	+	3	circRNA	ENSSSCT00000004990.2	2,3,4	chr1:109665657-109666586|chr1:109674082-109677357
chr1	109670823	109677495	+	3	circRNA	ENSSSCT00000004990.2	3,4,5	chr1:109666685-109670823|chr1:109677495-109731441
chr1	110340581	110355323	+	3	circRNA	ENSSSCT00000004994.2	2,3,4	chr1:110333341-110340581|chr1:110355323-110357458
chr1	110340581	110363821	+	9	circRNA	ENSSSCT00000004994.2	2,3,4,5,6,7,8,9,10	chr1:110333341-110340581|chr1:110363821-110390670
chr1	110363115	110393162	+	5	circRNA	ENSSSCT00000004994.2	8,9,10,11,12	chr1:110360011-110363115|chr1:110393162-110399204
chr1	110525007	110526648	+	2	circRNA	ENSSSCT00000004997.1	2,3	chr1:110509499-110525007|chr1:110526648-110527368
chr1	110525007	110527398	+	3	circRNA	ENSSSCT00000004997.1	2,3,4	chr1:110509499-110525007|chr1:110527398-110532619
chr1	110525007	110532832	+	4	circRNA	ENSSSCT00000004997.1	2,3,4,5	chr1:110509499-110525007|chr1:110532832-110536582
chr1	110525007	110538400	+	7	circRNA	ENSSSCT00000004997.1	2,3,4,5,6,7,8	chr1:110509499-110525007|chr1:110538400-110546990
chr1	110525007	110548336	+	9	circRNA	ENSSSCT00000004997.1	2,3,4,5,6,7,8,9,10	chr1:110509499-110525007|chr1:110548336-110560014
chr1	110525007	110560153	+	10	circRNA	ENSSSCT00000004997.1	2,3,4,5,6,7,8,9,10,11	chr1:110509499-110525007|chr1:110560153-110561660
chr1	110526473	110532832	+	3	circRNA	ENSSSCT00000004997.1	3,4,5	chr1:110525385-110526473|chr1:110532832-110536582
chr1	110526473	110548336	+	8	circRNA	ENSSSCT00000004997.1	3,4,5,6,7,8,9,10	chr1:110525385-110526473|chr1:110548336-110560014
chr1	110527368	110538400	+	5	circRNA	ENSSSCT00000004997.1	4,5,6,7,8	chr1:110526648-110527368|chr1:110538400-110546990
chr1	110527368	110548336	+	7	circRNA	ENSSSCT00000004997.1	4,5,6,7,8,9,10	chr1:110526648-110527368|chr1:110548336-110560014
chr1	110532619	110538400	+	4	circRNA	ENSSSCT00000004997.1	5,6,7,8	chr1:110527398-110532619|chr1:110538400-110546990
chr1	110532619	110548336	+	6	circRNA	ENSSSCT00000004997.1	5,6,7,8,9,10	chr1:110527398-110532619|chr1:110548336-110560014
chr1	110536582	110548336	+	5	circRNA	ENSSSCT00000004997.1	6,7,8,9,10	chr1:110532832-110536582|chr1:110548336-110560014
chr1	113957631	113959372	-	2	circRNA	ENSSSCT00000005002.2	7,6	chr1:113952260-113957631|chr1:113959372-114031438
chr1	113957631	114049837	-	4	circRNA	ENSSSCT00000005002.2	7,6,5,4	chr1:113952260-113957631|chr1:114049837-114063334
chr1	114031438	114049837	-	2	circRNA	ENSSSCT00000005002.2	5,4	chr1:113959372-114031438|chr1:114049837-114063334
chr1	114106973	114121891	+	13	circRNA	ENSSSCT00000005003.2	2,3,4,5,6,7,8,9,10,11,12,13,14	chr1:114105579-114106973|chr1:114121891-114123744
chr1	114109374	114115544	+	10	circRNA	ENSSSCT00000005003.2	3,4,5,6,7,8,9,10,11,12	chr1:114107096-114109374|chr1:114115544-114116883
chr1	114109374	114116975	+	11	circRNA	ENSSSCT00000005003.2	3,4,5,6,7,8,9,10,11,12,13	chr1:114107096-114109374|chr1:114116975-114121760
chr1	114109374	114121891	+	12	circRNA	ENSSSCT00000005003.2	3,4,5,6,7,8,9,10,11,12,13,14	chr1:114107096-114109374|chr1:114121891-114123744
chr1	114173835	114184187	+	5	circRNA	ENSSSCT00000005005.2	4,5,6,7,8	chr1:114172770-114173835|chr1:114184187-114190334
chr1	114174957	114182629	+	3	circRNA	ENSSSCT00000005005.2	5,6,7	chr1:114174618-114174957|chr1:114182629-114184116
chr1	114174957	114184187	+	4	circRNA	ENSSSCT00000005005.2	5,6,7,8	chr1:114174618-114174957|chr1:114184187-114190334
chr1	114742248	114744126	+	2	circRNA	ENSSSCT00000005007.2	2,3	chr1:114694018-114742248|chr1:114744126-114749383
chr1	115163044	115173093	-	3	circRNA	ENSSSCT00000036325.1	4,3,2	chr1:115154567-115163044|chr1:115173093-115214775
chr1	116730738	116747484	-	5	circRNA	ENSSSCT00000005011.2	7,6,5,4,3	chr1:116724230-116730738|chr1:116747484-116748901
chr1	116733952	116747484	-	4	circRNA	ENSSSCT00000005011.2	6,5,4,3	chr1:116730843-116733952|chr1:116747484-116748901
chr1	116733952	116748998	-	5	circRNA	ENSSSCT00000005011.2	6,5,4,3,2	chr1:116730843-116733952|chr1:116748998-116763101
chr1	116736712	116747484	-	3	circRNA	ENSSSCT00000005011.2	5,4,3	chr1:116734125-116736712|chr1:116747484-116748901
chr1	116736712	116748998	-	4	circRNA	ENSSSCT00000005011.2	5,4,3,2	chr1:116734125-116736712|chr1:116748998-116763101
chr1	116747310	116748998	-	2	circRNA	ENSSSCT00000005011.2	3,2	chr1:116738139-116747310|chr1:116748998-116763101
chr1	116818564	116842031	+	11	circRNA	ENSSSCT00000005012.2	3,4,5,6,7,8,9,10,11,12,13	chr1:116808368-116818564|chr1:116842031-116864407
chr1	116834275	116842031	+	5	circRNA	ENSSSCT00000005012.2	9,10,11,12,13	chr1:116832600-116834275|chr1:116842031-116864407
chr1	116864407	116900708	+	4	circRNA	ENSSSCT00000005012.2	14,15,16,17	chr1:116842031-116864407|chr1:116900708-116917749
chr1	116898187	116900708	+	2	circRNA	ENSSSCT00000005012.2	16,17	chr1:116875246-116898187|chr1:116900708-116917749
chr1	117474207	117481216	-	3	circRNA	ENSSSCT00000005016.2	6,5,4	chr1:117470832-117474207|chr1:117481216-117485460
chr1	117494796	117498416	+	5	circRNA	ENSSSCT00000005017.2	2,3,4,5,6	chr1:117493777-117494796|chr1:117498416-117499905
chr1	117496937	117498416	+	4	circRNA	ENSSSCT00000005017.2	3,4,5,6	chr1:117494879-117496937|chr1:117498416-117499905
chr1	117496937	117505576	+	10	circRNA	ENSSSCT00000005017.2	3,4,5,6,7,8,9,10,11,12	chr1:117494879-117496937|chr1:117505576-117508016
chr1	117496937	117508579	+	12	circRNA	ENSSSCT00000005017.2	3,4,5,6,7,8,9,10,11,12,13,14	chr1:117494879-117496937|chr1:117508579-117509350
chr1	117499905	117504177	+	4	circRNA	ENSSSCT00000005017.2	7,8,9,10	chr1:117498416-117499905|chr1:117504177-117504415
chr1	117503664	117504551	+	3	circRNA	ENSSSCT00000005017.2	9,10,11	chr1:117502286-117503664|chr1:117504551-117505462
chr1	117504415	117505576	+	2	circRNA	ENSSSCT00000005017.2	11,12	chr1:117504177-117504415|chr1:117505576-117508016
chr1	117504415	117508579	+	4	circRNA	ENSSSCT00000005017.2	11,12,13,14	chr1:117504177-117504415|chr1:117508579-117509350
chr1	117505462	117508579	+	3	circRNA	ENSSSCT00000005017.2	12,13,14	chr1:117504551-117505462|chr1:117508579-117509350
chr1	117679964	117689652	+	3	circRNA	ENSSSCT00000005019.2	2,3,4	chr1:117676043-117679964|chr1:117689652-117692019
chr1	117679964	117695600	+	6	circRNA	ENSSSCT00000005019.2	2,3,4,5,6,7	chr1:117676043-117679964|chr1:117695600-117698160
chr1	117692019	117694657	+	2	circRNA	ENSSSCT00000005019.2	5,6	chr1:117689652-117692019|chr1:117694657-117695492
chr1	117692019	117695600	+	3	circRNA	ENSSSCT00000005019.2	5,6,7	chr1:117689652-117692019|chr1:117695600-117698160
chr1	118180631	118184320	-	2	circRNA	ENSSSCT00000005027.2	5,4	chr1:118179591-118180631|chr1:118184320-118245773
chr1	118377838	118378712	-	1	circRNA	ENSSSCT00000005027.2	2	chr1:118245999-118377838|chr1:118378712-118408695
chr1	118422478	118445673	-	4	circRNA	ENSSSCT00000005028.2	18,17,16,15	chr1:118414553-118422478|chr1:118445673-118453312
chr1	118441846	118445673	-	3	circRNA	ENSSSCT00000005028.2	17,16,15	chr1:118422581-118441846|chr1:118445673-118453312
chr1	118441846	118453439	-	4	circRNA	ENSSSCT00000005028.2	17,16,15,14	chr1:118422581-118441846|chr1:118453439-118456304
chr1	118441846	118456520	-	5	circRNA	ENSSSCT00000005028.2	17,16,15,14,13	chr1:118422581-118441846|chr1:118456520-118459647
chr1	118441846	118519307	-	15	circRNA	ENSSSCT00000005028.2	17,16,15,14,13,12,11,10,9,8,7,6,5,4,3	chr1:118422581-118441846|chr1:118519307-118522763
chr1	118453312	118519307	-	12	circRNA	ENSSSCT00000005028.2	14,13,12,11,10,9,8,7,6,5,4,3	chr1:118445673-118453312|chr1:118519307-118522763
chr1	118456304	118519307	-	11	circRNA	ENSSSCT00000005028.2	13,12,11,10,9,8,7,6,5,4,3	chr1:118453439-118456304|chr1:118519307-118522763
chr1	118750717	118761148	+	6	circRNA	ENSSSCT00000005035.2	3,4,5,6,7,8	chr1:118717512-118750717|chr1:118761148-118775227
chr1	118757747	118761148	+	4	circRNA	ENSSSCT00000005035.2	5,6,7,8	chr1:118752880-118757747|chr1:118761148-118775227
chr1	118801083	118801117	+	1	ciRNA	ENSSSCT00000005034.2	1	chr1:118801083-118801789
chr1	118820959	118822199	+	2	circRNA	ENSSSCT00000005033.2	2,3	chr1:118816918-118820959|chr1:118822199-118826433
chr1	118822132	118829734	+	5	circRNA	ENSSSCT00000005033.2	3,4,5,6,7	chr1:118821087-118822132|chr1:118829734-118831792
chr1	118835828	118837146	+	3	circRNA	ENSSSCT00000005033.2	11,12,13	chr1:118833466-118835828|chr1:118837146-118837723
chr1	118997320	118997601	-	2	circRNA	ENSSSCT00000028843.1	12,11	chr1:118994092-118997320|chr1:118997601-119009635
chr1	119010711	119044819	-	9	circRNA	ENSSSCT00000028843.1	9,8,7,6,5,4,3,2,1	chr1:119009681-119010711|None
chr1	119413773	119424419	+	4	circRNA	ENSSSCT00000005038.2	2,3,4,5	chr1:119406090-119413773|chr1:119424419-119425469
chr1	119413773	119431089	+	10	circRNA	ENSSSCT00000005038.2	2,3,4,5,6,7,8,9,10,11	chr1:119406090-119413773|chr1:119431089-119436508
chr1	119413773	119443755	+	15	circRNA	ENSSSCT00000005038.2	2,3,4,5,6,7,8,9,10,11,12,13,14,15,16	chr1:119406090-119413773|chr1:119443755-119447394
chr1	119419775	119427060	+	5	circRNA	ENSSSCT00000005038.2	3,4,5,6,7	chr1:119413869-119419775|chr1:119427060-119428734
chr1	119424322	119464400	+	20	circRNA	ENSSSCT00000005038.2	5,6,7,8,9,10,11,12,13,14,15,16,17,18,19,20,21,22,23,24	chr1:119421729-119424322|chr1:119464400-119472302
chr1	119425469	119443755	+	11	circRNA	ENSSSCT00000005038.2	6,7,8,9,10,11,12,13,14,15,16	chr1:119424419-119425469|chr1:119443755-119447394
chr1	119447394	119456538	+	5	circRNA	ENSSSCT00000005038.2	17,18,19,20,21	chr1:119443755-119447394|chr1:119456538-119458851
chr1	119450347	119456538	+	4	circRNA	ENSSSCT00000005038.2	18,19,20,21	chr1:119447616-119450347|chr1:119456538-119458851
chr1	119454265	119464400	+	6	circRNA	ENSSSCT00000005038.2	19,20,21,22,23,24	chr1:119450521-119454265|chr1:119464400-119472302
chr1	119484767	119485168	+	2	circRNA	ENSSSCT00000005038.2	32,33	chr1:119482711-119484767|chr1:119485168-119491752
chr1	119484991	119492448	+	3	circRNA	ENSSSCT00000005038.2	33,34,35	chr1:119484878-119484991|chr1:119492448-119494563
chr1	119511529	119527500	+	15	circRNA	ENSSSCT00000005038.2	41,42,43,44,45,46,47,48,49,50,51,52,53,54,55	chr1:119502660-119511529|chr1:119527500-119530688
chr1	119524203	119530888	+	5	circRNA	ENSSSCT00000005038.2	52,53,54,55,56	chr1:119523170-119524203|chr1:119530888-119531556
chr1	119541594	119542601	+	2	circRNA	ENSSSCT00000005038.2	66,67	chr1:119540622-119541594|chr1:119542601-119543925
chr1	119589317	119598313	+	5	circRNA	ENSSSCT00000005040.2	2,3,4,5,6	chr1:119588510-119589317|chr1:119598313-119606492
chr1	120219313	120221794	-	4	circRNA	ENSSSCT00000005049.2	9,8,7,6	chr1:120217302-120219313|chr1:120221794-120222575
chr1	120219576	120220839	-	1	ciRNA	ENSSSCT00000005049.2	8	chr1:120219392-120220839
chr1	120219577	120220839	-	1	ciRNA	ENSSSCT00000005049.2	8	chr1:120219392-120220839
chr1	120219578	120220839	-	1	ciRNA	ENSSSCT00000005049.2	8	chr1:120219392-120220839
chr1	120219580	120220839	-	1	ciRNA	ENSSSCT00000005049.2	8	chr1:120219392-120220839
chr1	120219582	120220839	-	1	ciRNA	ENSSSCT00000005049.2	8	chr1:120219392-120220839
chr1	120219584	120220839	-	1	ciRNA	ENSSSCT00000005049.2	8	chr1:120219392-120220839
chr1	120219593	120220839	-	1	ciRNA	ENSSSCT00000005049.2	8	chr1:120219392-120220839
chr1	120220839	120221260	-	2	circRNA	ENSSSCT00000005049.2	8,7	chr1:120219392-120220839|chr1:120221260-120221718
chr1	120220839	120221794	-	3	circRNA	ENSSSCT00000005049.2	8,7,6	chr1:120219392-120220839|chr1:120221794-120222575
chr1	120220839	120226027	-	6	circRNA	ENSSSCT00000005049.2	8,7,6,5,4,3	chr1:120219392-120220839|chr1:120226027-120238753
chr1	120221850	120222575	-	1	ciRNA	ENSSSCT00000005049.2	5	chr1:120221794-120222575
chr1	120222575	120226027	-	3	circRNA	ENSSSCT00000005049.2	5,4,3	chr1:120221794-120222575|chr1:120226027-120238753
chr1	120222575	120238879	-	4	circRNA	ENSSSCT00000005049.2	5,4,3,2	chr1:120221794-120222575|chr1:120238879-120239952
chr1	120627959	120630732	-	3	circRNA	ENSSSCT00000022839.1	4,3,2	chr1:120625949-120627959|chr1:120630732-120633170
chr1	121374838	121383134	+	4	circRNA	ENSSSCT00000031810.1	2,3,4,5	chr1:121361372-121374838|chr1:121383134-121391663
chr1	121497590	121499163	+	2	circRNA	ENSSSCT00000032472.1	5,6	chr1:121492511-121497590|chr1:121499163-121500192
chr1	121519781	121528110	+	3	circRNA	ENSSSCT00000028902.1	10,11,12	chr1:121514368-121519781|chr1:121528110-121528431
chr1	123230234	123236564	+	5	circRNA	ENSSSCT00000005055.2	11,12,13,14,15	chr1:123229642-123230234|chr1:123236564-123238350
chr1	123256030	123278014	+	8	circRNA	ENSSSCT00000005056.2	2,3,4,5,6,7,8,9	chr1:123255084-123256030|chr1:123278014-123284364
chr1	123275193	123278014	+	4	circRNA	ENSSSCT00000005056.2	6,7,8,9	chr1:123267776-123275193|chr1:123278014-123284364
chr1	123275193	123293376	+	7	circRNA	ENSSSCT00000005056.2	6,7,8,9,10,11,12	chr1:123267776-123275193|chr1:123293376-123314637
chr1	123277832	123316294	+	6	circRNA	ENSSSCT00000005056.2	9,10,11,12,13,14	chr1:123276897-123277832|chr1:123316294-123334510
chr1	123398064	123401996	+	2	circRNA	ENSSSCT00000034155.1	4,5	chr1:123383935-123398064|chr1:123401996-123405937
chr1	124307574	124309028	+	2	circRNA	ENSSSCT00000005062.2	2,3	chr1:124288413-124307574|chr1:124309028-124313390
chr1	124476238	124477250	-	1	ciRNA	ENSSSCT00000005064.2	7	chr1:124473628-124477250
chr1	124552796	124564439	-	4	circRNA	ENSSSCT00000005065.2	8,7,6,5	chr1:124548998-124552796|chr1:124564439-124579324
chr1	124600344	124601656	-	2	circRNA	ENSSSCT00000005065.2	3,2	chr1:124579443-124600344|chr1:124601656-124618795
chr1	124772985	124785165	+	3	circRNA	ENSSSCT00000005066.2	2,3,4	chr1:124676760-124772985|chr1:124785165-124801757
chr1	124785070	124806011	+	3	circRNA	ENSSSCT00000005066.2	4,5,6	chr1:124781997-124785070|chr1:124806011-124811204
chr1	124801757	124806011	+	2	circRNA	ENSSSCT00000005066.2	5,6	chr1:124785165-124801757|chr1:124806011-124811204
chr1	124801757	124811336	+	3	circRNA	ENSSSCT00000005066.2	5,6,7	chr1:124785165-124801757|chr1:124811336-124814760
chr1	124801757	124816635	+	5	circRNA	ENSSSCT00000005066.2	5,6,7,8,9	chr1:124785165-124801757|chr1:124816635-124822520
chr1	124811204	124816635	+	3	circRNA	ENSSSCT00000005066.2	7,8,9	chr1:124806011-124811204|chr1:124816635-124822520
chr1	124811204	124843460	+	11	circRNA	ENSSSCT00000005066.2	7,8,9,10,11,12,13,14,15,16,17	chr1:124806011-124811204|chr1:124843460-124850019
chr1	124811204	124864455	+	16	circRNA	ENSSSCT00000005066.2	7,8,9,10,11,12,13,14,15,16,17,18,19,20,21,22	chr1:124806011-124811204|chr1:124864455-124875217
chr1	124814760	124822717	+	3	circRNA	ENSSSCT00000005066.2	8,9,10	chr1:124811336-124814760|chr1:124822717-124826830
chr1	124814760	124827295	+	5	circRNA	ENSSSCT00000005066.2	8,9,10,11,12	chr1:124811336-124814760|chr1:124827295-124829849
chr1	124814760	124829936	+	6	circRNA	ENSSSCT00000005066.2	8,9,10,11,12,13	chr1:124811336-124814760|chr1:124829936-124831509
chr1	124814760	124835782	+	9	circRNA	ENSSSCT00000005066.2	8,9,10,11,12,13,14,15,16	chr1:124811336-124814760|chr1:124835782-124843353
chr1	124814760	124843460	+	10	circRNA	ENSSSCT00000005066.2	8,9,10,11,12,13,14,15,16,17	chr1:124811336-124814760|chr1:124843460-124850019
chr1	124822520	124843460	+	8	circRNA	ENSSSCT00000005066.2	10,11,12,13,14,15,16,17	chr1:124816635-124822520|chr1:124843460-124850019
chr1	124856765	124862227	+	3	circRNA	ENSSSCT00000005066.2	19,20,21	chr1:124850118-124856765|chr1:124862227-124864309
chr1	124856765	124864455	+	4	circRNA	ENSSSCT00000005066.2	19,20,21,22	chr1:124850118-124856765|chr1:124864455-124875217
chr1	124861733	124862227	+	2	circRNA	ENSSSCT00000005066.2	20,21	chr1:124856910-124861733|chr1:124862227-124864309
chr1	124861733	124875364	+	4	circRNA	ENSSSCT00000005066.2	20,21,22,23	chr1:124856910-124861733|chr1:124875364-124877453
chr1	124861733	124877611	+	5	circRNA	ENSSSCT00000005066.2	20,21,22,23,24	chr1:124856910-124861733|chr1:124877611-124880331
chr1	124861733	124884580	+	7	circRNA	ENSSSCT00000005066.2	20,21,22,23,24,25,26	chr1:124856910-124861733|chr1:124884580-124895662
chr1	124875217	124884580	+	4	circRNA	ENSSSCT00000005066.2	23,24,25,26	chr1:124864455-124875217|chr1:124884580-124895662
chr1	124875217	124895832	+	5	circRNA	ENSSSCT00000005066.2	23,24,25,26,27	chr1:124864455-124875217|chr1:124895832-124900415
chr1	124880331	124884580	+	2	circRNA	ENSSSCT00000005066.2	25,26	chr1:124877611-124880331|chr1:124884580-124895662
chr1	124924404	124928296	-	4	circRNA	ENSSSCT00000005069.2	8,7,6,5	chr1:124910940-124924404|chr1:124928296-124933558
chr1	124973703	124974989	-	2	circRNA	ENSSSCT00000005070.2	10,9	chr1:124969383-124973703|chr1:124974989-124976890
chr1	124982099	124982358	-	1	circRNA	ENSSSCT00000005070.2	7	chr1:124977239-124982099|chr1:124982358-124986332
chr1	124986332	124988911	-	2	circRNA	ENSSSCT00000005070.2	6,5	chr1:124982358-124986332|chr1:124988911-124991855
chr1	124986332	124992019	-	3	circRNA	ENSSSCT00000005070.2	6,5,4	chr1:124982358-124986332|chr1:124992019-124997044
chr1	124988716	125013992	-	4	circRNA	ENSSSCT00000005070.2	5,4,3,2	chr1:124986658-124988716|chr1:125013992-125109131
chr1	124997044	125013992	-	2	circRNA	ENSSSCT00000005070.2	3,2	chr1:124992019-124997044|chr1:125013992-125109131
chr1	125013096	125013992	-	1	circRNA	ENSSSCT00000005070.2	2	chr1:124997171-125013096|chr1:125013992-125109131
chr1	125143607	125147013	+	2	circRNA	ENSSSCT00000005073.2	3,4	chr1:125134109-125143607|chr1:125147013-125147877
chr1	125143607	125147925	+	3	circRNA	ENSSSCT00000005073.2	3,4,5	chr1:125134109-125143607|chr1:125147925-125156965
chr1	125143607	125159485	+	6	circRNA	ENSSSCT00000005073.2	3,4,5,6,7,8	chr1:125134109-125143607|chr1:125159485-125161895
chr1	125143607	125162014	+	7	circRNA	ENSSSCT00000005073.2	3,4,5,6,7,8,9	chr1:125134109-125143607|chr1:125162014-125165716
chr1	125146815	125147925	+	2	circRNA	ENSSSCT00000005073.2	4,5	chr1:125143672-125146815|chr1:125147925-125156965
chr1	125161895	125165866	+	2	circRNA	ENSSSCT00000005073.2	9,10	chr1:125159485-125161895|chr1:125165866-125166357
chr1	125216285	125219611	-	3	circRNA	ENSSSCT00000005071.2	6,5,4	chr1:125213303-125216285|chr1:125219611-125221101
chr1	125219031	125219611	-	2	circRNA	ENSSSCT00000005071.2	5,4	chr1:125216446-125219031|chr1:125219611-125221101
chr1	125506808	125517917	-	9	circRNA	ENSSSCT00000005076.2	10,9,8,7,6,5,4,3,2	chr1:125499226-125506808|chr1:125517917-125527218
chr1	126461854	126463730	-	2	circRNA	ENSSSCT00000005079.2	12,11	chr1:126440951-126461854|chr1:126463730-126468164
chr1	126849304	126928380	-	6	circRNA	ENSSSCT00000005081.2	18,17,16,15,14,13	chr1:126846074-126849304|chr1:126928380-126936875
chr1	126865306	126928380	-	3	circRNA	ENSSSCT00000005081.2	15,14,13	chr1:126863930-126865306|chr1:126928380-126936875
chr1	126926295	126928380	-	2	circRNA	ENSSSCT00000005081.2	14,13	chr1:126865421-126926295|chr1:126928380-126936875
chr1	126926295	126936954	-	3	circRNA	ENSSSCT00000005081.2	14,13,12	chr1:126865421-126926295|chr1:126936954-126947680
chr1	126926295	126948555	-	5	circRNA	ENSSSCT00000005081.2	14,13,12,11,10	chr1:126865421-126926295|chr1:126948555-126948828
chr1	126926295	126950090	-	7	circRNA	ENSSSCT00000005081.2	14,13,12,11,10,9,8	chr1:126865421-126926295|chr1:126950090-127003938
chr1	126926295	127034721	-	10	circRNA	ENSSSCT00000005081.2	14,13,12,11,10,9,8,7,6,5	chr1:126865421-126926295|chr1:127034721-127113151
chr1	126936875	126950090	-	5	circRNA	ENSSSCT00000005081.2	12,11,10,9,8	chr1:126928380-126936875|chr1:126950090-127003938
chr1	126947680	126950090	-	4	circRNA	ENSSSCT00000005081.2	11,10,9,8	chr1:126936954-126947680|chr1:126950090-127003938
chr1	127003938	127034721	-	3	circRNA	ENSSSCT00000005081.2	7,6,5	chr1:126950090-127003938|chr1:127034721-127113151
chr1	127003938	127147715	-	5	circRNA	ENSSSCT00000005081.2	7,6,5,4,3	chr1:126950090-127003938|chr1:127147715-127286294
chr1	127113151	127147715	-	2	circRNA	ENSSSCT00000005081.2	4,3	chr1:127034721-127113151|chr1:127147715-127286294
chr1	127622339	127628063	+	3	circRNA	ENSSSCT00000028724.1	2,3,4	chr1:127598157-127622339|chr1:127628063-127637223
chr1	127622339	127637341	+	4	circRNA	ENSSSCT00000028724.1	2,3,4,5	chr1:127598157-127622339|chr1:127637341-127641288
chr1	127622339	127641705	+	6	circRNA	ENSSSCT00000028724.1	2,3,4,5,6,7	chr1:127598157-127622339|chr1:127641705-127648622
chr1	127622339	127695635	+	17	circRNA	ENSSSCT00000028724.1	2,3,4,5,6,7,8,9,10,11,12,13,14,15,16,17,18	chr1:127598157-127622339|chr1:127695635-127715923
chr1	127627760	127641705	+	5	circRNA	ENSSSCT00000028724.1	3,4,5,6,7	chr1:127622486-127627760|chr1:127641705-127648622
chr1	127637223	127654960	+	7	circRNA	ENSSSCT00000028724.1	5,6,7,8,9,10,11	chr1:127628063-127637223|chr1:127654960-127661207
chr1	127637223	127676835	+	13	circRNA	ENSSSCT00000028724.1	5,6,7,8,9,10,11,12,13,14,15,16,17	chr1:127628063-127637223|chr1:127676835-127695589
chr1	127641288	127641705	+	2	circRNA	ENSSSCT00000028724.1	6,7	chr1:127637341-127641288|chr1:127641705-127648622
chr1	127641288	127695635	+	13	circRNA	ENSSSCT00000028724.1	6,7,8,9,10,11,12,13,14,15,16,17,18	chr1:127637341-127641288|chr1:127695635-127715923
chr1	127648622	127652412	+	2	circRNA	ENSSSCT00000028724.1	8,9	chr1:127641705-127648622|chr1:127652412-127653473
chr1	127648622	127654960	+	4	circRNA	ENSSSCT00000028724.1	8,9,10,11	chr1:127641705-127648622|chr1:127654960-127661207
chr1	127648622	127695635	+	11	circRNA	ENSSSCT00000028724.1	8,9,10,11,12,13,14,15,16,17,18	chr1:127641705-127648622|chr1:127695635-127715923
chr1	127652254	127653574	+	2	circRNA	ENSSSCT00000028724.1	9,10	chr1:127648846-127652254|chr1:127653574-127654813
chr1	127652254	127664089	+	6	circRNA	ENSSSCT00000028724.1	9,10,11,12,13,14	chr1:127648846-127652254|chr1:127664089-127670779
chr1	127661207	127670842	+	4	circRNA	ENSSSCT00000028724.1	12,13,14,15	chr1:127654960-127661207|chr1:127670842-127676531
chr1	127972024	128030115	-	7	circRNA	ENSSSCT00000005083.2	11,10,9,8,7,6,5	chr1:127971386-127972024|chr1:128030115-128038365
chr1	127997792	127997927	-	1	circRNA	ENSSSCT00000005083.2	10	chr1:127972159-127997792|chr1:127997927-128019977
chr1	127997792	128023881	-	4	circRNA	ENSSSCT00000005083.2	10,9,8,7	chr1:127972159-127997792|chr1:128023881-128029231
chr1	127997792	128030115	-	6	circRNA	ENSSSCT00000005083.2	10,9,8,7,6,5	chr1:127972159-127997792|chr1:128030115-128038365
chr1	127997792	128040020	-	8	circRNA	ENSSSCT00000005083.2	10,9,8,7,6,5,4,3	chr1:127972159-127997792|chr1:128040020-128052200
chr1	128019977	128023881	-	3	circRNA	ENSSSCT00000005083.2	9,8,7	chr1:127997927-128019977|chr1:128023881-128029231
chr1	128019977	128030115	-	5	circRNA	ENSSSCT00000005083.2	9,8,7,6,5	chr1:127997927-128019977|chr1:128030115-128038365
chr1	128019977	128040020	-	7	circRNA	ENSSSCT00000005083.2	9,8,7,6,5,4,3	chr1:127997927-128019977|chr1:128040020-128052200
chr1	128029231	128040020	-	4	circRNA	ENSSSCT00000005083.2	6,5,4,3	chr1:128023881-128029231|chr1:128040020-128052200
chr1	128375716	128379137	+	3	circRNA	ENSSSCT00000023283.1	2,3,4	chr1:128359844-128375716|chr1:128379137-128400587
chr1	132148097	132152573	+	4	circRNA	ENSSSCT00000005098.2	2,3,4,5	chr1:132090706-132148097|chr1:132152573-132155316
chr1	132148097	132158849	+	6	circRNA	ENSSSCT00000005098.2	2,3,4,5,6,7	chr1:132090706-132148097|chr1:132158849-132159872
chr1	132148097	132159987	+	7	circRNA	ENSSSCT00000005098.2	2,3,4,5,6,7,8	chr1:132090706-132148097|chr1:132159987-132171343
chr1	132148097	132171502	+	8	circRNA	ENSSSCT00000005098.2	2,3,4,5,6,7,8,9	chr1:132090706-132148097|chr1:132171502-132187454
chr1	132155316	132171502	+	4	circRNA	ENSSSCT00000005098.2	6,7,8,9	chr1:132152573-132155316|chr1:132171502-132187454
chr1	132315006	132319791	+	2	circRNA	ENSSSCT00000005103.2	2,3	chr1:132314396-132315006|chr1:132319791-132321664
chr1	132315006	132321809	+	3	circRNA	ENSSSCT00000005103.2	2,3,4	chr1:132314396-132315006|chr1:132321809-132338920
chr1	132315006	132367489	+	13	circRNA	ENSSSCT00000005103.2	2,3,4,5,6,7,8,9,10,11,12,13,14	chr1:132314396-132315006|chr1:132367489-132371885
chr1	132344009	132347527	+	3	circRNA	ENSSSCT00000005103.2	6,7,8	chr1:132339077-132344009|chr1:132347527-132349759
chr1	132344009	132356808	+	6	circRNA	ENSSSCT00000005103.2	6,7,8,9,10,11	chr1:132339077-132344009|chr1:132356808-132363138
chr1	132344009	132367489	+	9	circRNA	ENSSSCT00000005103.2	6,7,8,9,10,11,12,13,14	chr1:132339077-132344009|chr1:132367489-132371885
chr1	132344009	132380462	+	11	circRNA	ENSSSCT00000005103.2	6,7,8,9,10,11,12,13,14,15,16	chr1:132339077-132344009|chr1:132380462-132381592
chr1	132347419	132349866	+	2	circRNA	ENSSSCT00000005103.2	8,9	chr1:132346532-132347419|chr1:132349866-132355846
chr1	132441606	132453607	+	6	circRNA	ENSSSCT00000005103.2	37,38,39,40,41,42	chr1:132435370-132441606|chr1:132453607-132478953
chr1	132444598	132453607	+	5	circRNA	ENSSSCT00000005103.2	38,39,40,41,42	chr1:132441753-132444598|chr1:132453607-132478953
chr1	132819045	132825754	-	2	circRNA	ENSSSCT00000005107.2	5,4	chr1:132817828-132819045|chr1:132825754-132828552
chr1	132819271	132825589	-	1	ciRNA	ENSSSCT00000005107.2	4	chr1:132819247-132825589
chr1	132825589	132830751	-	3	circRNA	ENSSSCT00000005107.2	4,3,2	chr1:132819247-132825589|chr1:132830751-132849898
chr1	132828552	132830751	-	2	circRNA	ENSSSCT00000005107.2	3,2	chr1:132825754-132828552|chr1:132830751-132849898
chr1	132829558	132830751	-	1	circRNA	ENSSSCT00000005107.2	2	chr1:132828697-132829558|chr1:132830751-132849898
chr1	132905797	132909067	+	2	circRNA	ENSSSCT00000005108.2	2,3	chr1:132895566-132905797|chr1:132909067-132912342
chr1	132905797	132925720	+	10	circRNA	ENSSSCT00000005108.2	2,3,4,5,6,7,8,9,10,11	chr1:132895566-132905797|chr1:132925720-132932553
chr1	132908962	132918509	+	5	circRNA	ENSSSCT00000005108.2	3,4,5,6,7	chr1:132906553-132908962|chr1:132918509-132919343
chr1	132919343	132920994	+	2	circRNA	ENSSSCT00000005108.2	8,9	chr1:132918509-132919343|chr1:132920994-132923265
chr1	132962461	132967155	-	3	circRNA	ENSSSCT00000005109.2	8,7,6	chr1:132955912-132962461|chr1:132967155-132969135
chr1	132962461	132969266	-	4	circRNA	ENSSSCT00000005109.2	8,7,6,5	chr1:132955912-132962461|chr1:132969266-132973440
chr1	132962461	132974980	-	6	circRNA	ENSSSCT00000005109.2	8,7,6,5,4,3	chr1:132955912-132962461|chr1:132974980-132995833
chr1	132965229	132967155	-	2	circRNA	ENSSSCT00000005109.2	7,6	chr1:132962606-132965229|chr1:132967155-132969135
chr1	132965229	132974980	-	5	circRNA	ENSSSCT00000005109.2	7,6,5,4,3	chr1:132962606-132965229|chr1:132974980-132995833
chr1	132967047	132969266	-	2	circRNA	ENSSSCT00000005109.2	6,5	chr1:132965373-132967047|chr1:132969266-132973440
chr1	133480685	133512016	-	8	circRNA	ENSSSCT00000005116.2	9,8,7,6,5,4,3,2	chr1:133477117-133480685|chr1:133512016-133550203
chr1	133499718	133512016	-	3	circRNA	ENSSSCT00000005116.2	4,3,2	chr1:133487611-133499718|chr1:133512016-133550203
chr1	134284840	134300133	-	5	circRNA	ENSSSCT00000005118.2	19,18,17,16,15	chr1:134282410-134284840|chr1:134300133-134302981
chr1	134284840	134303284	-	6	circRNA	ENSSSCT00000005118.2	19,18,17,16,15,14	chr1:134282410-134284840|chr1:134303284-134307193
chr1	134286636	134303284	-	5	circRNA	ENSSSCT00000005118.2	18,17,16,15,14	chr1:134285031-134286636|chr1:134303284-134307193
chr1	134290614	134300133	-	3	circRNA	ENSSSCT00000005118.2	17,16,15	chr1:134287194-134290614|chr1:134300133-134302981
chr1	134313185	134331638	-	5	circRNA	ENSSSCT00000005118.2	9,8,7,6,5	chr1:134312596-134313185|chr1:134331638-134334827
chr1	134324226	134331638	-	3	circRNA	ENSSSCT00000005118.2	7,6,5	chr1:134320599-134324226|chr1:134331638-134334827
chr1	134518964	134526927	+	4	circRNA	ENSSSCT00000005120.2	4,5,6,7	chr1:134518186-134518964|chr1:134526927-134529358
chr1	134520213	134526927	+	3	circRNA	ENSSSCT00000005120.2	5,6,7	chr1:134519147-134520213|chr1:134526927-134529358
chr1	134555418	134556263	+	2	circRNA	ENSSSCT00000005120.2	18,19	chr1:134554714-134555418|chr1:134556263-134559129
chr1	134555418	134559204	+	3	circRNA	ENSSSCT00000005120.2	18,19,20	chr1:134554714-134555418|chr1:134559204-134560555
chr1	134599617	134607972	+	4	circRNA	ENSSSCT00000005121.2	1,2,3,4	None|chr1:134607972-134611509
chr1	134599617	134615687	+	8	circRNA	ENSSSCT00000005121.2	1,2,3,4,5,6,7,8	None|chr1:134615687-134617988
chr1	134599617	134618061	+	9	circRNA	ENSSSCT00000005121.2	1,2,3,4,5,6,7,8,9	None|chr1:134618061-134619207
chr1	134599617	134619308	+	10	circRNA	ENSSSCT00000005121.2	1,2,3,4,5,6,7,8,9,10	None|chr1:134619308-134628971
chr1	134599617	134629106	+	11	circRNA	ENSSSCT00000005121.2	1,2,3,4,5,6,7,8,9,10,11	None|chr1:134629106-134632354
chr1	134599617	134635761	+	14	circRNA	ENSSSCT00000005121.2	1,2,3,4,5,6,7,8,9,10,11,12,13,14	None|chr1:134635761-134636278
chr1	134599617	134636559	+	15	circRNA	ENSSSCT00000005121.2	1,2,3,4,5,6,7,8,9,10,11,12,13,14,15	None|chr1:134636559-134637845
chr1	134599617	134643130	+	20	circRNA	ENSSSCT00000005121.2	1,2,3,4,5,6,7,8,9,10,11,12,13,14,15,16,17,18,19,20	None|chr1:134643130-134651077
chr1	134599617	134657483	+	25	circRNA	ENSSSCT00000005121.2	1,2,3,4,5,6,7,8,9,10,11,12,13,14,15,16,17,18,19,20,21,22,23,24,25	None|chr1:134657483-134659824
chr1	134603848	134607972	+	3	circRNA	ENSSSCT00000005121.2	2,3,4	chr1:134599697-134603848|chr1:134607972-134611509
chr1	134607758	134615687	+	5	circRNA	ENSSSCT00000005121.2	4,5,6,7,8	chr1:134605430-134607758|chr1:134615687-134617988
chr1	134612797	134615687	+	3	circRNA	ENSSSCT00000005121.2	6,7,8	chr1:134611640-134612797|chr1:134615687-134617988
chr1	134612797	134618061	+	4	circRNA	ENSSSCT00000005121.2	6,7,8,9	chr1:134611640-134612797|chr1:134618061-134619207
chr1	134628971	134632408	+	2	circRNA	ENSSSCT00000005121.2	11,12	chr1:134619308-134628971|chr1:134632408-134635207
chr1	134628971	134643130	+	10	circRNA	ENSSSCT00000005121.2	11,12,13,14,15,16,17,18,19,20	chr1:134619308-134628971|chr1:134643130-134651077
chr1	134628971	134651252	+	11	circRNA	ENSSSCT00000005121.2	11,12,13,14,15,16,17,18,19,20,21	chr1:134619308-134628971|chr1:134651252-134653308
chr1	134628971	134653435	+	12	circRNA	ENSSSCT00000005121.2	11,12,13,14,15,16,17,18,19,20,21,22	chr1:134619308-134628971|chr1:134653435-134654491
chr1	134632354	134636559	+	4	circRNA	ENSSSCT00000005121.2	12,13,14,15	chr1:134629106-134632354|chr1:134636559-134637845
chr1	134632354	134651252	+	10	circRNA	ENSSSCT00000005121.2	12,13,14,15,16,17,18,19,20,21	chr1:134629106-134632354|chr1:134651252-134653308
chr1	134632354	134654676	+	12	circRNA	ENSSSCT00000005121.2	12,13,14,15,16,17,18,19,20,21,22,23	chr1:134629106-134632354|chr1:134654676-134655799
chr1	134632354	134657483	+	14	circRNA	ENSSSCT00000005121.2	12,13,14,15,16,17,18,19,20,21,22,23,24,25	chr1:134629106-134632354|chr1:134657483-134659824
chr1	134632354	134667697	+	16	circRNA	ENSSSCT00000005121.2	12,13,14,15,16,17,18,19,20,21,22,23,24,25,26,27	chr1:134629106-134632354|chr1:134667697-134670192
chr1	134632354	134679346	+	24	circRNA	ENSSSCT00000005121.2	12,13,14,15,16,17,18,19,20,21,22,23,24,25,26,27,28,29,30,31,32,33,34,35	chr1:134629106-134632354|chr1:134679346-134682627
chr1	134635207	134651252	+	9	circRNA	ENSSSCT00000005121.2	13,14,15,16,17,18,19,20,21	chr1:134632408-134635207|chr1:134651252-134653308
chr1	134640968	134657483	+	7	circRNA	ENSSSCT00000005121.2	19,20,21,22,23,24,25	chr1:134639540-134640968|chr1:134657483-134659824
chr1	134640968	134659892	+	8	circRNA	ENSSSCT00000005121.2	19,20,21,22,23,24,25,26	chr1:134639540-134640968|chr1:134659892-134667600
chr1	134640968	134670263	+	10	circRNA	ENSSSCT00000005121.2	19,20,21,22,23,24,25,26,27,28	chr1:134639540-134640968|chr1:134670263-134672384
chr1	134651077	134679346	+	15	circRNA	ENSSSCT00000005121.2	21,22,23,24,25,26,27,28,29,30,31,32,33,34,35	chr1:134643130-134651077|chr1:134679346-134682627
chr1	134653308	134654676	+	2	circRNA	ENSSSCT00000005121.2	22,23	chr1:134651252-134653308|chr1:134654676-134655799
chr1	134653308	134675125	+	9	circRNA	ENSSSCT00000005121.2	22,23,24,25,26,27,28,29,30	chr1:134651252-134653308|chr1:134675125-134677507
chr1	134655799	134659892	+	3	circRNA	ENSSSCT00000005121.2	24,25,26	chr1:134654676-134655799|chr1:134659892-134667600
chr1	134655799	134667697	+	4	circRNA	ENSSSCT00000005121.2	24,25,26,27	chr1:134654676-134655799|chr1:134667697-134670192
chr1	134655799	134679346	+	12	circRNA	ENSSSCT00000005121.2	24,25,26,27,28,29,30,31,32,33,34,35	chr1:134654676-134655799|chr1:134679346-134682627
chr1	134659824	134667697	+	2	circRNA	ENSSSCT00000005121.2	26,27	chr1:134657483-134659824|chr1:134667697-134670192
chr1	134659824	134670263	+	3	circRNA	ENSSSCT00000005121.2	26,27,28	chr1:134657483-134659824|chr1:134670263-134672384
chr1	134659824	134675125	+	5	circRNA	ENSSSCT00000005121.2	26,27,28,29,30	chr1:134657483-134659824|chr1:134675125-134677507
chr1	134670192	134682893	+	10	circRNA	ENSSSCT00000005121.2	28,29,30,31,32,33,34,35,36,37	chr1:134667697-134670192|chr1:134682893-134688186
chr1	134677507	134682893	+	7	circRNA	ENSSSCT00000005121.2	31,32,33,34,35,36,37	chr1:134675125-134677507|chr1:134682893-134688186
chr1	134678892	134682893	+	4	circRNA	ENSSSCT00000005121.2	34,35,36,37	chr1:134678775-134678892|chr1:134682893-134688186
chr1	134756873	134758013	-	2	circRNA	ENSSSCT00000005124.2	15,14	chr1:134755068-134756873|chr1:134758013-134760145
chr1	134770023	134774718	-	2	circRNA	ENSSSCT00000005124.2	11,10	chr1:134761059-134770023|chr1:134774718-134775183
chr1	134770023	134790152	-	8	circRNA	ENSSSCT00000005124.2	11,10,9,8,7,6,5,4	chr1:134761059-134770023|chr1:134790152-134796958
chr1	134774497	134774718	-	1	circRNA	ENSSSCT00000005124.2	10	chr1:134770608-134774497|chr1:134774718-134775183
chr1	134774497	134782945	-	4	circRNA	ENSSSCT00000005124.2	10,9,8,7	chr1:134770608-134774497|chr1:134782945-134785724
chr1	134774497	134790152	-	7	circRNA	ENSSSCT00000005124.2	10,9,8,7,6,5,4	chr1:134770608-134774497|chr1:134790152-134796958
chr1	134774497	134800523	-	9	circRNA	ENSSSCT00000005124.2	10,9,8,7,6,5,4,3,2	chr1:134770608-134774497|chr1:134800523-134815687
chr1	134775183	134782945	-	3	circRNA	ENSSSCT00000005124.2	9,8,7	chr1:134774718-134775183|chr1:134782945-134785724
chr1	134775183	134790152	-	6	circRNA	ENSSSCT00000005124.2	9,8,7,6,5,4	chr1:134774718-134775183|chr1:134790152-134796958
chr1	134778128	134790152	-	5	circRNA	ENSSSCT00000005124.2	8,7,6,5,4	chr1:134775328-134778128|chr1:134790152-134796958
chr1	134778128	134797103	-	6	circRNA	ENSSSCT00000005124.2	8,7,6,5,4,3	chr1:134775328-134778128|chr1:134797103-134800359
chr1	134778128	134800523	-	7	circRNA	ENSSSCT00000005124.2	8,7,6,5,4,3,2	chr1:134775328-134778128|chr1:134800523-134815687
chr1	134782800	134787969	-	3	circRNA	ENSSSCT00000005124.2	7,6,5	chr1:134778291-134782800|chr1:134787969-134790066
chr1	134782800	134790152	-	4	circRNA	ENSSSCT00000005124.2	7,6,5,4	chr1:134778291-134782800|chr1:134790152-134796958
chr1	134790066	134797103	-	2	circRNA	ENSSSCT00000005124.2	4,3	chr1:134787969-134790066|chr1:134797103-134800359
chr1	134790066	134800523	-	3	circRNA	ENSSSCT00000005124.2	4,3,2	chr1:134787969-134790066|chr1:134800523-134815687
chr1	135097122	135106264	+	5	circRNA	ENSSSCT00000005130.2	2,3,4,5,6	chr1:134987480-135097122|chr1:135106264-135120569
chr1	135104395	135106264	+	3	circRNA	ENSSSCT00000005130.2	4,5,6	chr1:135102069-135104395|chr1:135106264-135120569
chr1	135371125	135377427	+	3	circRNA	ENSSSCT00000005131.2	4,5,6	chr1:135333460-135371125|chr1:135377427-135414221
chr1	136203227	136221620	-	3	circRNA	ENSSSCT00000005136.2	8,7,6	chr1:136171889-136203227|chr1:136221620-136271278
chr1	136203227	136275220	-	5	circRNA	ENSSSCT00000005136.2	8,7,6,5,4	chr1:136171889-136203227|chr1:136275220-136281105
chr1	136203227	136291811	-	7	circRNA	ENSSSCT00000005136.2	8,7,6,5,4,3,2	chr1:136171889-136203227|chr1:136291811-136303687
chr1	136271278	136275220	-	2	circRNA	ENSSSCT00000005136.2	5,4	chr1:136221620-136271278|chr1:136275220-136281105
chr1	136271278	136291811	-	4	circRNA	ENSSSCT00000005136.2	5,4,3,2	chr1:136221620-136271278|chr1:136291811-136303687
chr1	136384654	136393043	+	7	circRNA	ENSSSCT00000005137.2	3,4,5,6,7,8,9	chr1:136383798-136384654|chr1:136393043-136396937
chr1	136391765	136393043	+	3	circRNA	ENSSSCT00000005137.2	7,8,9	chr1:136389272-136391765|chr1:136393043-136396937
chr1	136392703	136393043	+	2	circRNA	ENSSSCT00000005137.2	8,9	chr1:136391940-136392703|chr1:136393043-136396937
chr1	136466616	136476023	+	4	circRNA	ENSSSCT00000005138.2	2,3,4,5	chr1:136458564-136466616|chr1:136476023-136476310
chr1	136466616	136477100	+	6	circRNA	ENSSSCT00000005138.2	2,3,4,5,6,7	chr1:136458564-136466616|chr1:136477100-136481665
chr1	136475793	136477100	+	3	circRNA	ENSSSCT00000005138.2	5,6,7	chr1:136471851-136475793|chr1:136477100-136481665
chr1	136476984	136491204	+	8	circRNA	ENSSSCT00000005138.2	7,8,9,10,11,12,13,14	chr1:136476335-136476984|chr1:136491204-136492806
chr1	136476984	136493027	+	9	circRNA	ENSSSCT00000005138.2	7,8,9,10,11,12,13,14,15	chr1:136476335-136476984|chr1:136493027-136495009
chr1	136476984	136495164	+	10	circRNA	ENSSSCT00000005138.2	7,8,9,10,11,12,13,14,15,16	chr1:136476335-136476984|chr1:136495164-136501413
chr1	136476984	136501633	+	11	circRNA	ENSSSCT00000005138.2	7,8,9,10,11,12,13,14,15,16,17	chr1:136476335-136476984|chr1:136501633-136509093
chr1	136483457	136489068	+	5	circRNA	ENSSSCT00000005138.2	9,10,11,12,13	chr1:136481800-136483457|chr1:136489068-136491041
chr1	136483457	136501633	+	9	circRNA	ENSSSCT00000005138.2	9,10,11,12,13,14,15,16,17	chr1:136481800-136483457|chr1:136501633-136509093
chr1	136735115	136754848	+	4	circRNA	ENSSSCT00000005142.1	11,12,13,14	chr1:136729588-136735115|chr1:136754848-136759320
chr1	136759320	136797746	+	12	circRNA	ENSSSCT00000029380.1	15,16,17,18,19,20,21,22,23,24,25,26	chr1:136757901-136759320|chr1:136797746-136801121
chr1	137224753	137232765	+	4	circRNA	ENSSSCT00000005143.2	29,30,31,32	chr1:137221668-137224753|chr1:137232765-137235109
chr1	137259148	137259271	+	1	circRNA	ENSSSCT00000005143.2	47	chr1:137259011-137259148|chr1:137259271-137260703
chr1	137259148	137260829	+	2	circRNA	ENSSSCT00000005143.2	47,48	chr1:137259011-137259148|chr1:137260829-137262572
chr1	137277047	137284151	+	3	circRNA	ENSSSCT00000005143.2	57,58,59	chr1:137273178-137277047|chr1:137284151-137286349
chr1	137286466	137286506	+	1	ciRNA	ENSSSCT00000005143.2	60	chr1:137286466-137287274
chr1	138049529	138050771	-	4	circRNA	ENSSSCT00000005149.2	17,16,15,14	chr1:138048025-138049529|chr1:138050771-138051573
chr1	138056143	138056821	-	2	circRNA	ENSSSCT00000005149.2	3,2	chr1:138055594-138056143|chr1:138056821-138096077
chr1	140701946	140704608	+	3	circRNA	ENSSSCT00000005152.2	7,8,9	chr1:140697116-140701946|chr1:140704608-140706052
chr1	141161798	141164671	+	1	ciRNA	ENSSSCT00000005160.2	4	chr1:141161798-141164701
chr1	141274413	141278890	-	2	circRNA	ENSSSCT00000005166.2	5,4	chr1:141265133-141274413|chr1:141278890-141284039
chr1	141486241	141494309	+	4	circRNA	ENSSSCT00000005172.2	4,5,6,7	chr1:141480514-141486241|chr1:141494309-141497347
chr1	141486241	141501160	+	7	circRNA	ENSSSCT00000005172.2	4,5,6,7,8,9,10	chr1:141480514-141486241|chr1:141501160-141502323
chr1	141600566	141612336	-	6	circRNA	ENSSSCT00000028050.1	7,6,5,4,3,2	chr1:141598851-141600566|chr1:141612336-141616946
chr1	141604890	141612336	-	5	circRNA	ENSSSCT00000028050.1	6,5,4,3,2	chr1:141600732-141604890|chr1:141612336-141616946
chr1	141607416	141612336	-	4	circRNA	ENSSSCT00000028050.1	5,4,3,2	chr1:141604957-141607416|chr1:141612336-141616946
chr1	141727583	141730493	-	3	circRNA	ENSSSCT00000005181.2	5,4,3	chr1:141725021-141727583|chr1:141730493-141742431
chr1	141982454	141989824	+	3	circRNA	ENSSSCT00000005183.2	3,4,5	chr1:141952320-141982454|chr1:141989824-141993841
chr1	141982454	141994380	+	5	circRNA	ENSSSCT00000005183.2	3,4,5,6,7	chr1:141952320-141982454|chr1:141994380-141994453
chr1	141993841	141994380	+	2	circRNA	ENSSSCT00000005183.2	6,7	chr1:141989824-141993841|chr1:141994380-141994453
chr1	142496404	142523870	-	3	circRNA	ENSSSCT00000005185.2	10,9,8	chr1:142495568-142496404|chr1:142523870-142525117
chr1	142523716	142527425	-	4	circRNA	ENSSSCT00000005185.2	8,7,6,5	chr1:142500293-142523716|chr1:142527425-142553752
chr1	142525117	142527425	-	3	circRNA	ENSSSCT00000005185.2	7,6,5	chr1:142523870-142525117|chr1:142527425-142553752
chr1	142593619	142593713	+	1	ciRNA	ENSSSCT00000005188.2	10	chr1:142593619-142593757
chr1	142617448	142618213	-	2	circRNA	ENSSSCT00000005190.2	10,9	chr1:142616471-142617448|chr1:142618213-142620188
chr1	142617448	142635716	-	9	circRNA	ENSSSCT00000005190.2	10,9,8,7,6,5,4,3,2	chr1:142616471-142617448|chr1:142635716-142643577
chr1	142620188	142635716	-	7	circRNA	ENSSSCT00000005190.2	8,7,6,5,4,3,2	chr1:142618213-142620188|chr1:142635716-142643577
chr1	142633279	142635716	-	2	circRNA	ENSSSCT00000005190.2	3,2	chr1:142626377-142633279|chr1:142635716-142643577
chr1	142656544	142656765	+	1	circRNA	ENSSSCT00000005191.2	11	chr1:142652263-142656544|chr1:142656765-142657562
chr1	142723029	142729377	+	13	circRNA	ENSSSCT00000005195.2	9,10,11,12,13,14,15,16,17,18,19,20,21	chr1:142721364-142723029|chr1:142729377-142730107
chr1	142893339	142895620	-	4	circRNA	ENSSSCT00000005200.2	13,12,11,10	chr1:142890577-142893339|chr1:142895620-142920882
chr1	142920882	142926148	-	4	circRNA	ENSSSCT00000005200.2	9,8,7,6	chr1:142895620-142920882|chr1:142926148-142929350
chr1	142920882	142930389	-	7	circRNA	ENSSSCT00000005200.2	9,8,7,6,5,4,3	chr1:142895620-142920882|chr1:142930389-142934476
chr1	142926068	142930389	-	4	circRNA	ENSSSCT00000005200.2	6,5,4,3	chr1:142923955-142926068|chr1:142930389-142934476
chr1	142958353	142966444	-	3	circRNA	ENSSSCT00000005202.2	9,8,7	chr1:142956028-142958353|chr1:142966444-142969286
chr1	142958353	142977395	-	8	circRNA	ENSSSCT00000005202.2	9,8,7,6,5,4,3,2	chr1:142956028-142958353|chr1:142977395-142982392
chr1	142976242	142977395	-	3	circRNA	ENSSSCT00000005202.2	4,3,2	chr1:142971620-142976242|chr1:142977395-142982392
chr1	143214052	143218917	+	3	circRNA	ENSSSCT00000005209.2	2,3,4	chr1:143205374-143214052|chr1:143218917-143219138
chr1	143214052	143222705	+	9	circRNA	ENSSSCT00000005209.2	2,3,4,5,6,7,8,9,10	chr1:143205374-143214052|chr1:143222705-143231693
chr1	143219138	143262310	+	23	circRNA	ENSSSCT00000005209.2	5,6,7,8,9,10,11,12,13,14,15,16,17,18,19,20,21,22,23,24,25,26,27	chr1:143218917-143219138|chr1:143262310-143267764
chr1	143219837	143231793	+	6	circRNA	ENSSSCT00000005209.2	6,7,8,9,10,11	chr1:143219262-143219837|chr1:143231793-143232711
chr1	143219837	143232840	+	7	circRNA	ENSSSCT00000005209.2	6,7,8,9,10,11,12	chr1:143219262-143219837|chr1:143232840-143235961
chr1	143222547	143239435	+	8	circRNA	ENSSSCT00000005209.2	10,11,12,13,14,15,16,17	chr1:143222207-143222547|chr1:143239435-143242158
chr1	143231693	143249745	+	11	circRNA	ENSSSCT00000005209.2	11,12,13,14,15,16,17,18,19,20,21	chr1:143222705-143231693|chr1:143249745-143252510
chr1	143231693	143262310	+	17	circRNA	ENSSSCT00000005209.2	11,12,13,14,15,16,17,18,19,20,21,22,23,24,25,26,27	chr1:143222705-143231693|chr1:143262310-143267764
chr1	143232711	143238031	+	4	circRNA	ENSSSCT00000005209.2	12,13,14,15	chr1:143231793-143232711|chr1:143238031-143239018
chr1	143237580	143242222	+	5	circRNA	ENSSSCT00000005209.2	14,15,16,17,18	chr1:143236142-143237580|chr1:143242222-143245292
chr1	143239018	143242222	+	3	circRNA	ENSSSCT00000005209.2	16,17,18	chr1:143238031-143239018|chr1:143242222-143245292
chr1	143242158	143245417	+	2	circRNA	ENSSSCT00000005209.2	18,19	chr1:143239435-143242158|chr1:143245417-143248375
chr1	143245292	143252559	+	4	circRNA	ENSSSCT00000005209.2	19,20,21,22	chr1:143242222-143245292|chr1:143252559-143252924
chr1	143245292	143256012	+	7	circRNA	ENSSSCT00000005209.2	19,20,21,22,23,24,25	chr1:143242222-143245292|chr1:143256012-143260561
chr1	143245292	143262310	+	9	circRNA	ENSSSCT00000005209.2	19,20,21,22,23,24,25,26,27	chr1:143242222-143245292|chr1:143262310-143267764
chr1	143245292	143267970	+	10	circRNA	ENSSSCT00000005209.2	19,20,21,22,23,24,25,26,27,28	chr1:143242222-143245292|chr1:143267970-143271554
chr1	143245292	143272864	+	12	circRNA	ENSSSCT00000005209.2	19,20,21,22,23,24,25,26,27,28,29,30	chr1:143242222-143245292|chr1:143272864-143275688
chr1	143245292	143275786	+	13	circRNA	ENSSSCT00000005209.2	19,20,21,22,23,24,25,26,27,28,29,30,31	chr1:143242222-143245292|chr1:143275786-143279274
chr1	143245292	143280515	+	15	circRNA	ENSSSCT00000005209.2	19,20,21,22,23,24,25,26,27,28,29,30,31,32,33	chr1:143242222-143245292|chr1:143280515-143283363
chr1	143245292	143285303	+	17	circRNA	ENSSSCT00000005209.2	19,20,21,22,23,24,25,26,27,28,29,30,31,32,33,34,35	chr1:143242222-143245292|chr1:143285303-143290188
chr1	143245292	143291819	+	19	circRNA	ENSSSCT00000005209.2	19,20,21,22,23,24,25,26,27,28,29,30,31,32,33,34,35,36,37	chr1:143242222-143245292|chr1:143291819-143294797
chr1	143245292	143294885	+	20	circRNA	ENSSSCT00000005209.2	19,20,21,22,23,24,25,26,27,28,29,30,31,32,33,34,35,36,37,38	chr1:143242222-143245292|chr1:143294885-143296817
chr1	143248375	143256012	+	6	circRNA	ENSSSCT00000005209.2	20,21,22,23,24,25	chr1:143245417-143248375|chr1:143256012-143260561
chr1	143248375	143285303	+	16	circRNA	ENSSSCT00000005209.2	20,21,22,23,24,25,26,27,28,29,30,31,32,33,34,35	chr1:143245417-143248375|chr1:143285303-143290188
chr1	143249642	143253079	+	3	circRNA	ENSSSCT00000005209.2	21,22,23	chr1:143248428-143249642|chr1:143253079-143254878
chr1	143249642	143256012	+	5	circRNA	ENSSSCT00000005209.2	21,22,23,24,25	chr1:143248428-143249642|chr1:143256012-143260561
chr1	143249642	143291819	+	17	circRNA	ENSSSCT00000005209.2	21,22,23,24,25,26,27,28,29,30,31,32,33,34,35,36,37	chr1:143248428-143249642|chr1:143291819-143294797
chr1	143254878	143294885	+	15	circRNA	ENSSSCT00000005209.2	24,25,26,27,28,29,30,31,32,33,34,35,36,37,38	chr1:143253079-143254878|chr1:143294885-143296817
chr1	143267764	143285303	+	8	circRNA	ENSSSCT00000005209.2	28,29,30,31,32,33,34,35	chr1:143262310-143267764|chr1:143285303-143290188
chr1	143271554	143280515	+	5	circRNA	ENSSSCT00000005209.2	29,30,31,32,33	chr1:143267970-143271554|chr1:143280515-143283363
chr1	143271554	143283419	+	6	circRNA	ENSSSCT00000005209.2	29,30,31,32,33,34	chr1:143267970-143271554|chr1:143283419-143285206
chr1	143271554	143285303	+	7	circRNA	ENSSSCT00000005209.2	29,30,31,32,33,34,35	chr1:143267970-143271554|chr1:143285303-143290188
chr1	143279274	143285303	+	4	circRNA	ENSSSCT00000005209.2	32,33,34,35	chr1:143275786-143279274|chr1:143285303-143290188
chr1	143279274	143291819	+	6	circRNA	ENSSSCT00000005209.2	32,33,34,35,36,37	chr1:143275786-143279274|chr1:143291819-143294797
chr1	143285206	143291819	+	3	circRNA	ENSSSCT00000005209.2	35,36,37	chr1:143283419-143285206|chr1:143291819-143294797
chr1	143296817	143303263	+	4	circRNA	ENSSSCT00000005209.2	39,40,41,42	chr1:143294885-143296817|chr1:143303263-143313702
chr1	143361256	143365464	+	2	circRNA	ENSSSCT00000005210.2	2,3	chr1:143333934-143361256|chr1:143365464-143396358
chr1	143361256	143404035	+	4	circRNA	ENSSSCT00000005210.2	2,3,4,5	chr1:143333934-143361256|chr1:143404035-143405805
chr1	143361256	143405910	+	5	circRNA	ENSSSCT00000005210.2	2,3,4,5,6	chr1:143333934-143361256|chr1:143405910-143420872
chr1	143361256	143463105	+	12	circRNA	ENSSSCT00000005210.2	2,3,4,5,6,7,8,9,10,11,12,13	chr1:143333934-143361256|chr1:143463105-143473267
chr1	143396358	143405910	+	3	circRNA	ENSSSCT00000005210.2	4,5,6	chr1:143365464-143396358|chr1:143405910-143420872
chr1	143396358	143420938	+	4	circRNA	ENSSSCT00000005210.2	4,5,6,7	chr1:143365464-143396358|chr1:143420938-143425359
chr1	143396358	143426509	+	6	circRNA	ENSSSCT00000005210.2	4,5,6,7,8,9	chr1:143365464-143396358|chr1:143426509-143439948
chr1	143396358	143449923	+	8	circRNA	ENSSSCT00000005210.2	4,5,6,7,8,9,10,11	chr1:143365464-143396358|chr1:143449923-143460230
chr1	143403894	143405910	+	2	circRNA	ENSSSCT00000005210.2	5,6	chr1:143396432-143403894|chr1:143405910-143420872
chr1	143403894	143426509	+	5	circRNA	ENSSSCT00000005210.2	5,6,7,8,9	chr1:143396432-143403894|chr1:143426509-143439948
chr1	143403894	143463105	+	9	circRNA	ENSSSCT00000005210.2	5,6,7,8,9,10,11,12,13	chr1:143396432-143403894|chr1:143463105-143473267
chr1	143420872	143426509	+	3	circRNA	ENSSSCT00000005210.2	7,8,9	chr1:143405910-143420872|chr1:143426509-143439948
chr1	143460230	143463105	+	2	circRNA	ENSSSCT00000005210.2	12,13	chr1:143449923-143460230|chr1:143463105-143473267
chr1	143460230	143474541	+	3	circRNA	ENSSSCT00000005210.2	12,13,14	chr1:143449923-143460230|chr1:143474541-143477583
chr1	143462516	143463105	+	1	circRNA	ENSSSCT00000005210.2	13	chr1:143460442-143462516|chr1:143463105-143473267
chr1	143473267	143474541	+	1	circRNA	ENSSSCT00000005210.2	14	chr1:143463105-143473267|chr1:143474541-143477583
chr1	143536374	143536576	+	1	ciRNA	ENSSSCT00000005211.2	2	chr1:143536374-143536607
chr1	143540438	143541887	+	4	circRNA	ENSSSCT00000005211.2	11,12,13,14	chr1:143539706-143540438|chr1:143541887-143543545
chr1	143716907	143722519	-	4	circRNA	ENSSSCT00000005217.2	5,4,3,2	chr1:143713626-143716907|chr1:143722519-143731645
chr1	143756830	143759164	-	4	circRNA	ENSSSCT00000005220.2	5,4,3,2	chr1:143747176-143756830|chr1:143759164-143781594
chr1	143819042	143828012	+	4	circRNA	ENSSSCT00000005218.2	4,5,6,7	chr1:143813024-143819042|chr1:143828012-143830110
chr1	143819042	143830265	+	5	circRNA	ENSSSCT00000005218.2	4,5,6,7,8	chr1:143813024-143819042|chr1:143830265-143830349
chr1	143819042	143831209	+	7	circRNA	ENSSSCT00000005218.2	4,5,6,7,8,9,10	chr1:143813024-143819042|chr1:143831209-143833231
chr1	143830110	143837586	+	7	circRNA	ENSSSCT00000005218.2	8,9,10,11,12,13,14	chr1:143828012-143830110|chr1:143837586-143839205
chr1	143830870	143844559	+	10	circRNA	ENSSSCT00000005218.2	10,11,12,13,14,15,16,17,18,19	chr1:143830410-143830870|chr1:143844559-143845574
chr1	143833231	143834412	+	2	circRNA	ENSSSCT00000005218.2	11,12	chr1:143831209-143833231|chr1:143834412-143836280
chr1	143833231	143837586	+	4	circRNA	ENSSSCT00000005218.2	11,12,13,14	chr1:143831209-143833231|chr1:143837586-143839205
chr1	143833231	143839322	+	5	circRNA	ENSSSCT00000005218.2	11,12,13,14,15	chr1:143831209-143833231|chr1:143839322-143842164
chr1	143833231	143843694	+	8	circRNA	ENSSSCT00000005218.2	11,12,13,14,15,16,17,18	chr1:143831209-143833231|chr1:143843694-143844487
chr1	143833231	143845646	+	10	circRNA	ENSSSCT00000005218.2	11,12,13,14,15,16,17,18,19,20	chr1:143831209-143833231|chr1:143845646-143847104
chr1	143836280	143837586	+	2	circRNA	ENSSSCT00000005218.2	13,14	chr1:143834412-143836280|chr1:143837586-143839205
chr1	143836280	143839322	+	3	circRNA	ENSSSCT00000005218.2	13,14,15	chr1:143834412-143836280|chr1:143839322-143842164
chr1	143836280	143843694	+	6	circRNA	ENSSSCT00000005218.2	13,14,15,16,17,18	chr1:143834412-143836280|chr1:143843694-143844487
chr1	143853371	143861486	-	9	circRNA	ENSSSCT00000005224.2	20,19,18,17,16,15,14,13,12	chr1:143852975-143853371|chr1:143861486-143862122
chr1	143860562	143861486	-	2	circRNA	ENSSSCT00000005224.2	13,12	chr1:143855368-143860562|chr1:143861486-143862122
chr1	143860562	143862926	-	4	circRNA	ENSSSCT00000005224.2	13,12,11,10	chr1:143855368-143860562|chr1:143862926-143864067
chr1	143861277	143861486	-	1	circRNA	ENSSSCT00000005224.2	12	chr1:143860599-143861277|chr1:143861486-143862122
chr1	143862756	143868041	-	5	circRNA	ENSSSCT00000005224.2	10,9,8,7,6	chr1:143862134-143862756|chr1:143868041-143870964
chr1	143866994	143868041	-	2	circRNA	ENSSSCT00000005224.2	7,6	chr1:143865061-143866994|chr1:143868041-143870964
chr1	143927837	143978082	-	16	circRNA	ENSSSCT00000005225.2	19,18,17,16,15,14,13,12,11,10,9,8,7,6,5,4	chr1:143925880-143927837|chr1:143978082-143986341
chr1	143930282	143939373	-	5	circRNA	ENSSSCT00000005225.2	18,17,16,15,14	chr1:143927902-143930282|chr1:143939373-143941216
chr1	143930282	143956984	-	11	circRNA	ENSSSCT00000005225.2	18,17,16,15,14,13,12,11,10,9,8	chr1:143927902-143930282|chr1:143956984-143958995
chr1	143930282	143978082	-	15	circRNA	ENSSSCT00000005225.2	18,17,16,15,14,13,12,11,10,9,8,7,6,5,4	chr1:143927902-143930282|chr1:143978082-143986341
chr1	143932186	143978082	-	14	circRNA	ENSSSCT00000005225.2	17,16,15,14,13,12,11,10,9,8,7,6,5,4	chr1:143930535-143932186|chr1:143978082-143986341
chr1	143939293	143956984	-	7	circRNA	ENSSSCT00000005225.2	14,13,12,11,10,9,8	chr1:143936683-143939293|chr1:143956984-143958995
chr1	143939293	143978082	-	11	circRNA	ENSSSCT00000005225.2	14,13,12,11,10,9,8,7,6,5,4	chr1:143936683-143939293|chr1:143978082-143986341
chr1	143941216	143956984	-	6	circRNA	ENSSSCT00000005225.2	13,12,11,10,9,8	chr1:143939373-143941216|chr1:143956984-143958995
chr1	143941216	143959062	-	7	circRNA	ENSSSCT00000005225.2	13,12,11,10,9,8,7	chr1:143939373-143941216|chr1:143959062-143961915
chr1	143941216	143978082	-	10	circRNA	ENSSSCT00000005225.2	13,12,11,10,9,8,7,6,5,4	chr1:143939373-143941216|chr1:143978082-143986341
chr1	143955136	143956984	-	3	circRNA	ENSSSCT00000005225.2	10,9,8	chr1:143945942-143955136|chr1:143956984-143958995
chr1	143955136	143971028	-	6	circRNA	ENSSSCT00000005225.2	10,9,8,7,6,5	chr1:143945942-143955136|chr1:143971028-143977954
chr1	143955136	143978082	-	7	circRNA	ENSSSCT00000005225.2	10,9,8,7,6,5,4	chr1:143945942-143955136|chr1:143978082-143986341
chr1	143955136	143988318	-	9	circRNA	ENSSSCT00000005225.2	10,9,8,7,6,5,4,3,2	chr1:143945942-143955136|chr1:143988318-143989796
chr1	143955519	143956984	-	2	circRNA	ENSSSCT00000005225.2	9,8	chr1:143955290-143955519|chr1:143956984-143958995
chr1	143956887	143971028	-	4	circRNA	ENSSSCT00000005225.2	8,7,6,5	chr1:143955700-143956887|chr1:143971028-143977954
chr1	143956887	143978082	-	5	circRNA	ENSSSCT00000005225.2	8,7,6,5,4	chr1:143955700-143956887|chr1:143978082-143986341
chr1	143958995	143978082	-	4	circRNA	ENSSSCT00000005225.2	7,6,5,4	chr1:143956984-143958995|chr1:143978082-143986341
chr1	143961915	143978082	-	3	circRNA	ENSSSCT00000005225.2	6,5,4	chr1:143959062-143961915|chr1:143978082-143986341
chr1	143970845	143971028	-	1	circRNA	ENSSSCT00000005225.2	5	chr1:143961970-143970845|chr1:143971028-143977954
chr1	143970845	143978082	-	2	circRNA	ENSSSCT00000005225.2	5,4	chr1:143961970-143970845|chr1:143978082-143986341
chr1	143986341	143988318	-	2	circRNA	ENSSSCT00000005225.2	3,2	chr1:143978082-143986341|chr1:143988318-143989796
chr1	143995378	144007016	+	5	circRNA	ENSSSCT00000005226.2	3,4,5,6,7	chr1:143992359-143995378|chr1:144007016-144011614
chr1	144001830	144020737	+	9	circRNA	ENSSSCT00000005226.2	5,6,7,8,9,10,11,12,13	chr1:143999053-144001830|chr1:144020737-144021880
chr1	144006898	144030576	+	10	circRNA	ENSSSCT00000005226.2	7,8,9,10,11,12,13,14,15,16	chr1:144002027-144006898|chr1:144030576-144031455
chr1	144011614	144013993	+	3	circRNA	ENSSSCT00000005226.2	8,9,10	chr1:144007016-144011614|chr1:144013993-144016918
chr1	144011614	144032230	+	11	circRNA	ENSSSCT00000005226.2	8,9,10,11,12,13,14,15,16,17,18	chr1:144007016-144011614|chr1:144032230-144033016
chr1	144095303	144104434	+	4	circRNA	ENSSSCT00000005227.2	2,3,4,5	chr1:144089002-144095303|chr1:144104434-144105944
chr1	144095303	144117578	+	10	circRNA	ENSSSCT00000005227.2	2,3,4,5,6,7,8,9,10,11	chr1:144089002-144095303|chr1:144117578-144126367
chr1	144113380	144117578	+	3	circRNA	ENSSSCT00000005227.2	9,10,11	chr1:144109032-144113380|chr1:144117578-144126367
chr1	144113380	144126510	+	4	circRNA	ENSSSCT00000005227.2	9,10,11,12	chr1:144109032-144113380|chr1:144126510-144130437
chr1	144466516	144470691	+	8	circRNA	ENSSSCT00000005235.2	4,5,6,7,8,9,10,11	chr1:144463330-144466516|chr1:144470691-144474044
chr1	144474044	144480057	+	2	circRNA	ENSSSCT00000005235.2	12,13	chr1:144470691-144474044|chr1:144480057-144482193
chr1	144474044	144484131	+	5	circRNA	ENSSSCT00000005235.2	12,13,14,15,16	chr1:144470691-144474044|chr1:144484131-144485745
chr1	144479850	144480057	+	1	circRNA	ENSSSCT00000005235.2	13	chr1:144474096-144479850|chr1:144480057-144482193
chr1	144479850	144484131	+	4	circRNA	ENSSSCT00000005235.2	13,14,15,16	chr1:144474096-144479850|chr1:144484131-144485745
chr1	144535598	144537287	+	3	circRNA	ENSSSCT00000005234.2	10,11,12	chr1:144535055-144535598|chr1:144537287-144537544
chr1	144705006	144706137	+	1	circRNA	ENSSSCT00000005236.2	2	chr1:144695924-144705006|chr1:144706137-144729932
chr1	144705006	144732163	+	4	circRNA	ENSSSCT00000005236.2	2,3,4,5	chr1:144695924-144705006|chr1:144732163-144735805
chr1	144729932	144732163	+	3	circRNA	ENSSSCT00000005236.2	3,4,5	chr1:144706137-144729932|chr1:144732163-144735805
chr1	144729932	144736250	+	5	circRNA	ENSSSCT00000005236.2	3,4,5,6,7	chr1:144706137-144729932|chr1:144736250-144737981
chr1	144731865	144732163	+	2	circRNA	ENSSSCT00000005236.2	4,5	chr1:144730875-144731865|chr1:144732163-144735805
chr1	144737981	144738643	+	1	circRNA	ENSSSCT00000005236.2	8	chr1:144736250-144737981|chr1:144738643-144740601
chr1	144912205	144913759	+	2	circRNA	ENSSSCT00000005244.2	3,4	chr1:144911929-144912205|chr1:144913759-144914640
chr1	144913638	144914862	+	2	circRNA	ENSSSCT00000005244.2	4,5	chr1:144912295-144913638|chr1:144914862-144916246
chr1	144927615	144927993	+	2	circRNA	ENSSSCT00000005244.2	22,23	chr1:144925428-144927615|chr1:144927993-144928327
chr1	144961073	144962691	-	3	circRNA	ENSSSCT00000005246.2	21,20,19	chr1:144960856-144961073|chr1:144962691-144963273
chr1	144962049	144962691	-	2	circRNA	ENSSSCT00000005246.2	20,19	chr1:144961185-144962049|chr1:144962691-144963273
chr1	144963273	144964336	-	3	circRNA	ENSSSCT00000005246.2	18,17,16	chr1:144962691-144963273|chr1:144964336-144965370
chr1	145004013	145007808	-	2	circRNA	ENSSSCT00000005246.2	5,4	chr1:144995951-145004013|chr1:145007808-145009090
chr1	145237108	145250816	-	3	circRNA	ENSSSCT00000005250.2	4,3,2	chr1:145227864-145237108|chr1:145250816-145259369
chr1	145304934	145307889	+	4	circRNA	ENSSSCT00000005251.2	7,8,9,10	chr1:145296589-145304934|chr1:145307889-145312912
chr1	145401677	145403239	+	2	circRNA	ENSSSCT00000005252.2	5,6	chr1:145397708-145401677|chr1:145403239-145408742
chr1	145401677	145413053	+	5	circRNA	ENSSSCT00000005252.2	5,6,7,8,9	chr1:145397708-145401677|chr1:145413053-145414293
chr1	145408742	145414361	+	4	circRNA	ENSSSCT00000005252.2	7,8,9,10	chr1:145403239-145408742|chr1:145414361-145416171
chr1	145408742	145417869	+	7	circRNA	ENSSSCT00000005252.2	7,8,9,10,11,12,13	chr1:145403239-145408742|chr1:145417869-145425642
chr1	145408742	145430902	+	12	circRNA	ENSSSCT00000005252.2	7,8,9,10,11,12,13,14,15,16,17,18	chr1:145403239-145408742|chr1:145430902-145435887
chr1	145408742	145439488	+	17	circRNA	ENSSSCT00000005252.2	7,8,9,10,11,12,13,14,15,16,17,18,19,20,21,22,23	chr1:145403239-145408742|chr1:145439488-145455670
chr1	145408742	145455811	+	18	circRNA	ENSSSCT00000005252.2	7,8,9,10,11,12,13,14,15,16,17,18,19,20,21,22,23,24	chr1:145403239-145408742|chr1:145455811-145462506
chr1	145412857	145417869	+	5	circRNA	ENSSSCT00000005252.2	9,10,11,12,13	chr1:145409818-145412857|chr1:145417869-145425642
chr1	145412857	145436055	+	11	circRNA	ENSSSCT00000005252.2	9,10,11,12,13,14,15,16,17,18,19	chr1:145409818-145412857|chr1:145436055-145436545
chr1	145412857	145438147	+	14	circRNA	ENSSSCT00000005252.2	9,10,11,12,13,14,15,16,17,18,19,20,21,22	chr1:145409818-145412857|chr1:145438147-145439316
chr1	145412857	145439488	+	15	circRNA	ENSSSCT00000005252.2	9,10,11,12,13,14,15,16,17,18,19,20,21,22,23	chr1:145409818-145412857|chr1:145439488-145455670
chr1	145412857	145455811	+	16	circRNA	ENSSSCT00000005252.2	9,10,11,12,13,14,15,16,17,18,19,20,21,22,23,24	chr1:145409818-145412857|chr1:145455811-145462506
chr1	145412857	145486713	+	20	circRNA	ENSSSCT00000005252.2	9,10,11,12,13,14,15,16,17,18,19,20,21,22,23,24,25,26,27,28	chr1:145409818-145412857|chr1:145486713-145495497
chr1	145414293	145417869	+	4	circRNA	ENSSSCT00000005252.2	10,11,12,13	chr1:145413053-145414293|chr1:145417869-145425642
chr1	145414293	145427730	+	7	circRNA	ENSSSCT00000005252.2	10,11,12,13,14,15,16	chr1:145413053-145414293|chr1:145427730-145429098
chr1	145414293	145436055	+	10	circRNA	ENSSSCT00000005252.2	10,11,12,13,14,15,16,17,18,19	chr1:145413053-145414293|chr1:145436055-145436545
chr1	145416171	145417869	+	3	circRNA	ENSSSCT00000005252.2	11,12,13	chr1:145414361-145416171|chr1:145417869-145425642
chr1	145416171	145436055	+	9	circRNA	ENSSSCT00000005252.2	11,12,13,14,15,16,17,18,19	chr1:145414361-145416171|chr1:145436055-145436545
chr1	145416171	145438147	+	12	circRNA	ENSSSCT00000005252.2	11,12,13,14,15,16,17,18,19,20,21,22	chr1:145414361-145416171|chr1:145438147-145439316
chr1	145416171	145439488	+	13	circRNA	ENSSSCT00000005252.2	11,12,13,14,15,16,17,18,19,20,21,22,23	chr1:145414361-145416171|chr1:145439488-145455670
chr1	145416857	145427730	+	5	circRNA	ENSSSCT00000005252.2	12,13,14,15,16	chr1:145416381-145416857|chr1:145427730-145429098
chr1	145416857	145429216	+	6	circRNA	ENSSSCT00000005252.2	12,13,14,15,16,17	chr1:145416381-145416857|chr1:145429216-145430816
chr1	145416857	145436055	+	8	circRNA	ENSSSCT00000005252.2	12,13,14,15,16,17,18,19	chr1:145416381-145416857|chr1:145436055-145436545
chr1	145416857	145439488	+	12	circRNA	ENSSSCT00000005252.2	12,13,14,15,16,17,18,19,20,21,22,23	chr1:145416381-145416857|chr1:145439488-145455670
chr1	145416857	145479618	+	16	circRNA	ENSSSCT00000005252.2	12,13,14,15,16,17,18,19,20,21,22,23,24,25,26,27	chr1:145416381-145416857|chr1:145479618-145486640
chr1	145416857	145486713	+	17	circRNA	ENSSSCT00000005252.2	12,13,14,15,16,17,18,19,20,21,22,23,24,25,26,27,28	chr1:145416381-145416857|chr1:145486713-145495497
chr1	145425642	145439488	+	10	circRNA	ENSSSCT00000005252.2	14,15,16,17,18,19,20,21,22,23	chr1:145417869-145425642|chr1:145439488-145455670
chr1	145429098	145436055	+	3	circRNA	ENSSSCT00000005252.2	17,18,19	chr1:145427730-145429098|chr1:145436055-145436545
chr1	145429098	145438147	+	6	circRNA	ENSSSCT00000005252.2	17,18,19,20,21,22	chr1:145427730-145429098|chr1:145438147-145439316
chr1	145429098	145467243	+	10	circRNA	ENSSSCT00000005252.2	17,18,19,20,21,22,23,24,25,26	chr1:145427730-145429098|chr1:145467243-145479523
chr1	145429098	145486713	+	12	circRNA	ENSSSCT00000005252.2	17,18,19,20,21,22,23,24,25,26,27,28	chr1:145427730-145429098|chr1:145486713-145495497
chr1	145435887	145438147	+	4	circRNA	ENSSSCT00000005252.2	19,20,21,22	chr1:145430902-145435887|chr1:145438147-145439316
chr1	145435887	145467243	+	8	circRNA	ENSSSCT00000005252.2	19,20,21,22,23,24,25,26	chr1:145430902-145435887|chr1:145467243-145479523
chr1	145435887	145486713	+	10	circRNA	ENSSSCT00000005252.2	19,20,21,22,23,24,25,26,27,28	chr1:145430902-145435887|chr1:145486713-145495497
chr1	145436545	145438147	+	3	circRNA	ENSSSCT00000005252.2	20,21,22	chr1:145436055-145436545|chr1:145438147-145439316
chr1	145455670	145486713	+	5	circRNA	ENSSSCT00000005252.2	24,25,26,27,28	chr1:145439488-145455670|chr1:145486713-145495497
chr1	145462506	145486713	+	4	circRNA	ENSSSCT00000005252.2	25,26,27,28	chr1:145455811-145462506|chr1:145486713-145495497
chr1	145495497	145501459	+	6	circRNA	ENSSSCT00000005252.2	29,30,31,32,33,34	chr1:145486713-145495497|chr1:145501459-145503380
chr1	145707192	145707915	+	3	circRNA	ENSSSCT00000005261.2	2,3,4	chr1:145675117-145707192|chr1:145707915-145709588
chr1	145783802	145786629	-	2	circRNA	ENSSSCT00000005265.1	3,2	chr1:145764728-145783802|chr1:145786629-145798270
chr1	146007236	146009321	-	3	circRNA	ENSSSCT00000005274.2	6,5,4	chr1:146005441-146007236|chr1:146009321-146010126
chr1	146061299	146061850	+	1	ciRNA	ENSSSCT00000005276.1	4	chr1:146061299-146061884
chr1	146911185	146915951	-	7	circRNA	ENSSSCT00000005288.3	17,16,15,14,13,12,11	chr1:146910998-146911185|chr1:146915951-146916185
chr1	146912897	146916846	-	8	circRNA	ENSSSCT00000005288.3	16,15,14,13,12,11,10,9	chr1:146911420-146912897|chr1:146916846-146917148
chr1	146913163	146916359	-	6	circRNA	ENSSSCT00000005288.3	15,14,13,12,11,10	chr1:146913016-146913163|chr1:146916359-146916669
chr1	146914061	146914847	-	2	circRNA	ENSSSCT00000005288.3	14,13	chr1:146913323-146914061|chr1:146914847-146915561
chr1	146921992	146922481	-	1	ciRNA	ENSSSCT00000034520.1	2	chr1:146921967-146922481
chr1	148254442	148256175	+	3	circRNA	ENSSSCT00000005290.2	13,14,15	chr1:148253473-148254442|chr1:148256175-148258629
chr1	148258629	148259015	+	1	circRNA	ENSSSCT00000005290.2	16	chr1:148256175-148258629|chr1:148259015-148268892
chr1	148277880	148292614	-	5	circRNA	ENSSSCT00000005291.2	7,6,5,4,3	chr1:148275309-148277880|chr1:148292614-148294031
chr1	148284300	148292614	-	4	circRNA	ENSSSCT00000005291.2	6,5,4,3	chr1:148278048-148284300|chr1:148292614-148294031
chr1	148284300	148294177	-	5	circRNA	ENSSSCT00000005291.2	6,5,4,3,2	chr1:148278048-148284300|chr1:148294177-148303626
chr1	148459941	148497434	-	4	circRNA	ENSSSCT00000005292.1	5,4,3,2	chr1:148445586-148459941|chr1:148497434-148497672
chr1	148474710	148497434	-	3	circRNA	ENSSSCT00000005292.1	4,3,2	chr1:148460094-148474710|chr1:148497434-148497672
chr1	150198977	150210530	-	4	circRNA	ENSSSCT00000028778.1	5,4,3,2	chr1:150165475-150198977|chr1:150210530-150210964
chr1	152305079	152326850	-	9	circRNA	ENSSSCT00000005301.2	28,27,26,25,24,23,22,21,20	chr1:152304162-152305079|chr1:152326850-152329158
chr1	152311285	152326850	-	7	circRNA	ENSSSCT00000005301.2	26,25,24,23,22,21,20	chr1:152306756-152311285|chr1:152326850-152329158
chr1	152319828	152326850	-	4	circRNA	ENSSSCT00000005301.2	23,22,21,20	chr1:152315343-152319828|chr1:152326850-152329158
chr1	152333785	152340314	-	9	circRNA	ENSSSCT00000005301.2	17,16,15,14,13,12,11,10,9	chr1:152332431-152333785|chr1:152340314-152342914
chr1	152340210	152347427	-	5	circRNA	ENSSSCT00000005301.2	9,8,7,6,5	chr1:152334981-152340210|chr1:152347427-152348802
chr1	152342914	152345691	-	3	circRNA	ENSSSCT00000005301.2	8,7,6	chr1:152340314-152342914|chr1:152345691-152347350
chr1	152415398	152415581	+	1	ciRNA	ENSSSCT00000005302.3	4	chr1:152415398-152415582
chr1	152633398	152641110	+	9	circRNA	ENSSSCT00000005305.2	4,5,6,7,8,9,10,11,12	chr1:152632672-152633398|chr1:152641110-152641728
chr1	153313645	153317052	-	2	circRNA	ENSSSCT00000030424.1	4,3	chr1:153307607-153313645|chr1:153317052-153375247
chr1	153531657	153557035	-	10	circRNA	ENSSSCT00000005311.3	20,19,18,17,16,15,14,13,12,11	chr1:153524426-153531657|chr1:153557035-153562295
chr1	153548007	153565321	-	8	circRNA	ENSSSCT00000005311.3	15,14,13,12,11,10,9,8	chr1:153543690-153548007|chr1:153565321-153566883
chr1	153562295	153565321	-	3	circRNA	ENSSSCT00000005311.3	10,9,8	chr1:153557035-153562295|chr1:153565321-153566883
chr1	153772466	153773012	-	1	circRNA	ENSSSCT00000005311.3	2	chr1:153586599-153772466|chr1:153773012-153853654
chr1	154082448	154098927	-	3	circRNA	ENSSSCT00000005313.2	9,8,7	chr1:154058400-154082448|chr1:154098927-154123429
chr1	154082448	154123607	-	4	circRNA	ENSSSCT00000005313.2	9,8,7,6	chr1:154058400-154082448|chr1:154123607-154139504
chr1	154082448	154150097	-	8	circRNA	ENSSSCT00000005313.2	9,8,7,6,5,4,3,2	chr1:154058400-154082448|chr1:154150097-154169445
chr1	154123429	154150097	-	5	circRNA	ENSSSCT00000005313.2	6,5,4,3,2	chr1:154098927-154123429|chr1:154150097-154169445
chr1	154142805	154150097	-	2	circRNA	ENSSSCT00000005313.2	3,2	chr1:154139936-154142805|chr1:154150097-154169445
chr1	154299283	154314006	+	2	circRNA	ENSSSCT00000005314.2	2,3	chr1:154223816-154299283|chr1:154314006-154336618
chr1	154299283	154336794	+	3	circRNA	ENSSSCT00000005314.2	2,3,4	chr1:154223816-154299283|chr1:154336794-154339158
chr1	154299283	154339318	+	4	circRNA	ENSSSCT00000005314.2	2,3,4,5	chr1:154223816-154299283|chr1:154339318-154362173
chr1	154313903	154336794	+	2	circRNA	ENSSSCT00000005314.2	3,4	chr1:154299490-154313903|chr1:154336794-154339158
chr1	154336618	154339318	+	2	circRNA	ENSSSCT00000005314.2	4,5	chr1:154314006-154336618|chr1:154339318-154362173
chr1	154649288	154653274	+	3	circRNA	ENSSSCT00000023102.1	2,3,4	chr1:154648104-154649288|chr1:154653274-154667077
chr1	154649288	154667163	+	4	circRNA	ENSSSCT00000023102.1	2,3,4,5	chr1:154648104-154649288|chr1:154667163-154678837
chr1	154649485	154653274	+	3	circRNA	ENSSSCT00000028081.1	2,3,4	chr1:154648104-154649485|chr1:154653274-154666975
chr1	154649485	154667163	+	4	circRNA	ENSSSCT00000028081.1	2,3,4,5	chr1:154648104-154649485|chr1:154667163-154678837
chr1	154649485	154682921	+	6	circRNA	ENSSSCT00000028081.1	2,3,4,5,6,7	chr1:154648104-154649485|chr1:154682921-154686470
chr1	154651993	154653274	+	2	circRNA	ENSSSCT00000023102.1	3,4	chr1:154649420-154651993|chr1:154653274-154667077
chr1	155800961	155803095	+	3	circRNA	ENSSSCT00000005325.2	5,6,7	chr1:155779292-155800961|chr1:155803095-155804205
chr1	155800961	155807569	+	6	circRNA	ENSSSCT00000005325.2	5,6,7,8,9,10	chr1:155779292-155800961|chr1:155807569-155814245
chr1	155827294	155828841	+	2	circRNA	ENSSSCT00000005325.2	20,21	chr1:155824673-155827294|chr1:155828841-155831207
chr1	155828701	155828841	+	1	circRNA	ENSSSCT00000005325.2	21	chr1:155827458-155828701|chr1:155828841-155831207
chr1	156020860	156021356	-	2	circRNA	ENSSSCT00000005327.2	5,4	chr1:155962991-156020860|chr1:156021356-156033498
chr1	157477686	157486077	+	5	circRNA	ENSSSCT00000005332.2	2,3,4,5,6	chr1:157470996-157477686|chr1:157486077-157488078
chr1	157500054	157507946	+	3	circRNA	ENSSSCT00000005332.2	12,13,14	chr1:157497492-157500054|chr1:157507946-157512254
chr1	157816757	157823318	+	3	circRNA	ENSSSCT00000005334.2	2,3,4	chr1:157784050-157816757|chr1:157823318-157849876
chr1	157816757	157857097	+	5	circRNA	ENSSSCT00000005334.2	2,3,4,5,6	chr1:157784050-157816757|chr1:157857097-157867646
chr1	157816757	157871438	+	8	circRNA	ENSSSCT00000005334.2	2,3,4,5,6,7,8,9	chr1:157784050-157816757|chr1:157871438-157872665
chr1	157816757	157879888	+	11	circRNA	ENSSSCT00000005334.2	2,3,4,5,6,7,8,9,10,11,12	chr1:157784050-157816757|chr1:157879888-157880870
chr1	157819967	157823318	+	2	circRNA	ENSSSCT00000005334.2	3,4	chr1:157816821-157819967|chr1:157823318-157849876
chr1	157819967	157857097	+	4	circRNA	ENSSSCT00000005334.2	3,4,5,6	chr1:157816821-157819967|chr1:157857097-157867646
chr1	157849876	157857097	+	2	circRNA	ENSSSCT00000005334.2	5,6	chr1:157823318-157849876|chr1:157857097-157867646
chr1	157849876	157867791	+	3	circRNA	ENSSSCT00000005334.2	5,6,7	chr1:157823318-157849876|chr1:157867791-157870455
chr1	157849876	157872989	+	7	circRNA	ENSSSCT00000005334.2	5,6,7,8,9,10,11	chr1:157823318-157849876|chr1:157872989-157879744
chr1	157849876	157879888	+	8	circRNA	ENSSSCT00000005334.2	5,6,7,8,9,10,11,12	chr1:157823318-157849876|chr1:157879888-157880870
chr1	157855850	157879888	+	7	circRNA	ENSSSCT00000005334.2	6,7,8,9,10,11,12	chr1:157850181-157855850|chr1:157879888-157880870
chr1	157867646	157871438	+	3	circRNA	ENSSSCT00000005334.2	7,8,9	chr1:157857097-157867646|chr1:157871438-157872665
chr1	159826498	159836323	+	4	circRNA	ENSSSCT00000005346.2	3,4,5,6	chr1:159813934-159826498|chr1:159836323-159842601
chr1	159829162	159842770	+	4	circRNA	ENSSSCT00000005346.2	4,5,6,7	chr1:159826635-159829162|chr1:159842770-159844112
chr1	159829162	159848110	+	8	circRNA	ENSSSCT00000005346.2	4,5,6,7,8,9,10,11	chr1:159826635-159829162|chr1:159848110-159849287
chr1	159876745	159881378	-	5	circRNA	ENSSSCT00000005347.2	13,12,11,10,9	chr1:159865390-159876745|chr1:159881378-159884071
chr1	159880606	159905970	-	9	circRNA	ENSSSCT00000005347.2	10,9,8,7,6,5,4,3,2	chr1:159878247-159880606|chr1:159905970-159906702
chr1	159885150	159887139	-	2	circRNA	ENSSSCT00000005347.2	7,6	chr1:159884191-159885150|chr1:159887139-159894749
chr1	159887007	159894983	-	2	circRNA	ENSSSCT00000005347.2	6,5	chr1:159885259-159887007|chr1:159894983-159899220
chr1	159887007	159901920	-	4	circRNA	ENSSSCT00000005347.2	6,5,4,3	chr1:159885259-159887007|chr1:159901920-159904575
chr1	159894749	159905970	-	4	circRNA	ENSSSCT00000005347.2	5,4,3,2	chr1:159887139-159894749|chr1:159905970-159906702
chr1	159899220	159905970	-	3	circRNA	ENSSSCT00000005347.2	4,3,2	chr1:159894983-159899220|chr1:159905970-159906702
chr1	159904575	159905970	-	1	circRNA	ENSSSCT00000005347.2	2	chr1:159901920-159904575|chr1:159905970-159906702
chr1	159929663	159934310	-	4	circRNA	ENSSSCT00000005351.2	6,5,4,3	chr1:159926040-159929663|chr1:159934310-159935401
chr1	159929663	159936086	-	5	circRNA	ENSSSCT00000005351.2	6,5,4,3,2	chr1:159926040-159929663|chr1:159936086-159938671
chr1	161054127	161058128	+	3	circRNA	ENSSSCT00000005359.2	9,10,11	chr1:161050691-161054127|chr1:161058128-161061353
chr1	161056361	161058128	+	2	circRNA	ENSSSCT00000005359.2	10,11	chr1:161054605-161056361|chr1:161058128-161061353
chr1	161192140	161193203	-	3	circRNA	ENSSSCT00000024292.1	22,21,20	chr1:161180899-161192140|chr1:161193203-161194395
chr1	161192140	161194504	-	4	circRNA	ENSSSCT00000024292.1	22,21,20,19	chr1:161180899-161192140|chr1:161194504-161199572
chr1	161192140	161204051	-	8	circRNA	ENSSSCT00000024292.1	22,21,20,19,18,17,16,15	chr1:161180899-161192140|chr1:161204051-161219333
chr1	161192140	161220652	-	11	circRNA	ENSSSCT00000024292.1	22,21,20,19,18,17,16,15,14,13,12	chr1:161180899-161192140|chr1:161220652-161224495
chr1	161192983	161204051	-	6	circRNA	ENSSSCT00000024292.1	20,19,18,17,16,15	chr1:161192521-161192983|chr1:161204051-161219333
chr1	161194395	161204051	-	5	circRNA	ENSSSCT00000024292.1	19,18,17,16,15	chr1:161193203-161194395|chr1:161204051-161219333
chr1	161194395	161224772	-	9	circRNA	ENSSSCT00000024292.1	19,18,17,16,15,14,13,12,11	chr1:161193203-161194395|chr1:161224772-161225469
chr1	161199572	161220652	-	7	circRNA	ENSSSCT00000024292.1	18,17,16,15,14,13,12	chr1:161194504-161199572|chr1:161220652-161224495
chr1	161224495	161224772	-	1	circRNA	ENSSSCT00000024292.1	11	chr1:161220652-161224495|chr1:161224772-161225469
chr1	161224495	161253222	-	10	circRNA	ENSSSCT00000024292.1	11,10,9,8,7,6,5,4,3,2	chr1:161220652-161224495|chr1:161253222-161283787
chr1	161538321	161550700	-	4	circRNA	ENSSSCT00000005362.2	18,17,16,15	chr1:161528494-161538321|chr1:161550700-161556045
chr1	161542333	161550700	-	3	circRNA	ENSSSCT00000005362.2	17,16,15	chr1:161538454-161542333|chr1:161550700-161556045
chr1	161666254	161704214	-	3	circRNA	ENSSSCT00000005363.2	13,12,11	chr1:161612444-161666254|chr1:161704214-161713075
chr1	161666254	161781848	-	11	circRNA	ENSSSCT00000005360.2	12,11,10,9,8,7,6,5,4,3,2	chr1:161612444-161666254|chr1:161781848-161792760
chr1	161699775	161713156	-	3	circRNA	ENSSSCT00000005363.2	12,11,10	chr1:161666415-161699775|chr1:161713156-161725477
chr1	161699775	161725572	-	4	circRNA	ENSSSCT00000005363.2	12,11,10,9	chr1:161666415-161699775|chr1:161725572-161745225
chr1	161699775	161745277	-	5	circRNA	ENSSSCT00000005363.2	12,11,10,9,8	chr1:161666415-161699775|chr1:161745277-161752060
chr1	161699775	161752119	-	6	circRNA	ENSSSCT00000005363.2	12,11,10,9,8,7	chr1:161666415-161699775|chr1:161752119-161765501
chr1	161699775	161765610	-	7	circRNA	ENSSSCT00000005363.2	12,11,10,9,8,7,6	chr1:161666415-161699775|chr1:161765610-161768719
chr1	161704138	161765610	-	6	circRNA	ENSSSCT00000005363.2	11,10,9,8,7,6	chr1:161699852-161704138|chr1:161765610-161768719
chr1	161713075	161745277	-	3	circRNA	ENSSSCT00000005363.2	10,9,8	chr1:161704214-161713075|chr1:161745277-161752060
chr1	161713075	161765610	-	5	circRNA	ENSSSCT00000005363.2	10,9,8,7,6	chr1:161704214-161713075|chr1:161765610-161768719
chr1	161725477	161765610	-	4	circRNA	ENSSSCT00000005363.2	9,8,7,6	chr1:161713156-161725477|chr1:161765610-161768719
chr1	161725477	161771667	-	6	circRNA	ENSSSCT00000005363.2	9,8,7,6,5,4	chr1:161713156-161725477|chr1:161771667-161781674
chr1	161725477	161781848	-	7	circRNA	ENSSSCT00000005360.2	8,7,6,5,4,3,2	chr1:161713156-161725477|chr1:161781848-161792760
chr1	161745225	161765610	-	3	circRNA	ENSSSCT00000005363.2	8,7,6	chr1:161725572-161745225|chr1:161765610-161768719
chr1	161752060	161781848	-	5	circRNA	ENSSSCT00000005360.2	6,5,4,3,2	chr1:161745277-161752060|chr1:161781848-161792760
chr1	161765501	161771667	-	3	circRNA	ENSSSCT00000005363.2	6,5,4	chr1:161752119-161765501|chr1:161771667-161781674
chr1	161765501	161781848	-	4	circRNA	ENSSSCT00000005360.2	5,4,3,2	chr1:161752119-161765501|chr1:161781848-161792760
chr1	163294247	163295299	-	2	circRNA	ENSSSCT00000025136.1	11,10	chr1:163291038-163294247|chr1:163295299-163301979
chr1	163301979	163304446	-	2	circRNA	ENSSSCT00000025136.1	9,8	chr1:163295299-163301979|chr1:163304446-163311322
chr1	163311322	163318403	-	5	circRNA	ENSSSCT00000025136.1	7,6,5,4,3	chr1:163304446-163311322|chr1:163318403-163327113
chr1	170767318	170768956	+	3	circRNA	ENSSSCT00000005390.2	7,8,9	chr1:170764463-170767318|chr1:170768956-170772990
chr1	170776264	170784594	+	5	circRNA	ENSSSCT00000005390.2	11,12,13,14,15	chr1:170773089-170776264|chr1:170784594-170786145
chr1	172966399	172974843	+	2	circRNA	ENSSSCT00000005391.2	10,11	chr1:172963487-172966399|chr1:172974843-172998991
chr1	173618717	173632145	+	4	circRNA	ENSSSCT00000005392.2	5,6,7,8	chr1:173599519-173618717|chr1:173632145-173635525
chr1	173618717	173635777	+	5	circRNA	ENSSSCT00000005392.2	5,6,7,8,9	chr1:173599519-173618717|chr1:173635777-173662442
chr1	173629385	173635777	+	4	circRNA	ENSSSCT00000005392.2	6,7,8,9	chr1:173618971-173629385|chr1:173635777-173662442
chr1	175580336	175583766	-	2	circRNA	ENSSSCT00000005399.2	5,4	chr1:175576751-175580336|chr1:175583766-175587207
chr1	175587207	175588657	-	2	circRNA	ENSSSCT00000005399.2	3,2	chr1:175583766-175587207|chr1:175588657-175589116
chr1	175780780	175796474	+	5	circRNA	ENSSSCT00000031522.1	2,3,4,5,6	chr1:175775573-175780780|chr1:175796474-175802695
chr1	175788755	175802779	+	4	circRNA	ENSSSCT00000031522.1	4,5,6,7	chr1:175783392-175788755|chr1:175802779-175806530
chr1	175796282	175802779	+	2	circRNA	ENSSSCT00000031522.1	6,7	chr1:175789107-175796282|chr1:175802779-175806530
chr1	175796282	175806614	+	3	circRNA	ENSSSCT00000031522.1	6,7,8	chr1:175789107-175796282|chr1:175806614-175809697
chr1	176124368	176127623	-	2	circRNA	ENSSSCT00000005402.2	15,14	chr1:176121586-176124368|chr1:176127623-176136998
chr1	176142564	176156456	-	2	circRNA	ENSSSCT00000005402.2	12,11	chr1:176137103-176142564|chr1:176156456-176159550
chr1	176156293	176159751	-	2	circRNA	ENSSSCT00000005402.2	11,10	chr1:176142695-176156293|chr1:176159751-176170426
chr1	176156293	176177307	-	5	circRNA	ENSSSCT00000005402.2	11,10,9,8,7	chr1:176142695-176156293|chr1:176177307-176179706
chr1	176156293	176186618	-	8	circRNA	ENSSSCT00000005402.2	11,10,9,8,7,6,5,4	chr1:176142695-176156293|chr1:176186618-176208696
chr1	176156293	176208863	-	9	circRNA	ENSSSCT00000005402.2	11,10,9,8,7,6,5,4,3	chr1:176142695-176156293|chr1:176208863-176227874
chr1	176170426	176179909	-	4	circRNA	ENSSSCT00000005402.2	9,8,7,6	chr1:176159751-176170426|chr1:176179909-176185363
chr1	176170426	176186618	-	6	circRNA	ENSSSCT00000005402.2	9,8,7,6,5,4	chr1:176159751-176170426|chr1:176186618-176208696
chr1	176170426	176208863	-	7	circRNA	ENSSSCT00000005402.2	9,8,7,6,5,4,3	chr1:176159751-176170426|chr1:176208863-176227874
chr1	176208696	176228000	-	2	circRNA	ENSSSCT00000005402.2	3,2	chr1:176186618-176208696|chr1:176228000-176234683
chr1	176376706	176389232	+	3	circRNA	ENSSSCT00000005403.2	2,3,4	chr1:176374440-176376706|chr1:176389232-176392075
chr1	176376706	176394308	+	5	circRNA	ENSSSCT00000005403.2	2,3,4,5,6	chr1:176374440-176376706|chr1:176394308-176396542
chr1	176386092	176394308	+	4	circRNA	ENSSSCT00000005403.2	3,4,5,6	chr1:176376778-176386092|chr1:176394308-176396542
chr1	176389137	176394308	+	3	circRNA	ENSSSCT00000005403.2	4,5,6	chr1:176386205-176389137|chr1:176394308-176396542
chr1	176389137	176396678	+	4	circRNA	ENSSSCT00000005403.2	4,5,6,7	chr1:176386205-176389137|chr1:176396678-176398595
chr1	176389137	176399133	+	6	circRNA	ENSSSCT00000005403.2	4,5,6,7,8,9	chr1:176386205-176389137|chr1:176399133-176404013
chr1	176394250	176399133	+	4	circRNA	ENSSSCT00000005403.2	6,7,8,9	chr1:176392159-176394250|chr1:176399133-176404013
chr1	176408411	176409898	+	2	circRNA	ENSSSCT00000005403.2	11,12	chr1:176404142-176408411|chr1:176409898-176410816
chr1	176608397	176610341	-	3	circRNA	ENSSSCT00000028414.1	10,9,8	chr1:176596087-176608397|chr1:176610341-176614008
chr1	176679868	176725812	-	17	circRNA	ENSSSCT00000005405.2	27,26,25,24,23,22,21,20,19,18,17,16,15,14,13,12,11	chr1:176674820-176679868|chr1:176725812-176738720
chr1	176688298	176725812	-	15	circRNA	ENSSSCT00000005405.2	25,24,23,22,21,20,19,18,17,16,15,14,13,12,11	chr1:176683490-176688298|chr1:176725812-176738720
chr1	176695146	176725812	-	12	circRNA	ENSSSCT00000005405.2	22,21,20,19,18,17,16,15,14,13,12,11	chr1:176690198-176695146|chr1:176725812-176738720
chr1	176695146	176761238	-	21	circRNA	ENSSSCT00000005405.2	22,21,20,19,18,17,16,15,14,13,12,11,10,9,8,7,6,5,4,3,2	chr1:176690198-176695146|chr1:176761238-176780528
chr1	176699509	176725812	-	10	circRNA	ENSSSCT00000005405.2	20,19,18,17,16,15,14,13,12,11	chr1:176696323-176699509|chr1:176725812-176738720
chr1	176704620	176716763	-	6	circRNA	ENSSSCT00000005405.2	18,17,16,15,14,13	chr1:176702494-176704620|chr1:176716763-176719643
chr1	176704620	176742136	-	11	circRNA	ENSSSCT00000005405.2	18,17,16,15,14,13,12,11,10,9,8	chr1:176702494-176704620|chr1:176742136-176743083
chr1	176709916	176725812	-	6	circRNA	ENSSSCT00000005405.2	16,15,14,13,12,11	chr1:176705498-176709916|chr1:176725812-176738720
chr1	176712181	176725812	-	5	circRNA	ENSSSCT00000005405.2	15,14,13,12,11	chr1:176710064-176712181|chr1:176725812-176738720
chr1	176738720	176752498	-	8	circRNA	ENSSSCT00000005405.2	10,9,8,7,6,5,4,3	chr1:176725812-176738720|chr1:176752498-176761148
chr1	176738720	176761238	-	9	circRNA	ENSSSCT00000005405.2	10,9,8,7,6,5,4,3,2	chr1:176725812-176738720|chr1:176761238-176780528
chr1	176740563	176742136	-	2	circRNA	ENSSSCT00000005405.2	9,8	chr1:176738816-176740563|chr1:176742136-176743083
chr1	176752031	176761238	-	4	circRNA	ENSSSCT00000005405.2	5,4,3,2	chr1:176743484-176752031|chr1:176761238-176780528
chr1	176789553	176792357	+	2	circRNA	ENSSSCT00000005407.2	2,3	chr1:176781692-176789553|chr1:176792357-176794812
chr1	176789553	176794911	+	3	circRNA	ENSSSCT00000005407.2	2,3,4	chr1:176781692-176789553|chr1:176794911-176797177
chr1	176789553	176797284	+	4	circRNA	ENSSSCT00000005407.2	2,3,4,5	chr1:176781692-176789553|chr1:176797284-176802140
chr1	176792235	176797284	+	3	circRNA	ENSSSCT00000005407.2	3,4,5	chr1:176789806-176792235|chr1:176797284-176802140
chr1	176794812	176797284	+	2	circRNA	ENSSSCT00000005407.2	4,5	chr1:176792357-176794812|chr1:176797284-176802140
chr1	176794812	176815836	+	9	circRNA	ENSSSCT00000005407.2	4,5,6,7,8,9,10,11,12	chr1:176792357-176794812|chr1:176815836-176827025
chr1	176805304	176815836	+	6	circRNA	ENSSSCT00000005407.2	7,8,9,10,11,12	chr1:176802265-176805304|chr1:176815836-176827025
chr1	176805304	176846376	+	15	circRNA	ENSSSCT00000005407.2	7,8,9,10,11,12,13,14,15,16,17,18,19,20,21	chr1:176802265-176805304|chr1:176846376-176853032
chr1	176806313	176815836	+	5	circRNA	ENSSSCT00000005407.2	8,9,10,11,12	chr1:176805435-176806313|chr1:176815836-176827025
chr1	176814882	176833339	+	5	circRNA	ENSSSCT00000005407.2	11,12,13,14,15	chr1:176813255-176814882|chr1:176833339-176836674
chr1	176827025	176833339	+	3	circRNA	ENSSSCT00000005407.2	13,14,15	chr1:176815836-176827025|chr1:176833339-176836674
chr1	176833199	176853135	+	8	circRNA	ENSSSCT00000005407.2	15,16,17,18,19,20,21,22	chr1:176828209-176833199|chr1:176853135-176855012
chr1	176836674	176838127	+	3	circRNA	ENSSSCT00000005407.2	16,17,18	chr1:176833339-176836674|chr1:176838127-176840710
chr1	176836674	176840819	+	4	circRNA	ENSSSCT00000005407.2	16,17,18,19	chr1:176833339-176836674|chr1:176840819-176843907
chr1	176836674	176846376	+	6	circRNA	ENSSSCT00000005407.2	16,17,18,19,20,21	chr1:176833339-176836674|chr1:176846376-176853032
chr1	176840710	176846376	+	3	circRNA	ENSSSCT00000005407.2	19,20,21	chr1:176838127-176840710|chr1:176846376-176853032
chr1	176840710	176855454	+	8	circRNA	ENSSSCT00000005407.2	19,20,21,22,23,24,25,26	chr1:176838127-176840710|chr1:176855454-176857603
chr1	176840710	176864548	+	11	circRNA	ENSSSCT00000005407.2	19,20,21,22,23,24,25,26,27,28,29	chr1:176838127-176840710|chr1:176864548-176878724
chr1	176843907	176855454	+	7	circRNA	ENSSSCT00000005407.2	20,21,22,23,24,25,26	chr1:176840819-176843907|chr1:176855454-176857603
chr1	176846273	176857677	+	7	circRNA	ENSSSCT00000005407.2	21,22,23,24,25,26,27	chr1:176844016-176846273|chr1:176857677-176861876
chr1	176853032	176855454	+	5	circRNA	ENSSSCT00000005407.2	22,23,24,25,26	chr1:176846376-176853032|chr1:176855454-176857603
chr1	176853032	176864548	+	8	circRNA	ENSSSCT00000005407.2	22,23,24,25,26,27,28,29	chr1:176846376-176853032|chr1:176864548-176878724
chr1	176855012	176855454	+	4	circRNA	ENSSSCT00000005407.2	23,24,25,26	chr1:176853135-176855012|chr1:176855454-176857603
chr1	179099937	179102403	+	2	circRNA	ENSSSCT00000005413.2	4,5	chr1:179092002-179099937|chr1:179102403-179112746
chr1	179189036	179190143	+	3	circRNA	ENSSSCT00000005415.2	2,3,4	chr1:179185268-179189036|chr1:179190143-179191403
chr1	179189036	179194209	+	5	circRNA	ENSSSCT00000005415.2	2,3,4,5,6	chr1:179185268-179189036|chr1:179194209-179196286
chr1	179189036	179198483	+	8	circRNA	ENSSSCT00000005415.2	2,3,4,5,6,7,8,9	chr1:179185268-179189036|chr1:179198483-179198614
chr1	179189036	179198685	+	9	circRNA	ENSSSCT00000005415.2	2,3,4,5,6,7,8,9,10	chr1:179185268-179189036|chr1:179198685-179203269
chr1	179194085	179198685	+	5	circRNA	ENSSSCT00000005415.2	6,7,8,9,10	chr1:179191503-179194085|chr1:179198685-179203269
chr1	179194085	179203423	+	6	circRNA	ENSSSCT00000005415.2	6,7,8,9,10,11	chr1:179191503-179194085|chr1:179203423-179205641
chr1	179196286	179196885	+	2	circRNA	ENSSSCT00000005415.2	7,8	chr1:179194209-179196286|chr1:179196885-179198289
chr1	179196286	179198685	+	4	circRNA	ENSSSCT00000005415.2	7,8,9,10	chr1:179194209-179196286|chr1:179198685-179203269
chr1	179196345	179196724	+	1	ciRNA	ENSSSCT00000005415.2	7	chr1:179196345-179196752
chr1	179319832	179330240	+	2	circRNA	ENSSSCT00000005418.1	6,7	chr1:179318551-179319832|chr1:179330240-179337911
chr1	179392203	179396847	+	3	circRNA	ENSSSCT00000005420.2	3,4,5	chr1:179389263-179392203|chr1:179396847-179397463
chr1	179692259	179695026	+	2	circRNA	ENSSSCT00000005425.2	14,15	chr1:179691673-179692259|chr1:179695026-179697054
chr1	179692259	179699136	+	4	circRNA	ENSSSCT00000005425.2	14,15,16,17	chr1:179691673-179692259|chr1:179699136-179700719
chr1	179850162	179856151	+	2	circRNA	ENSSSCT00000005427.2	4,5	chr1:179810664-179850162|chr1:179856151-179860560
chr1	179860560	179877666	+	6	circRNA	ENSSSCT00000005427.2	6,7,8,9,10,11	chr1:179856151-179860560|chr1:179877666-179891085
chr1	179860788	179865984	+	3	circRNA	ENSSSCT00000005427.2	7,8,9	chr1:179860688-179860788|chr1:179865984-179872333
chr1	179860788	179877666	+	5	circRNA	ENSSSCT00000005427.2	7,8,9,10,11	chr1:179860688-179860788|chr1:179877666-179891085
chr1	179872333	179877666	+	2	circRNA	ENSSSCT00000005427.2	10,11	chr1:179865984-179872333|chr1:179877666-179891085
chr1	179974929	179981667	-	4	circRNA	ENSSSCT00000005428.2	24,23,22,21	chr1:179968414-179974929|chr1:179981667-179984070
chr1	179979993	179981667	-	2	circRNA	ENSSSCT00000005428.2	22,21	chr1:179977637-179979993|chr1:179981667-179984070
chr1	180703755	180737438	-	11	circRNA	ENSSSCT00000005437.2	12,11,10,9,8,7,6,5,4,3,2	chr1:180700010-180703755|chr1:180737438-180746937
chr1	180708439	180715180	-	5	circRNA	ENSSSCT00000005437.2	10,9,8,7,6	chr1:180705635-180708439|chr1:180715180-180723020
chr1	180708439	180723180	-	6	circRNA	ENSSSCT00000005437.2	10,9,8,7,6,5	chr1:180705635-180708439|chr1:180723180-180725339
chr1	180713360	180715180	-	3	circRNA	ENSSSCT00000005437.2	8,7,6	chr1:180712391-180713360|chr1:180715180-180723020
chr1	180714490	180715180	-	2	circRNA	ENSSSCT00000005437.2	7,6	chr1:180713449-180714490|chr1:180715180-180723020
chr1	180714490	180723180	-	3	circRNA	ENSSSCT00000005437.2	7,6,5	chr1:180713449-180714490|chr1:180723180-180725339
chr1	180723020	180725494	-	2	circRNA	ENSSSCT00000005437.2	5,4	chr1:180715180-180723020|chr1:180725494-180736415
chr1	180723020	180736533	-	3	circRNA	ENSSSCT00000005437.2	5,4,3	chr1:180715180-180723020|chr1:180736533-180737277
chr1	180723020	180737438	-	4	circRNA	ENSSSCT00000005437.2	5,4,3,2	chr1:180715180-180723020|chr1:180737438-180746937
chr1	180725339	180736533	-	2	circRNA	ENSSSCT00000005437.2	4,3	chr1:180723180-180725339|chr1:180736533-180737277
chr1	180736415	180737438	-	2	circRNA	ENSSSCT00000005437.2	3,2	chr1:180725494-180736415|chr1:180737438-180746937
chr1	180775535	180775601	-	1	ciRNA	ENSSSCT00000005438.2	2	chr1:180773345-180775601
chr1	180825238	180828351	-	2	circRNA	ENSSSCT00000005439.2	3,2	chr1:180822404-180825238|chr1:180828351-180893598
chr1	180980387	180980911	-	3	circRNA	ENSSSCT00000025179.1	15,14,13	chr1:180978265-180980387|chr1:180980911-180982416
chr1	180980387	180983496	-	5	circRNA	ENSSSCT00000025179.1	15,14,13,12,11	chr1:180978265-180980387|chr1:180983496-180984042
chr1	180980387	180985917	-	7	circRNA	ENSSSCT00000005441.2	12,11,10,9,8,7,6	chr1:180978265-180980387|chr1:180985917-180989520
chr1	180980387	180998696	-	12	circRNA	ENSSSCT00000025179.1	15,14,13,12,11,10,9,8,7,6,5,4	chr1:180978265-180980387|chr1:180998696-180999915
chr1	180982416	180985917	-	5	circRNA	ENSSSCT00000005441.2	10,9,8,7,6	chr1:180980911-180982416|chr1:180985917-180989520
chr1	180982416	180998696	-	9	circRNA	ENSSSCT00000025179.1	12,11,10,9,8,7,6,5,4	chr1:180980911-180982416|chr1:180998696-180999915
chr1	180985713	180985761	-	1	ciRNA	ENSSSCT00000025179.1	8	chr1:180985120-180985761
chr1	180989520	180998696	-	3	circRNA	ENSSSCT00000025179.1	6,5,4	chr1:180987262-180989520|chr1:180998696-180999915
chr1	181028803	181029908	-	2	circRNA	ENSSSCT00000005445.2	19,18	chr1:181025218-181028803|chr1:181029908-181031655
chr1	181029765	181051996	-	9	circRNA	ENSSSCT00000005445.2	18,17,16,15,14,13,12,11,10	chr1:181028915-181029765|chr1:181051996-181052676
chr1	181029765	181055410	-	11	circRNA	ENSSSCT00000005445.2	18,17,16,15,14,13,12,11,10,9,8	chr1:181028915-181029765|chr1:181055410-181057329
chr1	181031655	181051996	-	8	circRNA	ENSSSCT00000005445.2	17,16,15,14,13,12,11,10	chr1:181029908-181031655|chr1:181051996-181052676
chr1	181031655	181055410	-	10	circRNA	ENSSSCT00000005445.2	17,16,15,14,13,12,11,10,9,8	chr1:181029908-181031655|chr1:181055410-181057329
chr1	181041195	181046448	-	4	circRNA	ENSSSCT00000005445.2	15,14,13,12	chr1:181033165-181041195|chr1:181046448-181050308
chr1	181041195	181050468	-	5	circRNA	ENSSSCT00000005445.2	15,14,13,12,11	chr1:181033165-181041195|chr1:181050468-181051818
chr1	181041195	181052777	-	7	circRNA	ENSSSCT00000005445.2	15,14,13,12,11,10,9	chr1:181033165-181041195|chr1:181052777-181055348
chr1	181041195	181059423	-	10	circRNA	ENSSSCT00000005445.2	15,14,13,12,11,10,9,8,7,6	chr1:181033165-181041195|chr1:181059423-181066518
chr1	181041195	181077882	-	13	circRNA	ENSSSCT00000005445.2	15,14,13,12,11,10,9,8,7,6,5,4,3	chr1:181033165-181041195|chr1:181077882-181086915
chr1	181043370	181055410	-	6	circRNA	ENSSSCT00000005445.2	13,12,11,10,9,8	chr1:181042900-181043370|chr1:181055410-181057329
chr1	181046368	181089889	-	12	circRNA	ENSSSCT00000035110.1	13,12,11,10,9,8,7,6,5,4,3,2	chr1:181043523-181046368|chr1:181089889-181091588
chr1	181050308	181055410	-	4	circRNA	ENSSSCT00000005445.2	11,10,9,8	chr1:181046448-181050308|chr1:181055410-181057329
chr1	181050308	181059423	-	6	circRNA	ENSSSCT00000005445.2	11,10,9,8,7,6	chr1:181046448-181050308|chr1:181059423-181066518
chr1	181050308	181089889	-	11	circRNA	ENSSSCT00000035110.1	12,11,10,9,8,7,6,5,4,3,2	chr1:181046448-181050308|chr1:181089889-181091588
chr1	181051818	181055410	-	3	circRNA	ENSSSCT00000005445.2	10,9,8	chr1:181050468-181051818|chr1:181055410-181057329
chr1	181051818	181057458	-	4	circRNA	ENSSSCT00000005445.2	10,9,8,7	chr1:181050468-181051818|chr1:181057458-181059312
chr1	181051818	181059423	-	5	circRNA	ENSSSCT00000005445.2	10,9,8,7,6	chr1:181050468-181051818|chr1:181059423-181066518
chr1	181051818	181087185	-	9	circRNA	ENSSSCT00000005445.2	10,9,8,7,6,5,4,3,2	chr1:181050468-181051818|chr1:181087185-181089752
chr1	181051818	181089889	-	10	circRNA	ENSSSCT00000035110.1	11,10,9,8,7,6,5,4,3,2	chr1:181050468-181051818|chr1:181089889-181091588
chr1	181055348	181059423	-	3	circRNA	ENSSSCT00000005445.2	8,7,6	chr1:181052777-181055348|chr1:181059423-181066518
chr1	181055348	181066687	-	4	circRNA	ENSSSCT00000005445.2	8,7,6,5	chr1:181052777-181055348|chr1:181066687-181067902
chr1	181055348	181068076	-	5	circRNA	ENSSSCT00000005445.2	8,7,6,5,4	chr1:181052777-181055348|chr1:181068076-181077769
chr1	181057329	181066687	-	3	circRNA	ENSSSCT00000005445.2	7,6,5	chr1:181055410-181057329|chr1:181066687-181067902
chr1	181059312	181066687	-	2	circRNA	ENSSSCT00000005445.2	6,5	chr1:181057458-181059312|chr1:181066687-181067902
chr1	181059312	181068076	-	3	circRNA	ENSSSCT00000005445.2	6,5,4	chr1:181057458-181059312|chr1:181068076-181077769
chr1	181059312	181089889	-	6	circRNA	ENSSSCT00000035110.1	7,6,5,4,3,2	chr1:181057458-181059312|chr1:181089889-181091588
chr1	181066518	181068076	-	2	circRNA	ENSSSCT00000005445.2	5,4	chr1:181059423-181066518|chr1:181068076-181077769
chr1	181066518	181077882	-	3	circRNA	ENSSSCT00000005445.2	5,4,3	chr1:181059423-181066518|chr1:181077882-181086915
chr1	181066518	181089889	-	5	circRNA	ENSSSCT00000035110.1	6,5,4,3,2	chr1:181059423-181066518|chr1:181089889-181091588
chr1	181116228	181121580	+	4	circRNA	ENSSSCT00000005446.2	2,3,4,5	chr1:181100560-181116228|chr1:181121580-181122515
chr1	181116228	181124272	+	7	circRNA	ENSSSCT00000005446.2	2,3,4,5,6,7,8	chr1:181100560-181116228|chr1:181124272-181130812
chr1	181130812	181132464	+	2	circRNA	ENSSSCT00000005446.2	9,10	chr1:181124272-181130812|chr1:181132464-181134906
chr1	181130812	181135013	+	3	circRNA	ENSSSCT00000005446.2	9,10,11	chr1:181124272-181130812|chr1:181135013-181136139
chr1	181145446	181159028	-	4	circRNA	ENSSSCT00000030635.1	12,11,10,9	chr1:181143548-181145446|chr1:181159028-181161591
chr1	181145446	181161684	-	5	circRNA	ENSSSCT00000030635.1	12,11,10,9,8	chr1:181143548-181145446|chr1:181161684-181164407
chr1	181145446	181165093	-	7	circRNA	ENSSSCT00000030635.1	12,11,10,9,8,7,6	chr1:181143548-181145446|chr1:181165093-181166152
chr1	181145446	181172411	-	10	circRNA	ENSSSCT00000005447.2	11,10,9,8,7,6,5,4,3,2	chr1:181143548-181145446|chr1:181172411-181177083
chr1	181157214	181159028	-	2	circRNA	ENSSSCT00000030635.1	10,9	chr1:181147734-181157214|chr1:181159028-181161591
chr1	181157214	181161684	-	3	circRNA	ENSSSCT00000030635.1	10,9,8	chr1:181147734-181157214|chr1:181161684-181164407
chr1	181157214	181172411	-	8	circRNA	ENSSSCT00000005447.2	9,8,7,6,5,4,3,2	chr1:181147734-181157214|chr1:181172411-181177083
chr1	181161591	181169796	-	5	circRNA	ENSSSCT00000030635.1	8,7,6,5,4	chr1:181159028-181161591|chr1:181169796-181172127
chr1	181161591	181172411	-	6	circRNA	ENSSSCT00000005447.2	7,6,5,4,3,2	chr1:181159028-181161591|chr1:181172411-181177083
chr1	181164407	181172411	-	5	circRNA	ENSSSCT00000005447.2	6,5,4,3,2	chr1:181161684-181164407|chr1:181172411-181177083
chr1	181330430	181330850	-	2	circRNA	ENSSSCT00000005449.2	27,26	chr1:181329030-181330430|chr1:181330850-181332409
chr1	181330430	181332504	-	3	circRNA	ENSSSCT00000005449.2	27,26,25	chr1:181329030-181330430|chr1:181332504-181340020
chr1	181340020	181350023	-	4	circRNA	ENSSSCT00000005449.2	24,23,22,21	chr1:181332504-181340020|chr1:181350023-181353129
chr1	181348907	181350023	-	2	circRNA	ENSSSCT00000005449.2	22,21	chr1:181343891-181348907|chr1:181350023-181353129
chr1	181349906	181353955	-	4	circRNA	ENSSSCT00000005449.2	21,20,19,18	chr1:181349036-181349906|chr1:181353955-181354538
chr1	181373741	181382973	-	6	circRNA	ENSSSCT00000005449.2	13,12,11,10,9,8	chr1:181370919-181373741|chr1:181382973-181386203
chr1	181484716	181485339	-	2	circRNA	ENSSSCT00000024720.1	3,2	chr1:181479100-181484716|chr1:181485339-181492684
chr1	182079980	182082885	+	2	circRNA	ENSSSCT00000005453.2	3,4	chr1:182069838-182079980|chr1:182082885-182087602
chr1	182089380	182102452	+	9	circRNA	ENSSSCT00000005453.2	6,7,8,9,10,11,12,13,14	chr1:182087779-182089380|chr1:182102452-182105236
chr1	182114094	182120613	-	3	circRNA	ENSSSCT00000005454.2	7,6,5	chr1:182110929-182114094|chr1:182120613-182123144
chr1	182123602	182123942	-	2	circRNA	ENSSSCT00000005454.2	3,2	chr1:182123220-182123602|chr1:182123942-182125680
chr1	182227361	182228285	-	3	circRNA	ENSSSCT00000005457.2	7,6,5	chr1:182227089-182227361|chr1:182228285-182228684
chr1	182854629	182860290	+	4	circRNA	ENSSSCT00000005463.2	3,4,5,6	chr1:182853919-182854629|chr1:182860290-182883940
chr1	182855368	182860290	+	3	circRNA	ENSSSCT00000005463.2	4,5,6	chr1:182854820-182855368|chr1:182860290-182883940
chr1	182856035	182860290	+	2	circRNA	ENSSSCT00000005463.2	5,6	chr1:182855465-182856035|chr1:182860290-182883940
chr1	182860206	182884959	+	3	circRNA	ENSSSCT00000005463.2	6,7,8	chr1:182856125-182860206|chr1:182884959-182890160
chr1	182908617	182911527	-	2	circRNA	ENSSSCT00000005464.2	6,5	chr1:182905983-182908617|chr1:182911527-182921051
chr1	182911314	182911527	-	1	circRNA	ENSSSCT00000005464.2	5	chr1:182908755-182911314|chr1:182911527-182921051
chr1	183329728	183355267	+	4	circRNA	ENSSSCT00000036194.1	1,2,3,4	None|chr1:183355267-183362401
chr1	183329728	183362450	+	5	circRNA	ENSSSCT00000036194.1	1,2,3,4,5	None|chr1:183362450-183393406
chr1	183342471	183362450	+	4	circRNA	ENSSSCT00000024115.1	2,3,4,5	chr1:183329768-183342471|chr1:183362450-183393406
chr1	183810303	183835431	+	7	circRNA	ENSSSCT00000005470.2	2,3,4,5,6,7,8	chr1:183773535-183810303|chr1:183835431-183848391
chr1	183813972	183822002	+	4	circRNA	ENSSSCT00000005470.2	4,5,6,7	chr1:183810687-183813972|chr1:183822002-183835357
chr1	183813972	183835431	+	5	circRNA	ENSSSCT00000005470.2	4,5,6,7,8	chr1:183810687-183813972|chr1:183835431-183848391
chr1	183835357	183851512	+	4	circRNA	ENSSSCT00000005470.2	8,9,10,11	chr1:183822002-183835357|chr1:183851512-183856081
chr1	183970964	183976541	-	4	circRNA	ENSSSCT00000005473.3	17,16,15,14	chr1:183969353-183970964|chr1:183976541-183976829
chr1	184597871	184600439	-	3	circRNA	ENSSSCT00000005477.2	4,3,2	chr1:184596673-184597871|chr1:184600439-184601703
chr1	185076767	185077363	+	1	circRNA	ENSSSCT00000022924.1	2	chr1:184978941-185076767|chr1:185077363-185082369
chr1	185076767	185082615	+	2	circRNA	ENSSSCT00000022924.1	2,3	chr1:184978941-185076767|chr1:185082615-185088217
chr1	185283214	185286221	+	3	circRNA	ENSSSCT00000005481.2	7,8,9	chr1:185282319-185283214|chr1:185286221-185287778
chr1	186645419	186650267	-	2	circRNA	ENSSSCT00000005485.2	15,14	chr1:186643555-186645419|chr1:186650267-186651442
chr1	186645419	186656477	-	4	circRNA	ENSSSCT00000005485.2	15,14,13,12	chr1:186643555-186645419|chr1:186656477-186657165
chr1	186650214	186657838	-	5	circRNA	ENSSSCT00000005485.2	14,13,12,11,10	chr1:186648158-186650214|chr1:186657838-186659158
chr1	186650214	186659227	-	6	circRNA	ENSSSCT00000005485.2	14,13,12,11,10,9	chr1:186648158-186650214|chr1:186659227-186662396
chr1	186651442	186657838	-	4	circRNA	ENSSSCT00000005485.2	13,12,11,10	chr1:186650267-186651442|chr1:186657838-186659158
chr1	186651442	186659227	-	5	circRNA	ENSSSCT00000005485.2	13,12,11,10,9	chr1:186650267-186651442|chr1:186659227-186662396
chr1	186656378	186657838	-	3	circRNA	ENSSSCT00000005485.2	12,11,10	chr1:186651479-186656378|chr1:186657838-186659158
chr1	186656378	186659227	-	4	circRNA	ENSSSCT00000005485.2	12,11,10,9	chr1:186651479-186656378|chr1:186659227-186662396
chr1	186656378	186676356	-	11	circRNA	ENSSSCT00000005485.2	12,11,10,9,8,7,6,5,4,3,2	chr1:186651479-186656378|chr1:186676356-186680678
chr1	186656378	186680812	-	12	circRNA	ENSSSCT00000005485.2	12,11,10,9,8,7,6,5,4,3,2,1	chr1:186651479-186656378|None
chr1	186657165	186657838	-	2	circRNA	ENSSSCT00000005485.2	11,10	chr1:186656477-186657165|chr1:186657838-186659158
chr1	186657165	186659227	-	3	circRNA	ENSSSCT00000005485.2	11,10,9	chr1:186656477-186657165|chr1:186659227-186662396
chr1	186671655	186680812	-	4	circRNA	ENSSSCT00000005485.2	4,3,2,1	chr1:186666175-186671655|None
chr1	187609941	187610044	-	1	circRNA	ENSSSCT00000023869.1	2	chr1:187487573-187609941|chr1:187610044-187622810
chr1	188021787	188027071	+	3	circRNA	ENSSSCT00000005492.2	3,4,5	chr1:187876507-188021787|chr1:188027071-188034164
chr1	188119161	188121283	-	2	circRNA	ENSSSCT00000005491.2	12,11	chr1:188117340-188119161|chr1:188121283-188122074
chr1	188121166	188122298	-	2	circRNA	ENSSSCT00000005491.2	11,10	chr1:188119350-188121166|chr1:188122298-188124079
chr1	188122074	188127728	-	3	circRNA	ENSSSCT00000005491.2	10,9,8	chr1:188121283-188122074|chr1:188127728-188136036
chr1	188136743	188142438	-	2	circRNA	ENSSSCT00000005491.2	6,5	chr1:188136252-188136743|chr1:188142438-188143621
chr1	188136743	188147699	-	5	circRNA	ENSSSCT00000005491.2	6,5,4,3,2	chr1:188136252-188136743|chr1:188147699-188148555
chr1	188249905	188257098	-	4	circRNA	ENSSSCT00000005496.2	20,19,18,17	chr1:188246139-188249905|chr1:188257098-188260852
chr1	188250719	188257098	-	3	circRNA	ENSSSCT00000005496.2	19,18,17	chr1:188249941-188250719|chr1:188257098-188260852
chr1	188256959	188265251	-	5	circRNA	ENSSSCT00000005496.2	17,16,15,14,13	chr1:188252364-188256959|chr1:188265251-188269421
chr1	188260852	188270345	-	6	circRNA	ENSSSCT00000005496.2	16,15,14,13,12,11	chr1:188257098-188260852|chr1:188270345-188271234
chr1	188260852	188277219	-	10	circRNA	ENSSSCT00000005496.2	16,15,14,13,12,11,10,9,8,7	chr1:188257098-188260852|chr1:188277219-188279564
chr1	188407961	188408907	-	4	circRNA	ENSSSCT00000022515.1	6,5,4,3	chr1:188406243-188407961|chr1:188408907-188410251
chr1	188418092	188420669	+	3	circRNA	ENSSSCT00000005500.2	2,3,4	chr1:188414417-188418092|chr1:188420669-188423054
chr1	188418092	188423148	+	4	circRNA	ENSSSCT00000005500.2	2,3,4,5	chr1:188414417-188418092|chr1:188423148-188424701
chr1	188443659	188457952	-	7	circRNA	ENSSSCT00000005498.2	9,8,7,6,5,4,3	chr1:188436890-188443659|chr1:188457952-188460519
chr1	188443659	188460604	-	8	circRNA	ENSSSCT00000005498.2	9,8,7,6,5,4,3,2	chr1:188436890-188443659|chr1:188460604-188460973
chr1	188446977	188451019	-	3	circRNA	ENSSSCT00000005498.2	8,7,6	chr1:188443718-188446977|chr1:188451019-188453298
chr1	188446977	188457952	-	6	circRNA	ENSSSCT00000005498.2	8,7,6,5,4,3	chr1:188443718-188446977|chr1:188457952-188460519
chr1	188450974	188457952	-	4	circRNA	ENSSSCT00000005498.2	6,5,4,3	chr1:188449109-188450974|chr1:188457952-188460519
chr1	188527871	188537364	+	6	circRNA	ENSSSCT00000030475.1	7,8,9,10,11,12	chr1:188526982-188527871|chr1:188537364-188541118
chr1	188532965	188541257	+	5	circRNA	ENSSSCT00000030475.1	9,10,11,12,13	chr1:188528795-188532965|chr1:188541257-188545852
chr1	188552076	188559506	+	4	circRNA	ENSSSCT00000030475.1	17,18,19,20	chr1:188548311-188552076|chr1:188559506-188571551
chr1	194914169	194914694	+	1	circRNA	ENSSSCT00000005509.2	2	chr1:194911219-194914169|chr1:194914694-194917915
chr1	194914169	194918050	+	2	circRNA	ENSSSCT00000005509.2	2,3	chr1:194911219-194914169|chr1:194918050-194919347
chr1	194971697	194977887	-	2	circRNA	ENSSSCT00000005510.2	3,2	chr1:194969961-194971697|chr1:194977887-194997253
chr1	194976988	194977887	-	1	circRNA	ENSSSCT00000005510.2	2	chr1:194972141-194976988|chr1:194977887-194997253
chr1	195011670	195029660	+	6	circRNA	ENSSSCT00000025268.1	2,3,4,5,6,7	chr1:194999895-195011670|chr1:195029660-195034106
chr1	195020816	195021110	+	1	circRNA	ENSSSCT00000025268.1	4	chr1:195015057-195020816|chr1:195021110-195022522
chr1	195020816	195029660	+	4	circRNA	ENSSSCT00000025268.1	4,5,6,7	chr1:195015057-195020816|chr1:195029660-195034106
chr1	195020816	195034259	+	5	circRNA	ENSSSCT00000025268.1	4,5,6,7,8	chr1:195015057-195020816|chr1:195034259-195112532
chr1	195020816	195133308	+	14	circRNA	ENSSSCT00000025268.1	4,5,6,7,8,9,10,11,12,13,14,15,16,17	chr1:195015057-195020816|chr1:195133308-195135724
chr1	195022522	195026279	+	2	circRNA	ENSSSCT00000025268.1	5,6	chr1:195021110-195022522|chr1:195026279-195029559
chr1	195022522	195029660	+	3	circRNA	ENSSSCT00000025268.1	5,6,7	chr1:195021110-195022522|chr1:195029660-195034106
chr1	195022522	195115065	+	7	circRNA	ENSSSCT00000025268.1	5,6,7,8,9,10,11	chr1:195021110-195022522|chr1:195115065-195120469
chr1	195026046	195029660	+	2	circRNA	ENSSSCT00000025268.1	6,7	chr1:195022785-195026046|chr1:195029660-195034106
chr1	195029559	195034259	+	2	circRNA	ENSSSCT00000025268.1	7,8	chr1:195026279-195029559|chr1:195034259-195112532
chr1	195029559	195115065	+	5	circRNA	ENSSSCT00000025268.1	7,8,9,10,11	chr1:195026279-195029559|chr1:195115065-195120469
chr1	195029559	195133308	+	11	circRNA	ENSSSCT00000025268.1	7,8,9,10,11,12,13,14,15,16,17	chr1:195026279-195029559|chr1:195133308-195135724
chr1	195034106	195114161	+	3	circRNA	ENSSSCT00000025268.1	8,9,10	chr1:195029660-195034106|chr1:195114161-195114911
chr1	195034106	195138134	+	12	circRNA	ENSSSCT00000025268.1	8,9,10,11,12,13,14,15,16,17,18,19	chr1:195029660-195034106|chr1:195138134-195140777
chr1	195112532	195114161	+	2	circRNA	ENSSSCT00000025268.1	9,10	chr1:195034259-195112532|chr1:195114161-195114911
chr1	195112532	195115065	+	3	circRNA	ENSSSCT00000025268.1	9,10,11	chr1:195034259-195112532|chr1:195115065-195120469
chr1	195112532	195120623	+	4	circRNA	ENSSSCT00000025268.1	9,10,11,12	chr1:195034259-195112532|chr1:195120623-195126146
chr1	195112532	195135914	+	10	circRNA	ENSSSCT00000025268.1	9,10,11,12,13,14,15,16,17,18	chr1:195034259-195112532|chr1:195135914-195137914
chr1	195112532	195138134	+	11	circRNA	ENSSSCT00000025268.1	9,10,11,12,13,14,15,16,17,18,19	chr1:195034259-195112532|chr1:195138134-195140777
chr1	195113988	195115065	+	2	circRNA	ENSSSCT00000025268.1	10,11	chr1:195112631-195113988|chr1:195115065-195120469
chr1	195113988	195130686	+	7	circRNA	ENSSSCT00000025268.1	10,11,12,13,14,15,16	chr1:195112631-195113988|chr1:195130686-195133189
chr1	195114911	195133308	+	7	circRNA	ENSSSCT00000025268.1	11,12,13,14,15,16,17	chr1:195114161-195114911|chr1:195133308-195135724
chr1	195114911	195135914	+	8	circRNA	ENSSSCT00000025268.1	11,12,13,14,15,16,17,18	chr1:195114161-195114911|chr1:195135914-195137914
chr1	195133189	195138134	+	3	circRNA	ENSSSCT00000025268.1	17,18,19	chr1:195130686-195133189|chr1:195138134-195140777
chr1	195169048	195171383	+	3	circRNA	ENSSSCT00000005511.2	2,3,4	chr1:195153725-195169048|chr1:195171383-195174338
chr1	195169048	195174506	+	4	circRNA	ENSSSCT00000005511.2	2,3,4,5	chr1:195153725-195169048|chr1:195174506-195177454
chr1	195169048	195177620	+	5	circRNA	ENSSSCT00000005511.2	2,3,4,5,6	chr1:195153725-195169048|chr1:195177620-195178059
chr1	195169048	195178170	+	6	circRNA	ENSSSCT00000005511.2	2,3,4,5,6,7	chr1:195153725-195169048|chr1:195178170-195179687
chr1	195174338	195178170	+	3	circRNA	ENSSSCT00000005511.2	5,6,7	chr1:195171383-195174338|chr1:195178170-195179687
chr1	195174338	195179852	+	4	circRNA	ENSSSCT00000005511.2	5,6,7,8	chr1:195171383-195174338|chr1:195179852-195180166
chr1	195174338	195180293	+	5	circRNA	ENSSSCT00000005511.2	5,6,7,8,9	chr1:195171383-195174338|chr1:195180293-195180915
chr1	195177454	195178170	+	2	circRNA	ENSSSCT00000005511.2	6,7	chr1:195174506-195177454|chr1:195178170-195179687
chr1	195179687	195180293	+	2	circRNA	ENSSSCT00000005511.2	8,9	chr1:195178170-195179687|chr1:195180293-195180915
chr1	195188813	195189760	-	2	circRNA	ENSSSCT00000005513.2	3,2	chr1:195187374-195188813|chr1:195189760-195190063
chr1	195208520	195211514	+	2	circRNA	ENSSSCT00000005514.2	5,6	chr1:195207457-195208520|chr1:195211514-195216175
chr1	195221429	195244121	-	10	circRNA	ENSSSCT00000005515.2	23,22,21,20,19,18,17,16,15,14	chr1:195220393-195221429|chr1:195244121-195246156
chr1	195242227	195244121	-	1	circRNA	ENSSSCT00000005515.2	14	chr1:195238469-195242227|chr1:195244121-195246156
chr1	195242227	195248057	-	3	circRNA	ENSSSCT00000005515.2	14,13,12	chr1:195238469-195242227|chr1:195248057-195252558
chr1	195247899	195281214	-	10	circRNA	ENSSSCT00000005515.2	12,11,10,9,8,7,6,5,4,3	chr1:195246312-195247899|chr1:195281214-195285408
chr1	195255824	195277691	-	7	circRNA	ENSSSCT00000005515.2	10,9,8,7,6,5,4	chr1:195252772-195255824|chr1:195277691-195281136
chr1	199855388	199856110	+	1	circRNA	ENSSSCT00000005520.2	2	chr1:199852633-199855388|chr1:199856110-199859241
chr1	199949091	199953014	+	3	circRNA	ENSSSCT00000005525.2	2,3,4	chr1:199946317-199949091|chr1:199953014-199953573
chr1	199949091	199953915	+	5	circRNA	ENSSSCT00000005525.2	2,3,4,5,6	chr1:199946317-199949091|chr1:199953915-199954612
chr1	199950611	199953014	+	2	circRNA	ENSSSCT00000005525.2	3,4	chr1:199949171-199950611|chr1:199953014-199953573
chr1	199953573	199955795	+	6	circRNA	ENSSSCT00000005525.2	5,6,7,8,9,10	chr1:199953014-199953573|chr1:199955795-199957057
chr1	199959800	199960204	-	3	circRNA	ENSSSCT00000005527.2	32,31,30	chr1:199959409-199959800|chr1:199960204-199961228
chr1	199959800	199971098	-	10	circRNA	ENSSSCT00000005527.2	32,31,30,29,28,27,26,25,24,23	chr1:199959409-199959800|chr1:199971098-199972500
chr1	199960103	199971098	-	8	circRNA	ENSSSCT00000005527.2	30,29,28,27,26,25,24,23	chr1:199960006-199960103|chr1:199971098-199972500
chr1	199962718	199971098	-	6	circRNA	ENSSSCT00000005527.2	28,27,26,25,24,23	chr1:199961261-199962718|chr1:199971098-199972500
chr1	199966225	199969184	-	3	circRNA	ENSSSCT00000005527.2	26,25,24	chr1:199963129-199966225|chr1:199969184-199970821
chr1	199966225	199971098	-	4	circRNA	ENSSSCT00000005527.2	26,25,24,23	chr1:199963129-199966225|chr1:199971098-199972500
chr1	199966225	199973280	-	7	circRNA	ENSSSCT00000005527.2	26,25,24,23,22,21,20	chr1:199963129-199966225|chr1:199973280-199975067
chr1	199966225	199990936	-	18	circRNA	ENSSSCT00000005527.2	26,25,24,23,22,21,20,19,18,17,16,15,14,13,12,11,10,9	chr1:199963129-199966225|chr1:199990936-199991718
chr1	199969141	199990327	-	14	circRNA	ENSSSCT00000005527.2	24,23,22,21,20,19,18,17,16,15,14,13,12,11	chr1:199968988-199969141|chr1:199990327-199990710
chr1	199984967	199990936	-	8	circRNA	ENSSSCT00000005527.2	16,15,14,13,12,11,10,9	chr1:199981092-199984967|chr1:199990936-199991718
chr1	199984967	200000535	-	13	circRNA	ENSSSCT00000005527.2	16,15,14,13,12,11,10,9,8,7,6,5,4	chr1:199981092-199984967|chr1:200000535-200004456
chr1	199987182	200000535	-	12	circRNA	ENSSSCT00000005527.2	15,14,13,12,11,10,9,8,7,6,5,4	chr1:199985056-199987182|chr1:200000535-200004456
chr1	199987522	199990936	-	6	circRNA	ENSSSCT00000005527.2	14,13,12,11,10,9	chr1:199987246-199987522|chr1:199990936-199991718
chr1	199987952	199990327	-	3	circRNA	ENSSSCT00000005527.2	13,12,11	chr1:199987714-199987952|chr1:199990327-199990710
chr1	199991718	199996043	-	4	circRNA	ENSSSCT00000005527.2	8,7,6,5	chr1:199990936-199991718|chr1:199996043-200000409
chr1	199993106	200004746	-	6	circRNA	ENSSSCT00000005527.2	7,6,5,4,3,2	chr1:199991792-199993106|chr1:200004746-200005606
chr1	199994879	200000535	-	3	circRNA	ENSSSCT00000005527.2	6,5,4	chr1:199993193-199994879|chr1:200000535-200004456
chr1	200269188	200270003	-	2	circRNA	ENSSSCT00000005531.2	22,21	chr1:200268885-200269188|chr1:200270003-200272560
chr1	200269188	200272677	-	3	circRNA	ENSSSCT00000005531.2	22,21,20	chr1:200268885-200269188|chr1:200272677-200276115
chr1	200269188	200277626	-	5	circRNA	ENSSSCT00000005531.2	22,21,20,19,18	chr1:200268885-200269188|chr1:200277626-200281376
chr1	200269188	200281803	-	7	circRNA	ENSSSCT00000005531.2	22,21,20,19,18,17,16	chr1:200268885-200269188|chr1:200281803-200287461
chr1	200269188	200290416	-	9	circRNA	ENSSSCT00000005531.2	22,21,20,19,18,17,16,15,14	chr1:200268885-200269188|chr1:200290416-200296261
chr1	200269188	200298109	-	11	circRNA	ENSSSCT00000005531.2	22,21,20,19,18,17,16,15,14,13,12	chr1:200268885-200269188|chr1:200298109-200299008
chr1	200272560	200298109	-	9	circRNA	ENSSSCT00000005531.2	20,19,18,17,16,15,14,13,12	chr1:200270003-200272560|chr1:200298109-200299008
chr1	200276115	200281803	-	4	circRNA	ENSSSCT00000005531.2	19,18,17,16	chr1:200272677-200276115|chr1:200281803-200287461
chr1	200276115	200287684	-	5	circRNA	ENSSSCT00000005531.2	19,18,17,16,15	chr1:200272677-200276115|chr1:200287684-200290312
chr1	200277508	200290416	-	5	circRNA	ENSSSCT00000005531.2	18,17,16,15,14	chr1:200276288-200277508|chr1:200290416-200296261
chr1	200281376	200287684	-	3	circRNA	ENSSSCT00000005531.2	17,16,15	chr1:200277626-200281376|chr1:200287684-200290312
chr1	200281376	200298109	-	6	circRNA	ENSSSCT00000005531.2	17,16,15,14,13,12	chr1:200277626-200281376|chr1:200298109-200299008
chr1	200281683	200290416	-	3	circRNA	ENSSSCT00000005531.2	16,15,14	chr1:200281539-200281683|chr1:200290416-200296261
chr1	200287461	200287684	-	1	circRNA	ENSSSCT00000005531.2	15	chr1:200281803-200287461|chr1:200287684-200290312
chr1	200287461	200290416	-	2	circRNA	ENSSSCT00000005531.2	15,14	chr1:200281803-200287461|chr1:200290416-200296261
chr1	200287461	200298109	-	4	circRNA	ENSSSCT00000005531.2	15,14,13,12	chr1:200281803-200287461|chr1:200298109-200299008
chr1	200287461	200299664	-	5	circRNA	ENSSSCT00000005531.2	15,14,13,12,11	chr1:200281803-200287461|chr1:200299664-200300326
chr1	200287461	200334231	-	11	circRNA	ENSSSCT00000005531.2	15,14,13,12,11,10,9,8,7,6,5	chr1:200281803-200287461|chr1:200334231-200335699
chr1	200290312	200299664	-	4	circRNA	ENSSSCT00000005531.2	14,13,12,11	chr1:200287684-200290312|chr1:200299664-200300326
chr1	200290312	200328539	-	9	circRNA	ENSSSCT00000005531.2	14,13,12,11,10,9,8,7,6	chr1:200287684-200290312|chr1:200328539-200334066
chr1	200296261	200300454	-	4	circRNA	ENSSSCT00000005531.2	13,12,11,10	chr1:200290416-200296261|chr1:200300454-200310791
chr1	200298027	200299664	-	2	circRNA	ENSSSCT00000005531.2	12,11	chr1:200296384-200298027|chr1:200299664-200300326
chr1	200298027	200300454	-	3	circRNA	ENSSSCT00000005531.2	12,11,10	chr1:200296384-200298027|chr1:200300454-200310791
chr1	200299008	200299664	-	1	circRNA	ENSSSCT00000005531.2	11	chr1:200298109-200299008|chr1:200299664-200300326
chr1	200299008	200334231	-	7	circRNA	ENSSSCT00000005531.2	11,10,9,8,7,6,5	chr1:200298109-200299008|chr1:200334231-200335699
chr1	200300326	200334231	-	6	circRNA	ENSSSCT00000005531.2	10,9,8,7,6,5	chr1:200299664-200300326|chr1:200334231-200335699
chr1	200310791	200334231	-	5	circRNA	ENSSSCT00000005531.2	9,8,7,6,5	chr1:200300454-200310791|chr1:200334231-200335699
chr1	200310791	200338610	-	7	circRNA	ENSSSCT00000005531.2	9,8,7,6,5,4,3	chr1:200300454-200310791|chr1:200338610-200355720
chr1	200325281	200338610	-	5	circRNA	ENSSSCT00000005531.2	7,6,5,4,3	chr1:200314753-200325281|chr1:200338610-200355720
chr1	200328335	200338610	-	4	circRNA	ENSSSCT00000005531.2	6,5,4,3	chr1:200325425-200328335|chr1:200338610-200355720
chr1	200427413	200435305	-	4	circRNA	ENSSSCT00000005534.2	7,6,5,4	chr1:200425409-200427413|chr1:200435305-200437621
chr1	200703766	200721973	-	3	circRNA	ENSSSCT00000005537.2	4,3,2	chr1:200698186-200703766|chr1:200721973-200724351
chr1	200721529	200721973	-	1	circRNA	ENSSSCT00000005537.2	2	chr1:200707164-200721529|chr1:200721973-200724351
chr1	200779614	200789350	-	4	circRNA	ENSSSCT00000005538.2	35,34,33,32	chr1:200774770-200779614|chr1:200789350-200790737
chr1	200790737	200811725	-	14	circRNA	ENSSSCT00000005538.2	31,30,29,28,27,26,25,24,23,22,21,20,19,18	chr1:200789350-200790737|chr1:200811725-200813607
chr1	200800826	200809106	-	7	circRNA	ENSSSCT00000005538.2	27,26,25,24,23,22,21	chr1:200798067-200800826|chr1:200809106-200811118
chr1	200811586	200826043	-	11	circRNA	ENSSSCT00000005538.2	18,17,16,15,14,13,12,11,10,9,8	chr1:200811573-200811586|chr1:200826043-200840059
chr1	200840059	200871554	-	6	circRNA	ENSSSCT00000005538.2	7,6,5,4,3,2	chr1:200826043-200840059|chr1:200871554-200871671
chr1	201223747	201230161	+	6	circRNA	ENSSSCT00000028405.1	2,3,4,5,6,7	chr1:201220513-201223747|chr1:201230161-201233666
chr1	201225538	201230161	+	5	circRNA	ENSSSCT00000028405.1	3,4,5,6,7	chr1:201223863-201225538|chr1:201230161-201233666
chr1	201229726	201230161	+	3	circRNA	ENSSSCT00000028405.1	5,6,7	chr1:201227497-201229726|chr1:201230161-201233666
chr1	201664902	201671933	+	5	circRNA	ENSSSCT00000005543.2	2,3,4,5,6	chr1:201656342-201664902|chr1:201671933-201675720
chr1	201664902	201675876	+	6	circRNA	ENSSSCT00000005543.2	2,3,4,5,6,7	chr1:201656342-201664902|chr1:201675876-201679735
chr1	201664902	201683339	+	9	circRNA	ENSSSCT00000005543.2	2,3,4,5,6,7,8,9,10	chr1:201656342-201664902|chr1:201683339-201688607
chr1	201668387	201671933	+	4	circRNA	ENSSSCT00000005543.2	3,4,5,6	chr1:201664993-201668387|chr1:201671933-201675720
chr1	201668387	201675876	+	5	circRNA	ENSSSCT00000005543.2	3,4,5,6,7	chr1:201664993-201668387|chr1:201675876-201679735
chr1	201979788	201984989	-	4	circRNA	ENSSSCT00000005546.2	21,20,19,18	chr1:201978874-201979788|chr1:201984989-201992756
chr1	201984869	202012502	-	5	circRNA	ENSSSCT00000005546.2	18,17,16,15,14	chr1:201984061-201984869|chr1:202012502-202014029
chr1	202012271	202016291	-	4	circRNA	ENSSSCT00000005546.2	14,13,12,11	chr1:201994974-202012271|chr1:202016291-202028409
chr1	202467277	202474119	-	3	circRNA	ENSSSCT00000005553.2	4,3,2	chr1:202455106-202467277|chr1:202474119-202588572
chr1	202490136	202497584	-	3	circRNA	ENSSSCT00000027583.1	4,3,2	chr1:202362395-202490136|chr1:202497584-202513333
chr1	202600869	202615054	+	11	circRNA	ENSSSCT00000005554.2	2,3,4,5,6,7,8,9,10,11,12	chr1:202599839-202600869|chr1:202615054-202618969
chr1	202605802	202609301	+	3	circRNA	ENSSSCT00000005554.2	5,6,7	chr1:202601383-202605802|chr1:202609301-202611389
chr1	202605802	202611451	+	4	circRNA	ENSSSCT00000005554.2	5,6,7,8	chr1:202601383-202605802|chr1:202611451-202611535
chr1	202605802	202611659	+	5	circRNA	ENSSSCT00000005554.2	5,6,7,8,9	chr1:202601383-202605802|chr1:202611659-202612263
chr1	202605802	202612325	+	6	circRNA	ENSSSCT00000005554.2	5,6,7,8,9,10	chr1:202601383-202605802|chr1:202612325-202614697
chr1	202605802	202619041	+	9	circRNA	ENSSSCT00000005554.2	5,6,7,8,9,10,11,12,13	chr1:202601383-202605802|chr1:202619041-202625002
chr1	202606368	202611659	+	4	circRNA	ENSSSCT00000005554.2	6,7,8,9	chr1:202605870-202606368|chr1:202611659-202612263
chr1	202609213	202611659	+	3	circRNA	ENSSSCT00000005554.2	7,8,9	chr1:202606483-202609213|chr1:202611659-202612263
chr1	202609213	202612325	+	4	circRNA	ENSSSCT00000005554.2	7,8,9,10	chr1:202606483-202609213|chr1:202612325-202614697
chr1	202611389	202611659	+	2	circRNA	ENSSSCT00000005554.2	8,9	chr1:202609301-202611389|chr1:202611659-202612263
chr1	202611389	202612325	+	3	circRNA	ENSSSCT00000005554.2	8,9,10	chr1:202609301-202611389|chr1:202612325-202614697
chr1	202611389	202619041	+	6	circRNA	ENSSSCT00000005554.2	8,9,10,11,12,13	chr1:202609301-202611389|chr1:202619041-202625002
chr1	202612263	202615054	+	3	circRNA	ENSSSCT00000005554.2	10,11,12	chr1:202611659-202612263|chr1:202615054-202618969
chr1	202612263	202619041	+	4	circRNA	ENSSSCT00000005554.2	10,11,12,13	chr1:202611659-202612263|chr1:202619041-202625002
chr1	202614697	202619041	+	3	circRNA	ENSSSCT00000005554.2	11,12,13	chr1:202612325-202614697|chr1:202619041-202625002
chr1	202644305	202655484	+	4	circRNA	ENSSSCT00000005555.2	2,3,4,5	chr1:202628523-202644305|chr1:202655484-202656403
chr1	202644305	202656440	+	5	circRNA	ENSSSCT00000005555.2	2,3,4,5,6	chr1:202628523-202644305|chr1:202656440-202656989
chr1	202644305	202657170	+	7	circRNA	ENSSSCT00000005555.2	2,3,4,5,6,7,8	chr1:202628523-202644305|chr1:202657170-202659248
chr1	202644305	202659321	+	8	circRNA	ENSSSCT00000005555.2	2,3,4,5,6,7,8,9	chr1:202628523-202644305|chr1:202659321-202671369
chr1	202644305	202671463	+	9	circRNA	ENSSSCT00000005555.2	2,3,4,5,6,7,8,9,10	chr1:202628523-202644305|chr1:202671463-202674728
chr1	202645929	202655484	+	3	circRNA	ENSSSCT00000005555.2	3,4,5	chr1:202644338-202645929|chr1:202655484-202656403
chr1	202645929	202659321	+	7	circRNA	ENSSSCT00000005555.2	3,4,5,6,7,8,9	chr1:202644338-202645929|chr1:202659321-202671369
chr1	202650919	202656440	+	3	circRNA	ENSSSCT00000005555.2	4,5,6	chr1:202645983-202650919|chr1:202656440-202656989
chr1	202650919	202657170	+	5	circRNA	ENSSSCT00000005555.2	4,5,6,7,8	chr1:202645983-202650919|chr1:202657170-202659248
chr1	202650919	202659321	+	6	circRNA	ENSSSCT00000005555.2	4,5,6,7,8,9	chr1:202645983-202650919|chr1:202659321-202671369
chr1	202655423	202659321	+	5	circRNA	ENSSSCT00000005555.2	5,6,7,8,9	chr1:202651017-202655423|chr1:202659321-202671369
chr1	202655423	202671463	+	6	circRNA	ENSSSCT00000005555.2	5,6,7,8,9,10	chr1:202651017-202655423|chr1:202671463-202674728
chr1	202656403	202659321	+	4	circRNA	ENSSSCT00000005555.2	6,7,8,9	chr1:202655484-202656403|chr1:202659321-202671369
chr1	202656403	202671463	+	5	circRNA	ENSSSCT00000005555.2	6,7,8,9,10	chr1:202655484-202656403|chr1:202671463-202674728
chr1	202656989	202671463	+	4	circRNA	ENSSSCT00000005555.2	7,8,9,10	chr1:202656440-202656989|chr1:202671463-202674728
chr1	202683162	202684493	-	2	circRNA	ENSSSCT00000005556.2	5,4	chr1:202681876-202683162|chr1:202684493-202686257
chr1	202686257	202688116	-	2	circRNA	ENSSSCT00000005556.2	3,2	chr1:202684493-202686257|chr1:202688116-202693791
chr1	202793117	202807301	-	6	circRNA	ENSSSCT00000005557.2	10,9,8,7,6,5	chr1:202791498-202793117|chr1:202807301-202809062
chr1	202793117	202809197	-	7	circRNA	ENSSSCT00000005557.2	10,9,8,7,6,5,4	chr1:202791498-202793117|chr1:202809197-202813228
chr1	202793117	202813336	-	8	circRNA	ENSSSCT00000005557.2	10,9,8,7,6,5,4,3	chr1:202791498-202793117|chr1:202813336-202815350
chr1	202797720	202798180	-	2	circRNA	ENSSSCT00000005557.2	8,7	chr1:202793993-202797720|chr1:202798180-202805858
chr1	202805858	202813336	-	4	circRNA	ENSSSCT00000005557.2	6,5,4,3	chr1:202798180-202805858|chr1:202813336-202815350
chr1	202809062	202813336	-	2	circRNA	ENSSSCT00000005557.2	4,3	chr1:202807301-202809062|chr1:202813336-202815350
chr1	202809062	202815453	-	3	circRNA	ENSSSCT00000005557.2	4,3,2	chr1:202807301-202809062|chr1:202815453-202815824
chr1	202944044	202948476	-	3	circRNA	ENSSSCT00000005559.2	11,10,9	chr1:202941276-202944044|chr1:202948476-202954151
chr1	202944044	202986161	-	10	circRNA	ENSSSCT00000005559.2	11,10,9,8,7,6,5,4,3,2	chr1:202941276-202944044|chr1:202986161-203017716
chr1	202948326	202986161	-	8	circRNA	ENSSSCT00000005559.2	9,8,7,6,5,4,3,2	chr1:202945660-202948326|chr1:202986161-203017716
chr1	202954151	202986161	-	7	circRNA	ENSSSCT00000005559.2	8,7,6,5,4,3,2	chr1:202948476-202954151|chr1:202986161-203017716
chr1	202963752	202986161	-	5	circRNA	ENSSSCT00000005559.2	6,5,4,3,2	chr1:202955895-202963752|chr1:202986161-203017716
chr1	202970027	202986161	-	4	circRNA	ENSSSCT00000005559.2	5,4,3,2	chr1:202963859-202970027|chr1:202986161-203017716
chr1	202974506	202986161	-	3	circRNA	ENSSSCT00000005559.2	4,3,2	chr1:202970134-202974506|chr1:202986161-203017716
chr1	204294174	204302395	+	4	circRNA	ENSSSCT00000005564.2	3,4,5,6	chr1:204292572-204294174|chr1:204302395-204302437
chr1	204553669	204554188	+	1	circRNA	ENSSSCT00000024259.1	2	chr1:204436900-204553669|chr1:204554188-204589049
chr1	204589049	204616092	+	5	circRNA	ENSSSCT00000024259.1	3,4,5,6,7	chr1:204554188-204589049|chr1:204616092-204621909
chr1	204600871	204616092	+	4	circRNA	ENSSSCT00000024259.1	4,5,6,7	chr1:204589313-204600871|chr1:204616092-204621909
chr1	204626262	204636086	+	3	circRNA	ENSSSCT00000024259.1	9,10,11	chr1:204622028-204626262|chr1:204636086-204640781
chr1	204783995	204798169	-	9	circRNA	ENSSSCT00000005569.2	22,21,20,19,18,17,16,15,14	chr1:204781297-204783995|chr1:204798169-204808001
chr1	204790934	204810712	-	7	circRNA	ENSSSCT00000005569.2	18,17,16,15,14,13,12	chr1:204788743-204790934|chr1:204810712-204814020
chr1	204797063	204798169	-	2	circRNA	ENSSSCT00000005569.2	15,14	chr1:204791617-204797063|chr1:204798169-204808001
chr1	204808001	204828419	-	7	circRNA	ENSSSCT00000005569.2	13,12,11,10,9,8,7	chr1:204798169-204808001|chr1:204828419-204828956
chr1	204819150	204828419	-	3	circRNA	ENSSSCT00000005569.2	9,8,7	chr1:204816658-204819150|chr1:204828419-204828956
chr1	204835342	204836699	-	3	circRNA	ENSSSCT00000005569.2	4,3,2	chr1:204830734-204835342|chr1:204836699-204841340
chr1	204986372	205008105	-	9	circRNA	ENSSSCT00000005573.2	16,15,14,13,12,11,10,9,8	chr1:204985266-204986372|chr1:205008105-205010754
chr1	204991472	205006687	-	6	circRNA	ENSSSCT00000005573.2	14,13,12,11,10,9	chr1:204989431-204991472|chr1:205006687-205007818
chr1	205002127	205003641	-	2	circRNA	ENSSSCT00000005573.2	12,11	chr1:204995712-205002127|chr1:205003641-205006062
chr1	205002127	205006687	-	4	circRNA	ENSSSCT00000005573.2	12,11,10,9	chr1:204995712-205002127|chr1:205006687-205007818
chr1	205010754	205015238	-	4	circRNA	ENSSSCT00000005573.2	7,6,5,4	chr1:205008105-205010754|chr1:205015238-205017545
chr1	205012670	205015238	-	3	circRNA	ENSSSCT00000005573.2	6,5,4	chr1:205010825-205012670|chr1:205015238-205017545
chr1	205012670	205017739	-	4	circRNA	ENSSSCT00000005573.2	6,5,4,3	chr1:205010825-205012670|chr1:205017739-205025791
chr1	205261251	205261506	-	2	circRNA	ENSSSCT00000005575.2	9,8	chr1:205253963-205261251|chr1:205261506-205265274
chr1	205261251	205267698	-	4	circRNA	ENSSSCT00000005575.2	9,8,7,6	chr1:205253963-205261251|chr1:205267698-205270708
chr1	205261251	205278002	-	7	circRNA	ENSSSCT00000005575.2	9,8,7,6,5,4,3	chr1:205253963-205261251|chr1:205278002-205280016
chr1	205265274	205267698	-	2	circRNA	ENSSSCT00000005575.2	7,6	chr1:205261506-205265274|chr1:205267698-205270708
chr1	205265274	205270946	-	3	circRNA	ENSSSCT00000005575.2	7,6,5	chr1:205261506-205265274|chr1:205270946-205275001
chr1	205265274	205280079	-	6	circRNA	ENSSSCT00000005575.2	7,6,5,4,3,2	chr1:205261506-205265274|chr1:205280079-205293691
chr1	205267468	205270946	-	2	circRNA	ENSSSCT00000005575.2	6,5	chr1:205265392-205267468|chr1:205270946-205275001
chr1	205465514	205472192	+	3	circRNA	ENSSSCT00000005577.2	2,3,4	chr1:205433130-205465514|chr1:205472192-205474829
chr1	205465514	205474960	+	4	circRNA	ENSSSCT00000005577.2	2,3,4,5	chr1:205433130-205465514|chr1:205474960-205481192
chr1	205465514	205488405	+	9	circRNA	ENSSSCT00000005577.2	2,3,4,5,6,7,8,9,10	chr1:205433130-205465514|chr1:205488405-205491489
chr1	205465514	205497543	+	18	circRNA	ENSSSCT00000005577.2	2,3,4,5,6,7,8,9,10,11,12,13,14,15,16,17,18,19	chr1:205433130-205465514|chr1:205497543-205502909
chr1	205465514	205522367	+	35	circRNA	ENSSSCT00000005577.2	2,3,4,5,6,7,8,9,10,11,12,13,14,15,16,17,18,19,20,21,22,23,24,25,26,27,28,29,30,31,32,33,34,35,36	chr1:205433130-205465514|chr1:205522367-205526772
chr1	205465514	205528254	+	39	circRNA	ENSSSCT00000005577.2	2,3,4,5,6,7,8,9,10,11,12,13,14,15,16,17,18,19,20,21,22,23,24,25,26,27,28,29,30,31,32,33,34,35,36,37,38,39,40	chr1:205433130-205465514|chr1:205528254-205529415
chr1	205472021	205474960	+	2	circRNA	ENSSSCT00000005577.2	4,5	chr1:205469372-205472021|chr1:205474960-205481192
chr1	205472021	205481309	+	3	circRNA	ENSSSCT00000005577.2	4,5,6	chr1:205469372-205472021|chr1:205481309-205484418
chr1	205472021	205484559	+	4	circRNA	ENSSSCT00000005577.2	4,5,6,7	chr1:205469372-205472021|chr1:205484559-205485939
chr1	205472021	205492135	+	9	circRNA	ENSSSCT00000005577.2	4,5,6,7,8,9,10,11,12	chr1:205469372-205472021|chr1:205492135-205493986
chr1	205472021	205494842	+	11	circRNA	ENSSSCT00000005577.2	4,5,6,7,8,9,10,11,12,13,14	chr1:205469372-205472021|chr1:205494842-205495468
chr1	205472021	205497543	+	16	circRNA	ENSSSCT00000005577.2	4,5,6,7,8,9,10,11,12,13,14,15,16,17,18,19	chr1:205469372-205472021|chr1:205497543-205502909
chr1	205472021	205502944	+	17	circRNA	ENSSSCT00000005577.2	4,5,6,7,8,9,10,11,12,13,14,15,16,17,18,19,20	chr1:205469372-205472021|chr1:205502944-205503349
chr1	205472021	205509435	+	27	circRNA	ENSSSCT00000005577.2	4,5,6,7,8,9,10,11,12,13,14,15,16,17,18,19,20,21,22,23,24,25,26,27,28,29,30	chr1:205469372-205472021|chr1:205509435-205511272
chr1	205472021	205513536	+	29	circRNA	ENSSSCT00000005577.2	4,5,6,7,8,9,10,11,12,13,14,15,16,17,18,19,20,21,22,23,24,25,26,27,28,29,30,31,32	chr1:205469372-205472021|chr1:205513536-205514615
chr1	205474829	205481309	+	2	circRNA	ENSSSCT00000005577.2	5,6	chr1:205472192-205474829|chr1:205481309-205484418
chr1	205481192	205488405	+	5	circRNA	ENSSSCT00000005577.2	6,7,8,9,10	chr1:205474960-205481192|chr1:205488405-205491489
chr1	205484418	205494842	+	8	circRNA	ENSSSCT00000005577.2	7,8,9,10,11,12,13,14	chr1:205481309-205484418|chr1:205494842-205495468
chr1	205484418	205496626	+	12	circRNA	ENSSSCT00000005577.2	7,8,9,10,11,12,13,14,15,16,17,18	chr1:205481309-205484418|chr1:205496626-205497474
chr1	205484418	205508425	+	23	circRNA	ENSSSCT00000005577.2	7,8,9,10,11,12,13,14,15,16,17,18,19,20,21,22,23,24,25,26,27,28,29	chr1:205481309-205484418|chr1:205508425-205509397
chr1	205485939	205492135	+	5	circRNA	ENSSSCT00000005577.2	8,9,10,11,12	chr1:205484559-205485939|chr1:205492135-205493986
chr1	205491489	205492135	+	2	circRNA	ENSSSCT00000005577.2	11,12	chr1:205488405-205491489|chr1:205492135-205493986
chr1	205493986	205526853	+	25	circRNA	ENSSSCT00000005577.2	13,14,15,16,17,18,19,20,21,22,23,24,25,26,27,28,29,30,31,32,33,34,35,36,37	chr1:205492135-205493986|chr1:205526853-205527785
chr1	205495468	205504202	+	8	circRNA	ENSSSCT00000005577.2	15,16,17,18,19,20,21,22	chr1:205494842-205495468|chr1:205504202-205505117
chr1	205502909	205530064	+	24	circRNA	ENSSSCT00000005577.2	20,21,22,23,24,25,26,27,28,29,30,31,32,33,34,35,36,37,38,39,40,41,42,43	chr1:205497543-205502909|chr1:205530064-205533035
chr1	205503349	205508280	+	8	circRNA	ENSSSCT00000005577.2	21,22,23,24,25,26,27,28	chr1:205502944-205503349|chr1:205508280-205508356
chr1	205504133	205516979	+	13	circRNA	ENSSSCT00000005577.2	22,23,24,25,26,27,28,29,30,31,32,33,34	chr1:205503440-205504133|chr1:205516979-205519019
chr1	205505846	205508280	+	5	circRNA	ENSSSCT00000005577.2	24,25,26,27,28	chr1:205505155-205505846|chr1:205508280-205508356
chr1	205508190	205508280	+	1	circRNA	ENSSSCT00000005577.2	28	chr1:205507344-205508190|chr1:205508280-205508356
chr1	205508190	205511363	+	4	circRNA	ENSSSCT00000005577.2	28,29,30,31	chr1:205507344-205508190|chr1:205511363-205513467
chr1	205508356	205511363	+	3	circRNA	ENSSSCT00000005577.2	29,30,31	chr1:205508280-205508356|chr1:205511363-205513467
chr1	205509397	205514653	+	4	circRNA	ENSSSCT00000005577.2	30,31,32,33	chr1:205508425-205509397|chr1:205514653-205516888
chr1	205511272	205522367	+	6	circRNA	ENSSSCT00000005577.2	31,32,33,34,35,36	chr1:205509435-205511272|chr1:205522367-205526772
chr1	205511272	205526853	+	7	circRNA	ENSSSCT00000005577.2	31,32,33,34,35,36,37	chr1:205509435-205511272|chr1:205526853-205527785
chr1	205516888	205526853	+	4	circRNA	ENSSSCT00000005577.2	34,35,36,37	chr1:205514653-205516888|chr1:205526853-205527785
chr1	205526772	205528254	+	4	circRNA	ENSSSCT00000005577.2	37,38,39,40	chr1:205522367-205526772|chr1:205528254-205529415
chr1	206194700	206195460	+	2	circRNA	ENSSSCT00000029724.1	4,5	chr1:206187146-206194700|chr1:206195460-206215996
chr1	206467750	206476787	+	4	circRNA	ENSSSCT00000005579.2	5,6,7,8	chr1:206466279-206467750|chr1:206476787-206478966
chr1	206471443	206479081	+	4	circRNA	ENSSSCT00000005579.2	6,7,8,9	chr1:206467864-206471443|chr1:206479081-206480680
chr1	206478966	206483871	+	3	circRNA	ENSSSCT00000005579.2	9,10,11	chr1:206476787-206478966|chr1:206483871-206486828
chr1	206483699	206495078	+	4	circRNA	ENSSSCT00000005579.2	11,12,13,14	chr1:206480850-206483699|chr1:206495078-206496923
chr1	206483699	206497014	+	5	circRNA	ENSSSCT00000005579.2	11,12,13,14,15	chr1:206480850-206483699|chr1:206497014-206501470
chr1	206962042	206985758	-	11	circRNA	ENSSSCT00000005583.2	15,14,13,12,11,10,9,8,7,6,5	chr1:206960246-206962042|chr1:206985758-206990527
chr1	206963839	206985758	-	10	circRNA	ENSSSCT00000005583.2	14,13,12,11,10,9,8,7,6,5	chr1:206962129-206963839|chr1:206985758-206990527
chr1	206977021	206985758	-	8	circRNA	ENSSSCT00000005583.2	12,11,10,9,8,7,6,5	chr1:206968061-206977021|chr1:206985758-206990527
chr1	206977021	206993410	-	12	circRNA	ENSSSCT00000005583.2	12,11,10,9,8,7,6,5,4,3,2,1	chr1:206968061-206977021|None
chr1	206978879	206980155	-	2	circRNA	ENSSSCT00000005583.2	11,10	chr1:206977169-206978879|chr1:206980155-206981233
chr1	206981556	206982042	-	1	ciRNA	ENSSSCT00000005583.2	7	chr1:206981530-206982042
chr1	206990527	206993410	-	4	circRNA	ENSSSCT00000005583.2	4,3,2,1	chr1:206985758-206990527|None
chr1	207015842	207018021	+	4	circRNA	ENSSSCT00000005582.2	3,4,5,6	chr1:207011412-207015842|chr1:207018021-207022372
chr1	207016863	207018021	+	3	circRNA	ENSSSCT00000005582.2	4,5,6	chr1:207016070-207016863|chr1:207018021-207022372
chr1	207016863	207022469	+	4	circRNA	ENSSSCT00000005582.2	4,5,6,7	chr1:207016070-207016863|chr1:207022469-207026675
chr1	208217448	208227424	+	5	circRNA	ENSSSCT00000030515.1	4,5,6,7,8	chr1:208216904-208217448|chr1:208227424-208231634
chr1	208219318	208222746	+	3	circRNA	ENSSSCT00000030515.1	5,6,7	chr1:208217557-208219318|chr1:208222746-208227388
chr1	208219318	208227424	+	4	circRNA	ENSSSCT00000030515.1	5,6,7,8	chr1:208217557-208219318|chr1:208227424-208231634
chr1	208251007	208261698	+	4	circRNA	ENSSSCT00000005589.2	2,3,4,5	chr1:208247245-208251007|chr1:208261698-208264641
chr1	208264641	208271965	+	4	circRNA	ENSSSCT00000005589.2	6,7,8,9	chr1:208261698-208264641|chr1:208271965-208273613
chr1	208265991	208271965	+	3	circRNA	ENSSSCT00000005589.2	7,8,9	chr1:208264714-208265991|chr1:208271965-208273613
chr1	208292448	208295366	+	3	circRNA	ENSSSCT00000005590.2	3,4,5	chr1:208290312-208292448|chr1:208295366-208304838
chr1	208292448	208305105	+	5	circRNA	ENSSSCT00000005590.2	3,4,5,6,7	chr1:208290312-208292448|chr1:208305105-208307044
chr1	208292448	208330783	+	13	circRNA	ENSSSCT00000005590.2	3,4,5,6,7,8,9,10,11,12,13,14,15	chr1:208290312-208292448|chr1:208330783-208334124
chr1	208294097	208305105	+	4	circRNA	ENSSSCT00000005590.2	4,5,6,7	chr1:208292559-208294097|chr1:208305105-208307044
chr1	208295275	208315461	+	7	circRNA	ENSSSCT00000005590.2	5,6,7,8,9,10,11	chr1:208294163-208295275|chr1:208315461-208328130
chr1	208304838	208315461	+	6	circRNA	ENSSSCT00000005590.2	6,7,8,9,10,11	chr1:208295366-208304838|chr1:208315461-208328130
chr1	208307044	208315461	+	4	circRNA	ENSSSCT00000005590.2	8,9,10,11	chr1:208305105-208307044|chr1:208315461-208328130
chr1	208307044	208337290	+	10	circRNA	ENSSSCT00000005590.2	8,9,10,11,12,13,14,15,16,17	chr1:208305105-208307044|chr1:208337290-208340335
chr1	208337092	208349034	+	6	circRNA	ENSSSCT00000005590.2	17,18,19,20,21,22	chr1:208334375-208337092|chr1:208349034-208349858
chr1	208343616	208349034	+	3	circRNA	ENSSSCT00000005590.2	20,21,22	chr1:208341400-208343616|chr1:208349034-208349858
chr1	208477064	208482603	+	3	circRNA	ENSSSCT00000026022.1	2,3,4	chr1:208474764-208477064|chr1:208482603-208486496
chr1	208501652	208513821	+	4	circRNA	ENSSSCT00000005594.2	5,6,7,8	chr1:208500657-208501652|chr1:208513821-208523213
chr1	209436101	209439080	-	2	circRNA	ENSSSCT00000005597.2	23,22	chr1:209435984-209436101|chr1:209439080-209440954
chr1	209439019	209460614	-	8	circRNA	ENSSSCT00000005597.2	22,21,20,19,18,17,16,15	chr1:209436233-209439019|chr1:209460614-209467392
chr1	209440954	209451835	-	5	circRNA	ENSSSCT00000005597.2	21,20,19,18,17	chr1:209439080-209440954|chr1:209451835-209459232
chr1	209440954	209459339	-	6	circRNA	ENSSSCT00000005597.2	21,20,19,18,17,16	chr1:209439080-209440954|chr1:209459339-209460584
chr1	209467392	209477248	-	11	circRNA	ENSSSCT00000005597.2	14,13,12,11,10,9,8,7,6,5,4	chr1:209460614-209467392|chr1:209477248-209482914
chr1	209470486	209474483	-	7	circRNA	ENSSSCT00000005597.2	11,10,9,8,7,6,5	chr1:209468797-209470486|chr1:209474483-209477153
chr1	209477153	209509739	-	3	circRNA	ENSSSCT00000005597.2	4,3,2	chr1:209474483-209477153|chr1:209509739-209531996
chr1	209531845	209531996	-	1	ciRNA	ENSSSCT00000005597.2	1	chr1:209509739-209531996
chr1	210246827	210248208	+	4	circRNA	ENSSSCT00000005601.2	2,3,4,5	chr1:210244046-210246827|chr1:210248208-210251696
chr1	210246827	210260930	+	8	circRNA	ENSSSCT00000005601.2	2,3,4,5,6,7,8,9	chr1:210244046-210246827|chr1:210260930-210272231
chr1	210247859	210248208	+	2	circRNA	ENSSSCT00000005601.2	4,5	chr1:210247613-210247859|chr1:210248208-210251696
chr1	210251696	210260930	+	4	circRNA	ENSSSCT00000005601.2	6,7,8,9	chr1:210248208-210251696|chr1:210260930-210272231
chr1	210254702	210260930	+	3	circRNA	ENSSSCT00000005601.2	7,8,9	chr1:210252057-210254702|chr1:210260930-210272231
chr1	210259052	210260930	+	2	circRNA	ENSSSCT00000005601.2	8,9	chr1:210254806-210259052|chr1:210260930-210272231
chr1	210857649	210869228	+	3	circRNA	ENSSSCT00000005610.2	3,4,5	chr1:210848289-210857649|chr1:210869228-210869270
chr1	211240366	211262362	+	7	circRNA	ENSSSCT00000005612.2	6,7,8,9,10,11,12	chr1:211228689-211240366|chr1:211262362-211266995
chr1	211250071	211292323	+	9	circRNA	ENSSSCT00000005612.2	7,8,9,10,11,12,13,14,15	chr1:211240445-211250071|chr1:211292323-211292506
chr1	211714939	211721306	+	6	circRNA	ENSSSCT00000005616.2	3,4,5,6,7,8	chr1:211713444-211714939|chr1:211721306-211745760
chr1	211717239	211792181	+	8	circRNA	ENSSSCT00000005616.2	4,5,6,7,8,9,10,11	chr1:211715069-211717239|chr1:211792181-211815009
chr1	212154209	212155215	+	3	circRNA	ENSSSCT00000005618.1	2,3,4	chr1:212131139-212154209|chr1:212155215-212159497
chr1	212154209	212160381	+	5	circRNA	ENSSSCT00000005618.1	2,3,4,5,6	chr1:212131139-212154209|chr1:212160381-212167863
chr1	212159610	212160153	+	1	ciRNA	ENSSSCT00000005618.1	5	chr1:212159610-212160178
chr1	212169280	212175049	+	5	circRNA	ENSSSCT00000005618.1	8,9,10,11,12	chr1:212167970-212169280|chr1:212175049-212177995
chr1	212171160	212172500	+	2	circRNA	ENSSSCT00000005618.1	9,10	chr1:212169428-212171160|chr1:212172500-212174367
chr1	212171160	212175049	+	4	circRNA	ENSSSCT00000005618.1	9,10,11,12	chr1:212169428-212171160|chr1:212175049-212177995
chr1	212177995	212178762	+	2	circRNA	ENSSSCT00000005618.1	13,14	chr1:212175049-212177995|chr1:212178762-212179499
chr1	212196048	212209687	+	7	circRNA	ENSSSCT00000005619.2	2,3,4,5,6,7,8	chr1:212192696-212196048|chr1:212209687-212215315
chr1	212702680	212712934	+	3	circRNA	ENSSSCT00000024154.2	2,3,4	chr1:212696472-212702680|chr1:212712934-212717306
chr1	215801324	215802704	-	2	circRNA	ENSSSCT00000029685.1	110109	chr1:215800124-215801324|chr1:215802704-215803692
chr1	215834257	215835424	-	2	circRNA	ENSSSCT00000029685.1	99,98	chr1:215820495-215834257|chr1:215835424-215838025
chr1	215834257	215838181	-	3	circRNA	ENSSSCT00000029685.1	99,98,97	chr1:215820495-215834257|chr1:215838181-215842255
chr1	215834257	215878211	-	20	circRNA	ENSSSCT00000029685.1	99,98,97,96,95,94,93,92,91,90,89,88,87,86,85,84,83,82,81,80	chr1:215820495-215834257|chr1:215878211-215880610
chr1	215866215	215869447	-	3	circRNA	ENSSSCT00000029685.1	87,86,85	chr1:215863577-215866215|chr1:215869447-215870952
chr1	215866215	216058003	-	83	circRNA	ENSSSCT00000029685.1	87,86,85,84,83,82,81,80,79,78,77,76,75,74,73,72,71,70,69,68,67,66,65,64,63,62,61,60,59,58,57,56,55,54,53,52,51,50,49,48,47,46,45,44,43,42,41,40,39,38,37,36,35,34,33,32,31,30,29,28,27,26,25,24,23,22,21,20,19,18,17,16,15,14,13,12,11,10,9,8,7,6,5	chr1:215863577-215866215|chr1:216058003-216062374
chr1	215870952	215895290	-	16	circRNA	ENSSSCT00000029685.1	84,83,82,81,80,79,78,77,76,75,74,73,72,71,70,69	chr1:215869447-215870952|chr1:215895290-215896103
chr1	215875361	215895290	-	14	circRNA	ENSSSCT00000029685.1	82,81,80,79,78,77,76,75,74,73,72,71,70,69	chr1:215873539-215875361|chr1:215895290-215896103
chr1	215878078	215885581	-	4	circRNA	ENSSSCT00000029685.1	80,79,78,77	chr1:215876106-215878078|chr1:215885581-215887679
chr1	215885410	215888149	-	3	circRNA	ENSSSCT00000029685.1	77,76,75	chr1:215884466-215885410|chr1:215888149-215889230
chr1	215885410	215895290	-	9	circRNA	ENSSSCT00000029685.1	77,76,75,74,73,72,71,70,69	chr1:215884466-215885410|chr1:215895290-215896103
chr1	215887679	215895290	-	8	circRNA	ENSSSCT00000029685.1	76,75,74,73,72,71,70,69	chr1:215885581-215887679|chr1:215895290-215896103
chr1	215922460	215948141	-	8	circRNA	ENSSSCT00000029685.1	56,55,54,53,52,51,50,49	chr1:215919519-215922460|chr1:215948141-215949224
chr1	215928389	215931829	-	3	circRNA	ENSSSCT00000029685.1	55,54,53	chr1:215922646-215928389|chr1:215931829-215934412
chr1	215947922	215949369	-	2	circRNA	ENSSSCT00000029685.1	49,48	chr1:215939345-215947922|chr1:215949369-215951704
chr1	215947922	215969543	-	7	circRNA	ENSSSCT00000029685.1	49,48,47,46,45,44,43	chr1:215939345-215947922|chr1:215969543-215972468
chr1	215969219	216017229	-	25	circRNA	ENSSSCT00000029685.1	43,42,41,40,39,38,37,36,35,34,33,32,31,30,29,28,27,26,25,24,23,22,21,20,19	chr1:215958529-215969219|chr1:216017229-216017527
chr1	215972468	215980400	-	6	circRNA	ENSSSCT00000029685.1	42,41,40,39,38,37	chr1:215969543-215972468|chr1:215980400-215981824
chr1	215980197	216027485	-	26	circRNA	ENSSSCT00000029685.1	37,36,35,34,33,32,31,30,29,28,27,26,25,24,23,22,21,20,19,18,17,16,15,14,13,12	chr1:215979543-215980197|chr1:216027485-216028340
chr1	215987388	215996485	-	4	circRNA	ENSSSCT00000029685.1	32,31,30,29	chr1:215984815-215987388|chr1:215996485-216002728
chr1	216017055	216017686	-	2	circRNA	ENSSSCT00000029685.1	19,18	chr1:216013431-216017055|chr1:216017686-216020903
chr1	216036129	216041172	-	3	circRNA	ENSSSCT00000029685.1	9,8,7	chr1:216029245-216036129|chr1:216041172-216048758
chr1	216606414	216611202	-	6	circRNA	ENSSSCT00000032151.1	7,6,5,4,3,2	chr1:216601830-216606414|chr1:216611202-216627986
chr1	216785976	216789011	+	2	circRNA	ENSSSCT00000025810.1	2,3	chr1:216775715-216785976|chr1:216789011-216796620
chr1	218187705	218215581	+	14	circRNA	ENSSSCT00000025893.1	6,7,8,9,10,11,12,13,14,15,16,17,18,19	chr1:218184513-218187705|chr1:218215581-218217881
chr1	218267352	218275353	-	5	circRNA	ENSSSCT00000005647.3	8,7,6,5,4	chr1:218252225-218267352|chr1:218275353-218285353
chr1	218268713	218275353	-	4	circRNA	ENSSSCT00000005647.3	7,6,5,4	chr1:218267497-218268713|chr1:218275353-218285353
chr1	218540055	218551385	-	5	circRNA	ENSSSCT00000005649.2	17,16,15,14,13	chr1:218536703-218540055|chr1:218551385-218566262
chr1	218540055	218575722	-	10	circRNA	ENSSSCT00000005649.2	17,16,15,14,13,12,11,10,9,8	chr1:218536703-218540055|chr1:218575722-218602319
chr1	218548516	218551385	-	3	circRNA	ENSSSCT00000005649.2	15,14,13	chr1:218540843-218548516|chr1:218551385-218566262
chr1	218548516	218566342	-	4	circRNA	ENSSSCT00000005649.2	15,14,13,12	chr1:218540843-218548516|chr1:218566342-218568533
chr1	218549683	218569925	-	5	circRNA	ENSSSCT00000005649.2	14,13,12,11,10	chr1:218548652-218549683|chr1:218569925-218573720
chr1	218549683	218573783	-	6	circRNA	ENSSSCT00000005649.2	14,13,12,11,10,9	chr1:218548652-218549683|chr1:218573783-218575583
chr1	218549683	218575722	-	7	circRNA	ENSSSCT00000005649.2	14,13,12,11,10,9,8	chr1:218548652-218549683|chr1:218575722-218602319
chr1	218551331	218575722	-	6	circRNA	ENSSSCT00000005649.2	13,12,11,10,9,8	chr1:218549781-218551331|chr1:218575722-218602319
chr1	218566262	218575722	-	5	circRNA	ENSSSCT00000005649.2	12,11,10,9,8	chr1:218551385-218566262|chr1:218575722-218602319
chr1	218568533	218575722	-	4	circRNA	ENSSSCT00000005649.2	11,10,9,8	chr1:218566342-218568533|chr1:218575722-218602319
chr1	218628715	218659510	+	10	circRNA	ENSSSCT00000005651.2	2,3,4,5,6,7,8,9,10,11	chr1:218624790-218628715|chr1:218659510-218662547
chr1	218647970	218659510	+	5	circRNA	ENSSSCT00000005651.2	7,8,9,10,11	chr1:218645233-218647970|chr1:218659510-218662547
chr1	218652316	218659510	+	4	circRNA	ENSSSCT00000005651.2	8,9,10,11	chr1:218648140-218652316|chr1:218659510-218662547
chr1	218662547	218666206	+	2	circRNA	ENSSSCT00000005651.2	12,13	chr1:218659510-218662547|chr1:218666206-218667406
chr1	218683997	218686093	+	3	circRNA	ENSSSCT00000005652.2	2,3,4	chr1:218678458-218683997|chr1:218686093-218700181
chr1	224091689	224111707	-	3	circRNA	ENSSSCT00000005663.2	6,5,4	chr1:224080019-224091689|chr1:224111707-224113401
chr1	224091689	224114675	-	5	circRNA	ENSSSCT00000005663.2	6,5,4,3,2	chr1:224080019-224091689|chr1:224114675-224115199
chr1	224095259	224114675	-	4	circRNA	ENSSSCT00000005663.2	5,4,3,2	chr1:224091929-224095259|chr1:224114675-224115199
chr1	224111539	224114675	-	3	circRNA	ENSSSCT00000005663.2	4,3,2	chr1:224095362-224111539|chr1:224114675-224115199
chr1	225561551	225565906	+	3	circRNA	ENSSSCT00000005693.2	8,9,10	chr1:225560371-225561551|chr1:225565906-225568537
chr1	225629379	225651027	-	3	circRNA	ENSSSCT00000030778.1	6,5,4	chr1:225622917-225629379|chr1:225651027-225657631
chr1	225740192	225751429	-	2	circRNA	ENSSSCT00000028872.1	11,10	chr1:225694820-225740192|chr1:225751429-225754532
chr1	225740192	225764571	-	5	circRNA	ENSSSCT00000028872.1	11,10,9,8,7	chr1:225694820-225740192|chr1:225764571-225771870
chr1	225740192	225791062	-	7	circRNA	ENSSSCT00000028872.1	11,10,9,8,7,6,5	chr1:225694820-225740192|chr1:225791062-225806226
chr1	225740192	225806381	-	8	circRNA	ENSSSCT00000028872.1	11,10,9,8,7,6,5,4	chr1:225694820-225740192|chr1:225806381-225808881
chr1	225740192	225808956	-	9	circRNA	ENSSSCT00000028872.1	11,10,9,8,7,6,5,4,3	chr1:225694820-225740192|chr1:225808956-225811777
chr1	225740192	225811866	-	10	circRNA	ENSSSCT00000028872.1	11,10,9,8,7,6,5,4,3,2	chr1:225694820-225740192|chr1:225811866-225842455
chr1	225751226	225764571	-	4	circRNA	ENSSSCT00000028872.1	10,9,8,7	chr1:225740450-225751226|chr1:225764571-225771870
chr1	225760489	225806381	-	5	circRNA	ENSSSCT00000028872.1	8,7,6,5,4	chr1:225754620-225760489|chr1:225806381-225808881
chr1	225764366	225791062	-	3	circRNA	ENSSSCT00000028872.1	7,6,5	chr1:225760696-225764366|chr1:225791062-225806226
chr1	225764366	225808956	-	5	circRNA	ENSSSCT00000028872.1	7,6,5,4,3	chr1:225760696-225764366|chr1:225808956-225811777
chr1	225771870	225808956	-	4	circRNA	ENSSSCT00000028872.1	6,5,4,3	chr1:225764571-225771870|chr1:225808956-225811777
chr1	225771870	225811866	-	5	circRNA	ENSSSCT00000028872.1	6,5,4,3,2	chr1:225764571-225771870|chr1:225811866-225842455
chr1	225790957	225806381	-	2	circRNA	ENSSSCT00000028872.1	5,4	chr1:225771972-225790957|chr1:225806381-225808881
chr1	225790957	225808956	-	3	circRNA	ENSSSCT00000028872.1	5,4,3	chr1:225771972-225790957|chr1:225808956-225811777
chr1	225790957	225811866	-	4	circRNA	ENSSSCT00000028872.1	5,4,3,2	chr1:225771972-225790957|chr1:225811866-225842455
chr1	225806226	225811866	-	3	circRNA	ENSSSCT00000028872.1	4,3,2	chr1:225791062-225806226|chr1:225811866-225842455
chr1	226060683	226118520	+	3	circRNA	ENSSSCT00000005694.2	3,4,5	chr1:225902009-226060683|chr1:226118520-226163140
chr1	226117818	226118520	+	1	circRNA	ENSSSCT00000005694.2	5	chr1:226070353-226117818|chr1:226118520-226163140
chr1	226163140	226177978	+	3	circRNA	ENSSSCT00000005694.2	6,7,8	chr1:226118520-226163140|chr1:226177978-226184725
chr1	226163216	226163242	+	1	ciRNA	ENSSSCT00000005694.2	6	chr1:226163216-226174899
chr1	227044101	227055172	-	4	circRNA	ENSSSCT00000030545.1	5,4,3,2	chr1:227039940-227044101|chr1:227055172-227065626
chr1	227048021	227055172	-	3	circRNA	ENSSSCT00000030545.1	4,3,2	chr1:227044239-227048021|chr1:227055172-227065626
chr1	227054160	227055172	-	2	circRNA	ENSSSCT00000030545.1	3,2	chr1:227048159-227054160|chr1:227055172-227065626
chr1	227095511	227096684	+	3	circRNA	ENSSSCT00000005698.2	2,3,4	chr1:227095411-227095511|chr1:227096684-227097740
chr1	227097740	227097898	+	1	circRNA	ENSSSCT00000005698.2	5	chr1:227096684-227097740|chr1:227097898-227098003
chr1	227102111	227126254	-	12	circRNA	ENSSSCT00000005700.2	34,33,32,31,30,29,28,27,26,25,24,23	chr1:227101903-227102111|chr1:227126254-227134785
chr1	227108367	227126254	-	7	circRNA	ENSSSCT00000005700.2	29,28,27,26,25,24,23	chr1:227105662-227108367|chr1:227126254-227134785
chr1	227111951	227126254	-	5	circRNA	ENSSSCT00000005700.2	27,26,25,24,23	chr1:227109305-227111951|chr1:227126254-227134785
chr1	227124800	227126254	-	3	circRNA	ENSSSCT00000005700.2	25,24,23	chr1:227113373-227124800|chr1:227126254-227134785
chr1	227124800	227139614	-	6	circRNA	ENSSSCT00000005700.2	25,24,23,22,21,20	chr1:227113373-227124800|chr1:227139614-227145144
chr1	227134785	227139614	-	3	circRNA	ENSSSCT00000005700.2	22,21,20	chr1:227126254-227134785|chr1:227139614-227145144
chr1	227134785	227145607	-	5	circRNA	ENSSSCT00000005700.2	22,21,20,19,18	chr1:227126254-227134785|chr1:227145607-227152126
chr1	227134785	227210811	-	21	circRNA	ENSSSCT00000005700.2	22,21,20,19,18,17,16,15,14,13,12,11,10,9,8,7,6,5,4,3,2	chr1:227126254-227134785|chr1:227210811-227250746
chr1	227138510	227210811	-	20	circRNA	ENSSSCT00000005700.2	21,20,19,18,17,16,15,14,13,12,11,10,9,8,7,6,5,4,3,2	chr1:227135942-227138510|chr1:227210811-227250746
chr1	227152126	227155059	-	2	circRNA	ENSSSCT00000005700.2	17,16	chr1:227145607-227152126|chr1:227155059-227157789
chr1	227152126	227166326	-	7	circRNA	ENSSSCT00000005700.2	17,16,15,14,13,12,11	chr1:227145607-227152126|chr1:227166326-227181486
chr1	227152126	227186649	-	10	circRNA	ENSSSCT00000005700.2	17,16,15,14,13,12,11,10,9,8	chr1:227145607-227152126|chr1:227186649-227188422
chr1	227157789	227159527	-	3	circRNA	ENSSSCT00000005700.2	15,14,13	chr1:227155059-227157789|chr1:227159527-227165197
chr1	227157789	227181662	-	6	circRNA	ENSSSCT00000005700.2	15,14,13,12,11,10	chr1:227155059-227157789|chr1:227181662-227185987
chr1	227159381	227166326	-	3	circRNA	ENSSSCT00000005700.2	13,12,11	chr1:227158044-227159381|chr1:227166326-227181486
chr1	227159381	227196042	-	10	circRNA	ENSSSCT00000005700.2	13,12,11,10,9,8,7,6,5,4	chr1:227158044-227159381|chr1:227196042-227197070
chr1	227165197	227165416	-	1	circRNA	ENSSSCT00000005700.2	12	chr1:227159527-227165197|chr1:227165416-227166225
chr1	227165197	227166326	-	2	circRNA	ENSSSCT00000005700.2	12,11	chr1:227159527-227165197|chr1:227166326-227181486
chr1	227165197	227186649	-	5	circRNA	ENSSSCT00000005700.2	12,11,10,9,8	chr1:227159527-227165197|chr1:227186649-227188422
chr1	227166225	227188489	-	5	circRNA	ENSSSCT00000005700.2	11,10,9,8,7	chr1:227165416-227166225|chr1:227188489-227189498
[truncated: 23,298 more rows]

## Sheet: B(circRNA_finder)
Prediction of circRNA candidates from rRNA-depleted libraries by circRNA_finder
Chrom	Start	End	Strand
chr1	253253	257333	-
chr1	949885	950146	+
chr1	970392	975495	+
chr1	985623	987945	+
chr1	985626	988691	+
chr1	1035495	1090971	-
chr1	1082075	1092178	-
chr1	1150938	1152805	+
chr1	1175728	1187482	+
chr1	2150621	2238552	-
chr1	2722311	2722620	-
chr1	2734733	2739505	-
chr1	2734733	2770778	-
chr1	2750751	2770778	-
chr1	2775860	2790071	-
chr1	2783965	2805628	-
chr1	2783965	2814551	-
chr1	2789913	2814551	-
chr1	2805467	2814551	-
chr1	2808656	2814551	-
chr1	3256430	3260484	-
chr1	3494060	3515767	+
chr1	3580936	3605794	+
chr1	3625427	3637802	+
chr1	3631438	3654211	+
chr1	3636066	3648716	+
chr1	3637676	3646543	+
chr1	3637676	3648716	+
chr1	3691542	3692404	+
chr1	3692034	3692393	+
chr1	3723522	3724089	+
chr1	4618741	4636526	+
chr1	4618741	4658081	+
chr1	4618741	4717643	+
chr1	4635855	4658081	+
chr1	4648181	4658081	+
chr1	4668015	4685558	+
chr1	6380623	6418025	-
chr1	6382896	6387521	-
chr1	6384645	6385507	-
chr1	6387476	6486326	-
chr1	6387569	6486221	-
chr1	6389140	6418134	-
chr1	6417990	6486326	-
chr1	6417990	6487163	-
chr1	6417990	6511411	-
chr1	6449092	6486326	-
chr1	6460849	6464985	-
chr1	6460849	6486326	-
chr1	6463386	6486326	-
chr1	6464279	6464577	-
chr1	6464868	6464985	-
chr1	6464868	6486326	-
chr1	6486183	6486326	-
chr1	6486183	6487548	-
chr1	6489275	6494890	-
chr1	6509454	6510190	-
chr1	6518494	6518619	-
chr1	7205363	7205468	+
chr1	7349778	7351646	+
chr1	8311683	8313224	+
chr1	8311683	8316039	+
chr1	8320798	8329647	+
chr1	8508284	8519889	-
chr1	8516351	8519889	-
chr1	8571770	8571991	+
chr1	8795510	8799832	-
chr1	8795510	8844270	-
chr1	8798656	8844270	-
chr1	8808425	8844270	-
chr1	8838521	8844270	-
chr1	9185005	9188014	-
chr1	9199130	9214761	-
chr1	9240838	9251868	-
chr1	9390839	9397250	+
chr1	9392358	9397924	+
chr1	9393569	9397339	+
chr1	9393569	9398731	+
chr1	9397163	9398731	+
chr1	9397800	9398731	+
chr1	9402655	9405279	-
chr1	9427898	9440203	-
chr1	9432505	9437448	-
chr1	9432505	9440203	-
chr1	9484814	9486654	+
chr1	9842038	9861085	-
chr1	9879915	9880091	-
chr1	10429640	10431453	+
chr1	10697953	10706575	-
chr1	10808441	10819507	-
chr1	10817301	10819507	-
chr1	10921742	10936300	+
chr1	10924458	10930546	+
chr1	11156821	11161517	-
chr1	11257425	11292201	-
chr1	11260375	11275460	-
chr1	11262086	11271143	-
chr1	11267870	11292201	-
chr1	11280890	11292201	-
chr1	11290048	11292201	-
chr1	11314740	11319029	-
chr1	11849148	11915854	+
chr1	11849148	11917891	+
chr1	12029493	12122791	-
chr1	12042709	12044249	-
chr1	12132944	12133851	-
chr1	12234464	12234659	+
chr1	13620131	13621384	-
chr1	13622000	13628894	+
chr1	13627235	13628887	-
chr1	13627235	13639656	-
chr1	13630779	13632958	-
chr1	13668196	13709627	-
chr1	13687061	13687584	-
chr1	13690313	13697228	-
chr1	13690313	13709627	-
chr1	13691493	13694870	-
chr1	13745740	13747109	+
chr1	13829770	13834397	+
chr1	13846711	13894768	+
chr1	13877492	13886345	+
chr1	13877492	13894768	+
chr1	13891761	13894768	+
chr1	14083796	14085261	-
chr1	14083796	14086473	-
chr1	14083796	14086548	-
chr1	14083796	14096371	-
chr1	14083796	14107726	-
chr1	14083800	14085261	-
chr1	14083800	14086548	-
chr1	14089045	14103753	-
chr1	14089045	14108428	-
chr1	14092851	14103753	-
chr1	14094863	14103753	-
chr1	14094863	14112114	-
chr1	14096257	14103753	-
chr1	14096257	14118412	-
chr1	14099142	14103118	-
chr1	14099142	14103753	-
chr1	14099142	14107726	-
chr1	14099142	14110708	-
chr1	14099142	14116614	-
chr1	14101395	14103753	-
chr1	14114963	14125873	-
chr1	14407386	14407550	+
chr1	14407386	14416216	+
chr1	14407386	14428257	+
chr1	14407386	14436726	+
chr1	14415408	14430690	+
chr1	14415408	14442646	+
chr1	14430630	14442646	+
chr1	14436000	14442646	+
chr1	14436579	14442646	+
chr1	14446464	14447253	+
chr1	14699636	14752959	-
chr1	15699845	15707125	+
chr1	15907345	15948427	-
chr1	15907345	15948518	-
chr1	15907345	15956308	-
chr1	15949871	15955720	-
chr1	16020352	16026283	-
chr1	16040187	16040666	-
chr1	16047607	16068251	-
chr1	16054873	16065746	-
chr1	16056851	16057441	-
chr1	16080528	16089003	-
chr1	16119377	16127640	-
chr1	16160392	16165251	-
chr1	16327907	16348877	+
chr1	16333437	16334830	+
chr1	16338910	16340328	+
chr1	16348339	16357950	+
chr1	16348339	16369834	+
chr1	16356084	16357950	+
chr1	16360996	16361092	+
chr1	16367465	16370192	+
chr1	16375886	16381029	+
chr1	16375911	16381029	+
chr1	16379738	16381029	+
chr1	16385818	16390764	+
chr1	16393881	16395904	+
chr1	16393881	16400038	+
chr1	16395796	16409601	+
chr1	16396789	16400038	+
chr1	16396789	16402143	+
chr1	16415159	16421729	+
chr1	16415159	16446726	+
chr1	16415159	16463270	+
chr1	16415159	16473752	+
chr1	16415159	16480830	+
chr1	16415159	16481887	+
chr1	16415159	16494951	+
chr1	16421004	16421729	+
chr1	16433872	16438396	+
chr1	16438240	16480830	+
chr1	16463107	16473752	+
chr1	16472493	16473752	+
chr1	16472514	16507377	+
chr1	16487012	16494951	+
chr1	16492759	16494951	+
chr1	16492759	16496619	+
chr1	16603164	16603500	+
chr1	16603164	16604241	+
chr1	16779137	16871069	-
chr1	16870878	16889979	-
chr1	17075532	17075769	-
chr1	17075532	17091938	-
chr1	17075532	17134778	-
chr1	17224291	17225470	+
chr1	17224291	17233606	+
chr1	17224291	17233632	+
chr1	17236720	17240990	+
chr1	17236720	17243653	+
chr1	17240889	17248742	+
chr1	17240889	17261849	+
chr1	17240889	17262608	+
chr1	17243546	17248742	+
chr1	17319218	17319760	-
chr1	17336719	17336881	-
chr1	17651414	17652435	-
chr1	18341028	18356674	+
chr1	18440911	18442264	+
chr1	18440911	18451652	+
chr1	18440911	18455351	+
chr1	18440911	18457305	+
chr1	18440911	18462218	+
chr1	18451547	18457305	+
chr1	18451547	18462171	+
chr1	18451547	18462218	+
chr1	18451547	18463199	+
chr1	18496820	18497027	-
chr1	18574843	18633632	+
chr1	18574883	18575357	+
chr1	18581035	18587490	+
chr1	18608283	18629947	+
chr1	18628269	18633632	+
chr1	18633146	18633632	+
chr1	18659950	18665635	-
chr1	18675425	18683344	+
chr1	18675425	18720511	+
chr1	18675425	18725069	+
chr1	18675425	18734033	+
chr1	18679111	18720511	+
chr1	18679111	18725069	+
chr1	18698061	18701550	+
chr1	18698061	18702826	+
chr1	18701398	18702826	+
chr1	18715082	18717224	+
chr1	18724957	18734033	+
chr1	18853793	18878136	-
chr1	18858275	18860238	-
chr1	18877992	18885264	-
chr1	18877992	18930338	-
chr1	19381260	19405445	-
chr1	19487023	19530798	-
chr1	20039794	20041347	-
chr1	20314478	20315067	-
chr1	20564702	20583027	-
chr1	20604441	20605734	-
chr1	20630539	20657319	-
chr1	21161650	21174015	-
chr1	21161650	21193751	-
chr1	21200689	21222409	-
chr1	21215559	21249088	-
chr1	21222170	21230760	-
chr1	21231836	21249088	-
chr1	21865209	21879171	+
chr1	21865209	21887813	+
chr1	21874054	21887813	+
chr1	21874054	21916637	+
chr1	21880746	21916637	+
chr1	21885695	21916637	+
chr1	21887691	21897987	+
chr1	21887691	21930686	+
chr1	21896146	21897987	+
chr1	21908239	21909914	+
chr1	21908713	21933228	+
chr1	21932220	21933228	+
chr1	21935448	21937447	+
chr1	22008330	22010368	+
chr1	22008330	22014390	+
chr1	22008330	22015588	+
chr1	22008657	22009225	+
chr1	22017687	22018030	+
chr1	22041879	22042011	+
chr1	22086460	22126571	+
chr1	22086460	22134742	+
chr1	22126329	22134742	+
chr1	23010568	23016578	-
chr1	23012921	23016578	-
chr1	23026020	23034674	-
chr1	23026020	23051903	-
chr1	23027992	23051903	-
chr1	23034537	23051903	-
chr1	23034537	23062905	-
chr1	23090911	23097744	-
chr1	23159343	23167558	-
chr1	23159343	23176598	-
chr1	23161289	23166227	-
chr1	23161289	23184043	-
chr1	23166051	23167558	-
chr1	23183872	23189331	-
chr1	23205757	23263386	-
chr1	23213757	23233819	-
chr1	23213757	23252035	-
chr1	23232803	23239705	-
chr1	23236776	23243695	-
chr1	23262191	23266361	-
chr1	23262197	23266361	-
chr1	23262197	23270881	-
chr1	23268354	23270881	-
chr1	23287373	23287959	-
chr1	23646296	23664663	+
chr1	23847400	23871574	-
chr1	24139041	24139381	+
chr1	24139041	24141862	+
chr1	24162296	24168231	-
chr1	24164527	24168231	-
chr1	24166855	24168231	-
chr1	24723819	24792185	+
chr1	24724427	24792185	+
chr1	24730805	24792185	+
chr1	24730805	24802415	+
chr1	24787956	24792185	+
chr1	24792107	24857916	+
chr1	24792110	24802415	+
chr1	24792110	24857916	+
chr1	24813184	24815088	+
chr1	24849828	24857916	+
chr1	24857802	24857916	+
chr1	24857802	24860245	+
chr1	24896442	24896641	+
chr1	25298326	25303317	+
chr1	25357025	25360852	+
chr1	25380819	25396454	+
chr1	25396408	25404924	+
chr1	25510518	25575010	-
chr1	25510518	25589991	-
chr1	25518796	25540318	-
chr1	25518796	25589991	-
chr1	25529965	25540318	-
chr1	25536400	25537258	-
chr1	28014720	28016375	-
chr1	28380598	28417673	+
chr1	28423088	28425300	+
chr1	28423647	28424680	+
chr1	28424925	28425131	+
chr1	28438846	28531105	-
chr1	28449590	28531105	-
chr1	28449590	28541905	-
chr1	28454468	28531105	-
chr1	28454986	28524354	-
chr1	28454986	28531105	-
chr1	28460559	28531105	-
chr1	28507572	28524354	-
chr1	28524199	28531105	-
chr1	28530067	28531105	-
chr1	28658852	28664480	+
chr1	28660705	28664480	+
chr1	28662024	28664480	+
chr1	28662024	28675347	+
chr1	28675286	28688826	+
chr1	28693777	28695193	+
chr1	29231826	29233675	-
chr1	29827729	29828893	-
chr1	29833561	29837812	-
chr1	30408785	30410243	+
chr1	30684924	30727210	-
chr1	30684924	30732984	-
chr1	30714005	30766617	-
chr1	30727132	30767828	-
chr1	30747600	30804116	+
chr1	30747600	30810722	+
chr1	30766466	30767828	-
chr1	30841771	30883016	+
chr1	30861669	30866172	-
chr1	30861669	30867258	-
chr1	30877429	30883016	+
chr1	30921617	30928335	+
chr1	30921617	30942245	+
chr1	30934934	30942245	+
chr1	30979936	30990296	+
chr1	30986497	31001898	+
chr1	31007013	31009204	+
chr1	31384841	31390057	+
chr1	31384841	31394302	+
chr1	31384841	31412699	+
chr1	31387490	31394302	+
chr1	31387490	31412699	+
chr1	31387490	31428147	+
chr1	31389961	31394302	+
chr1	31389961	31412699	+
chr1	31389961	31428147	+
chr1	31412607	31421810	+
chr1	31419389	31428147	+
chr1	31493348	31502732	-
chr1	31493348	31506842	-
chr1	31500054	31502732	-
chr1	31625172	31625465	+
chr1	31706940	31707311	-
chr1	31710695	31711033	-
chr1	32054761	32072573	+
chr1	32054761	32104524	+
chr1	32080656	32107865	+
chr1	32080656	32169111	+
chr1	32091198	32093129	+
chr1	32111951	32169111	+
chr1	32124161	32169111	+
chr1	32128666	32143578	+
chr1	32129557	32169111	+
chr1	32473136	32519201	+
chr1	32473331	32474795	+
chr1	32509603	32519201	+
chr1	32509603	32533892	+
chr1	32524814	32533892	+
chr1	32529919	32533892	+
chr1	33407639	33415246	-
chr1	33765716	33766108	-
chr1	33773367	33825884	-
chr1	33806784	33827194	-
chr1	33806784	33831582	-
chr1	33806784	33841824	-
chr1	33806784	33891144	-
chr1	33818439	33823313	-
chr1	33818457	33841824	-
chr1	33825453	33827194	-
chr1	33927450	34002982	-
chr1	34000636	34002978	-
chr1	34002883	34051161	-
chr1	34002883	34051648	-
chr1	34002883	34068838	-
chr1	34454538	34470277	+
chr1	34740525	34756671	+
chr1	34740830	34742924	+
chr1	34824221	34826380	+
chr1	35154797	35171254	+
chr1	35154797	35194898	+
chr1	35246073	35263537	-
chr1	35263405	35269936	-
chr1	35269826	35281377	-
chr1	35479000	35479800	-
chr1	35479000	35482118	-
chr1	35479000	35499044	-
chr1	35488668	35489992	-
chr1	35488668	35500672	-
chr1	35796269	35796866	-
chr1	35916789	35919219	+
chr1	35916789	35974727	+
chr1	35982835	35982986	+
chr1	35990712	35991634	+
chr1	36026469	36027002	+
chr1	36687164	36694300	-
chr1	36705594	36708619	-
chr1	36705594	36710567	-
chr1	36705594	36712852	-
chr1	36705594	36720491	-
chr1	36715009	36718719	-
chr1	37113062	37126736	+
chr1	37134828	37137964	+
chr1	37134828	37143270	+
chr1	37134828	37147403	+
chr1	37339106	37353844	+
chr1	37436955	37437324	-
chr1	37481530	37483065	-
chr1	37497059	37503843	-
chr1	37509688	37516397	-
chr1	37547312	37552617	+
chr1	37716621	37716938	+
chr1	38406089	38406224	+
chr1	38479515	38479787	+
chr1	38556809	38611471	+
chr1	38708635	38795389	+
chr1	38719884	38795389	+
chr1	38722165	38722291	+
chr1	38795228	38804840	+
chr1	38808883	38824238	+
chr1	38824102	38826411	+
chr1	39602176	39627811	-
chr1	40724639	40760525	-
chr1	40737382	40745673	-
chr1	40737382	40747135	-
chr1	40737382	40750006	-
chr1	40737382	40751473	-
chr1	40737382	40764451	-
chr1	40737382	40767556	-
chr1	40745354	40767556	-
chr1	40749925	40767556	-
chr1	40758731	40767556	-
chr1	40759886	40760355	-
chr1	40759886	40767556	-
chr1	40782838	40789439	-
chr1	40861688	40952696	-
chr1	40891901	40894289	-
chr1	40891901	40936935	-
chr1	40891901	40952696	-
chr1	40936825	40956871	-
chr1	41020547	41035989	+
chr1	41398639	41399249	+
chr1	41407702	41407862	+
chr1	41672927	41673155	-
chr1	41713229	41713431	-
chr1	42663062	42734257	+
chr1	43484628	43504220	+
chr1	43484628	43518628	+
chr1	43484628	43522155	+
chr1	43491996	43492593	+
chr1	43504160	43584779	+
chr1	43518574	43584779	-
chr1	43518574	43584779	+
chr1	43531214	43531397	+
chr1	43531214	43584779	+
chr1	43566144	43584779	+
chr1	43566144	43584779	-
chr1	43566144	43644080	+
chr1	43583859	43669021	+
chr1	43637117	43669021	+
chr1	43637117	43687836	+
chr1	43637117	43704447	+
chr1	43637117	43723126	+
chr1	43644053	43658742	+
chr1	43654113	43658887	+
chr1	43654113	43669021	+
chr1	43654113	43669021	-
chr1	43654855	43658887	+
chr1	43658709	43687836	+
chr1	43658709	43710923	+
chr1	43658709	43723126	+
chr1	43660998	43723126	+
chr1	43668973	43704447	+
chr1	43668973	43723126	+
chr1	43668973	43746142	+
chr1	43704396	43710923	+
chr1	43704396	43723126	+
chr1	43740715	43740847	+
chr1	43745383	43763633	+
chr1	43745383	43766415	+
chr1	43753497	43766415	+
chr1	43756748	43762852	+
chr1	43759327	43766415	+
chr1	43759327	43789696	+
chr1	43792816	43794063	+
chr1	43793005	43793268	+
chr1	43793713	43794430	+
chr1	43793910	43794132	+
chr1	44437422	44519859	+
chr1	44439810	44443134	+
chr1	44452555	44473200	-
chr1	44454220	44469456	-
chr1	44457511	44469456	-
chr1	44462993	44469456	-
chr1	44466345	44473465	-
chr1	44467550	44473465	-
chr1	44537105	44540267	+
chr1	44686540	44733410	-
chr1	44733281	44736799	-
chr1	45632971	45640532	+
chr1	45632971	45682546	+
chr1	45652264	45677973	+
chr1	45692533	45737883	+
chr1	45701229	45706203	+
chr1	45701229	45721056	+
chr1	45701229	45737883	+
chr1	45701229	45764360	+
chr1	45720967	45764360	+
chr1	45734304	45764360	+
chr1	45734304	45805070	+
chr1	45737786	45764360	+
chr1	45737786	45787500	+
chr1	45756710	45764360	+
chr1	45756710	45805070	+
chr1	45775470	45787500	+
chr1	45778464	45805070	+
chr1	47936666	47952313	+
chr1	47936666	47955934	+
chr1	47962692	47963874	+
chr1	48636667	48636829	+
chr1	48636667	48671226	+
chr1	48636667	48710378	+
chr1	48670438	48671226	+
chr1	48670438	48710378	+
chr1	48670438	48736020	+
chr1	48670438	48763509	+
chr1	48677670	48679407	-
chr1	48710256	48736020	+
chr1	48754988	48758440	+
chr1	48754988	48763509	+
chr1	48755862	48782867	+
chr1	48758312	48762937	+
chr1	48774951	48775049	+
chr1	49106604	49188719	-
chr1	49498576	49500948	-
chr1	49510302	49517462	-
chr1	49615190	49624011	+
chr1	49650664	49657101	-
chr1	49652177	49654308	-
chr1	49652177	49654956	-
chr1	49654160	49656014	-
chr1	49655860	49668456	-
chr1	49655860	49672750	-
chr1	49661797	49661946	-
chr1	49668383	49672750	-
chr1	49668383	49674605	-
chr1	49671349	49695061	-
chr1	49672698	49695061	-
chr1	49748315	49759398	-
chr1	49749150	49759398	-
chr1	49806605	49823047	+
chr1	49807726	49823047	+
chr1	49844429	49853702	+
chr1	50188006	50189854	-
chr1	50188006	50191728	-
chr1	50194522	50208429	-
chr1	50201601	50208429	-
chr1	50231074	50234976	+
chr1	50341389	50346337	+
chr1	50514829	50516588	+
chr1	50514829	50517149	+
chr1	50514829	50518742	+
chr1	50514832	50516588	+
chr1	50514832	50517149	+
chr1	50514832	50518742	+
chr1	50514874	50517149	+
chr1	50516495	50517149	+
chr1	50692802	50727843	-
chr1	50704476	50709332	-
chr1	54896429	54968713	-
chr1	56080745	56109914	-
chr1	56093262	56106529	-
chr1	56096586	56109914	-
chr1	56229525	56230776	+
chr1	56259722	56296845	+
chr1	56870736	56892084	+
chr1	56929188	56936748	+
chr1	57087630	57185163	+
chr1	57105761	57176713	+
chr1	57105761	57195641	+
chr1	57195565	57275978	+
chr1	57668281	57670135	+
chr1	57669288	57669485	+
chr1	57736113	57736496	-
chr1	57754131	57759377	-
chr1	58460994	58517592	+
chr1	58468248	58490977	+
chr1	58468248	58517592	+
chr1	58472237	58517592	+
chr1	58484448	58490977	+
chr1	58484448	58517592	+
chr1	58573222	58615523	-
chr1	58637710	58651392	-
chr1	58758938	58759310	-
chr1	58779714	58805318	+
chr1	58785481	58805193	+
chr1	58785481	58805318	+
chr1	58882375	58891662	+
chr1	59051723	59101967	+
chr1	59090958	59092581	+
chr1	59090958	59101967	+
chr1	59101876	59138159	+
chr1	59101876	59169921	+
chr1	59101876	59201446	+
chr1	59138032	59169921	+
chr1	59247776	59249277	+
chr1	59596553	59621270	+
chr1	59683375	59733226	-
chr1	59692028	59733226	-
chr1	59698189	59718542	-
chr1	59707495	59713073	-
chr1	59707495	59715138	-
chr1	59726630	59733226	-
chr1	59726630	59744379	-
chr1	59728050	59728333	-
chr1	59728050	59744379	-
chr1	59732284	59733226	-
chr1	59739761	59744379	-
chr1	59739761	59752746	-
chr1	59739761	59755752	-
chr1	59744263	59752746	-
chr1	59750077	59752746	-
chr1	59750077	59755752	-
chr1	60436311	60443757	-
chr1	60892774	60900407	-
chr1	60892774	60924967	-
chr1	60892774	60959765	-
chr1	60893529	60924967	-
chr1	60893529	60941431	-
chr1	60896459	60897286	-
chr1	60896459	60905657	-
chr1	60896459	60919037	-
chr1	60900122	60905657	-
chr1	60900122	60932819	-
chr1	60908343	60951054	-
chr1	60917775	60925224	-
chr1	60917933	60932819	-
chr1	60917933	60959765	-
chr1	60924834	60932819	-
chr1	60924834	60959765	-
chr1	60931626	60945988	-
chr1	60931626	60953192	-
chr1	60931626	60959765	-
chr1	60932166	60938985	-
chr1	60941274	60945988	-
chr1	60945903	60953192	-
chr1	60945903	60958860	-
chr1	60958626	60959765	-
chr1	61006638	61007238	-
chr1	61006638	61009838	-
chr1	61006638	61011614	-
chr1	61009632	61011614	-
chr1	62359383	62362228	+
chr1	62359383	62363760	+
chr1	62359383	62363765	+
chr1	62382628	62387228	+
chr1	62472028	62472231	+
chr1	62483942	62487269	+
chr1	62517227	62536805	+
chr1	62575663	62581773	+
chr1	62575663	62585276	+
chr1	62601980	62621757	+
chr1	62618836	62632427	+
chr1	62627527	62628509	+
chr1	62630180	62632427	+
chr1	62685634	62693450	+
chr1	62688791	62693450	+
chr1	62694949	62699277	+
chr1	62694949	62728124	+
chr1	62710641	62728124	+
chr1	62791098	62795885	-
chr1	62793095	62795885	-
chr1	63043183	63129976	+
chr1	63612661	63620424	-
chr1	63620357	63621075	-
chr1	63683312	63729178	-
chr1	63702369	63729178	-
chr1	63702369	63739758	-
chr1	63721690	63742985	-
chr1	63729106	63748701	-
chr1	63741388	63748701	-
chr1	63802702	63803519	+
chr1	63827195	63872257	-
chr1	63933083	63933900	-
chr1	63963202	63991293	+
chr1	63968198	63969338	+
chr1	63969189	63975086	+
chr1	63969189	63989890	+
chr1	64125098	64134683	-
chr1	64127212	64142836	-
chr1	64154743	64171637	-
chr1	64154743	64242791	-
chr1	64154743	64254717	-
chr1	64162830	64173097	-
chr1	64163449	64171637	-
chr1	64530709	64532147	+
chr1	64537913	64581863	+
chr1	64551537	64553031	-
chr1	64636511	64638406	-
chr1	64644354	64649966	-
chr1	64653758	64656155	-
chr1	64664010	64665100	-
chr1	64669978	64670826	-
chr1	64669978	64706741	-
chr1	64709143	64735305	-
chr1	64711528	64718073	-
chr1	64724998	64725754	-
chr1	64730429	64735305	-
chr1	64731984	64735305	-
chr1	64737842	64740083	-
chr1	64739889	64744001	-
chr1	64739889	64750734	-
chr1	64791796	64796316	+
chr1	65031475	65066611	-
chr1	65066462	65138981	-
chr1	65186583	65186696	-
chr1	65186583	65190018	-
chr1	65510541	65516242	-
chr1	65514424	65518411	-
chr1	71033864	71055642	+
chr1	71041496	71055642	+
chr1	71041857	71055642	+
chr1	71050733	71055642	+
chr1	71743845	71755541	-
chr1	72012305	72015264	+
chr1	72029647	72055341	+
chr1	72066426	72067515	+
chr1	72117759	72118376	+
chr1	72651151	72656373	+
chr1	72729565	72753706	-
chr1	72746155	72746367	-
chr1	72811960	72840853	-
chr1	74429976	74470252	-
chr1	74443451	74451249	-
chr1	74443451	74460814	-
chr1	74443451	74470252	-
chr1	74451004	74460814	-
chr1	75046187	75048394	-
chr1	75077812	75089458	-
chr1	75077812	75101925	-
chr1	75082708	75101925	-
chr1	75089370	75122293	-
chr1	75096799	75101925	-
chr1	75096803	75101925	-
chr1	75096803	75122290	-
chr1	75120565	75126511	-
chr1	75153935	75169306	-
chr1	75164523	75169306	-
chr1	75168131	75169306	-
chr1	76199585	76205846	-
chr1	76204200	76205880	-
chr1	76213542	76215451	-
chr1	76360591	76387864	-
chr1	76386076	76387864	-
chr1	76386076	76393806	-
chr1	77113375	77117222	+
chr1	77113375	77164321	+
chr1	77521348	77554375	+
chr1	80241843	80293999	-
chr1	80241843	80313405	-
chr1	80283904	80293999	-
chr1	80301609	80327183	-
chr1	80305181	80320920	-
chr1	80305181	80328942	-
chr1	80320769	80328942	-
chr1	80327076	80328942	-
chr1	80327076	80347867	-
chr1	80332935	80347867	-
chr1	80332935	80356402	-
chr1	80332935	80366530	-
chr1	80337080	80347867	-
chr1	80356326	80365853	-
chr1	80356326	80366530	-
chr1	80660554	80671102	-
chr1	80660554	80674076	-
chr1	80661946	80671102	-
chr1	80661946	80674076	-
chr1	80669933	80671102	-
chr1	80669933	80674076	-
chr1	80669933	80677096	-
chr1	80670914	80674076	-
chr1	80703288	80705328	-
chr1	80704897	80705153	-
chr1	80817246	80817436	-
chr1	80866820	80877325	-
chr1	82008873	82014706	+
chr1	82029757	82034903	+
chr1	82062491	82105874	-
chr1	82091326	82105874	-
chr1	82103870	82105874	-
chr1	82119012	82120725	+
chr1	82119012	82124988	+
chr1	82119012	82131866	+
chr1	82129481	82129859	+
chr1	82801007	82803766	+
chr1	82801007	82831362	+
chr1	82828506	82828806	+
chr1	83281459	83314537	-
chr1	83291218	83296789	-
chr1	83293023	83299261	-
chr1	83296866	83298825	-
chr1	83299113	83301016	-
chr1	83299113	83306149	-
chr1	83299113	83314537	-
chr1	83300055	83301016	-
chr1	83300055	83323066	-
chr1	83300923	83303472	-
chr1	83314424	83323066	-
chr1	83316652	83323066	-
chr1	83671901	83687887	+
chr1	83671901	83700348	+
chr1	83671901	83761773	+
chr1	83687835	83761773	+
chr1	83761690	83803523	+
chr1	83761690	83837766	+
chr1	83783012	83803523	+
chr1	84047499	84048935	+
chr1	84265701	84266539	+
chr1	84291927	84371187	-
chr1	84362745	84369923	-
chr1	84364417	84371187	-
chr1	84366709	84371187	-
chr1	84368781	84369885	-
chr1	84436388	84447507	-
chr1	84455611	84456428	-
chr1	84504091	84548822	+
chr1	84560340	84609236	+
chr1	84661123	84707661	+
chr1	84695204	84698161	+
chr1	84707533	84709465	+
chr1	84718714	84732574	-
chr1	84719931	84721636	-
chr1	84720228	84721705	-
chr1	84723987	84732574	-
chr1	85505385	85515279	-
chr1	85505385	85523221	-
chr1	85692376	85694000	+
chr1	85695288	85703152	+
chr1	85703036	85709751	+
chr1	85791533	85793122	-
chr1	85904994	85909243	-
chr1	86114516	86185934	+
chr1	86117058	86133686	+
chr1	86210889	86215967	+
chr1	86215835	86230282	+
chr1	86322009	86326869	-
chr1	86322009	86338016	-
chr1	86322009	86342031	-
chr1	86325612	86338016	-
chr1	86333460	86342031	-
chr1	86404397	86406713	-
chr1	86577008	86578737	+
chr1	86577008	86580240	+
chr1	86577008	86583712	+
chr1	86577008	86593353	+
chr1	86583593	86607773	+
chr1	86605589	86612583	+
chr1	86605589	86631512	+
chr1	86675087	86675304	-
chr1	86683064	86685128	-
chr1	86721100	86729645	-
chr1	86729501	86748854	-
chr1	86836070	86861989	-
chr1	86842876	86857143	-
chr1	86854995	86857143	-
chr1	86854995	86860050	-
chr1	86854995	86861989	-
chr1	86871593	86954593	-
chr1	86878850	86950190	-
chr1	86878850	86954593	-
chr1	86885064	86950190	-
chr1	86889726	86954593	-
chr1	86895079	86954593	-
chr1	86934153	86954593	-
chr1	87018881	87058229	-
chr1	87051980	87058229	-
chr1	87051980	87071625	-
chr1	87749485	87752243	-
chr1	87753750	87818404	-
chr1	87778132	87818404	-
chr1	87780293	87787404	-
chr1	87798320	87803021	-
chr1	87802827	87818404	-
chr1	87808693	87818404	-
chr1	87818252	87822853	-
chr1	87947747	87952353	+
chr1	87974402	87980116	-
chr1	89808236	89811756	-
chr1	89855162	89856310	+
chr1	89930247	89935970	-
chr1	89934334	89940816	-
chr1	89934334	89947529	-
chr1	89935482	89940816	-
chr1	89940533	89940816	-
chr1	89943823	89951181	-
chr1	89946849	89947529	-
chr1	89946849	89951181	-
chr1	89949853	89951181	-
chr1	90139787	90197854	-
chr1	90190085	90191167	-
chr1	91970429	91988926	+
chr1	92023376	92024059	-
chr1	92286460	92286929	-
chr1	92308000	92328441	-
chr1	92363429	92364169	+
chr1	92392756	92400835	+
chr1	92839217	92845471	+
chr1	93078496	93084768	+
chr1	93126379	93129513	+
chr1	93126379	93142829	+
chr1	93276973	93278294	-
chr1	93278136	93283974	-
chr1	93283914	93284920	-
chr1	93363328	93365318	-
chr1	93367163	93381747	-
chr1	93372923	93380925	-
chr1	93380691	93415072	-
chr1	93396708	93415072	-
chr1	93410710	93415072	-
chr1	93506710	93566176	-
chr1	93560103	93566176	-
chr1	93732496	93732898	-
chr1	94522914	94542426	+
chr1	94529064	94530415	+
chr1	94529064	94577735	+
chr1	94535553	94542426	+
chr1	94535553	94546236	+
chr1	94535683	94542336	+
chr1	94537417	94539975	+
chr1	94537417	94546236	+
chr1	94539851	94546236	+
chr1	94542248	94546236	+
chr1	94542248	94556674	+
chr1	94542248	94570658	+
chr1	94547632	94549152	+
chr1	94556572	94562622	+
chr1	94556572	94572993	+
chr1	94556572	94577735	+
chr1	94559521	94575209	+
chr1	94568796	94577735	+
chr1	94575045	94577735	+
chr1	94575045	94595460	+
chr1	94575092	94595460	+
chr1	94595325	94595460	+
chr1	96437296	96526968	+
chr1	96603029	96635741	-
chr1	96603029	96663976	-
chr1	96661538	96704876	-
chr1	96702125	96704876	-
chr1	96785769	96802706	-
chr1	96790778	96802706	-
chr1	96792818	96806044	-
chr1	96802616	96806044	-
chr1	96822716	96825501	-
chr1	96888390	96896484	+
chr1	97325989	97332007	+
chr1	97325989	97378276	+
chr1	97325992	97378276	+
chr1	97708231	97713399	-
chr1	97745503	97811342	+
chr1	97905978	97924771	+
chr1	97924610	97952202	+
chr1	97951480	97952202	+
chr1	97983037	97985752	+
chr1	97983037	97988350	+
chr1	97989981	97993796	+
chr1	97990792	97991130	+
chr1	97996194	97996442	+
chr1	98110331	98135954	+
chr1	100997725	101033107	-
chr1	101000628	101003691	-
chr1	101003397	101003691	-
chr1	101040899	101052569	-
chr1	101178704	101180415	-
chr1	101178704	101190143	-
chr1	101178704	101199679	-
chr1	101178704	101203107	-
chr1	101205441	101210132	-
chr1	101205441	101216594	-
chr1	101205441	101227302	-
chr1	101209893	101216504	-
chr1	101227153	101288112	-
chr1	101482545	101554111	-
chr1	101482923	101554111	-
chr1	101579254	101586356	+
chr1	101627932	101630402	+
chr1	101627932	101634870	+
chr1	101650557	101690582	+
chr1	101693271	101694439	+
chr1	101694246	101695956	+
chr1	101694246	101706552	+
chr1	101703174	101712509	+
chr1	101704035	101706552	+
chr1	101704035	101710750	+
chr1	101705723	101713584	+
chr1	101705723	101718964	+
chr1	101706422	101710750	+
chr1	101708892	101723264	+
chr1	101712471	101717843	+
chr1	101722144	101726824	+
chr1	101733941	101746676	-
chr1	101744026	101761598	-
chr1	101760961	101761598	-
chr1	101848831	101856904	+
chr1	103173036	103183452	-
chr1	103173036	103189241	-
chr1	103173036	103215801	-
chr1	103176718	103215268	-
chr1	103177828	103182355	-
chr1	103188265	103209709	-
chr1	103189166	103209709	-
chr1	103206285	103215801	-
chr1	103248558	103261556	-
chr1	103254747	103261556	-
chr1	103254747	103290666	-
chr1	103352119	103365781	+
chr1	103475506	103476989	+
chr1	103475506	103477380	+
chr1	103475531	103476367	+
chr1	103475553	103475685	+
chr1	103476354	103477777	+
chr1	103476384	103476698	+
chr1	103476561	103476712	+
chr1	103476885	103477621	+
chr1	103504054	103509525	-
chr1	103504054	103513105	-
chr1	103504054	103515440	-
chr1	103504054	103517938	-
chr1	103510423	103515440	-
chr1	103512706	103513105	-
chr1	103512706	103520361	-
chr1	103515150	103520361	-
chr1	103542031	103553116	+
chr1	103929814	103946660	-
chr1	103941335	103946660	-
chr1	103946009	103946660	-
chr1	104225268	104227521	-
chr1	105560396	105562500	-
chr1	105716717	105726014	-
chr1	105725847	105730265	-
chr1	105756427	105757474	-
chr1	105756427	105787819	-
chr1	105780856	105785261	-
chr1	105816268	105820578	-
chr1	105816268	105822032	-
chr1	105816268	105825247	-
chr1	105816268	105870732	-
chr1	105833833	105842695	-
chr1	105833833	105854597	-
chr1	105833833	105870732	-
chr1	105923806	105926380	-
chr1	105923806	105930130	-
chr1	105927963	105930130	-
chr1	105944305	105950799	+
chr1	105950019	105950799	+
chr1	105950079	105955716	+
chr1	105950079	105955729	+
chr1	105950079	105955780	+
chr1	105950095	105950408	+
chr1	105951341	105951833	+
chr1	105954319	105955716	+
chr1	106025646	106026431	+
chr1	106025646	106060307	+
chr1	106033404	106060307	+
chr1	106060180	106070099	+
chr1	106866485	106906722	-
chr1	106924969	106929326	-
chr1	106924969	106964621	-
chr1	106924969	106964816	-
chr1	107730134	107732079	+
chr1	107795203	107808698	+
chr1	107800904	107835060	+
chr1	107807533	107835060	+
chr1	107807533	107885700	+
chr1	107808626	107835060	+
chr1	107826614	107835060	+
chr1	107826614	107885700	+
chr1	107885623	107985266	+
chr1	108027065	108027292	+
chr1	108283320	108300266	-
chr1	108373012	108376650	-
chr1	108480411	108482233	+
chr1	108509328	108581209	-
chr1	108567674	108570398	+
chr1	108567674	108607783	+
chr1	109565535	109570791	-
chr1	109670823	109677495	+
chr1	109687871	109688905	+
chr1	110363115	110393162	+
chr1	110456935	110466259	+
chr1	110525007	110526648	+
chr1	110525007	110527398	+
chr1	110525007	110532832	+
chr1	110525007	110538400	+
chr1	110525007	110548336	+
chr1	110525007	110561827	+
chr1	110525007	110561873	+
chr1	110526473	110532832	+
chr1	110526473	110548336	+
chr1	110527368	110538400	+
chr1	110532619	110538400	+
chr1	110532619	110548336	+
chr1	110532619	110561873	+
chr1	110536582	110548336	+
chr1	110560014	110561873	+
chr1	110568020	110568492	+
chr1	110714913	110716311	+
chr1	113945017	113959372	-
chr1	113952118	113959372	-
chr1	113957631	113959372	-
chr1	113957631	114049837	-
chr1	114030307	114049837	-
chr1	114031438	114049837	-
chr1	114106973	114121891	+
chr1	114109374	114116975	+
chr1	114109374	114121891	+
chr1	114115365	114116975	+
chr1	114173835	114184187	+
chr1	115131874	115133416	-
chr1	115163044	115173093	-
chr1	115244033	115244724	-
chr1	115244033	115295202	-
chr1	116168702	116168946	+
chr1	116730738	116747484	-
chr1	116733952	116747484	-
chr1	116733952	116748998	-
chr1	116736712	116747484	-
chr1	116736712	116748998	-
chr1	116747310	116748998	-
chr1	116818564	116842031	+
chr1	116834275	116842031	+
chr1	116864407	116900708	+
chr1	116898187	116900708	+
chr1	116898197	116898897	+
chr1	116900619	116917868	+
chr1	117474207	117481216	-
chr1	117494796	117498416	+
chr1	117496937	117498416	+
chr1	117503664	117504551	+
chr1	117504415	117505576	+
chr1	117504415	117508579	+
chr1	117505462	117508579	+
chr1	117679964	117689652	+
chr1	117679964	117695600	+
chr1	117915888	117919469	-
chr1	117916831	117919469	-
chr1	117916831	117921917	-
chr1	118210154	118210285	-
chr1	118245773	118245999	-
chr1	118360629	118378712	-
chr1	118377838	118378712	-
chr1	118407119	118407846	-
chr1	118422478	118445673	-
chr1	118441846	118445673	-
chr1	118441846	118445717	-
chr1	118453312	118519307	-
chr1	118456304	118519307	-
chr1	118608830	118609231	-
chr1	118750717	118761148	+
chr1	118797749	118798162	+
chr1	118820959	118822199	+
chr1	118835828	118837146	+
chr1	118997320	118997601	-
chr1	119005311	119005809	-
chr1	119007907	119010795	-
chr1	119023252	119023804	+
chr1	119232932	119240030	+
chr1	119232932	119256508	+
chr1	119514761	119517887	+
chr1	119524203	119530888	+
chr1	119541594	119542601	+
chr1	119589317	119598313	+
chr1	119639316	119643524	-
chr1	120006408	120018432	-
chr1	120201400	120226027	-
chr1	120217112	120217302	-
chr1	120217112	120226027	-
chr1	120217112	120238830	-
chr1	120217128	120219352	-
chr1	120217128	120222619	-
chr1	120217128	120238830	-
chr1	120217151	120220909	-
chr1	120217151	120221769	-
chr1	120217151	120238879	-
chr1	120217204	120225942	-
chr1	120217226	120226027	-
chr1	120219313	120221794	-
chr1	120219580	120220839	-
chr1	120220839	120221244	-
chr1	120220839	120221260	-
chr1	120220839	120221794	-
chr1	120220839	120226027	-
chr1	120222240	120223860	-
chr1	120222575	120226027	-
chr1	120222575	120238879	-
chr1	120222606	120238867	-
chr1	120223752	120223858	-
chr1	120238753	120239994	-
chr1	120451817	120452881	-
chr1	120451817	120481968	-
chr1	120451817	120489178	-
chr1	120451817	120492427	-
chr1	120465231	120476695	-
chr1	120465231	120481968	-
chr1	120492325	120506659	-
chr1	120495463	120496890	-
chr1	120497033	120517295	-
chr1	120511954	120517295	-
chr1	120514453	120517295	-
chr1	120524927	120565363	-
chr1	120540063	120542505	-
chr1	120553577	120585474	-
chr1	120607343	120625949	-
chr1	120607343	120698398	-
chr1	120624103	120625949	-
chr1	120624103	120633342	-
chr1	120624103	120698398	-
chr1	120627959	120630732	-
chr1	120629177	120633342	-
chr1	120630634	120698912	-
chr1	120698325	120698912	-
chr1	120698325	120746163	-
chr1	120819964	120822690	+
chr1	120822581	120830440	+
chr1	121374838	121402635	+
chr1	121395335	121402635	+
chr1	121406311	121424181	+
chr1	121412882	121413668	+
chr1	121419348	121420709	+
chr1	121424063	121444364	+
chr1	121427299	121429131	+
chr1	121461056	121474102	+
chr1	121462434	121467570	+
chr1	121462434	121470382	+
chr1	121462434	121472289	+
chr1	121472041	121474102	+
chr1	121497590	121499163	+
chr1	121501970	121511444	+
chr1	121501970	121514368	+
chr1	122401601	122401698	+
chr1	122418312	122420661	+
chr1	122429736	122430561	+
chr1	122502954	122505952	+
chr1	122555320	122590226	+
chr1	122575842	122575952	+
chr1	122580189	122590226	+
chr1	122583256	122590226	+
chr1	122589603	122590226	+
chr1	123053052	123054608	+
chr1	123053052	123057933	+
chr1	123277832	123316294	+
chr1	123398064	123401996	+
chr1	123414110	123414335	+
chr1	124272731	124279321	+
chr1	124278273	124279285	+
chr1	124293229	124309028	+
chr1	124307574	124309028	+
chr1	124600344	124601656	-
chr1	124772985	124785165	+
chr1	124781952	124806011	+
chr1	124801757	124806011	+
chr1	124801757	124811336	+
chr1	124801757	124816635	+
chr1	124814760	124822717	+
chr1	124814760	124827295	+
chr1	124814760	124829936	+
chr1	124814760	124835782	+
chr1	124822520	124843460	+
chr1	124856765	124862227	+
chr1	124861733	124884580	+
chr1	124875217	124884580	+
chr1	124875217	124895832	+
chr1	124880331	124884580	+
chr1	124924404	124928296	-
chr1	124967958	124975016	-
chr1	124982099	124982358	-
chr1	124982099	124986652	-
chr1	124982099	124992019	-
chr1	124986332	124988911	-
chr1	124986332	124992019	-
chr1	124988716	125013992	-
chr1	124997044	125013992	-
chr1	125013096	125013992	-
chr1	125013096	125040144	-
chr1	125143607	125147925	+
chr1	125143607	125162014	+
chr1	125146815	125147925	+
chr1	125156434	125156993	+
chr1	125158388	125158803	+
chr1	125216285	125219611	-
chr1	125219031	125219611	-
chr1	125219031	125223164	-
chr1	125244334	125244643	-
chr1	125245788	125294523	-
chr1	125298218	125319526	+
chr1	125313217	125319526	+
chr1	125353257	125353624	+
chr1	125533715	125533850	-
chr1	125535574	125535681	-
chr1	126135903	126170787	-
chr1	126147152	126149673	-
chr1	126147152	126159341	-
chr1	126865306	126928380	-
chr1	126926295	126928380	-
chr1	126926295	126936954	-
chr1	126926295	126950090	-
chr1	126936875	126950090	-
chr1	126947680	126950090	-
chr1	127028874	127029399	-
chr1	127112256	127113254	-
chr1	127113151	127147715	-
chr1	127231240	127231531	-
chr1	127252419	127252852	-
chr1	127604960	127637341	+
chr1	127622339	127637341	+
chr1	127622339	127641705	+
chr1	127622339	127695635	+
chr1	127627760	127641705	+
chr1	127637223	127676835	+
chr1	127641288	127641705	+
chr1	127641288	127695635	+
chr1	127648622	127652412	+
chr1	127648622	127695635	+
chr1	127652254	127653574	+
chr1	127663948	127695880	+
chr1	127687130	127688829	+
chr1	127715923	127722747	+
chr1	127715923	127724860	+
chr1	127715923	127725909	+
chr1	127972024	128023881	-
chr1	127972024	128030115	-
chr1	127993667	128023881	-
chr1	127997792	128023881	-
chr1	127997792	128030113	-
chr1	127997792	128030115	-
chr1	127997792	128031634	-
chr1	127997792	128040020	-
chr1	128019977	128023881	-
chr1	128019977	128030115	-
chr1	128019977	128040020	-
chr1	128019977	128046977	-
chr1	128029256	128040331	-
chr1	128283578	128283830	+
chr1	128429706	128438922	-
chr1	128560863	128566128	+
chr1	128561720	128563716	+
chr1	128658253	128690221	+
chr1	128658253	128695939	+
chr1	128682225	128690221	+
chr1	128682225	128695939	+
chr1	128694117	128742827	+
chr1	129010278	129021068	+
chr1	129020787	129028855	+
chr1	129020946	129028855	+
chr1	129170103	129170576	+
chr1	132148097	132152573	+
chr1	132148097	132158849	+
chr1	132148097	132159987	+
chr1	132148097	132160234	+
chr1	132155313	132160234	+
chr1	132182475	132254606	+
chr1	132216523	132221585	+
chr1	132216530	132221585	+
chr1	132315006	132319791	+
chr1	132315006	132321809	+
chr1	132315006	132367489	+
chr1	132344009	132347527	+
chr1	132344009	132356808	+
chr1	132344009	132367489	+
chr1	132344009	132380462	+
chr1	132441606	132453607	+
chr1	132444598	132453607	+
chr1	132793926	132819247	-
chr1	132817549	132830751	-
chr1	132819045	132825754	-
chr1	132825228	132825754	-
chr1	132825589	132830751	-
chr1	132828552	132830751	-
chr1	132829558	132830751	-
chr1	132905797	132909067	+
chr1	132905797	132925720	+
chr1	132908962	132918509	+
chr1	132954611	132955247	-
chr1	132955868	132974980	-
chr1	132962461	132969266	-
chr1	132962461	132974980	-
chr1	132965229	132967155	-
chr1	132965229	132974980	-
chr1	132967047	132969266	-
chr1	132973440	133000011	-
chr1	132990170	133000011	-
chr1	132995833	133000011	-
chr1	133265650	133266633	+
chr1	133338955	133348678	+
chr1	133342937	133348678	+
chr1	133418893	133435248	+
chr1	133480685	133512016	-
chr1	133499718	133512016	-
chr1	134284840	134300133	-
chr1	134286636	134303284	-
chr1	134290614	134300133	-
chr1	134320525	134331638	-
chr1	134324226	134331638	-
chr1	134326363	134331638	-
chr1	134333482	134333981	-
chr1	134518066	134536714	+
chr1	134518070	134536714	+
chr1	134518964	134526927	+
chr1	134520213	134526927	+
chr1	134599617	134607972	+
chr1	134599617	134615687	+
chr1	134599617	134619308	+
chr1	134599617	134620436	+
chr1	134599617	134635761	+
chr1	134599617	134636559	+
chr1	134599617	134657483	+
chr1	134603848	134607972	+
chr1	134607758	134615687	+
chr1	134611515	134618061	+
chr1	134611515	134619308	+
chr1	134611515	134621568	+
chr1	134611515	134636559	+
chr1	134612797	134615687	+
chr1	134612797	134618061	+
chr1	134612797	134621568	+
chr1	134628971	134632408	+
chr1	134628971	134643130	+
chr1	134628971	134651252	+
chr1	134628971	134653435	+
chr1	134632354	134636559	+
chr1	134632354	134654676	+
chr1	134632354	134655932	+
chr1	134632354	134657483	+
chr1	134632354	134661090	+
chr1	134632354	134679346	+
chr1	134635207	134651252	+
chr1	134640968	134659892	+
chr1	134640968	134670263	+
chr1	134653308	134654676	+
chr1	134653308	134655932	+
chr1	134655799	134659892	+
chr1	134655799	134667697	+
chr1	134655799	134679346	+
chr1	134656767	134667697	+
chr1	134656767	134670263	+
chr1	134656767	134675125	+
chr1	134656767	134677703	+
chr1	134656767	134679346	+
chr1	134659824	134670263	+
chr1	134659824	134675125	+
chr1	134659831	134670263	+
chr1	134677507	134682893	+
chr1	134678892	134682893	+
chr1	134746449	134800523	-
chr1	134756873	134758013	-
chr1	134757800	134762980	-
chr1	134770023	134774718	-
chr1	134774497	134774718	-
chr1	134774497	134782945	-
chr1	134774497	134790152	-
chr1	134774497	134800523	-
chr1	134775183	134790152	-
chr1	134775183	134797103	-
chr1	134778128	134790152	-
chr1	134778128	134797103	-
chr1	134782800	134787969	-
chr1	134782800	134790152	-
chr1	134787836	134790109	-
chr1	134787850	134797072	-
chr1	134790066	134797103	-
chr1	135371125	135377427	+
chr1	135427947	135460226	+
chr1	135757992	135792442	-
chr1	135799453	135808985	-
chr1	135829825	135910108	+
chr1	136203227	136221620	-
chr1	136203227	136275220	-
chr1	136271278	136275220	-
chr1	136271278	136291811	-
chr1	136384654	136393043	+
chr1	136391765	136393043	+
chr1	136392703	136393043	+
chr1	136466616	136476023	+
chr1	136466616	136477100	+
chr1	136466616	136512168	+
chr1	136466637	136466724	+
chr1	136476984	136491204	+
chr1	136476984	136501633	+
chr1	136483457	136501633	+
chr1	136590854	136596352	+
chr1	136636097	136637008	-
chr1	136735115	136754848	+
chr1	136759320	136797746	+
chr1	136797238	136801241	+
chr1	137040871	137041171	+
chr1	137219924	137221668	+
chr1	137245437	137247214	+
chr1	137245599	137259271	+
chr1	137287274	137288483	+
chr1	137372217	137387584	+
chr1	137504489	137568451	+
chr1	137654760	137655100	+
chr1	137673224	137684911	+
chr1	138049529	138050771	-
chr1	138056143	138056821	-
chr1	140431496	140435753	+
chr1	140671382	140674678	+
chr1	140671382	140683030	+
chr1	140701946	140704608	+
chr1	141274413	141278890	-
chr1	141486241	141494309	+
chr1	141486241	141501160	+
chr1	141502971	141504516	+
chr1	141604890	141612336	-
chr1	141607416	141612336	-
chr1	141627115	141627620	+
chr1	141730669	141731470	-
chr1	141774417	141797448	-
chr1	141777187	141777932	-
chr1	141795365	141797452	-
chr1	141982454	141989824	+
chr1	141982454	141994380	+
chr1	141993841	141994380	+
chr1	142496404	142523870	-
chr1	142525117	142527425	-
chr1	142576021	142578248	+
chr1	142576038	142577513	+
chr1	142576038	142578248	+
chr1	142578060	142579723	+
chr1	142595328	142595550	-
chr1	142617448	142618213	-
chr1	142617448	142635716	-
chr1	142633279	142635716	-
chr1	142656544	142656765	+
chr1	142694717	142704324	-
chr1	142716065	142721364	+
chr1	142768873	142768999	-
chr1	142893339	142895620	-
chr1	142910081	142916046	-
chr1	142920882	142926148	-
chr1	142955183	142958492	-
chr1	142955206	142958492	-
chr1	142958353	142966444	-
chr1	143156541	143156667	-
chr1	143205263	143222705	+
chr1	143214052	143222705	+
chr1	143217740	143219262	+
chr1	143219837	143231793	+
chr1	143219837	143232840	+
chr1	143222547	143239435	+
chr1	143231693	143249745	+
chr1	143231693	143262310	+
chr1	143237580	143242222	+
chr1	143239018	143242222	+
chr1	143245292	143252559	+
chr1	143245292	143262310	+
chr1	143245292	143272864	+
chr1	143245292	143280515	+
chr1	143245292	143285303	+
chr1	143245292	143291819	+
chr1	143245292	143294885	+
chr1	143248375	143256012	+
chr1	143249642	143253079	+
chr1	143249642	143291819	+
chr1	143254878	143294885	+
chr1	143267764	143285303	+
chr1	143271554	143283419	+
chr1	143271554	143285303	+
chr1	143275813	143276166	+
chr1	143279274	143285303	+
chr1	143285206	143291819	+
chr1	143292927	143293929	+
chr1	143296817	143303263	+
chr1	143361256	143365464	+
chr1	143361256	143375185	+
chr1	143361256	143405910	+
chr1	143396358	143405910	+
chr1	143396358	143420938	+
chr1	143396358	143449923	+
chr1	143403894	143426509	+
chr1	143460230	143463105	+
chr1	143462516	143463105	+
chr1	143473267	143474541	+
chr1	143554899	143555714	+
chr1	143582720	143607354	-
chr1	143618928	143620481	-
chr1	143716907	143722519	-
chr1	143756830	143759164	-
chr1	143757996	143779304	-
chr1	143819042	143831209	+
chr1	143819153	143850973	+
chr1	143823189	143823273	+
chr1	143823401	143823788	+
chr1	143823473	143823795	+
chr1	143823951	143824106	+
chr1	143824421	143824700	+
chr1	143830110	143837586	+
chr1	143830870	143844559	+
chr1	143833231	143834412	+
chr1	143833231	143837586	+
chr1	143833231	143839322	+
chr1	143833231	143843694	+
chr1	143836280	143839322	+
chr1	143836280	143843694	+
chr1	143837555	143843602	+
chr1	143842822	143843622	+
chr1	143843574	143844536	+
chr1	143848244	143848717	+
chr1	143850970	143851399	+
chr1	143853371	143861486	-
chr1	143860562	143861486	-
chr1	143860562	143862926	-
chr1	143861277	143861486	-
chr1	143862756	143865061	-
chr1	143866994	143868041	-
chr1	143866994	143868402	-
chr1	143913390	143913607	-
chr1	143927837	143978082	-
chr1	143930282	143939373	-
chr1	143930282	143956984	-
chr1	143930282	143978082	-
chr1	143932186	143978082	-
chr1	143939293	143978082	-
chr1	143941216	143956984	-
chr1	143941216	143959062	-
chr1	143941216	143978082	-
chr1	143945706	143956984	-
chr1	143945706	143971028	-
chr1	143945706	143978082	-
chr1	143955136	143971028	-
chr1	143955136	143978082	-
chr1	143955136	143988318	-
chr1	143956887	143971028	-
chr1	143956887	143978082	-
chr1	143956887	143982568	-
chr1	143958995	143978082	-
chr1	143961915	143978082	-
chr1	143970845	143978082	-
chr1	143970845	143982568	-
chr1	143976149	143976403	-
chr1	143995378	144007016	+
chr1	143998939	144013993	+
chr1	144001830	144020737	+
chr1	144011614	144032230	+
chr1	144095303	144117578	+
chr1	144433221	144453986	+
chr1	144470560	144474096	+
chr1	144470560	144480057	+
chr1	144470560	144484131	+
chr1	144474044	144484131	+
chr1	144479850	144480057	+
chr1	144479850	144484131	+
chr1	144631185	144641421	-
chr1	144705006	144705962	+
chr1	144705006	144706137	+
chr1	144729932	144732163	+
chr1	144729932	144740947	+
chr1	144735805	144740947	+
chr1	144737981	144738643	+
chr1	144737981	144740947	+
chr1	144912205	144913759	+
chr1	144913638	144914862	+
chr1	144927615	144927993	+
chr1	144961073	144962691	-
chr1	144963273	144964336	-
chr1	144965636	144969354	-
chr1	144984557	145007808	-
chr1	145025378	145033335	-
chr1	145073743	145075658	-
chr1	145237108	145250816	-
chr1	145262883	145306999	+
chr1	145262883	145307889	+
chr1	145394701	145403239	+
chr1	145394701	145409818	+
chr1	145394701	145414361	+
chr1	145394701	145414361	-
chr1	145394701	145417869	+
chr1	145394701	145438147	+
chr1	145394701	145486713	+
chr1	145401677	145403239	+
chr1	145401677	145413053	+
chr1	145408742	145417869	+
chr1	145408742	145430902	+
chr1	145408742	145439488	+
chr1	145412857	145417869	+
chr1	145412857	145436055	+
chr1	145412857	145438147	+
chr1	145412857	145439488	+
chr1	145412857	145486713	+
chr1	145414293	145417869	+
chr1	145414293	145427730	+
chr1	145416171	145417869	+
chr1	145416171	145436055	+
chr1	145416171	145438147	+
chr1	145416171	145439488	+
chr1	145416857	145429216	+
chr1	145416857	145436055	+
chr1	145416857	145439488	+
chr1	145416857	145486713	+
chr1	145429098	145436055	+
chr1	145429098	145438147	+
chr1	145429098	145467243	+
chr1	145429098	145486713	+
chr1	145435887	145438147	+
chr1	145435887	145486713	+
chr1	145436545	145438147	+
chr1	145516222	145516596	-
chr1	145707192	145707915	+
chr1	145715609	145715831	-
chr1	145783802	145786629	-
chr1	145786526	145797387	-
chr1	145989080	145989233	-
chr1	145992908	146004384	-
chr1	146002557	146003111	-
chr1	146063112	146063392	+
chr1	146214622	146249488	-
chr1	146236292	146238974	-
chr1	146236292	146245609	-
chr1	146438184	146441172	+
chr1	146438184	146443334	+
chr1	146448951	146490748	-
chr1	146449293	146451445	-
chr1	146451287	146490748	-
chr1	146479135	146479848	-
chr1	146847995	146854843	-
chr1	146907221	146908031	-
chr1	146912897	146916846	-
chr1	146914061	146914847	-
chr1	147777273	147779858	-
chr1	147794117	147800074	+
chr1	148254442	148256175	+
chr1	148258629	148259015	+
chr1	148277880	148292614	-
chr1	148284300	148292614	-
chr1	148284300	148294177	-
chr1	148459941	148497434	-
chr1	148474710	148497434	-
chr1	148503389	148504085	-
chr1	150143416	150165475	-
chr1	150164992	150167397	-
chr1	150198977	150210530	-
chr1	151769348	151805605	-
chr1	151769348	151814884	-
chr1	151838759	151841907	+
chr1	152023402	152024459	+
chr1	152311285	152326850	-
chr1	152319828	152326850	-
chr1	152319828	152333953	-
chr1	152333785	152340314	-
chr1	152342914	152345691	-
chr1	152414447	152417503	+
chr1	152414460	152415274	+
chr1	152415688	152416673	+
chr1	152416609	152417445	+
chr1	152417289	152417474	+
chr1	152417316	152417503	+
chr1	152417489	152417601	+
chr1	152633398	152641110	+
chr1	152639230	152641837	+
chr1	152958344	152963489	+
chr1	153224254	153226225	-
chr1	153224254	153286295	-
chr1	153286144	153291270	-
chr1	153313645	153317052	-
chr1	153531657	153557035	-
chr1	153667154	153667299	-
chr1	153683538	153695164	-
chr1	153686791	153687095	-
chr1	153731102	153731334	-
chr1	153739864	153747458	-
chr1	153798361	153853777	-
chr1	154040952	154044985	+
chr1	154041166	154041309	+
chr1	154041922	154042632	+
chr1	154042142	154044575	+
chr1	154042521	154046852	+
chr1	154043692	154046438	+
chr1	154043783	154044299	+
chr1	154044639	154044864	+
chr1	154044639	154044954	+
chr1	154045513	154046126	+
chr1	154046394	154047505	+
chr1	154046710	154047491	+
chr1	154082448	154098927	-
chr1	154082448	154123607	-
chr1	154082448	154126484	-
chr1	154082448	154126487	-
chr1	154082448	154150097	-
chr1	154123429	154150097	-
chr1	154129152	154129290	-
chr1	154142805	154150097	-
chr1	154199343	154223816	+
chr1	154220723	154223816	+
chr1	154220726	154223816	+
chr1	154299283	154339318	+
chr1	154299378	154339318	+
chr1	154336618	154339318	+
chr1	154560773	154575893	-
chr1	154649288	154653274	+
chr1	154649288	154667163	+
chr1	154649485	154653274	+
chr1	154651993	154653274	+
chr1	154651993	154686597	+
chr1	154851066	154907052	-
chr1	154901708	154916931	-
chr1	154971346	154972576	-
chr1	155008679	155010998	-
chr1	155040583	155109668	+
chr1	155379405	155381426	-
chr1	155800961	155803095	+
chr1	155804205	155805849	+
chr1	156020860	156021356	-
chr1	157477686	157486077	+
chr1	157500054	157507946	+
chr1	157783524	157856795	+
chr1	157809436	157823318	+
chr1	157816757	157823318	+
chr1	157816757	157831683	+
chr1	157816757	157857097	+
chr1	157816757	157871438	+
chr1	157816757	157879888	+
chr1	157819967	157823318	+
chr1	157819967	157857097	+
chr1	157849876	157857097	+
chr1	157849876	157867791	+
chr1	157849876	157872989	+
chr1	157849876	157879888	+
chr1	157850072	157892305	+
chr1	157855850	157879888	+
chr1	157867646	157871438	+
chr1	157889011	157889096	+
chr1	157899542	157900216	+
chr1	158006611	158009360	+
chr1	158009245	158009360	+
chr1	159400329	159485334	-
chr1	159463310	159468251	-
chr1	159826498	159836323	+
chr1	159829162	159842770	+
chr1	159829162	159848110	+
chr1	159865216	159905970	-
chr1	159876745	159881378	-
chr1	159878122	159905970	-
chr1	159880606	159905970	-
chr1	159894749	159905970	-
chr1	159899220	159905970	-
chr1	159904575	159905970	-
chr1	159929663	159934310	-
chr1	159929663	159936086	-
chr1	161056361	161058128	+
chr1	161192140	161193203	-
chr1	161192140	161194504	-
chr1	161192140	161204051	-
chr1	161192983	161204051	-
chr1	161192983	161219481	-
chr1	161194395	161204051	-
chr1	161194395	161224772	-
chr1	161199572	161220652	-
chr1	161224495	161224772	-
chr1	161224495	161253222	-
chr1	161542333	161550700	-
chr1	161582985	161605398	-
chr1	161699775	161725572	-
chr1	161699775	161745277	-
chr1	161699775	161765610	-
chr1	161704138	161765610	-
chr1	161713075	161745277	-
chr1	161713075	161765610	-
chr1	161725477	161765610	-
chr1	161745225	161765610	-
chr1	161752060	161781848	-
chr1	161762116	161765610	-
chr1	161765501	161771667	-
chr1	161765501	161781848	-
chr1	163154362	163154665	+
chr1	163273806	163304446	-
chr1	163294247	163328608	-
chr1	163301979	163304446	-
chr1	163327113	163328608	-
chr1	163898504	163900405	+
chr1	164771984	164772537	-
chr1	164778103	164779104	+
chr1	165244000	165244744	+
chr1	165270114	165284055	+
chr1	165283934	165313946	+
chr1	165549344	165551332	+
chr1	165928057	165936429	+
chr1	168963441	168972320	-
chr1	169086118	169092791	+
chr1	169095483	169132503	+
chr1	169095525	169132503	+
chr1	169119050	169132503	+
chr1	169133733	169146593	+
chr1	169140729	169141920	+
chr1	169304334	169335560	+
chr1	170776264	170784594	+
chr1	170780925	170784594	+
chr1	173618717	173632145	+
chr1	173629385	173635777	+
chr1	175574068	175576751	-
chr1	175780780	175796474	+
chr1	175785800	175796474	+
chr1	175796282	175806614	+
chr1	175915957	175916410	+
chr1	176124368	176127623	-
chr1	176142564	176156456	-
chr1	176156293	176159751	-
chr1	176156293	176177307	-
chr1	176156293	176186618	-
chr1	176156293	176234880	-
chr1	176170426	176179909	-
chr1	176170426	176186618	-
chr1	176170426	176208863	-
chr1	176208696	176228000	-
chr1	176227874	176234880	-
chr1	176374363	176392159	+
chr1	176374363	176396678	+
chr1	176376706	176389232	+
chr1	176376706	176394308	+
chr1	176386092	176394308	+
chr1	176389137	176394308	+
chr1	176389137	176396678	+
chr1	176389137	176399133	+
chr1	176411116	176411696	+
chr1	176411663	176412012	+
chr1	176688298	176725812	-
chr1	176695146	176725812	-
chr1	176695146	176761238	-
chr1	176699509	176725812	-
chr1	176704620	176716763	-
chr1	176709916	176725812	-
chr1	176738720	176761238	-
chr1	176740563	176742136	-
chr1	176752031	176761238	-
chr1	176789553	176792357	+
chr1	176789553	176794911	+
chr1	176789553	176797284	+
chr1	176792235	176797284	+
chr1	176794812	176815836	+
chr1	176805304	176815836	+
chr1	176806313	176813255	+
chr1	176806313	176815836	+
chr1	176814882	176833339	+
[truncated: 31,285 more rows]

## Sheet: C(CIRI)
Prediction of circRNA candidates from rRNA-depleted libraries by CIRI
Chrom	Start	End	Strand	Region	Hosting isoform
chr1	1035496	1090971	-	intron	ENSSSCT00000004431.2,
chr1	1175729	1187482	+	intergenic_region	n/a
chr1	2150622	2238552	-	intergenic_region	n/a
chr1	2750752	2770778	-	exon	ENSSSCT00000004443.2,
chr1	2775861	2790071	-	exon	ENSSSCT00000004443.2,
chr1	2805468	2814551	-	exon	ENSSSCT00000004443.2,
chr1	2808657	2814551	-	exon	ENSSSCT00000004443.2,
chr1	3637677	3648716	+	exon	ENSSSCT00000004447.2,
chr1	6384646	6385507	-	intron	ENSSSCT00000004455.2,
chr1	6417991	6418134	-	exon	ENSSSCT00000004455.2,
chr1	6417991	6486326	-	exon	ENSSSCT00000004455.2,
chr1	6460850	6486326	-	intron	ENSSSCT00000004455.2,
chr1	6463387	6486326	-	intron	ENSSSCT00000004455.2,
chr1	6464869	6486326	-	exon	ENSSSCT00000004455.2,
chr1	6486184	6486326	-	exon	ENSSSCT00000004455.2,
chr1	8314884	8318075	+	exon	ENSSSCT00000004462.2,ENSSSCT00000036162.1,
chr1	8795511	8844270	-	exon	ENSSSCT00000004467.2,
chr1	8808426	8844270	-	exon	ENSSSCT00000004467.2,
chr1	8838522	8844270	-	exon	ENSSSCT00000004467.2,
chr1	9185006	9188014	-	exon	ENSSSCT00000004472.3,
chr1	9240839	9251868	-	exon	ENSSSCT00000004472.3,
chr1	9392359	9397924	+	exon	ENSSSCT00000004476.2,
chr1	9393570	9397339	+	exon	ENSSSCT00000004476.2,
chr1	9397164	9398731	+	exon	ENSSSCT00000004476.2,
chr1	9397801	9398731	+	exon	ENSSSCT00000004476.2,
chr1	10817302	10819507	-	intergenic_region	n/a
chr1	11016279	11163707	-	intergenic_region	n/a
chr1	11262087	11271143	-	exon	ENSSSCT00000030285.1,
chr1	11290049	11292201	-	exon	ENSSSCT00000030285.1,
chr1	11314741	11319029	-	exon	ENSSSCT00000030285.1,
chr1	11849149	11915854	+	intergenic_region	n/a
chr1	12075808	12234659	+	intergenic_region	n/a
chr1	12093964	12234659	+	intergenic_region	n/a
chr1	13620132	13621384	-	intron	ENSSSCT00000031943.1,
chr1	13630780	13632958	-	exon	ENSSSCT00000027128.1,ENSSSCT00000004494.2,
chr1	13745741	13747109	+	intergenic_region	n/a
chr1	13891762	13894768	+	exon	ENSSSCT00000023199.1,
chr1	14083797	14085261	-	exon	ENSSSCT00000004499.2,
chr1	14083797	14086548	-	exon	ENSSSCT00000004499.2,
chr1	14083797	14107726	-	exon	ENSSSCT00000004499.2,
chr1	14092852	14103753	-	exon	ENSSSCT00000004499.2,
chr1	14096258	14103753	-	exon	ENSSSCT00000004499.2,
chr1	14099143	14103118	-	exon	ENSSSCT00000004499.2,
chr1	14099143	14103753	-	exon	ENSSSCT00000004499.2,
chr1	14099143	14107726	-	exon	ENSSSCT00000004499.2,
chr1	14101396	14103753	-	exon	ENSSSCT00000004499.2,
chr1	14699637	14752959	-	intergenic_region	n/a
chr1	15907346	15948518	-	intergenic_region	n/a
chr1	16040188	16040666	-	intergenic_region	n/a
chr1	16080529	16183454	-	exon	ENSSSCT00000004510.2,
chr1	16338911	16340328	+	exon	ENSSSCT00000031249.1,
chr1	16348340	16357950	+	exon	ENSSSCT00000031249.1,
chr1	16356085	16357950	+	exon	ENSSSCT00000031249.1,
chr1	16367466	16370192	-	intron	ENSSSCT00000031249.1,
chr1	16375887	16381029	+	intron	ENSSSCT00000031249.1,
chr1	16375912	16381029	+	exon	ENSSSCT00000031249.1,
chr1	16379739	16381029	+	exon	ENSSSCT00000031249.1,
chr1	16385819	16390764	+	intergenic_region	n/a
chr1	16393882	16395904	+	exon	ENSSSCT00000004511.2,
chr1	16396790	16400038	+	exon	ENSSSCT00000004511.2,
chr1	16415160	16473752	+	exon	ENSSSCT00000004511.2,
chr1	16415160	16480830	+	intron	ENSSSCT00000004511.2,
chr1	16415160	16481887	+	exon	ENSSSCT00000004511.2,
chr1	16415160	16494951	+	exon	ENSSSCT00000004511.2,
chr1	16421005	16421729	+	exon	ENSSSCT00000004511.2,
chr1	16463108	16473752	+	exon	ENSSSCT00000004511.2,
chr1	16472494	16473752	+	exon	ENSSSCT00000004511.2,
chr1	16492760	16494951	+	exon	ENSSSCT00000004511.2,
chr1	16603165	16604241	+	intron	ENSSSCT00000004515.2,
chr1	16779138	16871069	-	intergenic_region	n/a
chr1	16779138	16889979	-	intergenic_region	n/a
chr1	17075533	17134778	-	exon	ENSSSCT00000030322.1,ENSSSCT00000004518.2,
chr1	17233498	17248742	+	exon	ENSSSCT00000004520.2,
chr1	17236721	17240990	+	exon	ENSSSCT00000004520.2,
chr1	17236721	17248742	+	exon	ENSSSCT00000004520.2,
chr1	17240890	17248742	+	exon	ENSSSCT00000004520.2,
chr1	17240890	17261849	+	exon	ENSSSCT00000004520.2,
chr1	17240890	17262608	+	exon	ENSSSCT00000004520.2,
chr1	18201035	18353859	+	intergenic_region	n/a
chr1	18440912	18451652	+	exon	ENSSSCT00000004538.2,
chr1	18451548	18457305	+	exon	ENSSSCT00000004538.2,
chr1	18451548	18462171	+	exon	ENSSSCT00000004538.2,
chr1	18451548	18462218	+	intergenic_region	n/a
chr1	18455231	18462218	+	intergenic_region	n/a
chr1	18633147	18633632	+	exon	ENSSSCT00000004541.2,
chr1	18661830	18663491	-	exon	ENSSSCT00000004539.2,
chr1	18675426	18720511	+	exon	ENSSSCT00000024741.1,
chr1	18675426	18725069	+	exon	ENSSSCT00000024741.1,
chr1	18675426	18734033	+	exon	ENSSSCT00000024741.1,
chr1	18679112	18725069	+	exon	ENSSSCT00000024741.1,
chr1	18698062	18701550	+	exon	ENSSSCT00000004543.2,
chr1	18698062	18702826	+	exon	ENSSSCT00000004543.2,
chr1	21200690	21222409	-	exon	ENSSSCT00000004553.2,
chr1	21231837	21249088	-	intergenic_region	n/a
chr1	21865210	21869835	+	exon	ENSSSCT00000004555.2,
chr1	21865210	21879171	+	exon	ENSSSCT00000004555.2,
chr1	21887692	21897987	+	exon	ENSSSCT00000004555.2,
chr1	21887692	21903641	+	exon	ENSSSCT00000004555.2,
chr1	21932221	21933228	+	exon	ENSSSCT00000004555.2,
chr1	22008331	22010368	+	exon	ENSSSCT00000004556.2,
chr1	22086461	22126571	+	exon	ENSSSCT00000004557.2,
chr1	22086461	22134742	+	exon	ENSSSCT00000004557.2,
chr1	22126330	22134742	+	exon	ENSSSCT00000004557.2,
chr1	23010569	23016578	-	exon	ENSSSCT00000004558.2,
chr1	23015794	23016578	-	exon	ENSSSCT00000004558.2,
chr1	23166052	23167558	-	intergenic_region	n/a
chr1	23232804	23239705	-	intergenic_region	n/a
chr1	23262192	23266361	-	intron	ENSSSCT00000030687.1,
chr1	23262198	23266361	-	exon	ENSSSCT00000030687.1,
chr1	23646297	23664663	+	intergenic_region	n/a
chr1	23903660	23922097	-	intron	ENSSSCT00000004567.2,
chr1	24724428	24792185	+	intergenic_region	n/a
chr1	24724428	24857916	+	intergenic_region	n/a
chr1	24730806	24792185	+	intergenic_region	n/a
chr1	24730806	24857916	+	intergenic_region	n/a
chr1	24792108	24857916	+	intergenic_region	n/a
chr1	24792111	24802415	+	intergenic_region	n/a
chr1	24792111	24857916	+	intergenic_region	n/a
chr1	25357026	25360852	+	exon	ENSSSCT00000004574.2,
chr1	25360229	25360852	+	exon	ENSSSCT00000004574.2,
chr1	25510519	25540318	-	exon	ENSSSCT00000004575.2,
chr1	25510519	25589991	-	intergenic_region	n/a
chr1	25518797	25540318	-	exon	ENSSSCT00000004575.2,
chr1	25518797	25589991	-	intergenic_region	n/a
chr1	25529966	25540318	-	exon	ENSSSCT00000004575.2,
chr1	28449591	28531105	-	intergenic_region	n/a
chr1	28454469	28531105	-	intergenic_region	n/a
chr1	28454987	28531105	-	intergenic_region	n/a
chr1	28460560	28531105	-	intergenic_region	n/a
chr1	28524200	28531105	-	exon	ENSSSCT00000004580.2,
chr1	28662025	28675347	+	exon	ENSSSCT00000004582.3,
chr1	28693778	28695193	+	exon	ENSSSCT00000004582.3,
chr1	30747601	30804116	+	intron	ENSSSCT00000025418.1,ENSSSCT00000034480.1,
chr1	30986498	31001898	+	exon	ENSSSCT00000025418.1,
chr1	31384842	31394302	+	exon	ENSSSCT00000004604.2,
chr1	31387491	31394302	+	exon	ENSSSCT00000004604.2,
chr1	31387491	31412699	+	exon	ENSSSCT00000004604.2,
chr1	31389962	31428147	+	exon	ENSSSCT00000004604.2,
chr1	31412608	31421810	+	exon	ENSSSCT00000004604.2,
chr1	31419390	31428147	+	exon	ENSSSCT00000004604.2,
chr1	31500055	31502732	-	exon	ENSSSCT00000004602.2,
chr1	31501248	31502732	-	exon	ENSSSCT00000004602.2,
chr1	32054762	32072573	+	exon	ENSSSCT00000004605.2,
chr1	32080657	32169111	+	exon	ENSSSCT00000004605.2,
chr1	32509604	32527213	+	exon	ENSSSCT00000004608.2,
chr1	32509604	32533892	+	exon	ENSSSCT00000004608.2,
chr1	33407640	33415246	-	exon	ENSSSCT00000030224.1,
chr1	35154798	35171254	+	intergenic_region	n/a
chr1	35488669	35489992	-	exon	ENSSSCT00000030957.1,ENSSSCT00000004637.2,
chr1	35489847	35493291	-	exon	ENSSSCT00000030957.1,ENSSSCT00000004637.2,
chr1	35916790	35983002	+	exon	ENSSSCT00000004640.2,
chr1	36705595	36710567	-	exon	ENSSSCT00000004644.2,
chr1	36705595	36712852	-	exon	ENSSSCT00000004644.2,
chr1	36715010	36718719	-	exon	ENSSSCT00000004644.2,
chr1	37134829	37137964	+	exon	ENSSSCT00000004646.2,
chr1	37134829	37143270	+	exon	ENSSSCT00000004646.2,
chr1	37134829	37147403	+	exon	ENSSSCT00000004646.2,
chr1	37316187	37509843	-	exon	ENSSSCT00000004648.2,
chr1	37369084	37545495	-	intergenic_region	n/a
chr1	37400352	37545495	-	intergenic_region	n/a
chr1	39602177	39627811	-	intergenic_region	n/a
chr1	40737383	40747135	-	exon	ENSSSCT00000004665.2,
chr1	40737383	40751473	-	intron	ENSSSCT00000004665.2,
chr1	40737383	40764451	-	exon	ENSSSCT00000004665.2,
chr1	40737383	40767556	-	exon	ENSSSCT00000004665.2,
chr1	40759887	40760525	-	exon	ENSSSCT00000004665.2,
chr1	40759887	40767556	-	exon	ENSSSCT00000004665.2,
chr1	40891902	40936935	-	exon	ENSSSCT00000027938.1,
chr1	41655344	41731269	-	intergenic_region	n/a
chr1	43484629	43504220	+	exon	ENSSSCT00000029492.1,
chr1	43484629	43518628	+	exon	ENSSSCT00000029492.1,
chr1	43484629	43522155	+	exon	ENSSSCT00000029492.1,
chr1	43504197	43531244	-	exon	ENSSSCT00000029492.1,
chr1	43518575	43584779	+	intergenic_region	n/a
chr1	43518575	43689044	+	intergenic_region	n/a
chr1	43531215	43531397	+	exon	ENSSSCT00000029492.1,
chr1	43531215	43584779	+	intergenic_region	n/a
chr1	43566145	43584779	+	intergenic_region	n/a
chr1	43566145	43644080	+	intergenic_region	n/a
chr1	43566145	43669021	+	intergenic_region	n/a
chr1	43583860	43644080	+	intergenic_region	n/a
chr1	43583860	43669021	+	intergenic_region	n/a
chr1	43637118	43658887	+	intergenic_region	n/a
chr1	43637118	43669021	+	intergenic_region	n/a
chr1	43637118	43687836	+	intergenic_region	n/a
chr1	43654114	43658887	+	intergenic_region	n/a
chr1	43654114	43669021	+	intergenic_region	n/a
chr1	43654856	43658887	+	intergenic_region	n/a
chr1	43658710	43710923	+	intergenic_region	n/a
chr1	43658710	43723126	+	intergenic_region	n/a
chr1	43658710	43761162	+	intergenic_region	n/a
chr1	43668974	43723126	+	intergenic_region	n/a
chr1	43687789	43723126	+	intergenic_region	n/a
chr1	43704397	43710923	+	intergenic_region	n/a
chr1	43745384	43766415	+	intergenic_region	n/a
chr1	43753498	43787681	+	intergenic_region	n/a
chr1	43759328	43766415	+	intergenic_region	n/a
chr1	44437423	44540267	+	intergenic_region	n/a
chr1	44439811	44443134	+	exon	ENSSSCT00000004682.2,
chr1	44454221	44469456	-	exon	ENSSSCT00000004683.2,
chr1	44462994	44469456	-	exon	ENSSSCT00000004683.2,
chr1	44537106	44540267	+	exon	ENSSSCT00000028955.1,
chr1	45701230	45706203	+	exon	ENSSSCT00000004689.2,
chr1	45701230	45764360	+	exon	ENSSSCT00000004689.2,
chr1	48636668	48636829	+	exon	ENSSSCT00000004696.2,
chr1	48636668	48671226	+	exon	ENSSSCT00000004696.2,
chr1	48670439	48736020	+	exon	ENSSSCT00000004696.2,
chr1	48764823	48766484	-	intron	ENSSSCT00000004696.2,
chr1	49106605	49188719	-	intron	ENSSSCT00000004697.2,
chr1	49498577	49500948	-	intergenic_region	n/a
chr1	49510303	49517462	-	exon	ENSSSCT00000030561.1,
chr1	49650665	49657101	-	exon	ENSSSCT00000004702.2,
chr1	49668384	49672750	-	exon	ENSSSCT00000004702.2,
chr1	49668384	49674605	-	exon	ENSSSCT00000004702.2,
chr1	49672699	49695061	-	exon	ENSSSCT00000004702.2,
chr1	49748316	49759398	-	intergenic_region	n/a
chr1	49807727	49823047	+	exon	ENSSSCT00000029401.1,
chr1	50514830	50516588	+	intron	ENSSSCT00000026265.1,
chr1	50514830	50517149	+	intron	ENSSSCT00000026265.1,
chr1	50514830	50518742	+	intron	ENSSSCT00000026265.1,
chr1	50514833	50516588	+	intron	ENSSSCT00000026265.1,
chr1	50514833	50517149	+	intron	ENSSSCT00000026265.1,
chr1	50514833	50518742	+	intron	ENSSSCT00000026265.1,
chr1	50516496	50517149	+	exon	ENSSSCT00000026265.1,
chr1	56058918	56063865	-	exon	ENSSSCT00000004721.2,
chr1	56096587	56109914	-	exon	ENSSSCT00000004721.2,
chr1	57105762	57195641	+	exon	ENSSSCT00000004726.2,
chr1	57195566	57275978	+	intron	ENSSSCT00000004726.2,
chr1	58460995	58517592	+	exon	ENSSSCT00000004730.2,
chr1	58468249	58517592	+	exon	ENSSSCT00000004730.2,
chr1	58472238	58517592	+	intron	ENSSSCT00000004730.2,
chr1	58484449	58517592	+	exon	ENSSSCT00000004730.2,
chr1	58779715	58805318	+	intergenic_region	n/a
chr1	59090959	59101967	+	intergenic_region	n/a
chr1	59101877	59138159	+	exon	ENSSSCT00000026479.1,
chr1	59707496	59715138	-	exon	ENSSSCT00000004742.2,
chr1	59726631	59744379	-	exon	ENSSSCT00000004742.2,
chr1	59728051	59744379	-	exon	ENSSSCT00000004742.2,
chr1	59739762	59744379	-	exon	ENSSSCT00000004742.2,
chr1	60436312	60443757	-	intergenic_region	n/a
chr1	60892775	60900407	-	exon	ENSSSCT00000004747.2,
chr1	60892775	60924967	-	exon	ENSSSCT00000004747.2,
chr1	60893530	60900407	-	exon	ENSSSCT00000004747.2,
chr1	60893530	60924967	-	exon	ENSSSCT00000004747.2,
chr1	60896460	60897286	-	exon	ENSSSCT00000004747.2,
chr1	60896460	60919037	-	intron	ENSSSCT00000004747.2,
chr1	60917934	60932819	-	exon	ENSSSCT00000004747.2,
chr1	60917934	60959765	-	exon	ENSSSCT00000004747.2,
chr1	60924835	60932819	-	exon	ENSSSCT00000004747.2,
chr1	60924835	60959765	-	exon	ENSSSCT00000004747.2,
chr1	60958627	60959765	-	exon	ENSSSCT00000004747.2,
chr1	61006639	61007238	-	exon	ENSSSCT00000004748.2,
chr1	62359384	62362228	+	exon	ENSSSCT00000029112.1,
chr1	62359384	62363760	+	intron	ENSSSCT00000029112.1,
chr1	62517228	62536805	+	intergenic_region	n/a
chr1	62630181	62632427	+	exon	ENSSSCT00000004757.2,
chr1	62688792	62693450	+	exon	ENSSSCT00000004761.2,
chr1	62694950	62699277	+	exon	ENSSSCT00000004761.2,
chr1	63702370	63729178	-	intergenic_region	n/a
chr1	63827196	63872257	-	intergenic_region	n/a
chr1	63969190	63975086	+	exon	ENSSSCT00000004769.2,
chr1	64530710	64532147	+	exon	ENSSSCT00000004778.2,
chr1	64731985	64735305	-	exon	ENSSSCT00000004785.2,
chr1	64739890	64750734	-	exon	ENSSSCT00000004785.2,
chr1	71050734	71055642	+	intron	ENSSSCT00000004793.2,
chr1	72651152	72656373	+	exon	ENSSSCT00000031034.1,
chr1	74429977	74460814	-	exon	ENSSSCT00000004804.2,
chr1	74443452	74470252	-	exon	ENSSSCT00000004804.2,
chr1	75082709	75101925	-	exon	ENSSSCT00000004808.2,
chr1	80241844	80293999	-	exon	ENSSSCT00000004823.2,
chr1	80327077	80328942	-	exon	ENSSSCT00000004823.2,
chr1	80332936	80347867	-	exon	ENSSSCT00000004823.2,
chr1	80356327	80365853	-	exon	ENSSSCT00000004823.2,
chr1	80660555	80671102	-	exon	ENSSSCT00000004825.2,ENSSSCT00000004826.1,
chr1	80669934	80671102	-	exon	ENSSSCT00000004825.2,ENSSSCT00000004826.1,
chr1	80703289	80705328	-	exon	ENSSSCT00000004828.2,
chr1	82062492	82105874	-	intergenic_region	n/a
chr1	83314425	83323066	-	exon	ENSSSCT00000004844.2,
chr1	83671902	83700348	+	intergenic_region	n/a
chr1	84047500	84048935	+	exon	ENSSSCT00000004849.2,
chr1	84362746	84369923	-	exon	ENSSSCT00000004853.2,
chr1	84723988	84732574	-	exon	ENSSSCT00000004877.3,ENSSSCT00000033167.1,
chr1	85692377	85703772	+	exon	ENSSSCT00000004866.2,
chr1	86114517	86185934	+	intergenic_region	n/a
chr1	86117059	86185934	+	intergenic_region	n/a
chr1	86215836	86230282	+	exon	ENSSSCT00000004858.2,
chr1	86333461	86342031	-	exon	ENSSSCT00000004857.2,
chr1	86577009	86580240	+	exon	ENSSSCT00000026193.1,
chr1	86577009	86583712	+	exon	ENSSSCT00000026193.1,
chr1	86577009	86612583	+	exon	ENSSSCT00000026193.1,
chr1	86878851	86954593	-	intergenic_region	n/a
chr1	86889727	86954593	-	intergenic_region	n/a
chr1	89934335	89940816	-	exon	ENSSSCT00000004897.2,
chr1	89934335	89947529	-	exon	ENSSSCT00000004897.2,
chr1	89940534	89940816	-	exon	ENSSSCT00000004897.2,
chr1	89946850	89947529	-	exon	ENSSSCT00000004897.2,
chr1	89946850	89951181	-	exon	ENSSSCT00000004897.2,
chr1	92392757	92400835	+	exon	ENSSSCT00000004911.2,
chr1	92839218	92845471	+	exon	ENSSSCT00000004918.2,
chr1	93126380	93142829	+	exon	ENSSSCT00000004920.2,
chr1	93269648	93277132	+	exon	ENSSSCT00000004922.2,
chr1	93396709	93415072	-	exon	ENSSSCT00000035912.1,
chr1	93560104	93566176	-	exon	ENSSSCT00000025129.1,
chr1	94539852	94546236	+	exon	ENSSSCT00000004926.2,
chr1	94556573	94577735	+	exon	ENSSSCT00000004926.2,
chr1	94559522	94575209	+	exon	ENSSSCT00000004926.2,
chr1	94568797	94577735	+	exon	ENSSSCT00000004926.2,
chr1	94575046	94577735	+	exon	ENSSSCT00000004926.2,
chr1	94575046	94595460	+	exon	ENSSSCT00000004926.2,
chr1	96437297	96526968	+	intron	ENSSSCT00000024946.1,
chr1	96785770	96802706	-	intergenic_region	n/a
chr1	96792819	96806044	-	exon	ENSSSCT00000004933.2,
chr1	96802617	96806044	-	exon	ENSSSCT00000004933.2,
chr1	97175019	97176916	-	intergenic_region	n/a
chr1	97905979	97924771	+	exon	ENSSSCT00000004941.2,
chr1	101178705	101180415	-	exon	ENSSSCT00000026640.1,
chr1	101178705	101190143	-	exon	ENSSSCT00000026640.1,
chr1	101482924	101554111	-	intergenic_region	n/a
chr1	101627933	101630402	+	exon	ENSSSCT00000004949.2,
chr1	101693272	101694439	+	intergenic_region	n/a
chr1	101704036	101706552	+	intergenic_region	n/a
chr1	101706423	101710750	+	intergenic_region	n/a
chr1	103173037	103183452	-	exon	ENSSSCT00000035127.1,ENSSSCT00000004956.2,ENSSSCT00000035901.1,
chr1	103504055	103509525	-	exon	ENSSSCT00000004958.2,ENSSSCT00000024890.1,
chr1	103512707	103513105	-	exon	ENSSSCT00000004958.2,ENSSSCT00000024890.1,
chr1	103946010	103946660	-	intergenic_region	n/a
chr1	105572600	105708064	-	intergenic_region	n/a
chr1	105833834	105842695	-	exon	ENSSSCT00000004968.2,
chr1	105833834	105854597	-	exon	ENSSSCT00000004968.2,
chr1	105833834	105870732	-	exon	ENSSSCT00000004968.2,
chr1	105944306	105950799	+	exon	ENSSSCT00000004971.1,
chr1	105950020	105950799	+	exon	ENSSSCT00000004971.1,
chr1	105951342	105951833	+	exon	ENSSSCT00000004971.1,
chr1	106025647	106026431	+	exon	ENSSSCT00000004972.2,
chr1	106924970	106929326	-	intron	ENSSSCT00000004977.2,
chr1	107800905	107885700	+	intron	ENSSSCT00000004978.2,
chr1	107807534	107835060	+	intron	ENSSSCT00000004978.2,
chr1	107808627	107835060	+	exon	ENSSSCT00000004978.2,
chr1	107929920	107933933	+	exon	ENSSSCT00000004978.2,
chr1	108448292	108449692	-	exon	ENSSSCT00000027450.1,
chr1	108480412	108482233	+	exon	ENSSSCT00000030202.1,
chr1	108509329	108581209	-	intergenic_region	n/a
chr1	110525008	110532832	+	exon	ENSSSCT00000004997.1,
chr1	110525008	110538400	+	exon	ENSSSCT00000004997.1,
chr1	110525008	110548336	+	exon	ENSSSCT00000004997.1,
chr1	110525008	110561827	+	exon	ENSSSCT00000004997.1,
chr1	110525008	110561873	+	exon	ENSSSCT00000004997.1,
chr1	110532620	110538400	+	exon	ENSSSCT00000004997.1,
chr1	110532620	110548336	+	exon	ENSSSCT00000004997.1,
chr1	113957632	113959372	-	exon	ENSSSCT00000005002.2,
chr1	114030308	114049837	-	intron	ENSSSCT00000005002.2,
chr1	114109375	114116975	+	exon	ENSSSCT00000005003.2,
chr1	114109375	114121891	+	exon	ENSSSCT00000005003.2,
chr1	114174958	114184187	+	exon	ENSSSCT00000005005.2,
chr1	115163045	115173093	-	exon	ENSSSCT00000036325.1,ENSSSCT00000036505.1,ENSSSCT00000005009.3,
chr1	115244034	115244724	-	intergenic_region	n/a
chr1	115244034	115295202	-	intergenic_region	n/a
chr1	115244034	115353534	-	intergenic_region	n/a
chr1	116733953	116748998	-	exon	ENSSSCT00000005011.2,
chr1	116736713	116748998	-	exon	ENSSSCT00000005011.2,
chr1	116747311	116748998	-	exon	ENSSSCT00000005011.2,
chr1	116898188	116900708	+	exon	ENSSSCT00000005012.2,
chr1	116900620	116917868	+	exon	ENSSSCT00000005012.2,
chr1	117494797	117498416	+	exon	ENSSSCT00000005017.2,
chr1	117496938	117498416	+	exon	ENSSSCT00000005017.2,
chr1	117504416	117508579	+	exon	ENSSSCT00000005017.2,
chr1	117505463	117508579	+	exon	ENSSSCT00000005017.2,
chr1	117805367	117922917	+	intergenic_region	n/a
chr1	118360630	118378712	-	intron	ENSSSCT00000005027.2,
chr1	118377839	118378712	-	exon	ENSSSCT00000005027.2,
chr1	118441847	118445673	-	exon	ENSSSCT00000005028.2,
chr1	118608831	118609231	-	intergenic_region	n/a
chr1	118835829	118837146	+	exon	ENSSSCT00000005033.2,
chr1	118997321	118997601	-	exon	ENSSSCT00000028843.1,
chr1	119484768	119485168	+	exon	ENSSSCT00000005038.2,
chr1	119589318	119598313	+	exon	ENSSSCT00000005040.2,
chr1	119639317	119643524	-	exon	ENSSSCT00000028774.1,
chr1	120217260	120222613	+	exon	ENSSSCT00000005049.2,
chr1	120220840	120221244	-	exon	ENSSSCT00000005049.2,
chr1	120220840	120221260	-	exon	ENSSSCT00000005049.2,
chr1	120220840	120221794	-	exon	ENSSSCT00000005049.2,
chr1	120222576	120226027	-	exon	ENSSSCT00000005049.2,
chr1	120465232	120476695	-	intergenic_region	n/a
chr1	120465232	120481968	-	intergenic_region	n/a
chr1	120492326	120506659	-	exon	ENSSSCT00000028013.1,
chr1	120514454	120517295	-	intergenic_region	n/a
chr1	120607344	120625949	-	intergenic_region	n/a
chr1	120698326	120698912	-	intergenic_region	n/a
chr1	121462435	121467570	+	intergenic_region	n/a
chr1	121462435	121470382	+	intergenic_region	n/a
chr1	122589604	122590226	+	intergenic_region	n/a
chr1	123053053	123054608	+	intergenic_region	n/a
chr1	124772986	124785165	+	exon	ENSSSCT00000005066.2,
chr1	124801758	124816635	+	exon	ENSSSCT00000005066.2,
chr1	124861734	124877611	+	exon	ENSSSCT00000005066.2,
chr1	124875218	124884580	+	exon	ENSSSCT00000005066.2,
chr1	124997045	125013992	-	exon	ENSSSCT00000005070.2,
chr1	125013097	125013992	-	exon	ENSSSCT00000005070.2,
chr1	125143608	125147013	+	exon	ENSSSCT00000005073.2,
chr1	125143608	125147925	+	exon	ENSSSCT00000005073.2,
chr1	125143608	125162014	+	exon	ENSSSCT00000005073.2,
chr1	125146816	125147925	+	exon	ENSSSCT00000005073.2,
chr1	125216286	125219611	-	exon	ENSSSCT00000005071.2,
chr1	125219032	125219611	-	exon	ENSSSCT00000005071.2,
chr1	125384211	125499226	-	intergenic_region	n/a
chr1	126147153	126149673	-	exon	ENSSSCT00000024465.1,
chr1	126926296	126928380	-	exon	ENSSSCT00000005081.2,
chr1	126926296	126936954	-	exon	ENSSSCT00000005081.2,
chr1	126947681	126950090	-	exon	ENSSSCT00000034080.1,ENSSSCT00000005081.2,
chr1	127112257	127113254	-	intron	ENSSSCT00000005081.2,
chr1	127113152	127147715	-	exon	ENSSSCT00000005081.2,
chr1	127604961	127637341	+	intron	ENSSSCT00000028724.1,
chr1	127622340	127641705	+	exon	ENSSSCT00000028724.1,
chr1	127627761	127641705	+	exon	ENSSSCT00000028724.1,
chr1	127641289	127641705	+	exon	ENSSSCT00000028724.1,
chr1	127648623	127652412	+	exon	ENSSSCT00000028724.1,
chr1	127648623	127695635	+	exon	ENSSSCT00000028724.1,
chr1	127652255	127653574	+	exon	ENSSSCT00000028724.1,
chr1	127997793	128023881	-	exon	ENSSSCT00000005083.2,
chr1	127997793	128030115	-	exon	ENSSSCT00000005083.2,
chr1	127997793	128031634	-	intron	ENSSSCT00000005083.2,
chr1	127997793	128040020	-	exon	ENSSSCT00000005083.2,
chr1	128019978	128023881	-	exon	ENSSSCT00000005083.2,
chr1	128019978	128030115	-	exon	ENSSSCT00000005083.2,
chr1	128019978	128040020	-	exon	ENSSSCT00000005083.2,
chr1	128019978	128046977	-	intron	ENSSSCT00000005083.2,
chr1	128682226	128695939	+	intergenic_region	n/a
chr1	128694118	128742827	+	intergenic_region	n/a
chr1	129020947	129028855	+	exon	ENSSSCT00000005091.2,
chr1	132148098	132159987	+	exon	ENSSSCT00000005098.2,
chr1	132216524	132221585	+	intron	ENSSSCT00000005100.1,
chr1	132216531	132221585	+	intron	ENSSSCT00000005100.1,
chr1	132344010	132347527	+	exon	ENSSSCT00000005103.2,
chr1	132344010	132356808	+	exon	ENSSSCT00000005103.2,
chr1	132441607	132453607	+	exon	ENSSSCT00000005103.2,
chr1	132817550	132830751	-	exon	ENSSSCT00000005107.2,
chr1	132825590	132830751	-	exon	ENSSSCT00000005107.2,
chr1	132828553	132830751	-	exon	ENSSSCT00000005107.2,
chr1	132965230	132974980	-	exon	ENSSSCT00000005109.2,
chr1	132995834	133000011	-	exon	ENSSSCT00000005109.2,
chr1	133338956	133348678	+	intergenic_region	n/a
chr1	133499719	133512016	-	exon	ENSSSCT00000005116.2,
chr1	134284841	134300133	-	exon	ENSSSCT00000025088.1,ENSSSCT00000005118.2,
chr1	134518067	134536714	+	intron	ENSSSCT00000005120.2,
chr1	134518071	134536714	+	intron	ENSSSCT00000005120.2,
chr1	134555419	134556263	+	exon	ENSSSCT00000005120.2,
chr1	134599618	134607972	+	exon	ENSSSCT00000005121.2,
chr1	134599618	134619308	+	exon	ENSSSCT00000005121.2,
chr1	134632355	134636559	+	exon	ENSSSCT00000005121.2,
chr1	134632355	134654676	+	exon	ENSSSCT00000005121.2,
chr1	134632355	134655932	+	exon	ENSSSCT00000005121.2,
chr1	134632355	134657483	+	exon	ENSSSCT00000005121.2,
chr1	134632355	134661090	+	intron	ENSSSCT00000005121.2,
chr1	134640969	134659892	+	exon	ENSSSCT00000005121.2,
chr1	134653309	134655932	+	exon	ENSSSCT00000005121.2,
chr1	134655800	134667697	+	exon	ENSSSCT00000005121.2,
chr1	134656768	134667697	+	exon	ENSSSCT00000005121.2,
chr1	134656768	134670263	+	exon	ENSSSCT00000005121.2,
chr1	134656768	134675125	+	exon	ENSSSCT00000005121.2,
chr1	134656768	134677703	+	exon	ENSSSCT00000005121.2,
chr1	134656768	134679346	+	exon	ENSSSCT00000005121.2,
chr1	134659825	134670263	+	exon	ENSSSCT00000005121.2,
chr1	134659825	134675125	+	exon	ENSSSCT00000005121.2,
chr1	134756874	134758013	-	exon	ENSSSCT00000005124.2,
chr1	134770024	134774718	-	exon	ENSSSCT00000005124.2,
chr1	134782801	134787969	-	exon	ENSSSCT00000005124.2,
chr1	134790067	134797103	-	exon	ENSSSCT00000005124.2,
chr1	135097123	135106264	+	exon	ENSSSCT00000005130.2,
chr1	135303493	135500271	+	intron	ENSSSCT00000005131.2,
chr1	135757993	135792442	-	intergenic_region	n/a
chr1	135829826	135910108	+	intergenic_region	n/a
chr1	135900642	136032804	-	intergenic_region	n/a
chr1	136203228	136275220	-	exon	ENSSSCT00000005136.2,
chr1	136271279	136275220	-	exon	ENSSSCT00000005136.2,
chr1	136271279	136291811	-	exon	ENSSSCT00000005136.2,
chr1	136384655	136393043	+	exon	ENSSSCT00000005137.2,
chr1	136466617	136477100	+	exon	ENSSSCT00000005138.2,
chr1	137027940	137136487	+	intergenic_region	n/a
chr1	137031784	137136487	+	intergenic_region	n/a
chr1	137504490	137568451	+	intergenic_region	n/a
chr1	141607417	141612336	-	exon	ENSSSCT00000028050.1,
chr1	141822796	141994380	+	intergenic_region	n/a
chr1	141824210	141994380	+	intergenic_region	n/a
chr1	141982455	141989824	+	exon	ENSSSCT00000005183.2,
chr1	141982455	141994380	+	exon	ENSSSCT00000005183.2,
chr1	141993842	141994380	+	exon	ENSSSCT00000005183.2,
chr1	142525118	142527425	-	exon	ENSSSCT00000005185.2,
chr1	142576039	142577513	+	intergenic_region	n/a
chr1	142576039	142578248	+	intergenic_region	n/a
chr1	142893340	142895620	-	exon	ENSSSCT00000005200.2,
chr1	142958354	142966444	-	exon	ENSSSCT00000005202.2,
chr1	142976243	142977395	-	exon	ENSSSCT00000005202.2,
chr1	143245293	143262310	+	exon	ENSSSCT00000005209.2,ENSSSCT00000032277.1,
chr1	143245293	143275786	+	exon	ENSSSCT00000005209.2,ENSSSCT00000032277.1,
chr1	143267765	143285303	+	exon	ENSSSCT00000005209.2,ENSSSCT00000032277.1,
chr1	143279275	143291819	+	exon	ENSSSCT00000005209.2,ENSSSCT00000032277.1,
chr1	143285207	143291819	+	exon	ENSSSCT00000005209.2,ENSSSCT00000032277.1,
chr1	143396359	143426509	+	exon	ENSSSCT00000005210.2,
chr1	143757997	143779304	-	intron	ENSSSCT00000005220.2,
chr1	143819043	143831209	+	exon	ENSSSCT00000005218.2,
chr1	143823952	143824106	-	exon	ENSSSCT00000005218.2,
chr1	143833232	143834412	+	exon	ENSSSCT00000005218.2,
chr1	143833232	143837586	+	exon	ENSSSCT00000005218.2,
chr1	143833232	143839322	+	exon	ENSSSCT00000005218.2,
chr1	143833232	143843694	+	exon	ENSSSCT00000005218.2,
chr1	143860563	143862926	-	exon	ENSSSCT00000005221.2,ENSSSCT00000005224.2,
chr1	143927838	143978082	-	exon	ENSSSCT00000005225.2,
chr1	143930283	143978082	-	exon	ENSSSCT00000005225.2,
chr1	143939294	143956984	-	exon	ENSSSCT00000005225.2,
chr1	143939294	143978082	-	exon	ENSSSCT00000005225.2,
chr1	143945707	143978082	-	exon	ENSSSCT00000005225.2,
chr1	143955137	143971028	-	exon	ENSSSCT00000005225.2,
chr1	143955137	143978082	-	exon	ENSSSCT00000005225.2,
chr1	143956888	143971028	-	exon	ENSSSCT00000005225.2,
chr1	143956888	143978082	-	exon	ENSSSCT00000005225.2,
chr1	143958996	143978082	-	exon	ENSSSCT00000005225.2,
chr1	143970846	143978082	-	exon	ENSSSCT00000005225.2,
chr1	143998940	144007016	+	exon	ENSSSCT00000005226.2,
chr1	143998940	144013993	+	exon	ENSSSCT00000005226.2,
chr1	144474045	144480057	+	exon	ENSSSCT00000005235.2,
chr1	144474045	144484131	+	exon	ENSSSCT00000005235.2,
chr1	144479851	144480057	+	exon	ENSSSCT00000005235.2,
chr1	144479851	144484131	+	exon	ENSSSCT00000005235.2,
chr1	144705007	144705962	+	exon	ENSSSCT00000005236.2,
chr1	144705007	144706137	+	exon	ENSSSCT00000005236.2,
chr1	144729933	144740947	+	intergenic_region	n/a
chr1	144913639	144914862	+	exon	ENSSSCT00000005244.2,
chr1	144963274	144964336	-	exon	ENSSSCT00000031282.1,ENSSSCT00000005246.2,
chr1	144984558	145007808	-	intron	ENSSSCT00000005246.2,ENSSSCT00000031282.1,
chr1	145031571	145050748	-	intergenic_region	n/a
chr1	145394702	145403239	+	intergenic_region	n/a
chr1	145394702	145413053	+	intergenic_region	n/a
chr1	145394702	145414361	+	intergenic_region	n/a
chr1	145394702	145417869	+	intergenic_region	n/a
chr1	145408743	145417869	+	exon	ENSSSCT00000005252.2,
chr1	145408743	145439488	+	exon	ENSSSCT00000005252.2,
chr1	145412858	145417869	+	exon	ENSSSCT00000005252.2,
chr1	145412858	145436055	+	exon	ENSSSCT00000005252.2,
chr1	145412858	145438147	+	exon	ENSSSCT00000005252.2,
chr1	145416172	145417869	+	exon	ENSSSCT00000005252.2,
chr1	145416172	145436055	+	exon	ENSSSCT00000005252.2,
chr1	145425643	145439488	+	exon	ENSSSCT00000005252.2,
chr1	145429099	145436055	+	exon	ENSSSCT00000005252.2,
chr1	145429099	145438147	+	exon	ENSSSCT00000005252.2,
chr1	145435888	145438147	+	exon	ENSSSCT00000005252.2,
chr1	145436546	145438147	+	exon	ENSSSCT00000005252.2,
chr1	145783803	145786629	-	exon	ENSSSCT00000005265.1,
chr1	146214623	146249488	-	intergenic_region	n/a
chr1	146236293	146245609	-	exon	ENSSSCT00000005281.2,
chr1	146438185	146441172	+	intergenic_region	n/a
chr1	147794118	147800074	+	intergenic_region	n/a
chr1	148277881	148292614	-	exon	ENSSSCT00000005291.2,
chr1	148284301	148292614	-	exon	ENSSSCT00000023236.1,ENSSSCT00000005291.2,
chr1	148459942	148497434	-	exon	ENSSSCT00000005292.1,
chr1	148474711	148497434	-	exon	ENSSSCT00000005292.1,
chr1	150164993	150167397	-	intron	ENSSSCT00000027483.1,ENSSSCT00000028778.1,
chr1	151769349	151814884	-	intergenic_region	n/a
chr1	152171873	152353086	-	intergenic_region	n/a
chr1	152234222	152380690	+	intergenic_region	n/a
chr1	152319829	152326850	-	exon	ENSSSCT00000005301.2,
chr1	152340211	152347427	-	exon	ENSSSCT00000005301.2,
chr1	153224255	153226225	-	intergenic_region	n/a
chr1	153313646	153317052	-	exon	ENSSSCT00000030424.1,
chr1	153562296	153565321	-	exon	ENSSSCT00000005311.3,
chr1	154082449	154123607	-	exon	ENSSSCT00000005313.2,
chr1	154199344	154223816	+	intergenic_region	n/a
chr1	154220724	154223816	+	intergenic_region	n/a
chr1	154223045	154224534	+	intergenic_region	n/a
chr1	154299284	154339318	+	exon	ENSSSCT00000005314.2,
chr1	154336619	154339318	+	exon	ENSSSCT00000005314.2,
chr1	157816758	157823318	+	exon	ENSSSCT00000005334.2,
chr1	157816758	157831683	+	intron	ENSSSCT00000005334.2,
chr1	157816758	157879888	+	exon	ENSSSCT00000005334.2,
chr1	157849877	157879888	+	exon	ENSSSCT00000005334.2,
chr1	159880607	159905970	-	exon	ENSSSCT00000005347.2,
chr1	159894750	159905970	-	exon	ENSSSCT00000005347.2,
chr1	159899221	159905970	-	exon	ENSSSCT00000005347.2,
chr1	159929664	159936086	-	exon	ENSSSCT00000005351.2,
chr1	161056362	161058068	+	exon	ENSSSCT00000005359.2,
chr1	161192141	161193203	-	exon	ENSSSCT00000024292.1,
chr1	161192141	161194504	-	exon	ENSSSCT00000024292.1,
chr1	161192141	161204051	-	exon	ENSSSCT00000024292.1,
chr1	161192141	161220652	-	exon	ENSSSCT00000024292.1,
chr1	161192984	161204051	-	exon	ENSSSCT00000024292.1,
chr1	161194396	161204051	-	exon	ENSSSCT00000024292.1,
chr1	161224496	161253222	-	exon	ENSSSCT00000024292.1,
chr1	161699776	161765610	-	exon	ENSSSCT00000005363.2,ENSSSCT00000005360.2,
chr1	161713076	161745277	-	exon	ENSSSCT00000005363.2,ENSSSCT00000005360.2,
chr1	161713076	161765610	-	exon	ENSSSCT00000005363.2,ENSSSCT00000005360.2,
chr1	161725478	161765610	-	exon	ENSSSCT00000005363.2,ENSSSCT00000005360.2,
chr1	161745226	161765610	-	exon	ENSSSCT00000005363.2,ENSSSCT00000005360.2,
chr1	161765502	161771667	-	exon	ENSSSCT00000005363.2,ENSSSCT00000005360.2,
chr1	161765502	161781848	-	exon	ENSSSCT00000005360.2,
chr1	163301980	163304446	-	exon	ENSSSCT00000025136.1,
chr1	163301980	163328608	-	exon	ENSSSCT00000025136.1,
chr1	169095484	169132503	+	intergenic_region	n/a
chr1	169119051	169132503	+	intergenic_region	n/a
chr1	169304335	169335560	+	intergenic_region	n/a
chr1	170767319	170768956	+	exon	ENSSSCT00000005390.2,
chr1	170776265	170784594	+	exon	ENSSSCT00000005390.2,
chr1	173618718	173635777	+	exon	ENSSSCT00000005392.2,
chr1	175574069	175576751	-	exon	ENSSSCT00000005399.2,
chr1	176170427	176179909	-	exon	ENSSSCT00000005402.2,
chr1	176376707	176394308	+	exon	ENSSSCT00000005403.2,
chr1	176386093	176394308	+	exon	ENSSSCT00000005403.2,
chr1	176389138	176394308	+	exon	ENSSSCT00000005403.2,
chr1	176688299	176725812	-	exon	ENSSSCT00000005405.2,
chr1	176712182	176725812	-	exon	ENSSSCT00000005405.2,
chr1	176738721	176761238	-	exon	ENSSSCT00000005405.2,
chr1	176805305	176815836	+	exon	ENSSSCT00000005407.2,
chr1	176806314	176815836	+	exon	ENSSSCT00000005407.2,
chr1	176836675	176840819	+	exon	ENSSSCT00000005407.2,
chr1	179196287	179198685	+	exon	ENSSSCT00000005415.2,
chr1	179850163	179856151	+	exon	ENSSSCT00000005427.2,
chr1	179872334	179877666	+	exon	ENSSSCT00000005427.2,
chr1	179974930	179981667	-	exon	ENSSSCT00000005428.2,ENSSSCT00000005429.2,
chr1	180708440	180715180	-	exon	ENSSSCT00000005437.2,
chr1	180714491	180715180	-	exon	ENSSSCT00000005437.2,
chr1	180714491	180723180	-	exon	ENSSSCT00000005437.2,
chr1	180736416	180737438	-	exon	ENSSSCT00000005437.2,
chr1	180980388	180983496	-	exon	ENSSSCT00000025179.1,ENSSSCT00000005441.2,
chr1	180980388	180983615	-	intron	ENSSSCT00000025179.1,ENSSSCT00000005441.2,
chr1	180982417	180998696	-	exon	ENSSSCT00000025179.1,ENSSSCT00000005441.2,
chr1	181028804	181029908	-	exon	ENSSSCT00000032958.1,ENSSSCT00000033955.1,ENSSSCT00000034461.1,ENSSSCT00000035603.1,ENSSSCT00000036317.1,ENSSSCT00000033892.1,ENSSSCT00000005445.2,ENSSSCT00000035110.1,ENSSSCT00000034112.1,
chr1	181031656	181055410	-	exon	ENSSSCT00000005445.2,ENSSSCT00000033955.1,ENSSSCT00000035110.1,ENSSSCT00000034461.1,ENSSSCT00000033892.1,
chr1	181041196	181046448	-	exon	ENSSSCT00000033562.1,ENSSSCT00000034461.1,ENSSSCT00000035603.1,ENSSSCT00000036317.1,ENSSSCT00000033892.1,ENSSSCT00000005445.2,ENSSSCT00000035110.1,ENSSSCT00000034112.1,
chr1	181050309	181059423	-	exon	ENSSSCT00000034461.1,ENSSSCT00000035603.1,ENSSSCT00000036317.1,ENSSSCT00000033892.1,ENSSSCT00000005445.2,ENSSSCT00000035110.1,ENSSSCT00000034112.1,
chr1	181051819	181055410	-	exon	ENSSSCT00000005445.2,ENSSSCT00000035110.1,ENSSSCT00000034461.1,ENSSSCT00000034112.1,ENSSSCT00000036317.1,ENSSSCT00000033892.1,
chr1	181051819	181059423	-	exon	ENSSSCT00000005445.2,ENSSSCT00000035110.1,ENSSSCT00000034461.1,ENSSSCT00000034112.1,ENSSSCT00000035603.1,ENSSSCT00000036317.1,ENSSSCT00000033892.1,
chr1	181057330	181066687	-	exon	ENSSSCT00000033955.1,ENSSSCT00000034461.1,ENSSSCT00000035603.1,ENSSSCT00000036317.1,ENSSSCT00000033892.1,ENSSSCT00000005445.2,ENSSSCT00000035110.1,ENSSSCT00000034112.1,
chr1	181133477	181135013	+	intron	ENSSSCT00000005446.2,ENSSSCT00000025793.1,
chr1	181133477	181136271	+	intron	ENSSSCT00000005446.2,ENSSSCT00000025793.1,
chr1	181145447	181159028	-	exon	ENSSSCT00000005447.2,ENSSSCT00000030635.1,
chr1	181157215	181159028	-	exon	ENSSSCT00000005447.2,ENSSSCT00000030635.1,
chr1	181325593	181330850	-	exon	ENSSSCT00000005449.2,
chr1	181330431	181330850	-	exon	ENSSSCT00000005449.2,
chr1	181349907	181353955	-	exon	ENSSSCT00000005449.2,
chr1	181400580	181405184	-	intron	ENSSSCT00000005449.2,
chr1	181484717	181485339	-	exon	ENSSSCT00000024720.1,
chr1	182079981	182082885	+	exon	ENSSSCT00000005453.2,ENSSSCT00000024119.1,
chr1	182105237	182108503	+	exon	ENSSSCT00000005453.2,ENSSSCT00000024119.1,
chr1	182114095	182120613	-	exon	ENSSSCT00000005454.2,
chr1	182854630	182860290	+	exon	ENSSSCT00000005463.2,
chr1	182855369	182860290	+	exon	ENSSSCT00000005463.2,
chr1	182856036	182860290	+	exon	ENSSSCT00000005463.2,
chr1	182908618	182911527	-	exon	ENSSSCT00000005464.2,
chr1	183329729	183362450	+	exon	ENSSSCT00000036194.1,
chr1	183813973	183835431	+	exon	ENSSSCT00000005470.2,
chr1	185283215	185286221	+	exon	ENSSSCT00000005481.2,
chr1	186651443	186657838	-	exon	ENSSSCT00000005485.2,
chr1	186656379	186657838	-	exon	ENSSSCT00000005485.2,
chr1	186656379	186659227	-	exon	ENSSSCT00000005485.2,
chr1	186657166	186657838	-	exon	ENSSSCT00000005485.2,
chr1	187609942	187623258	-	exon	ENSSSCT00000023869.1,
chr1	188117293	188121283	-	exon	ENSSSCT00000005491.2,
chr1	188117293	188122298	-	exon	ENSSSCT00000005491.2,
chr1	188117293	188127728	-	exon	ENSSSCT00000005491.2,
chr1	188119162	188121283	-	exon	ENSSSCT00000005491.2,
chr1	188136744	188179860	-	intergenic_region	n/a
chr1	188143622	188179860	-	intergenic_region	n/a
chr1	188147577	188179860	-	intergenic_region	n/a
chr1	188150674	188179860	-	exon	ENSSSCT00000022878.1,
chr1	188159439	188179860	-	exon	ENSSSCT00000022878.1,
chr1	188165875	188179860	-	exon	ENSSSCT00000022878.1,
chr1	188418093	188420669	+	exon	ENSSSCT00000005500.2,
chr1	188418093	188423148	+	exon	ENSSSCT00000005500.2,
chr1	195022523	195026279	+	exon	ENSSSCT00000025268.1,
chr1	195029560	195115065	+	exon	ENSSSCT00000025268.1,
chr1	195112533	195114161	+	exon	ENSSSCT00000025268.1,
chr1	195112533	195115065	+	exon	ENSSSCT00000025268.1,
chr1	195113989	195115065	+	exon	ENSSSCT00000025268.1,
chr1	195169049	195177620	+	exon	ENSSSCT00000005511.2,
chr1	195169049	195178170	+	exon	ENSSSCT00000005511.2,
chr1	195174339	195178170	+	exon	ENSSSCT00000005511.2,
chr1	195174339	195179852	+	exon	ENSSSCT00000005511.2,
chr1	195179688	195180293	+	exon	ENSSSCT00000005511.2,
chr1	195188814	195189760	-	exon	ENSSSCT00000005513.2,
chr1	195242228	195244121	-	exon	ENSSSCT00000030082.1,ENSSSCT00000005515.2,
chr1	199959801	199971098	-	exon	ENSSSCT00000027331.1,ENSSSCT00000005527.2,
chr1	199962719	199971098	-	exon	ENSSSCT00000027331.1,ENSSSCT00000005527.2,
chr1	199966226	199971098	-	exon	ENSSSCT00000027331.1,ENSSSCT00000005527.2,
chr1	199984968	199990936	-	exon	ENSSSCT00000027331.1,ENSSSCT00000005527.2,
chr1	200269189	200277626	-	exon	ENSSSCT00000005531.2,
chr1	200269189	200281803	-	exon	ENSSSCT00000005531.2,
chr1	200269189	200290416	-	exon	ENSSSCT00000005531.2,
chr1	200281377	200287684	-	exon	ENSSSCT00000005531.2,
chr1	200281377	200298109	-	exon	ENSSSCT00000005531.2,
chr1	200287462	200298109	-	exon	ENSSSCT00000005531.2,
chr1	200298028	200299664	-	exon	ENSSSCT00000005531.2,
chr1	200299009	200299664	-	exon	ENSSSCT00000005531.2,
chr1	200300327	200334231	-	exon	ENSSSCT00000005531.2,
chr1	200310792	200338610	-	exon	ENSSSCT00000005531.2,
chr1	200325282	200338610	-	exon	ENSSSCT00000005531.2,
chr1	200424357	200425409	-	intergenic_region	n/a
chr1	200530333	200536451	-	intergenic_region	n/a
chr1	200530333	200542898	-	intergenic_region	n/a
chr1	200698016	200721973	-	exon	ENSSSCT00000005537.2,
chr1	200703767	200721973	-	exon	ENSSSCT00000005537.2,
chr1	200721530	200721973	-	exon	ENSSSCT00000005537.2,
chr1	200817316	200840229	-	exon	ENSSSCT00000005538.2,ENSSSCT00000032295.1,
chr1	200818206	200840229	-	exon	ENSSSCT00000005538.2,ENSSSCT00000032295.1,
chr1	201223748	201230161	+	exon	ENSSSCT00000028405.1,
chr1	201225539	201230161	+	exon	ENSSSCT00000028405.1,
chr1	201664903	201675876	+	exon	ENSSSCT00000005543.2,
chr1	201668388	201671933	+	exon	ENSSSCT00000005543.2,
chr1	201668388	201675876	+	exon	ENSSSCT00000005543.2,
chr1	202012272	202016291	-	exon	ENSSSCT00000005546.2,
chr1	202490137	202523454	-	intron	ENSSSCT00000005553.2,
chr1	202513334	202523454	-	intron	ENSSSCT00000005553.2,
chr1	202577196	202579416	-	intron	ENSSSCT00000005553.2,
chr1	202605803	202611451	+	exon	ENSSSCT00000005554.2,
chr1	202605803	202611659	+	exon	ENSSSCT00000005554.2,
chr1	202605803	202612325	+	exon	ENSSSCT00000005554.2,
chr1	202606369	202611659	+	exon	ENSSSCT00000005554.2,
chr1	202609214	202611659	+	exon	ENSSSCT00000005554.2,
chr1	202611390	202611659	+	exon	ENSSSCT00000005554.2,
chr1	202611390	202612325	+	exon	ENSSSCT00000005554.2,
chr1	202612264	202619041	+	exon	ENSSSCT00000005554.2,
chr1	202614698	202619041	+	exon	ENSSSCT00000005554.2,
chr1	202644306	202656440	+	exon	ENSSSCT00000005555.2,
chr1	202644306	202659321	+	exon	ENSSSCT00000005555.2,
chr1	202656404	202671463	+	exon	ENSSSCT00000005555.2,
chr1	202793118	202807301	-	exon	ENSSSCT00000005557.2,
chr1	202793118	202813336	-	exon	ENSSSCT00000005557.2,
chr1	202805859	202816405	-	intergenic_region	n/a
chr1	202809063	202813336	-	exon	ENSSSCT00000005557.2,
chr1	202815825	202816405	-	intergenic_region	n/a
chr1	202861414	202873392	+	exon	ENSSSCT00000005558.2,
chr1	202944045	202986161	-	exon	ENSSSCT00000025969.1,ENSSSCT00000005559.2,
chr1	202954152	202986161	-	exon	ENSSSCT00000025969.1,ENSSSCT00000005559.2,
chr1	202963753	202986161	-	exon	ENSSSCT00000025969.1,ENSSSCT00000005559.2,
chr1	202974507	202986161	-	exon	ENSSSCT00000025969.1,ENSSSCT00000005559.2,
chr1	203916561	204076963	+	intergenic_region	n/a
chr1	204797064	204798169	-	exon	ENSSSCT00000027382.1,ENSSSCT00000005569.2,
chr1	204819151	204828419	-	exon	ENSSSCT00000027382.1,ENSSSCT00000005569.2,
chr1	204835343	204836699	-	exon	ENSSSCT00000027382.1,ENSSSCT00000005569.2,
chr1	204885769	204944457	-	intergenic_region	n/a
chr1	205002128	205003641	-	exon	ENSSSCT00000005573.2,
chr1	205265275	205267698	-	exon	ENSSSCT00000005575.2,
chr1	205265275	205280079	-	exon	ENSSSCT00000005575.2,
chr1	205465515	205472192	+	exon	ENSSSCT00000005577.2,
chr1	205465515	205474960	+	exon	ENSSSCT00000005577.2,
chr1	205465636	205474960	+	exon	ENSSSCT00000005577.2,
chr1	205472022	205474960	+	exon	ENSSSCT00000005577.2,
chr1	205472022	205481309	+	exon	ENSSSCT00000005577.2,
chr1	205472022	205492135	+	exon	ENSSSCT00000005577.2,
chr1	205484419	205496626	+	exon	ENSSSCT00000005577.2,
chr1	205495469	205504202	+	exon	ENSSSCT00000005577.2,
chr1	205511273	205526853	+	exon	ENSSSCT00000005577.2,
chr1	205516889	205526853	+	exon	ENSSSCT00000005577.2,
chr1	206483700	206497014	+	exon	ENSSSCT00000005579.2,
chr1	206990528	206993410	-	exon	ENSSSCT00000005583.2,
chr1	207015843	207018021	+	exon	ENSSSCT00000005582.2,
chr1	207016864	207022469	+	exon	ENSSSCT00000005582.2,
chr1	208103946	208116580	+	exon	ENSSSCT00000005588.2,
chr1	208219319	208227424	+	exon	ENSSSCT00000030515.1,
chr1	208264642	208271965	+	exon	ENSSSCT00000005589.2,
chr1	208292449	208295366	+	exon	ENSSSCT00000005590.2,
chr1	208292449	208305105	+	exon	ENSSSCT00000005590.2,
chr1	208294098	208305105	+	exon	ENSSSCT00000005590.2,
chr1	208304839	208315461	+	exon	ENSSSCT00000005590.2,
chr1	208501653	208513821	+	exon	ENSSSCT00000005594.2,
chr1	210044043	210128769	+	intron	ENSSSCT00000005600.2,
chr1	210246828	210260930	+	exon	ENSSSCT00000005601.2,
chr1	210254703	210260930	+	exon	ENSSSCT00000005601.2,
chr1	210259053	210260930	+	exon	ENSSSCT00000005601.2,
chr1	210440340	210546784	-	intergenic_region	n/a
chr1	210465415	210515589	-	intergenic_region	n/a
chr1	210465415	210546784	-	intergenic_region	n/a
chr1	210499949	210515589	-	intergenic_region	n/a
chr1	210499949	210579784	-	intergenic_region	n/a
chr1	210515489	210546784	-	intergenic_region	n/a
chr1	210515489	210549508	-	intergenic_region	n/a
chr1	210515489	210549792	-	intergenic_region	n/a
chr1	210529078	210546784	-	intergenic_region	n/a
chr1	210529078	210549508	-	intergenic_region	n/a
chr1	210529078	210549792	-	intergenic_region	n/a
chr1	210529078	210579784	-	intergenic_region	n/a
chr1	210532144	210549508	-	intergenic_region	n/a
chr1	212171161	212172500	+	exon	ENSSSCT00000005618.1,
chr1	212691030	212691784	-	intergenic_region	n/a
chr1	215048903	215058575	-	intergenic_region	n/a
chr1	215885411	215888149	-	exon	ENSSSCT00000005633.2,ENSSSCT00000029685.1,
chr1	215885411	215895290	-	exon	ENSSSCT00000005633.2,ENSSSCT00000029685.1,
chr1	216062375	216063829	-	exon	ENSSSCT00000029685.1,ENSSSCT00000005633.2,
chr1	216220855	216299386	+	intergenic_region	n/a
chr1	216314524	216447657	-	intergenic_region	n/a
chr1	216338622	216447657	-	intergenic_region	n/a
chr1	218548517	218551385	-	exon	ENSSSCT00000005649.2,
chr1	218683998	218686093	+	exon	ENSSSCT00000005652.2,
chr1	224091690	224114675	-	exon	ENSSSCT00000005663.2,
chr1	224111540	224114675	-	exon	ENSSSCT00000005663.2,
chr1	225046195	225121846	-	intergenic_region	n/a
chr1	225691245	225694820	-	exon	ENSSSCT00000028872.1,
chr1	225691245	225740450	-	exon	ENSSSCT00000028872.1,
chr1	225691245	225811866	-	exon	ENSSSCT00000028872.1,
chr1	225740193	225811866	-	exon	ENSSSCT00000028872.1,
chr1	225740193	225838303	-	intron	ENSSSCT00000028872.1,
chr1	225751227	225764571	-	exon	ENSSSCT00000028872.1,
chr1	225771871	225808956	-	exon	ENSSSCT00000028872.1,
chr1	225771871	225811866	-	exon	ENSSSCT00000028872.1,
chr1	225790958	225811866	-	exon	ENSSSCT00000028872.1,
chr1	225790958	225838303	-	intron	ENSSSCT00000028872.1,
chr1	226117819	226118520	+	exon	ENSSSCT00000005694.2,
chr1	227101708	227126254	-	intergenic_region	n/a
chr1	227124801	227126254	-	exon	ENSSSCT00000005700.2,
chr1	227144723	227166326	-	intron	ENSSSCT00000005700.2,
chr1	227152127	227155059	-	exon	ENSSSCT00000005700.2,
chr1	227165198	227186649	-	exon	ENSSSCT00000005700.2,
chr1	227181487	227186649	-	exon	ENSSSCT00000005700.2,
chr1	227181487	227197323	-	exon	ENSSSCT00000005700.2,
chr1	227185988	227188489	-	exon	ENSSSCT00000005700.2,
chr1	227185988	227210811	-	exon	ENSSSCT00000005700.2,
chr1	227210490	227210811	-	exon	ENSSSCT00000005700.2,
chr1	227644106	227694491	-	intergenic_region	n/a
chr1	227644106	227703212	-	intergenic_region	n/a
chr1	229173474	229246387	-	exon	ENSSSCT00000005709.2,
chr1	229214112	229296319	-	exon	ENSSSCT00000005709.2,
chr1	229233921	229246387	-	exon	ENSSSCT00000005709.2,
chr1	229233921	229296319	-	exon	ENSSSCT00000005709.2,
chr1	229343179	229344099	-	exon	ENSSSCT00000005709.2,
chr1	230999159	231003021	+	exon	ENSSSCT00000005714.2,
chr1	230999159	231010023	+	exon	ENSSSCT00000005714.2,
chr1	231032079	231051989	-	exon	ENSSSCT00000005715.2,
chr1	231466517	231485647	+	intergenic_region	n/a
chr1	231528885	231531113	-	intergenic_region	n/a
chr1	231595599	231599127	-	exon	ENSSSCT00000005719.2,
chr1	231595599	231604276	-	exon	ENSSSCT00000005719.2,
chr1	231625507	231633622	-	intergenic_region	n/a
chr1	232792268	232793025	+	intergenic_region	n/a
chr1	232982494	233048185	-	intergenic_region	n/a
chr1	233012606	233021193	-	intergenic_region	n/a
chr1	233012606	233048185	-	intergenic_region	n/a
chr1	233128640	233133377	+	exon	ENSSSCT00000005723.2,
chr1	233128640	233154197	+	exon	ENSSSCT00000005723.2,
chr1	233128640	233180602	+	exon	ENSSSCT00000005723.2,
chr1	233131898	233133377	+	exon	ENSSSCT00000005723.2,
chr1	233195418	233196805	+	exon	ENSSSCT00000005723.2,
chr1	238845435	238874793	-	exon	ENSSSCT00000005726.2,
chr1	240860923	240879186	-	exon	ENSSSCT00000005730.2,
chr1	241244047	241247628	+	exon	ENSSSCT00000025343.1,
chr1	241875289	241903294	+	exon	ENSSSCT00000030906.1,ENSSSCT00000005737.2,
chr1	241875289	241916869	+	exon	ENSSSCT00000030906.1,ENSSSCT00000005737.2,
chr1	241875289	241925272	+	exon	ENSSSCT00000030906.1,ENSSSCT00000005737.2,
chr1	241901877	241903294	+	exon	ENSSSCT00000030906.1,ENSSSCT00000005737.2,
chr1	241901877	241925272	+	exon	ENSSSCT00000030906.1,ENSSSCT00000005737.2,
chr1	241901877	241941205	+	exon	ENSSSCT00000030906.1,ENSSSCT00000005737.2,
chr1	241935890	241936327	+	intron	ENSSSCT00000030906.1,ENSSSCT00000005737.2,
chr1	242065637	242066517	+	exon	ENSSSCT00000005739.2,
chr1	242065637	242076349	+	exon	ENSSSCT00000005739.2,
chr1	242131692	242153511	-	exon	ENSSSCT00000005740.2,
chr1	242142862	242143729	-	exon	ENSSSCT00000005740.2,
chr1	242142862	242153511	-	exon	ENSSSCT00000005740.2,
chr1	242160698	242167556	-	exon	ENSSSCT00000005740.2,
chr1	242716644	242731574	-	exon	ENSSSCT00000034678.1,ENSSSCT00000034494.1,ENSSSCT00000005748.2,
chr1	242750212	242786202	-	intergenic_region	n/a
chr1	242785952	242810712	-	intergenic_region	n/a
chr1	243617932	243619051	-	intergenic_region	n/a
chr1	244609706	244619037	+	intergenic_region	n/a
chr1	244832039	244849964	+	exon	ENSSSCT00000005761.2,
chr1	245014431	245020769	-	exon	ENSSSCT00000005763.2,
chr1	245015947	245020769	-	exon	ENSSSCT00000005763.2,
chr1	245115123	245127219	-	intergenic_region	n/a
chr1	245197116	245197999	+	intergenic_region	n/a
chr1	245505757	245526429	-	exon	ENSSSCT00000005766.2,
chr1	245565427	245570849	-	exon	ENSSSCT00000005766.2,
chr1	245565427	245595602	-	exon	ENSSSCT00000005766.2,
chr1	245635102	245640587	-	exon	ENSSSCT00000005766.2,
chr1	247785597	247805744	+	exon	ENSSSCT00000005775.2,
chr1	247961314	247981752	+	exon	ENSSSCT00000005777.2,
chr1	247980561	247981752	+	exon	ENSSSCT00000005777.2,
chr1	248085318	248089574	+	exon	ENSSSCT00000005777.2,
chr1	248529181	248640482	+	intergenic_region	n/a
chr1	248976772	248987202	+	exon	ENSSSCT00000005783.2,
chr1	248990243	248992113	+	intron	ENSSSCT00000005783.2,
chr1	249743639	249911706	-	intergenic_region	n/a
chr1	249743639	249918475	-	intergenic_region	n/a
chr1	249759669	249863571	+	intergenic_region	n/a
chr1	249782241	249907750	-	intergenic_region	n/a
chr1	249850891	249858302	-	exon	ENSSSCT00000022526.1,
chr1	249850891	249910066	-	intergenic_region	n/a
chr1	249850891	249911706	-	intergenic_region	n/a
chr1	249850891	249918475	-	intergenic_region	n/a
chr1	249860013	249867972	+	intron	ENSSSCT00000022526.1,
chr1	249918313	249919430	-	intergenic_region	n/a
chr1	250053841	250054732	+	exon	ENSSSCT00000029337.1,
chr1	251516590	251552157	+	intergenic_region	n/a
chr1	251721539	251726583	-	exon	ENSSSCT00000026305.1,
chr1	254817267	254937077	-	intergenic_region	n/a
chr1	254897497	254934216	-	intergenic_region	n/a
chr1	254897497	254937077	-	intergenic_region	n/a
chr1	254898556	254934216	-	intergenic_region	n/a
chr1	254898556	254937077	-	intergenic_region	n/a
chr1	254931586	254937077	-	intergenic_region	n/a
chr1	254933957	254937077	-	intergenic_region	n/a
chr1	254981227	254982407	-	exon	ENSSSCT00000005806.2,
chr1	255743644	255748862	+	exon	ENSSSCT00000024731.1,
chr1	256805155	256815277	+	exon	ENSSSCT00000005817.2,
chr1	256810606	256815277	+	exon	ENSSSCT00000005817.2,
chr1	256829848	256833654	+	exon	ENSSSCT00000005817.2,
chr1	256829848	256846070	+	exon	ENSSSCT00000005817.2,
chr1	256829848	256855195	+	exon	ENSSSCT00000005817.2,
chr1	256850826	256867750	+	exon	ENSSSCT00000005817.2,
chr1	256867612	256879435	+	exon	ENSSSCT00000005817.2,
chr1	256943805	256946680	+	exon	ENSSSCT00000005817.2,
chr1	256994751	257037086	+	exon	ENSSSCT00000005817.2,
chr1	256998735	257010130	+	exon	ENSSSCT00000005817.2,
chr1	257015250	257018270	+	exon	ENSSSCT00000005817.2,
chr1	257015250	257023798	+	exon	ENSSSCT00000005817.2,
chr1	257015250	257037086	+	exon	ENSSSCT00000005817.2,
chr1	257015250	257041255	+	exon	ENSSSCT00000005817.2,
chr1	257015250	257042814	+	exon	ENSSSCT00000005817.2,
chr1	257015250	257044026	+	exon	ENSSSCT00000005817.2,
chr1	257015250	257067958	+	exon	ENSSSCT00000005817.2,
chr1	257015250	257093728	+	exon	ENSSSCT00000005817.2,
chr1	257022984	257037086	+	exon	ENSSSCT00000005817.2,
chr1	257030254	257037086	+	exon	ENSSSCT00000005817.2,
chr1	257059754	257060032	+	exon	ENSSSCT00000005817.2,
chr1	257754306	257762035	+	exon	ENSSSCT00000005823.2,
chr1	259286768	259329084	+	exon	ENSSSCT00000005825.2,
chr1	259301794	259329084	+	exon	ENSSSCT00000005825.2,
chr1	259376886	259382176	+	exon	ENSSSCT00000005825.2,
chr1	261826096	261826823	-	exon	ENSSSCT00000005828.2,
chr1	263633167	263646983	-	exon	ENSSSCT00000029098.1,
chr1	263638779	263645595	-	exon	ENSSSCT00000029098.1,
chr1	263840380	263879756	+	intergenic_region	n/a
chr1	264034002	264036098	+	exon	ENSSSCT00000005846.2,
chr1	264034002	264042688	+	exon	ENSSSCT00000005846.2,
chr1	264129941	264133947	-	intron	ENSSSCT00000005854.1,
chr1	264130474	264130946	-	exon	ENSSSCT00000005854.1,
chr1	264130485	264130875	-	exon	ENSSSCT00000005854.1,
chr1	264890623	264891198	-	exon	ENSSSCT00000005882.2,
chr1	265189347	265197520	+	exon	ENSSSCT00000005883.2,
chr1	265189347	265213158	+	exon	ENSSSCT00000005883.2,
chr1	265773697	265852140	+	intergenic_region	n/a
chr1	265966523	265969297	+	exon	ENSSSCT00000005885.2,
chr1	266578997	266586615	+	intron	ENSSSCT00000005896.2,
chr1	266578997	266593107	+	exon	ENSSSCT00000005896.2,
chr1	266592910	266606482	+	exon	ENSSSCT00000005896.2,
chr1	266592910	266610386	+	exon	ENSSSCT00000005896.2,
chr1	266604253	266606482	+	exon	ENSSSCT00000005896.2,
chr1	267405743	267409093	+	exon	ENSSSCT00000005904.2,
chr1	267559105	267572799	-	exon	ENSSSCT00000027470.1,
chr1	267559105	267577541	-	exon	ENSSSCT00000027470.1,
chr1	267572656	267608381	-	exon	ENSSSCT00000027470.1,
chr1	267626610	267635109	-	intron	ENSSSCT00000027470.1,ENSSSCT00000005906.2,
chr1	267668334	267690386	-	intron	ENSSSCT00000005908.2,
chr1	267671789	267690386	-	exon	ENSSSCT00000005908.2,
chr1	267674313	267690386	-	exon	ENSSSCT00000005908.2,
chr1	268060776	268074734	+	exon	ENSSSCT00000005913.2,
chr1	269912309	269939970	+	exon	ENSSSCT00000005928.2,
chr1	269912309	269975028	+	exon	ENSSSCT00000005928.2,
chr1	270169722	270237597	+	intergenic_region	n/a
chr1	270170108	270237597	+	intergenic_region	n/a
chr1	270188281	270237597	+	intron	ENSSSCT00000005931.2,
chr1	270188319	270237597	+	intron	ENSSSCT00000005931.2,
chr1	270329795	270336118	+	exon	ENSSSCT00000005931.2,
chr1	270329795	270347874	+	exon	ENSSSCT00000005931.2,
chr1	270329795	270354137	+	exon	ENSSSCT00000005931.2,
chr1	270329795	270368801	+	exon	ENSSSCT00000005931.2,
chr1	270329811	270347874	+	exon	ENSSSCT00000005931.2,
chr1	270332459	270347874	+	exon	ENSSSCT00000005931.2,
chr1	270342348	270354137	+	exon	ENSSSCT00000005931.2,
chr1	270471815	270473150	-	exon	ENSSSCT00000005932.2,
chr1	270471815	270476354	-	exon	ENSSSCT00000005932.2,
chr1	270602784	270619968	+	exon	ENSSSCT00000005934.2,
chr1	270602784	270641008	+	exon	ENSSSCT00000005934.2,
chr1	270870003	270872251	-	intergenic_region	n/a
chr1	270870003	270879323	-	intergenic_region	n/a
chr1	270870003	270884554	-	intergenic_region	n/a
chr1	270870003	270911076	-	intergenic_region	n/a
chr1	271010284	271032721	+	intergenic_region	n/a
chr1	275800353	275806120	-	exon	ENSSSCT00000005966.2,
chr1	276557775	276565315	+	exon	ENSSSCT00000005970.2,
chr1	276557775	276691357	+	exon	ENSSSCT00000005970.2,
chr1	276560955	276565315	+	exon	ENSSSCT00000005970.2,
chr1	278917340	278922241	+	exon	ENSSSCT00000005980.2,
chr1	278917340	278927376	+	exon	ENSSSCT00000005980.2,
chr1	278917340	278936634	+	exon	ENSSSCT00000005980.2,
chr1	278917340	278939621	+	exon	ENSSSCT00000005980.2,
chr1	278920982	278927376	+	exon	ENSSSCT00000005980.2,
chr1	278927321	278939621	+	exon	ENSSSCT00000005980.2,
chr1	278933588	278936634	+	exon	ENSSSCT00000005980.2,
chr1	278933588	278939621	+	exon	ENSSSCT00000005980.2,
chr1	280460698	280462665	+	exon	ENSSSCT00000005985.2,
chr1	280482957	280497683	+	exon	ENSSSCT00000005985.2,
chr1	280497623	280502159	+	exon	ENSSSCT00000005985.2,
chr1	280497623	280505832	+	exon	ENSSSCT00000005985.2,
chr1	280627976	280635728	-	exon	ENSSSCT00000005988.2,
chr1	280627976	280656034	-	exon	ENSSSCT00000005988.2,
chr1	280627976	280700379	-	exon	ENSSSCT00000005988.2,
chr1	280648787	280649184	-	exon	ENSSSCT00000005988.2,
chr1	280648787	280663228	-	exon	ENSSSCT00000005988.2,
chr1	280648787	280666318	-	exon	ENSSSCT00000005988.2,
chr1	280648787	280668925	-	exon	ENSSSCT00000005988.2,
chr1	280648787	280700379	-	exon	ENSSSCT00000005988.2,
chr1	280648787	280701515	-	intron	ENSSSCT00000005988.2,
chr1	280698630	280701515	-	intron	ENSSSCT00000005988.2,
chr1	281586888	281674110	-	intron	ENSSSCT00000005995.2,
chr1	281712176	281719052	+	exon	ENSSSCT00000005995.2,
chr1	281729287	281729982	+	exon	ENSSSCT00000005995.2,
chr1	282166095	282195982	-	exon	ENSSSCT00000006000.2,
chr1	282416588	282559011	-	intergenic_region	n/a
chr1	283062055	283100341	-	exon	ENSSSCT00000006004.2,
chr1	283064415	283064891	-	exon	ENSSSCT00000006004.2,
chr1	283077826	283083205	-	exon	ENSSSCT00000006004.2,
chr1	283089950	283091675	-	exon	ENSSSCT00000006004.2,
chr1	283089950	283099286	-	exon	ENSSSCT00000006004.2,
chr1	283093377	283100341	-	exon	ENSSSCT00000006004.2,
chr1	283102747	283111472	-	exon	ENSSSCT00000006004.2,
chr1	283102747	283114748	-	exon	ENSSSCT00000006004.2,
chr1	283106349	283111472	-	exon	ENSSSCT00000006004.2,
chr1	283108168	283114748	-	exon	ENSSSCT00000006004.2,
chr1	283726156	283729707	-	exon	ENSSSCT00000006011.2,
chr1	283781181	283786252	-	exon	ENSSSCT00000006012.2,
chr1	283798123	283800217	-	exon	ENSSSCT00000006012.2,
chr1	283798123	283841933	-	intergenic_region	n/a
chr1	283810273	283841933	-	intergenic_region	n/a
chr1	283819938	283841933	-	intergenic_region	n/a
chr1	283824374	283841933	-	intergenic_region	n/a
chr1	283916128	283917980	+	exon	ENSSSCT00000006013.2,
chr1	283916128	283923677	+	exon	ENSSSCT00000006013.2,
chr1	283917882	283931595	+	exon	ENSSSCT00000006013.2,
chr1	283964284	283975748	+	exon	ENSSSCT00000006013.2,ENSSSCT00000034705.1,ENSSSCT00000034384.1,
chr1	284320474	284322778	+	exon	ENSSSCT00000006017.2,
chr1	284320474	284341604	+	exon	ENSSSCT00000006017.2,
chr1	284320474	284354583	+	exon	ENSSSCT00000006017.2,
chr1	284448584	284509515	-	intergenic_region	n/a
chr1	284655396	284656522	-	exon	ENSSSCT00000024664.1,
chr1	284708509	284711123	-	exon	ENSSSCT00000028609.1,
chr1	286228472	286233200	-	exon	ENSSSCT00000006038.2,
chr1	292570821	292572926	+	exon	ENSSSCT00000030006.1,
chr1	292685679	292705673	-	exon	ENSSSCT00000025473.1,
chr1	292960364	292961439	+	exon	ENSSSCT00000006057.2,
chr1	293285640	293325414	+	intergenic_region	n/a
chr1	293488318	293489817	+	exon	ENSSSCT00000006064.1,
chr1	293488318	293491745	+	intron	ENSSSCT00000006064.1,
chr1	293488318	293492639	+	exon	ENSSSCT00000006064.1,
chr1	293488318	293497055	+	exon	ENSSSCT00000006064.1,
chr1	293511501	293517866	-	exon	ENSSSCT00000006067.2,
chr1	294080186	294080333	-	intergenic_region	n/a
chr1	294080186	294102001	-	intergenic_region	n/a
chr1	294364783	294372794	+	intergenic_region	n/a
chr1	297328417	297409578	+	intergenic_region	n/a
chr1	297336189	297366899	+	exon	ENSSSCT00000024937.1,
chr1	297336189	297372240	+	exon	ENSSSCT00000024937.1,
chr1	297336189	297409578	+	intergenic_region	n/a
chr1	297457504	297458286	+	exon	ENSSSCT00000023452.1,
chr1	297466978	297468840	+	exon	ENSSSCT00000023452.1,
chr1	297494257	297560957	-	intergenic_region	n/a
chr1	297519814	297560957	-	exon	ENSSSCT00000006135.2,
chr1	297536723	297539752	-	exon	ENSSSCT00000006135.2,
chr1	297536723	297551935	-	exon	ENSSSCT00000006135.2,
chr1	297546084	297551935	-	intron	ENSSSCT00000006135.2,
chr1	297741969	297927572	+	intergenic_region	n/a
chr1	297882991	298029257	+	intergenic_region	n/a
chr1	299496321	299503947	-	exon	ENSSSCT00000006155.2,
chr1	299554717	299558723	-	exon	ENSSSCT00000006156.2,
chr1	299677410	299680822	-	exon	ENSSSCT00000006157.2,
chr1	299775403	299796766	+	exon	ENSSSCT00000006160.2,
chr1	299796549	299801634	+	exon	ENSSSCT00000006160.2,
chr1	299797832	299801634	+	exon	ENSSSCT00000006160.2,
chr1	299799482	299820449	+	exon	ENSSSCT00000006160.2,
chr1	299801167	299801634	+	exon	ENSSSCT00000006160.2,
chr1	299807814	299813040	+	exon	ENSSSCT00000006160.2,
chr1	299815881	299820449	+	exon	ENSSSCT00000006160.2,
chr1	299974420	299978323	+	intron	ENSSSCT00000006160.2,ENSSSCT00000029476.1,
chr1	300110070	300142568	-	intergenic_region	n/a
chr1	300126112	300142568	-	intergenic_region	n/a
chr1	300126112	300151730	-	intergenic_region	n/a
chr1	300139455	300142568	-	exon	ENSSSCT00000027058.1,
chr1	300139455	300151730	-	intron	ENSSSCT00000027058.1,
chr1	301441603	301445225	+	exon	ENSSSCT00000006165.2,
chr1	301441603	301461510	+	exon	ENSSSCT00000006165.2,
chr1	301515256	301535195	+	exon	ENSSSCT00000006165.2,
chr1	302994251	303001108	+	exon	ENSSSCT00000006217.2,
chr1	303161201	303162347	+	exon	ENSSSCT00000006223.2,
chr1	303196493	303198696	-	intron	ENSSSCT00000006226.2,
chr1	303196524	303198696	-	exon	ENSSSCT00000006226.2,
chr1	303289220	303304043	+	exon	ENSSSCT00000006230.2,
chr1	304255027	304257454	+	intergenic_region	n/a
chr1	304797554	304798876	+	exon	ENSSSCT00000006275.2,
chr1	304797554	304807179	+	exon	ENSSSCT00000006275.2,
chr1	304797554	304820843	+	exon	ENSSSCT00000006275.2,
chr1	304822634	304823214	+	exon	ENSSSCT00000006275.2,
chr1	305135147	305136269	+	exon	ENSSSCT00000036174.1,ENSSSCT00000006280.2,
chr1	305174205	305175146	+	exon	ENSSSCT00000006280.2,
chr1	305377277	305392639	+	exon	ENSSSCT00000006285.2,
chr1	306160944	306197451	-	exon	ENSSSCT00000006294.2,
chr1	306171665	306172674	-	exon	ENSSSCT00000006294.2,
chr1	306181496	306197451	-	exon	ENSSSCT00000006294.2,
chr1	306182168	306197451	-	exon	ENSSSCT00000006294.2,
chr1	306183314	306197451	-	exon	ENSSSCT00000006294.2,
chr1	306219172	306224018	-	exon	ENSSSCT00000006294.2,
chr1	306460466	306471579	-	exon	ENSSSCT00000006300.2,
chr1	306822439	306934873	-	intergenic_region	n/a
chr1	306897791	306900170	+	intron	ENSSSCT00000006310.2,
chr1	306987792	306988734	-	exon	ENSSSCT00000028732.1,
chr1	307315009	307320696	-	exon	ENSSSCT00000006315.2,
chr1	307316479	307320696	-	exon	ENSSSCT00000006315.2,
chr1	310128560	310134929	+	intron	ENSSSCT00000006353.2,
chr1	311287304	311347236	-	intergenic_region	n/a
chr1	311343239	311347236	-	intergenic_region	n/a
chr1	311409469	311413611	+	intergenic_region	n/a
chr1	311422004	311466666	-	intergenic_region	n/a
chr1	311558220	311694687	+	intergenic_region	n/a
chr1	313897101	313897773	+	intergenic_region	n/a
chr10	92171	97801	+	exon	ENSSSCT00000011813.2,
chr10	92171	107547	+	exon	ENSSSCT00000011813.2,
chr10	177153	178895	+	exon	ENSSSCT00000011815.2,
chr10	241981	253691	+	exon	ENSSSCT00000011815.2,
chr10	2279240	2287065	-	exon	ENSSSCT00000011817.2,
chr10	2279240	2302077	-	exon	ENSSSCT00000011817.2,
chr10	2342778	2355944	+	exon	ENSSSCT00000011818.2,
chr10	2370360	2413285	+	intron	ENSSSCT00000011818.2,
chr10	7611088	7741573	+	intergenic_region	n/a
chr10	7613084	7741573	+	intergenic_region	n/a
chr10	7613084	7761381	+	intergenic_region	n/a
chr10	8710093	8823165	-	intergenic_region	n/a
chr10	8822750	8823165	-	intergenic_region	n/a
chr10	9216363	9217140	-	intergenic_region	n/a
chr10	9216617	9217140	-	intergenic_region	n/a
chr10	9667997	9674820	+	intron	ENSSSCT00000025633.1,
chr10	9709752	9731216	-	exon	ENSSSCT00000025633.1,
chr10	10312706	10318322	+	exon	ENSSSCT00000024386.1,
chr10	10393261	10394373	-	intron	ENSSSCT00000011833.2,
chr10	11033710	11060621	+	exon	ENSSSCT00000011834.2,
chr10	11668104	11696196	-	exon	ENSSSCT00000011838.2,
chr10	11687662	11696196	-	exon	ENSSSCT00000011838.2,
chr10	11694054	11696196	-	exon	ENSSSCT00000011838.2,
chr10	11705431	11717419	-	exon	ENSSSCT00000011838.2,
chr10	11749223	11753848	+	intron	ENSSSCT00000011840.2,
chr10	11772748	11773401	+	exon	ENSSSCT00000011841.2,
chr10	11927976	11928472	+	exon	ENSSSCT00000011842.2,
chr10	12062635	12097159	-	exon	ENSSSCT00000011843.2,
chr10	12266445	12266672	-	exon	ENSSSCT00000011844.2,
chr10	12274354	12275844	-	exon	ENSSSCT00000011844.2,
chr10	12274354	12281080	-	exon	ENSSSCT00000011844.2,
chr10	12274354	12370142	-	intergenic_region	n/a
chr10	12274354	12376328	-	intergenic_region	n/a
chr10	12275682	12281080	-	exon	ENSSSCT00000011844.2,
chr10	12825482	12929568	-	intergenic_region	n/a
chr10	13453971	13455936	-	exon	ENSSSCT00000011851.2,
chr10	13581422	13582223	+	intron	ENSSSCT00000011852.2,
chr10	13600749	13605870	-	exon	ENSSSCT00000011854.2,
chr10	13600749	13614140	-	exon	ENSSSCT00000011854.2,
chr10	13605364	13614140	-	exon	ENSSSCT00000011854.2,
chr10	13908855	13949677	+	intergenic_region	n/a
chr10	14043448	14048586	-	intergenic_region	n/a
chr10	14306330	14307467	-	exon	ENSSSCT00000011860.2,
chr10	14854489	14865032	-	exon	ENSSSCT00000030683.1,
chr10	14994890	14998261	+	intergenic_region	n/a
chr10	15032847	15040118	+	exon	ENSSSCT00000027577.1,
chr10	15048938	15049680	+	exon	ENSSSCT00000025010.1,
chr10	15144799	15161291	-	exon	ENSSSCT00000011871.2,
chr10	16256296	16292113	-	exon	ENSSSCT00000011872.2,
chr10	16280794	16292113	-	exon	ENSSSCT00000011872.2,
chr10	16612452	16613757	-	exon	ENSSSCT00000028077.1,
chr10	16935202	17112829	+	intron	ENSSSCT00000011884.2,
chr10	16939299	16978389	-	exon	ENSSSCT00000011884.2,
chr10	16947860	16978389	-	exon	ENSSSCT00000011884.2,
chr10	16978306	17000982	-	exon	ENSSSCT00000011884.2,
chr10	17067380	17073695	-	exon	ENSSSCT00000011884.2,
chr10	17067380	17075630	-	exon	ENSSSCT00000011884.2,
chr10	17094866	17098568	+	intron	ENSSSCT00000011884.2,
chr10	17369643	17371825	+	intergenic_region	n/a
chr10	17369643	17375485	+	intergenic_region	n/a
chr10	17369643	17381911	+	intergenic_region	n/a
chr10	17369643	17385212	+	intergenic_region	n/a
chr10	17369643	17394947	+	intergenic_region	n/a
chr10	17369643	17404240	+	intergenic_region	n/a
chr10	17371572	17380026	+	exon	ENSSSCT00000011885.2,
chr10	17402178	17404240	+	exon	ENSSSCT00000011885.2,
chr10	17413837	17414423	+	exon	ENSSSCT00000011885.2,
chr10	17493388	17497480	+	intergenic_region	n/a
chr10	17555075	17570093	-	exon	ENSSSCT00000011888.2,
chr10	17594928	17609793	-	intergenic_region	n/a
chr10	17976426	18124093	+	exon	ENSSSCT00000011894.2,
chr10	17976426	18140410	+	exon	ENSSSCT00000011894.2,
chr10	17976426	18149975	+	exon	ENSSSCT00000011894.2,
chr10	17976426	18168555	+	exon	ENSSSCT00000011894.2,
chr10	18101700	18124093	+	exon	ENSSSCT00000011894.2,ENSSSCT00000035590.1,ENSSSCT00000033298.1,
chr10	18101700	18149975	+	exon	ENSSSCT00000011894.2,ENSSSCT00000035590.1,ENSSSCT00000033298.1,
chr10	18101700	18168555	+	exon	ENSSSCT00000011894.2,ENSSSCT00000035590.1,ENSSSCT00000033298.1,
chr10	18149844	18187909	+	exon	ENSSSCT00000011894.2,ENSSSCT00000035590.1,ENSSSCT00000033298.1,
chr10	18187787	18219757	+	exon	ENSSSCT00000011894.2,ENSSSCT00000035590.1,ENSSSCT00000033298.1,
chr10	18361726	18364302	-	exon	ENSSSCT00000028157.1,
chr10	18525333	18681007	-	intergenic_region	n/a
chr10	19710729	19712741	-	exon	ENSSSCT00000011898.2,
chr10	19923823	19926325	+	exon	ENSSSCT00000011900.2,
chr10	19934535	19935498	-	intergenic_region	n/a
chr10	19943997	19946705	-	intergenic_region	n/a
chr10	20972708	20987074	-	exon	ENSSSCT00000032490.1,
chr10	21572992	21748095	-	intergenic_region	n/a
chr10	21700951	21701379	-	intergenic_region	n/a
chr10	21700951	21726508	-	intergenic_region	n/a
chr10	21720567	21767729	-	intergenic_region	n/a
chr10	24005803	24061241	-	exon	ENSSSCT00000011916.2,
chr10	24035400	24061241	-	exon	ENSSSCT00000011916.2,
chr10	24480147	24486223	-	exon	ENSSSCT00000011919.2,
chr10	25171000	25193546	+	intron	ENSSSCT00000011926.2,
chr10	25171043	25193546	+	exon	ENSSSCT00000011926.2,
chr10	25176076	25193546	+	exon	ENSSSCT00000011926.2,
chr10	27770855	27783841	-	exon	ENSSSCT00000030669.1,
chr10	27783758	27792184	-	exon	ENSSSCT00000030669.1,
chr10	27824642	27824901	+	intergenic_region	n/a
chr10	28456990	28461339	+	intergenic_region	n/a
chr10	28931282	28971691	+	exon	ENSSSCT00000011956.2,
chr10	29267087	29271021	-	exon	ENSSSCT00000011962.1,
chr10	29268486	29269926	-	exon	ENSSSCT00000011962.1,
chr10	29268486	29273866	-	exon	ENSSSCT00000011962.1,
chr10	29321805	29325824	+	exon	ENSSSCT00000011960.2,
chr10	29321805	29333059	+	exon	ENSSSCT00000011960.2,
chr10	29324824	29325824	+	exon	ENSSSCT00000011960.2,
chr10	29336781	29339758	+	exon	ENSSSCT00000011960.2,
chr10	29339600	29344613	+	exon	ENSSSCT00000011960.2,
chr10	29339600	29346409	+	exon	ENSSSCT00000011960.2,
chr10	29339600	29351054	+	exon	ENSSSCT00000011960.2,
chr10	29339600	29352504	+	exon	ENSSSCT00000011960.2,
chr10	29340480	29351054	+	exon	ENSSSCT00000011960.2,
chr10	29342271	29344613	+	exon	ENSSSCT00000011960.2,
chr10	29342271	29346409	+	exon	ENSSSCT00000011960.2,
chr10	29342271	29351054	+	exon	ENSSSCT00000011960.2,
chr10	29342271	29360924	+	exon	ENSSSCT00000011960.2,
chr10	29342271	29364146	+	exon	ENSSSCT00000011960.2,
chr10	29350935	29352504	+	exon	ENSSSCT00000011960.2,
chr10	29531220	29536990	+	exon	ENSSSCT00000011966.2,
chr10	29567935	29615958	-	exon	ENSSSCT00000030381.1,
chr10	29576396	29580744	-	exon	ENSSSCT00000030381.1,
chr10	29898685	30031437	+	intergenic_region	n/a
chr10	29900373	30031437	+	intergenic_region	n/a
chr10	30361792	30434042	-	intergenic_region	n/a
chr10	30396527	30411370	-	exon	ENSSSCT00000011974.2,
chr10	30396527	30428646	-	exon	ENSSSCT00000011974.2,
chr10	30396527	30428690	-	exon	ENSSSCT00000011974.2,
chr10	30396527	30434042	-	exon	ENSSSCT00000011974.2,
chr10	31342999	31364339	-	intergenic_region	n/a
chr10	31451602	31474683	-	intergenic_region	n/a
chr10	31473583	31509707	-	intergenic_region	n/a
chr10	31844844	31857832	+	exon	ENSSSCT00000011982.2,
chr10	31848401	31855746	+	exon	ENSSSCT00000011982.2,
chr10	31848401	31864019	+	exon	ENSSSCT00000011982.2,
chr10	33047631	33057782	+	exon	ENSSSCT00000034755.1,ENSSSCT00000035632.1,ENSSSCT00000011987.2,
chr10	33050271	33057782	+	exon	ENSSSCT00000034755.1,ENSSSCT00000035632.1,ENSSSCT00000011987.2,
chr10	33071613	33078465	+	exon	ENSSSCT00000034755.1,ENSSSCT00000035632.1,ENSSSCT00000011987.2,
chr10	33080414	33081598	+	exon	ENSSSCT00000034755.1,ENSSSCT00000035632.1,ENSSSCT00000011987.2,
chr10	33268605	33279892	-	exon	ENSSSCT00000011992.2,
chr10	33271094	33278954	-	exon	ENSSSCT00000011992.2,
chr10	33271895	33273790	-	exon	ENSSSCT00000011992.2,
chr10	33278776	33319767	-	exon	ENSSSCT00000011992.2,
chr10	33646093	33649475	+	exon	ENSSSCT00000011993.2,
chr10	34185291	34313540	+	intergenic_region	n/a
chr10	34300295	34313540	+	exon	ENSSSCT00000011996.2,
chr10	35096153	35160373	-	intergenic_region	n/a
chr10	35240929	35244709	+	intergenic_region	n/a
chr10	35240929	35263088	+	intergenic_region	n/a
chr10	35240929	35264523	+	intergenic_region	n/a
chr10	35244566	35263088	+	exon	ENSSSCT00000025872.1,
chr10	35254557	35263088	+	exon	ENSSSCT00000025872.1,
chr10	35254557	35289091	+	exon	ENSSSCT00000025872.1,
chr10	35288939	35302453	+	exon	ENSSSCT00000025872.1,
chr10	35302352	35312084	+	exon	ENSSSCT00000025872.1,
chr10	35382114	35384249	+	exon	ENSSSCT00000027988.1,
chr10	35717098	35835067	+	intergenic_region	n/a
chr10	35747877	35755595	+	exon	ENSSSCT00000011999.2,
chr10	36282980	36284614	-	exon	ENSSSCT00000033903.1,ENSSSCT00000032984.1,ENSSSCT00000035745.1,ENSSSCT00000033663.1,ENSSSCT00000012005.2,ENSSSCT00000034248.1,ENSSSCT00000032780.1,
chr10	36413897	36436760	+	intergenic_region	n/a
chr10	36414580	36437146	-	intergenic_region	n/a
chr10	37017761	37036465	+	exon	ENSSSCT00000022956.1,
chr10	37017761	37044410	+	exon	ENSSSCT00000022956.1,
chr10	37117371	37123936	-	intron	ENSSSCT00000012026.2,
chr10	37117371	37127451	-	intron	ENSSSCT00000012026.2,
chr10	37117371	37131391	-	intron	ENSSSCT00000012026.2,
chr10	37117371	37146225	-	intergenic_region	n/a
chr10	37120502	37123936	-	exon	ENSSSCT00000012026.2,
chr10	37120502	37131391	-	exon	ENSSSCT00000012026.2,
chr10	37123723	37131391	-	exon	ENSSSCT00000012026.2,
chr10	37123723	37146225	-	intergenic_region	n/a
chr10	37127268	37135961	-	exon	ENSSSCT00000012026.2,
chr10	37127268	37146225	-	intergenic_region	n/a
chr10	37135909	37146225	-	intergenic_region	n/a
chr10	37142979	37146225	-	intergenic_region	n/a
chr10	37334322	37336086	-	intergenic_region	n/a
chr10	37404530	37449957	-	intergenic_region	n/a
chr10	37409164	37473029	-	intergenic_region	n/a
chr10	37411679	37473029	-	intergenic_region	n/a
chr10	37465102	37465502	-	intergenic_region	n/a
chr10	37465102	37470957	-	intergenic_region	n/a
chr10	37468947	37470957	-	intergenic_region	n/a
chr10	37486613	37488301	+	exon	ENSSSCT00000012037.2,
chr10	37486613	37494346	+	exon	ENSSSCT00000012037.2,
chr10	37486613	37495924	+	exon	ENSSSCT00000012037.2,
chr10	37747971	37837047	+	intron	ENSSSCT00000012043.1,
chr10	37797097	37800179	+	intron	ENSSSCT00000012043.1,
chr10	44171899	44178913	+	exon	ENSSSCT00000024775.1,ENSSSCT00000012055.2,
chr10	44171899	44183763	+	exon	ENSSSCT00000012055.2,
chr10	45220144	45222738	+	exon	ENSSSCT00000012060.2,
chr10	45679446	45783374	-	intergenic_region	n/a
chr10	45755013	45760381	-	intergenic_region	n/a
chr10	45755013	45783374	-	intergenic_region	n/a
chr10	45894630	45900402	-	exon	ENSSSCT00000012064.2,ENSSSCT00000012066.2,
chr10	45899659	45923578	-	exon	ENSSSCT00000012064.2,ENSSSCT00000012066.2,
chr10	45903856	45905902	-	exon	ENSSSCT00000012064.2,ENSSSCT00000012066.2,
chr10	45903856	45909727	-	exon	ENSSSCT00000012064.2,ENSSSCT00000012066.2,
chr10	45905499	45905902	-	exon	ENSSSCT00000012064.2,ENSSSCT00000012066.2,
chr10	45908068	45909727	-	exon	ENSSSCT00000012064.2,ENSSSCT00000012066.2,
chr10	45908068	45912041	-	exon	ENSSSCT00000012064.2,ENSSSCT00000012066.2,
chr10	45911869	45917713	-	exon	ENSSSCT00000012064.2,ENSSSCT00000012066.2,
chr10	45911869	45958805	-	exon	ENSSSCT00000012064.2,
chr10	45915306	45923578	-	exon	ENSSSCT00000012064.2,ENSSSCT00000012066.2,
chr10	45923431	45937059	-	exon	ENSSSCT00000012064.2,ENSSSCT00000012066.2,
chr10	45936930	45953269	-	exon	ENSSSCT00000012064.2,ENSSSCT00000012066.2,
chr10	45936930	45958805	-	exon	ENSSSCT00000012064.2,
chr10	45955321	45958805	-	exon	ENSSSCT00000012064.2,
chr10	45979341	45984194	-	exon	ENSSSCT00000012064.2,ENSSSCT00000012066.2,
chr10	45979341	45996745	-	exon	ENSSSCT00000012064.2,ENSSSCT00000012066.2,
chr10	45979341	46000278	-	exon	ENSSSCT00000012066.2,ENSSSCT00000012064.2,
chr10	46134653	46143041	-	intergenic_region	n/a
chr10	46273271	46290641	+	intergenic_region	n/a
chr10	46284389	46290641	+	intergenic_region	n/a
chr10	46596019	46597817	+	intron	ENSSSCT00000035562.1,
chr10	46596019	46613689	+	intron	ENSSSCT00000035562.1,
chr10	46596019	46615828	+	intron	ENSSSCT00000035562.1,
chr10	46596019	46681760	+	intron	ENSSSCT00000035562.1,
chr10	46596019	46779066	+	intron	ENSSSCT00000035562.1,
chr10	46597662	46613689	+	intron	ENSSSCT00000035562.1,
chr10	46597662	46619628	+	intron	ENSSSCT00000035562.1,
chr10	46597662	46681760	+	intron	ENSSSCT00000035562.1,
chr10	46597662	46720028	+	intron	ENSSSCT00000035562.1,
chr10	46597662	46726806	+	intron	ENSSSCT00000035562.1,
chr10	46597662	46779066	+	intron	ENSSSCT00000035562.1,
chr10	46597688	46613689	+	intron	ENSSSCT00000035562.1,
chr10	46597688	46779066	+	intron	ENSSSCT00000035562.1,
chr10	46597762	46613689	+	intron	ENSSSCT00000035562.1,
chr10	46597762	46681760	+	intron	ENSSSCT00000035562.1,
chr10	46613551	46681760	+	intron	ENSSSCT00000035562.1,
chr10	46681560	46720028	+	exon	ENSSSCT00000035562.1,
chr10	46681560	46779066	+	exon	ENSSSCT00000035562.1,
chr10	46711919	46720028	+	exon	ENSSSCT00000012067.2,
chr10	46711919	46779066	+	exon	ENSSSCT00000012067.2,
chr10	46726604	46779066	+	exon	ENSSSCT00000012067.2,ENSSSCT00000035562.1,
chr10	47064149	47075999	-	exon	ENSSSCT00000012068.2,
chr10	47064149	47086534	-	exon	ENSSSCT00000012068.2,
chr10	47064149	47092284	-	intron	ENSSSCT00000012068.2,
chr10	47086473	47106567	-	exon	ENSSSCT00000012068.2,
chr10	47093752	47106567	-	exon	ENSSSCT00000012068.2,
chr10	47097358	47106567	-	exon	ENSSSCT00000012068.2,
chr10	47148477	47151494	-	exon	ENSSSCT00000012068.2,
chr10	47242802	47243323	-	exon	ENSSSCT00000012069.2,
chr10	47245359	47247257	-	exon	ENSSSCT00000012069.2,
chr10	47265021	47265519	-	exon	ENSSSCT00000012069.2,
chr10	47266666	47268314	-	exon	ENSSSCT00000012069.2,
chr10	47448975	47451592	-	exon	ENSSSCT00000012070.2,
chr10	47710065	47712384	+	intergenic_region	n/a
chr10	48125462	48157052	-	intergenic_region	n/a
chr10	48594328	48609985	-	intergenic_region	n/a
chr10	48594522	48609985	-	intergenic_region	n/a
chr10	48598735	48609985	-	intergenic_region	n/a
chr10	48609499	48609985	-	exon	ENSSSCT00000012078.2,
chr10	48867912	48907174	+	exon	ENSSSCT00000012082.2,
chr10	49568556	49571722	+	exon	ENSSSCT00000012084.2,
chr10	49621863	49628502	-	intergenic_region	n/a
chr10	49667206	49673847	-	exon	ENSSSCT00000012085.2,
chr10	49672328	49673847	-	exon	ENSSSCT00000012085.2,
chr10	50688302	50702358	+	exon	ENSSSCT00000012089.2,
chr10	50688302	50717769	+	exon	ENSSSCT00000012089.2,
chr10	50688302	50723087	+	exon	ENSSSCT00000012089.2,
chr10	50688302	50742685	+	exon	ENSSSCT00000012089.2,
chr10	50698422	50702358	+	exon	ENSSSCT00000012089.2,
chr10	50698422	50717769	+	exon	ENSSSCT00000012089.2,
chr10	50698422	50742685	+	exon	ENSSSCT00000012089.2,
chr10	50947369	50966766	+	exon	ENSSSCT00000012090.2,
chr10	51236326	51267368	+	exon	ENSSSCT00000012091.2,
chr10	51578404	51586857	+	exon	ENSSSCT00000012093.1,
chr10	51713150	51716167	+	intergenic_region	n/a
chr10	51713150	51716241	+	intergenic_region	n/a
chr10	52858481	52860179	+	exon	ENSSSCT00000024330.1,
chr10	52907541	52911598	+	intergenic_region	n/a
chr10	52907541	52911602	+	intergenic_region	n/a
chr10	53682211	53743854	+	intergenic_region	n/a
chr10	53856831	53863094	+	exon	ENSSSCT00000024844.1,
chr10	54023860	54031658	+	exon	ENSSSCT00000012110.2,
chr10	54023860	54041621	+	exon	ENSSSCT00000012110.2,
chr10	54046151	54053071	+	exon	ENSSSCT00000012110.2,
chr10	54048970	54053071	+	exon	ENSSSCT00000012110.2,
chr10	54048970	54054083	+	exon	ENSSSCT00000012110.2,
chr10	54048970	54059121	+	exon	ENSSSCT00000012110.2,
chr10	54052939	54054083	+	exon	ENSSSCT00000012110.2,
chr10	54052939	54059121	+	exon	ENSSSCT00000012110.2,
chr10	54054021	54062038	+	exon	ENSSSCT00000012110.2,
chr10	54055539	54058085	+	exon	ENSSSCT00000012110.2,
chr10	54056902	54058085	+	exon	ENSSSCT00000012110.2,
chr10	54056902	54062038	+	exon	ENSSSCT00000012110.2,
chr10	54125708	54136715	-	exon	ENSSSCT00000012112.2,
chr10	54175856	54179891	+	exon	ENSSSCT00000012109.2,
chr10	54179586	54179891	+	exon	ENSSSCT00000012109.2,
chr10	54207896	54213906	-	exon	ENSSSCT00000012108.2,
chr10	54209843	54213906	-	exon	ENSSSCT00000012108.2,
chr10	54218225	54223208	-	exon	ENSSSCT00000012108.2,
chr10	54381760	54398312	+	exon	ENSSSCT00000028862.1,
chr10	54438706	54443934	+	exon	ENSSSCT00000012105.2,
chr10	54455236	54458661	+	intron	ENSSSCT00000012105.2,
chr10	54455321	54458661	+	intron	ENSSSCT00000012105.2,
chr10	55772042	55808258	+	intergenic_region	n/a
chr10	55803599	55808258	+	exon	ENSSSCT00000012116.2,
chr10	56077005	56083293	+	exon	ENSSSCT00000029464.1,ENSSSCT00000028075.1,ENSSSCT00000012118.2,
chr10	56116139	56117374	+	exon	ENSSSCT00000012118.2,ENSSSCT00000029464.1,ENSSSCT00000028075.1,
chr10	56116139	56118632	+	exon	ENSSSCT00000012118.2,ENSSSCT00000029464.1,ENSSSCT00000028075.1,
chr10	56118543	56120611	+	exon	ENSSSCT00000029464.1,ENSSSCT00000028075.1,ENSSSCT00000012118.2,
chr10	56592594	56675627	-	intergenic_region	n/a
chr10	57994109	58011719	+	exon	ENSSSCT00000012126.2,ENSSSCT00000012125.2,
chr10	58751706	58766266	-	exon	ENSSSCT00000012132.2,
chr10	58751706	58798980	-	exon	ENSSSCT00000012132.2,
chr10	58798085	58861115	-	exon	ENSSSCT00000012132.2,
chr10	58798085	58912493	-	exon	ENSSSCT00000012132.2,
chr10	58870241	58912493	-	intron	ENSSSCT00000012132.2,
chr10	58881715	58909767	-	exon	ENSSSCT00000012132.2,
chr10	58881715	58912493	-	exon	ENSSSCT00000012132.2,
chr10	58907402	58912493	-	exon	ENSSSCT00000012132.2,
chr10	59554486	59564783	+	intergenic_region	n/a
chr10	59564631	59609785	+	intergenic_region	n/a
chr10	61464369	61470083	-	exon	ENSSSCT00000012148.2,ENSSSCT00000035813.1,ENSSSCT00000033219.1,
chr10	62681670	62681909	-	intergenic_region	n/a
chr10	62681670	62692414	-	intergenic_region	n/a
chr10	62681670	62722387	-	intergenic_region	n/a
chr10	62692304	62738784	-	exon	ENSSSCT00000012150.2,
chr10	62738557	62748747	-	exon	ENSSSCT00000012150.2,
chr10	62738557	62755695	-	exon	ENSSSCT00000012150.2,
chr10	62738557	62767160	-	exon	ENSSSCT00000012150.2,
chr10	62745171	62767160	-	exon	ENSSSCT00000012150.2,
chr10	62755545	62767160	-	exon	ENSSSCT00000012150.2,
chr10	62765488	62789150	-	exon	ENSSSCT00000012150.2,
chr10	62781970	62805834	-	exon	ENSSSCT00000012150.2,
chr10	62803459	62805834	-	exon	ENSSSCT00000012150.2,
chr10	62803459	62833102	-	intron	ENSSSCT00000012150.2,
chr10	62803459	62839160	-	exon	ENSSSCT00000012150.2,
chr10	63252929	63365702	+	intergenic_region	n/a
chr10	63257104	63365702	+	intergenic_region	n/a
chr10	63270507	63271373	+	exon	ENSSSCT00000012151.2,
chr10	63281102	63288239	+	exon	ENSSSCT00000012151.2,
chr10	63471347	63475346	+	exon	ENSSSCT00000012153.2,ENSSSCT00000036002.1,ENSSSCT00000033626.1,ENSSSCT00000036398.1,ENSSSCT00000035114.1,
chr10	66473871	66556005	-	intergenic_region	n/a
chr10	69978850	69991661	+	intergenic_region	n/a
chr10	69987507	69991661	+	exon	ENSSSCT00000012182.1,
chr10	70563887	70597089	+	exon	ENSSSCT00000012183.2,
chr10	70642449	70654551	-	intron	ENSSSCT00000012183.2,
chr10	70838787	70941400	+	intergenic_region	n/a
chr10	71290208	71304382	+	exon	ENSSSCT00000012189.2,
chr10	71290208	71307626	+	exon	ENSSSCT00000012189.2,
chr10	71294817	71307626	+	exon	ENSSSCT00000012189.2,
chr10	71303539	71307626	+	exon	ENSSSCT00000012189.2,
chr10	71359304	71361661	-	intergenic_region	n/a
chr10	71361138	71361661	-	intergenic_region	n/a
chr10	73581212	73713062	-	intergenic_region	n/a
chr10	75648814	75674446	+	intergenic_region	n/a
chr10	75673703	75674446	+	exon	ENSSSCT00000012224.2,
chr10	75674306	75691485	+	exon	ENSSSCT00000012224.2,
chr10	75687658	75691485	+	exon	ENSSSCT00000012224.2,
chr10	75691382	75695212	+	exon	ENSSSCT00000012224.2,
chr10	76033749	76035507	+	exon	ENSSSCT00000012225.2,
chr10	76033749	76044859	+	exon	ENSSSCT00000012225.2,
chr10	76035340	76089926	+	exon	ENSSSCT00000012225.2,
chr10	76044749	76089926	+	exon	ENSSSCT00000012225.2,
chr10	76119639	76121463	-	intergenic_region	n/a
chr10	76119639	76135209	-	intergenic_region	n/a
chr10	76245922	76306111	-	exon	ENSSSCT00000012228.2,
chr10	76247584	76253521	-	exon	ENSSSCT00000012228.2,
chr10	76272294	76306111	-	exon	ENSSSCT00000012228.2,
chr10	76283712	76306111	-	exon	ENSSSCT00000012228.2,
chr10	76594070	76639629	-	intergenic_region	n/a
chr10	77000880	77001883	+	exon	ENSSSCT00000012233.2,
chr10	77158227	77160941	-	exon	ENSSSCT00000029810.1,
chr10	77572815	77622440	-	intergenic_region	n/a
chr10	77690752	77720129	-	exon	ENSSSCT00000023307.1,
chr10	77696541	77705048	-	exon	ENSSSCT00000023307.1,
chr10	77698486	77709139	-	exon	ENSSSCT00000023307.1,
chr11	114927	116545	-	exon	ENSSSCT00000010151.2,
chr11	244344	253640	-	exon	ENSSSCT00000010159.2,
chr11	250979	253640	-	exon	ENSSSCT00000010159.2,
chr11	266572	267124	-	exon	ENSSSCT00000010159.2,
chr11	266572	282312	-	intron	ENSSSCT00000010159.2,
chr11	266572	288907	-	exon	ENSSSCT00000010159.2,
chr11	320232	326828	-	exon	ENSSSCT00000031907.1,
chr11	320232	328992	-	exon	ENSSSCT00000031907.1,
chr11	466843	502116	-	exon	ENSSSCT00000022702.1,
chr11	472454	495629	-	exon	ENSSSCT00000022702.1,
chr11	472454	513694	-	exon	ENSSSCT00000022702.1,
chr11	486346	513694	-	intron	ENSSSCT00000022702.1,
chr11	495509	508754	-	exon	ENSSSCT00000022702.1,
chr11	495509	513694	-	exon	ENSSSCT00000022702.1,
chr11	501996	513694	-	exon	ENSSSCT00000022702.1,
chr11	501996	551063	-	intergenic_region	n/a
chr11	1483999	1621832	+	intergenic_region	n/a
chr11	1636082	1645963	+	exon	ENSSSCT00000010165.2,
chr11	1725475	1727765	+	intergenic_region	n/a
chr11	2098052	2101796	-	exon	ENSSSCT00000010177.2,
chr11	2121496	2127679	-	intergenic_region	n/a
chr11	2275318	2277558	-	intergenic_region	n/a
chr11	2496398	2524958	-	intergenic_region	n/a
chr11	3530481	3544747	+	exon	ENSSSCT00000029736.1,ENSSSCT00000010186.2,
chr11	3585232	3587787	-	intron	ENSSSCT00000010186.2,
chr11	3766438	3774119	+	exon	ENSSSCT00000025224.1,ENSSSCT00000010188.2,
chr11	4032787	4048067	-	exon	ENSSSCT00000010190.2,
chr11	4032787	4070420	-	exon	ENSSSCT00000010190.2,
chr11	4038375	4048067	-	exon	ENSSSCT00000010190.2,
chr11	4057924	4070420	-	exon	ENSSSCT00000010190.2,
chr11	4199895	4200150	+	exon	ENSSSCT00000010191.2,
chr11	5189667	5193917	+	exon	ENSSSCT00000010210.2,
chr11	5189667	5210814	+	exon	ENSSSCT00000010210.2,
chr11	5189667	5233354	+	exon	ENSSSCT00000010210.2,
chr11	5210653	5267612	+	exon	ENSSSCT00000010210.2,
chr11	5210653	5274850	+	exon	ENSSSCT00000010210.2,
chr11	5210653	5280553	+	exon	ENSSSCT00000010210.2,
chr11	5263855	5267612	+	exon	ENSSSCT00000010210.2,
chr11	5263855	5274850	+	exon	ENSSSCT00000010210.2,
chr11	5263855	5288837	+	exon	ENSSSCT00000010210.2,
chr11	5274152	5288837	+	exon	ENSSSCT00000010210.2,
chr11	5274155	5288837	+	exon	ENSSSCT00000010210.2,
chr11	5450626	5455362	-	intron	ENSSSCT00000010212.2,
chr11	5454621	5455362	-	exon	ENSSSCT00000010212.2,
chr11	6317578	6350185	+	exon	ENSSSCT00000010217.2,
chr11	6345844	6350185	+	exon	ENSSSCT00000010217.2,
chr11	6772276	6781125	-	exon	ENSSSCT00000010220.2,
chr11	6772276	6803923	-	exon	ENSSSCT00000010220.2,
chr11	6780496	6781125	-	exon	ENSSSCT00000010220.2,
chr11	6780496	6803923	-	exon	ENSSSCT00000010220.2,
chr11	7808774	7822810	+	exon	ENSSSCT00000010230.2,
chr11	7809616	7822810	+	exon	ENSSSCT00000010230.2,
chr11	8441512	8447008	-	exon	ENSSSCT00000010234.2,
chr11	8551724	8562768	+	exon	ENSSSCT00000010233.2,
chr11	8572054	8574435	+	exon	ENSSSCT00000010233.2,
chr11	8604783	8605920	+	intergenic_region	n/a
chr11	8607752	8623393	+	intergenic_region	n/a
chr11	8728917	8737268	+	exon	ENSSSCT00000010243.2,
chr11	8770514	8772126	+	intergenic_region	n/a
chr11	9467314	9507889	-	intergenic_region	n/a
chr11	9478613	9507889	-	intergenic_region	n/a
chr11	9504246	9507889	-	intergenic_region	n/a
chr11	11212642	11217519	+	exon	ENSSSCT00000027784.1,
chr11	11212642	11236804	+	exon	ENSSSCT00000027784.1,
chr11	11217082	11236804	+	exon	ENSSSCT00000027784.1,
chr11	11217082	11315888	+	intergenic_region	n/a
chr11	11217116	11236804	+	exon	ENSSSCT00000027784.1,
chr11	11344497	11385864	+	intergenic_region	n/a
chr11	11662613	11750175	-	intergenic_region	n/a
chr11	12096497	12096843	-	intergenic_region	n/a
chr11	12312481	12318821	+	exon	ENSSSCT00000023160.1,
chr11	12807920	12811939	-	intergenic_region	n/a
chr11	12807920	12827332	-	intergenic_region	n/a
chr11	12807920	12827335	-	intergenic_region	n/a
chr11	12807920	12827511	-	intergenic_region	n/a
chr11	12820435	12823730	-	exon	ENSSSCT00000010256.2,
chr11	13221205	13237532	+	intergenic_region	n/a
chr11	13305769	13324616	-	exon	ENSSSCT00000010259.2,
chr11	14212237	14277417	+	intergenic_region	n/a
chr11	14263348	14299032	-	intron	ENSSSCT00000010264.2,
chr11	14292148	14305774	-	intron	ENSSSCT00000010264.2,
chr11	14710083	14813304	-	intergenic_region	n/a
chr11	14714358	14835206	+	exon	ENSSSCT00000010266.2,
chr11	15976293	15979955	+	intron	ENSSSCT00000010273.2,
chr11	15977687	15983336	+	exon	ENSSSCT00000010273.2,
chr11	15977687	15985150	+	exon	ENSSSCT00000010273.2,
chr11	15977687	15993129	+	exon	ENSSSCT00000010273.2,
chr11	15979885	15984307	+	exon	ENSSSCT00000010273.2,
chr11	15992153	15995322	+	exon	ENSSSCT00000010273.2,
chr11	16154643	16165084	+	intron	ENSSSCT00000010277.2,
chr11	16913376	17013395	+	intergenic_region	n/a
chr11	16936884	16937617	+	exon	ENSSSCT00000028001.1,
chr11	17971238	17977141	-	intergenic_region	n/a
chr11	18192822	18202692	+	exon	ENSSSCT00000010289.2,
chr11	18208851	18216961	+	intergenic_region	n/a
chr11	18208851	18353856	+	intergenic_region	n/a
chr11	18288836	18289151	-	exon	ENSSSCT00000030501.1,
chr11	18571298	18580399	-	exon	ENSSSCT00000010294.2,
chr11	18571298	18599085	-	exon	ENSSSCT00000010294.2,
chr11	18571298	18605445	-	intergenic_region	n/a
chr11	18575614	18584327	-	exon	ENSSSCT00000010294.2,
chr11	18581458	18589861	-	exon	ENSSSCT00000010294.2,
chr11	18628807	18676841	+	exon	ENSSSCT00000010296.2,
chr11	18665770	18676841	+	exon	ENSSSCT00000010296.2,
chr11	18975972	18979956	+	exon	ENSSSCT00000026092.1,
chr11	19591297	19596472	+	intergenic_region	n/a
chr11	19591313	19596472	+	intergenic_region	n/a
chr11	19661652	19666444	-	exon	ENSSSCT00000010300.2,
chr11	19661652	19736732	-	exon	ENSSSCT00000010300.2,
chr11	19712163	19715514	-	exon	ENSSSCT00000010300.2,
chr11	19712163	19718631	-	exon	ENSSSCT00000010300.2,
chr11	19712163	19723353	-	exon	ENSSSCT00000010300.2,
chr11	19712163	19736732	-	exon	ENSSSCT00000010300.2,
chr11	19715398	19726605	-	exon	ENSSSCT00000010300.2,
chr11	19715398	19736732	-	exon	ENSSSCT00000010300.2,
chr11	19718544	19726605	-	exon	ENSSSCT00000010300.2,
chr11	19718544	19732756	-	exon	ENSSSCT00000010300.2,
chr11	19718544	19736732	-	exon	ENSSSCT00000010300.2,
chr11	19722198	19736732	-	exon	ENSSSCT00000010300.2,
chr11	19803203	19851901	-	exon	ENSSSCT00000010302.2,
chr11	19805267	19851901	-	exon	ENSSSCT00000010302.2,
chr11	20075966	20082683	+	exon	ENSSSCT00000010304.2,
chr11	20082238	20082683	+	exon	ENSSSCT00000010304.2,
chr11	20082238	20094879	+	exon	ENSSSCT00000010304.2,
chr11	20082238	20097845	+	exon	ENSSSCT00000010304.2,
chr11	20999137	21007581	+	exon	ENSSSCT00000010306.2,
chr11	21001197	21003912	+	exon	ENSSSCT00000010306.2,
chr11	21049875	21058972	-	exon	ENSSSCT00000010309.2,
chr11	21429243	21431377	+	exon	ENSSSCT00000010311.2,
chr11	21429243	21437155	+	exon	ENSSSCT00000010311.2,
chr11	21619709	21624044	-	intron	ENSSSCT00000010313.2,
chr11	21801948	21814210	+	exon	ENSSSCT00000010315.2,
chr11	22173482	22178095	+	intergenic_region	n/a
chr11	22173482	22181163	+	intergenic_region	n/a
chr11	22187578	22193534	+	exon	ENSSSCT00000025788.1,
chr11	22229047	22241327	-	intergenic_region	n/a
chr11	22240397	22243942	-	exon	ENSSSCT00000027352.1,
chr11	22240397	22243969	-	exon	ENSSSCT00000027352.1,
chr11	22240397	22243973	-	exon	ENSSSCT00000027352.1,
chr11	22240397	22249363	-	exon	ENSSSCT00000027352.1,
chr11	22243068	22243973	-	exon	ENSSSCT00000027352.1,
chr11	22243068	22249363	-	exon	ENSSSCT00000027352.1,
chr11	22377012	22380962	+	intergenic_region	n/a
chr11	22539619	22562591	-	exon	ENSSSCT00000010321.2,
chr11	22552052	22553042	-	exon	ENSSSCT00000010321.2,
chr11	22552052	22558158	-	exon	ENSSSCT00000010321.2,
chr11	22552052	22561505	-	exon	ENSSSCT00000010321.2,
chr11	22573414	22590869	+	exon	ENSSSCT00000010322.2,
chr11	22574569	22590869	+	exon	ENSSSCT00000010322.2,
chr11	22576598	22587328	+	exon	ENSSSCT00000010322.2,
chr11	22587236	22597989	+	exon	ENSSSCT00000010322.2,
chr11	22775075	22805996	-	intergenic_region	n/a
chr11	23622906	23650191	+	exon	ENSSSCT00000010331.2,ENSSSCT00000010330.2,
chr11	24183041	24207221	+	exon	ENSSSCT00000022928.1,
chr11	24236647	24279091	+	exon	ENSSSCT00000022928.1,
chr11	24688121	24760594	+	intergenic_region	n/a
chr11	24805989	24837421	+	intergenic_region	n/a
chr11	25434300	25441196	-	intergenic_region	n/a
chr11	25548977	25565533	-	exon	ENSSSCT00000010338.2,
chr11	25559256	25560191	-	exon	ENSSSCT00000010338.2,
chr11	25838572	25864166	+	exon	ENSSSCT00000026550.1,
chr11	25904563	25908902	+	exon	ENSSSCT00000026550.1,
chr11	25996123	26073707	+	intergenic_region	n/a
chr11	26002135	26073707	+	intergenic_region	n/a
chr11	26045913	26060951	-	exon	ENSSSCT00000023920.1,
chr11	26258633	26259466	-	intron	ENSSSCT00000010342.2,
chr11	26280706	26305046	-	exon	ENSSSCT00000010342.2,
chr11	26280706	26307201	-	exon	ENSSSCT00000010342.2,
chr11	26289490	26307201	-	intron	ENSSSCT00000010342.2,
chr11	26291064	26307201	-	exon	ENSSSCT00000010342.2,
chr11	26295949	26307201	-	exon	ENSSSCT00000010342.2,
chr11	26301535	26305046	-	exon	ENSSSCT00000010342.2,
chr11	26425715	26430206	+	exon	ENSSSCT00000010348.2,
chr11	32036344	32036709	+	exon	ENSSSCT00000010354.2,
chr11	34321681	34403017	+	intron	ENSSSCT00000025779.1,
chr11	35045323	35067542	+	exon	ENSSSCT00000010359.2,
chr11	35045323	35080039	+	exon	ENSSSCT00000010359.2,
chr11	48358890	48409967	-	exon	ENSSSCT00000010367.2,
chr11	49690381	49708915	-	intron	ENSSSCT00000025113.1,
chr11	52182965	52187127	-	exon	ENSSSCT00000010376.2,
chr11	52209155	52216641	+	exon	ENSSSCT00000010375.2,
chr11	52209155	52224225	+	exon	ENSSSCT00000010375.2,
chr11	52212325	52216641	+	exon	ENSSSCT00000010375.2,
chr11	52224093	52233558	+	exon	ENSSSCT00000010375.2,
chr11	52232763	52264401	+	exon	ENSSSCT00000010375.2,
chr11	52436220	52442994	+	exon	ENSSSCT00000010377.2,
chr11	52440550	52442994	+	exon	ENSSSCT00000010377.2,
chr11	52440550	52475583	+	exon	ENSSSCT00000010377.2,
chr11	52681980	52695433	+	intergenic_region	n/a
chr11	52681980	52788105	+	intergenic_region	n/a
chr11	52691991	52788105	+	intergenic_region	n/a
chr11	52691991	52790682	+	intergenic_region	n/a
chr11	52691991	52790875	+	intergenic_region	n/a
chr11	52691991	52790993	+	intergenic_region	n/a
chr11	52730346	52732689	-	intergenic_region	n/a
chr11	52733686	52773771	-	intergenic_region	n/a
chr11	53778989	53783624	-	intergenic_region	n/a
chr11	53822474	53826322	-	exon	ENSSSCT00000010386.2,
chr11	53888439	53891329	-	intron	ENSSSCT00000010386.2,
chr11	53900017	53901180	-	exon	ENSSSCT00000010386.2,
chr11	53945586	53946911	-	exon	ENSSSCT00000010386.2,
chr11	55451240	55462575	-	intron	ENSSSCT00000031188.1,
chr11	55451269	55462575	-	intron	ENSSSCT00000031188.1,
chr11	55451765	55459959	-	exon	ENSSSCT00000031188.1,
chr11	55451765	55462575	-	exon	ENSSSCT00000031188.1,
chr11	56099855	56127735	-	exon	ENSSSCT00000010394.2,
chr11	56114607	56117666	-	exon	ENSSSCT00000028357.1,ENSSSCT00000010394.2,
chr11	56114607	56126645	-	exon	ENSSSCT00000028357.1,ENSSSCT00000010394.2,
chr11	56125252	56146474	-	exon	ENSSSCT00000010394.2,
chr11	56140966	56142114	-	exon	ENSSSCT00000028357.1,ENSSSCT00000010394.2,
chr11	56140966	56146474	-	exon	ENSSSCT00000028357.1,
chr11	56142026	56146474	-	exon	ENSSSCT00000028357.1,
chr11	56283465	56283630	+	exon	ENSSSCT00000010395.2,
chr11	56283465	56286876	+	exon	ENSSSCT00000010395.2,
chr11	56283465	56292661	+	exon	ENSSSCT00000010395.2,
chr11	56283465	56303570	+	exon	ENSSSCT00000010395.2,
chr11	56283465	56306768	+	intergenic_region	n/a
chr11	56292568	56303570	+	exon	ENSSSCT00000010395.2,
chr11	56292568	56306768	+	intergenic_region	n/a
chr11	68669483	68669641	+	intergenic_region	n/a
chr11	69873672	69877067	+	exon	ENSSSCT00000010407.2,
chr11	69873672	69878264	+	exon	ENSSSCT00000010407.2,
chr11	69873672	69880966	+	exon	ENSSSCT00000010407.2,
chr11	70152479	70179198	+	exon	ENSSSCT00000032528.1,
chr11	70434369	70440107	-	exon	ENSSSCT00000010412.2,
chr11	72044108	72050082	-	exon	ENSSSCT00000010418.2,
chr11	72371861	72396926	-	exon	ENSSSCT00000010419.2,
chr11	73511911	73512686	+	intergenic_region	n/a
chr11	73765041	73788022	-	intergenic_region	n/a
chr11	74714006	74761877	-	intergenic_region	n/a
chr11	75001213	75016218	-	exon	ENSSSCT00000027258.1,
chr11	75032498	75061013	-	exon	ENSSSCT00000027258.1,
chr11	75110052	75132336	-	exon	ENSSSCT00000027258.1,
chr11	75129058	75132336	-	exon	ENSSSCT00000027258.1,
chr11	75407183	75415240	+	exon	ENSSSCT00000010434.2,
chr11	75498858	75584138	-	intergenic_region	n/a
chr11	76193953	76202790	+	exon	ENSSSCT00000029789.1,
chr11	76367637	76375761	+	intron	ENSSSCT00000010440.2,
chr11	76373396	76401491	+	intergenic_region	n/a
chr11	76375686	76401491	+	intergenic_region	n/a
chr11	78309337	78313497	+	exon	ENSSSCT00000010446.2,
chr11	78454972	78461818	+	intron	ENSSSCT00000010450.2,ENSSSCT00000026999.1,
chr11	78454972	78517825	+	intergenic_region	n/a
chr11	78454972	78532771	+	intergenic_region	n/a
chr11	81567206	81586734	-	exon	ENSSSCT00000010453.2,
chr11	81586451	81586734	-	exon	ENSSSCT00000010453.2,
chr11	83179761	83230229	-	intergenic_region	n/a
chr11	83229966	83295075	-	intergenic_region	n/a
chr11	83475287	83512486	+	exon	ENSSSCT00000010461.2,
chr11	83475287	83523969	+	exon	ENSSSCT00000010461.2,
chr11	83475287	83562646	+	exon	ENSSSCT00000010461.2,
chr11	84950637	84954039	+	exon	ENSSSCT00000010470.2,
chr11	84950637	84965034	+	exon	ENSSSCT00000010470.2,
chr11	84960155	84965034	+	exon	ENSSSCT00000010470.2,
chr11	84964946	84979400	+	exon	ENSSSCT00000010470.2,
chr11	84964946	84986054	+	exon	ENSSSCT00000010470.2,
chr11	84964946	85088442	+	intergenic_region	n/a
chr11	85806646	85807575	+	exon	ENSSSCT00000010472.2,
chr11	85810873	85813906	+	exon	ENSSSCT00000010472.2,
chr11	86192190	86192510	+	exon	ENSSSCT00000010476.2,
chr11	86426859	86437276	-	exon	ENSSSCT00000028205.1,
chr11	86433245	86435074	-	intron	ENSSSCT00000028205.1,
chr11	86434906	86437276	-	exon	ENSSSCT00000028205.1,
chr11	86489885	86498893	+	intergenic_region	n/a
chr11	86869925	86879529	+	exon	ENSSSCT00000010491.2,
chr11	86933456	86962417	-	exon	ENSSSCT00000010490.2,
chr11	86933456	87015561	-	intergenic_region	n/a
chr11	86933456	87016420	-	intergenic_region	n/a
chr11	86942801	86955303	-	exon	ENSSSCT00000010490.2,
chr11	86942801	86962417	-	exon	ENSSSCT00000010490.2,
chr11	86951625	86955303	-	exon	ENSSSCT00000010490.2,
chr11	86951625	86962417	-	exon	ENSSSCT00000010490.2,
chr11	86955208	86962417	-	exon	ENSSSCT00000010490.2,
chr11	86962116	86962417	-	exon	ENSSSCT00000010490.2,
chr11	86983006	86987226	-	exon	ENSSSCT00000010489.2,
chr11	87003246	87004064	-	exon	ENSSSCT00000010489.2,
chr11	87126535	87130958	-	exon	ENSSSCT00000029020.1,
chr12	151796	157165	+	exon	ENSSSCT00000033863.1,ENSSSCT00000018643.3,
chr12	151796	164543	+	exon	ENSSSCT00000018643.3,
chr12	315609	323714	+	exon	ENSSSCT00000018654.2,
chr12	319532	323714	+	exon	ENSSSCT00000018654.2,
chr12	367331	390195	+	exon	ENSSSCT00000018654.2,
chr12	370578	390195	+	exon	ENSSSCT00000018654.2,
chr12	444014	447000	-	exon	ENSSSCT00000025124.1,
chr12	444014	457509	-	exon	ENSSSCT00000025124.1,
chr12	745794	746732	+	intergenic_region	n/a
chr12	992215	1032660	-	intergenic_region	n/a
chr12	992215	1038595	-	intergenic_region	n/a
chr12	996270	1038595	-	intergenic_region	n/a
chr12	1163687	1164055	+	exon	ENSSSCT00000025260.1,
chr12	1401699	1403815	+	exon	ENSSSCT00000031734.1,
chr12	1676102	1688312	-	exon	ENSSSCT00000018658.2,
chr12	1676102	1689070	-	exon	ENSSSCT00000018658.2,
chr12	1710265	1824098	-	intergenic_region	n/a
chr12	1710265	1824308	-	intergenic_region	n/a
chr12	1735134	1750329	+	exon	ENSSSCT00000030018.1,
chr12	2078866	2079591	-	exon	ENSSSCT00000018666.2,
chr12	2272008	2273277	+	exon	ENSSSCT00000018679.2,
chr12	3324833	3329332	+	intron	ENSSSCT00000018688.2,
chr12	3353922	3354790	+	intergenic_region	n/a
chr12	3360599	3374584	+	exon	ENSSSCT00000018689.2,
chr12	3452757	3456934	+	exon	ENSSSCT00000018691.2,
chr12	4070865	4071506	-	exon	ENSSSCT00000018692.2,
chr12	4199663	4203570	-	exon	ENSSSCT00000018693.2,
chr12	4631315	4637765	-	exon	ENSSSCT00000022358.1,
chr12	4644826	4649314	-	exon	ENSSSCT00000022358.1,
chr12	4804161	4805931	+	exon	ENSSSCT00000018702.2,
chr12	5055877	5067513	+	exon	ENSSSCT00000018709.2,
chr12	5063509	5067513	+	exon	ENSSSCT00000018709.2,
chr12	5188918	5189874	+	exon	ENSSSCT00000018711.3,
chr12	5189459	5201519	+	intron	ENSSSCT00000018711.3,
chr12	5193200	5194267	+	exon	ENSSSCT00000018711.3,
chr12	5244044	5247215	+	exon	ENSSSCT00000018715.2,
chr12	5475167	5477978	-	exon	ENSSSCT00000018723.2,
chr12	5476779	5477978	-	exon	ENSSSCT00000018723.2,
chr12	5682560	5683742	+	exon	ENSSSCT00000025315.1,
chr12	6057442	6060253	-	exon	ENSSSCT00000018732.2,
chr12	6060091	6064077	-	exon	ENSSSCT00000018732.2,
chr12	6111691	6113595	+	exon	ENSSSCT00000018738.2,
chr12	7872827	7875923	+	exon	ENSSSCT00000018773.2,
chr12	7990373	8001002	-	exon	ENSSSCT00000027741.1,ENSSSCT00000018775.2,
chr12	11441895	11483250	-	exon	ENSSSCT00000033236.1,
chr12	11441895	11488014	-	exon	ENSSSCT00000018784.2,
chr12	11456322	11483250	-	exon	ENSSSCT00000033236.1,ENSSSCT00000018784.2,
chr12	11461813	11466613	-	exon	ENSSSCT00000033236.1,ENSSSCT00000018784.2,
chr12	11461813	11483250	-	exon	ENSSSCT00000033236.1,ENSSSCT00000018784.2,
chr12	11466494	11483250	-	exon	ENSSSCT00000033236.1,ENSSSCT00000018784.2,
chr12	11470995	11483250	-	exon	ENSSSCT00000033236.1,ENSSSCT00000018784.2,
chr12	11476585	11483250	-	exon	ENSSSCT00000033236.1,ENSSSCT00000018784.2,
chr12	11653109	11656884	+	intergenic_region	n/a
chr12	12135663	12137409	-	exon	ENSSSCT00000018788.2,
chr12	12135663	12138895	-	exon	ENSSSCT00000018788.2,
chr12	12135663	12138898	-	exon	ENSSSCT00000018788.2,
chr12	12187479	12189977	+	exon	ENSSSCT00000018789.2,
chr12	12189808	12207651	+	exon	ENSSSCT00000018789.2,
chr12	12203546	12207651	+	exon	ENSSSCT00000018789.2,
chr12	12368345	12368753	-	exon	ENSSSCT00000018793.2,
chr12	12749163	12804024	-	intergenic_region	n/a
chr12	12797259	12962192	-	intergenic_region	n/a
chr12	12925740	12962192	-	intergenic_region	n/a
chr12	12945763	12962192	-	intergenic_region	n/a
chr12	13030858	13036271	+	intron	ENSSSCT00000027357.1,
chr12	13078736	13099785	+	exon	ENSSSCT00000027357.1,
chr12	13573401	13574976	+	exon	ENSSSCT00000018798.2,
chr12	13573401	13580901	+	exon	ENSSSCT00000018798.2,
chr12	13955863	14019513	-	exon	ENSSSCT00000018802.2,
chr12	14242194	14284284	+	exon	ENSSSCT00000018804.2,
chr12	14508500	14516384	+	intergenic_region	n/a
chr12	14530678	14537553	+	intergenic_region	n/a
chr12	14559615	14560842	+	intergenic_region	n/a
chr12	14679564	14679839	+	exon	ENSSSCT00000018809.3,
chr12	14691671	14701912	+	exon	ENSSSCT00000018809.3,ENSSSCT00000035113.1,ENSSSCT00000033305.1,
chr12	14691671	14711533	+	exon	ENSSSCT00000018809.3,ENSSSCT00000035113.1,ENSSSCT00000033305.1,ENSSSCT00000033315.1,
chr12	14819804	14823072	+	exon	ENSSSCT00000018810.2,
chr12	15115560	15140996	-	intergenic_region	n/a
chr12	15161872	15165512	+	intron	ENSSSCT00000030857.1,
chr12	15242028	15256459	-	exon	ENSSSCT00000033901.1,
chr12	15256360	15275808	-	exon	ENSSSCT00000033901.1,
chr12	15273975	15275808	-	intron	ENSSSCT00000033901.1,
chr12	15557534	15617981	-	exon	ENSSSCT00000018832.2,
chr12	16030982	16046573	-	exon	ENSSSCT00000018837.2,
chr12	16030982	16063733	-	exon	ENSSSCT00000018837.2,
chr12	16036543	16049593	-	exon	ENSSSCT00000018837.2,
chr12	16036543	16063733	-	exon	ENSSSCT00000018837.2,
chr12	16046492	16054013	-	exon	ENSSSCT00000018837.2,
chr12	16046492	16063733	-	exon	ENSSSCT00000018837.2,
chr12	16046492	16071225	-	exon	ENSSSCT00000018837.2,
chr12	16048530	16063733	-	exon	ENSSSCT00000018837.2,
chr12	16053861	16063733	-	exon	ENSSSCT00000018837.2,
chr12	16053861	16071225	-	exon	ENSSSCT00000018837.2,
chr12	16053861	16085519	-	exon	ENSSSCT00000018837.2,
chr12	16062482	16071225	-	exon	ENSSSCT00000018837.2,
chr12	16062482	16085519	-	exon	ENSSSCT00000018837.2,
chr12	16069709	16071225	-	exon	ENSSSCT00000018837.2,
chr12	16085352	16101827	-	exon	ENSSSCT00000018837.2,
chr12	16098936	16101827	-	exon	ENSSSCT00000018837.2,
chr12	16187562	16194567	+	exon	ENSSSCT00000018839.2,
chr12	16845381	16852434	+	exon	ENSSSCT00000018844.2,
chr12	16845381	16868014	+	exon	ENSSSCT00000018844.2,
chr12	16852309	16862575	+	exon	ENSSSCT00000018844.2,
chr12	16861242	16868014	+	exon	ENSSSCT00000018844.2,
chr12	16882081	16887367	+	exon	ENSSSCT00000018844.2,
chr12	16977581	16979444	+	intron	ENSSSCT00000018846.2,
chr12	16978073	16979444	+	exon	ENSSSCT00000018846.2,
chr12	17059096	17085916	+	exon	ENSSSCT00000018846.2,
chr12	17069503	17085916	+	exon	ENSSSCT00000018846.2,
chr12	18188801	18192918	+	exon	ENSSSCT00000018861.2,
chr12	18455863	18458572	-	exon	ENSSSCT00000024903.1,ENSSSCT00000018869.2,
chr12	18570378	18575036	-	exon	ENSSSCT00000018875.2,
chr12	18731949	18736767	+	exon	ENSSSCT00000018882.2,
chr12	18731949	18740531	+	exon	ENSSSCT00000018882.2,
chr12	18752194	18752784	+	exon	ENSSSCT00000018882.2,
chr12	18788148	18790985	+	intergenic_region	n/a
chr12	19072621	19138843	-	intergenic_region	n/a
chr12	19128236	19138843	-	exon	ENSSSCT00000026388.1,
chr12	19366398	19367156	-	exon	ENSSSCT00000018905.2,
chr12	19466581	19506627	-	intergenic_region	n/a
chr12	19563984	19564642	-	intergenic_region	n/a
chr12	19868684	19869889	+	exon	ENSSSCT00000018917.2,
chr12	20075684	20078161	-	exon	ENSSSCT00000025436.1,
chr12	20097144	20108444	+	exon	ENSSSCT00000027389.1,
chr12	20118435	20120421	+	exon	ENSSSCT00000027389.1,
chr12	20308389	20319673	-	exon	ENSSSCT00000018921.2,
chr12	20310297	20319673	-	exon	ENSSSCT00000018921.2,
chr12	20310297	20319752	-	intron	ENSSSCT00000018927.2,ENSSSCT00000018921.2,
chr12	20316409	20319673	-	exon	ENSSSCT00000018921.2,
chr12	20322532	20327437	-	intron	ENSSSCT00000018927.2,
chr12	20387114	20430888	-	intergenic_region	n/a
chr12	20429896	20430888	-	exon	ENSSSCT00000018934.2,
chr12	20671170	20856416	+	intergenic_region	n/a
chr12	20698120	20842359	+	intergenic_region	n/a
chr12	20704130	20853326	+	intergenic_region	n/a
chr12	20807657	20856416	+	intergenic_region	n/a
chr12	20813114	20856416	+	intergenic_region	n/a
chr12	20847738	20848026	+	exon	ENSSSCT00000018948.2,
chr12	20847738	20848973	+	exon	ENSSSCT00000018948.2,
chr12	21029531	21030171	+	exon	ENSSSCT00000018963.2,
chr12	21029531	21038230	+	exon	ENSSSCT00000018963.2,
chr12	21074484	21077030	-	exon	ENSSSCT00000018959.2,
chr12	22321255	22323341	+	exon	ENSSSCT00000019023.2,
chr12	23241497	23249199	-	exon	ENSSSCT00000019057.2,
chr12	23265330	23266798	-	exon	ENSSSCT00000019057.2,
chr12	23302745	23308971	+	exon	ENSSSCT00000019058.2,
chr12	23393480	23401474	+	exon	ENSSSCT00000019059.2,
chr12	23393480	23405847	+	exon	ENSSSCT00000019059.2,
chr12	23395100	23405847	+	exon	ENSSSCT00000019059.2,
chr12	23496794	23500826	+	exon	ENSSSCT00000019063.2,
chr12	23559588	23560774	+	exon	ENSSSCT00000019064.2,
chr12	23561976	23575302	+	exon	ENSSSCT00000019064.2,
chr12	23727465	23729286	+	exon	ENSSSCT00000019067.2,
chr12	23727465	23732256	+	exon	ENSSSCT00000019067.2,
chr12	23727465	23750252	+	exon	ENSSSCT00000019067.2,
chr12	23729226	23739114	+	exon	ENSSSCT00000019067.2,
chr12	23736596	23743858	+	exon	ENSSSCT00000019067.2,
chr12	23750110	23751682	+	exon	ENSSSCT00000019067.2,
chr12	23797987	23800527	+	exon	ENSSSCT00000019068.2,
chr12	23985199	24076622	+	intergenic_region	n/a
chr12	24242431	24243253	+	exon	ENSSSCT00000019083.2,
chr12	25019975	25023025	+	exon	ENSSSCT00000019097.2,
chr12	25021891	25025161	+	exon	ENSSSCT00000019097.2,
chr12	25026657	25027161	+	exon	ENSSSCT00000019097.2,
chr12	25378090	25379986	+	exon	ENSSSCT00000024337.1,
chr12	25811579	25819835	-	exon	ENSSSCT00000030769.1,
chr12	26628108	26769452	-	intergenic_region	n/a
chr12	26630470	26630952	-	exon	ENSSSCT00000019129.1,
chr12	26640168	26722750	+	intergenic_region	n/a
chr12	26840115	26845587	+	intergenic_region	n/a
chr12	27128054	27129718	-	exon	ENSSSCT00000032384.1,ENSSSCT00000019115.2,
chr12	27207179	27310979	-	intergenic_region	n/a
chr12	27207179	27311177	-	intergenic_region	n/a
chr12	27366725	27380569	-	intergenic_region	n/a
chr12	27535585	27568015	-	exon	ENSSSCT00000019153.2,
chr12	27541665	27568015	-	exon	ENSSSCT00000019153.2,
chr12	27543194	27544241	-	exon	ENSSSCT00000019153.2,
chr12	27559138	27568015	-	exon	ENSSSCT00000019153.2,
chr12	27597385	27603058	+	exon	ENSSSCT00000019154.2,
chr12	27597385	27606771	+	exon	ENSSSCT00000019154.2,
chr12	27599876	27606771	+	exon	ENSSSCT00000019154.2,
chr12	27608857	27616955	+	exon	ENSSSCT00000019154.2,
chr12	31696118	31699978	+	exon	ENSSSCT00000019162.2,ENSSSCT00000031451.1,
chr12	31875147	31915569	-	exon	ENSSSCT00000026192.1,ENSSSCT00000019163.2,
chr12	32299469	32304905	+	intergenic_region	n/a
chr12	34514573	34601274	-	intergenic_region	n/a
chr12	34582927	34637547	-	intergenic_region	n/a
chr12	35282347	35283750	+	exon	ENSSSCT00000019188.2,
chr12	35282347	35285813	+	intergenic_region	n/a
chr12	35338611	35387319	-	intergenic_region	n/a
chr12	35849683	35861346	+	exon	ENSSSCT00000019208.2,ENSSSCT00000019209.2,
chr12	35849683	35877564	+	exon	ENSSSCT00000019208.2,ENSSSCT00000019209.2,
chr12	35930283	35933005	+	exon	ENSSSCT00000019208.2,ENSSSCT00000019209.2,
chr12	36509145	36510111	-	exon	ENSSSCT00000033129.1,ENSSSCT00000024586.1,
chr12	36516640	36544644	-	exon	ENSSSCT00000033129.1,ENSSSCT00000024586.1,
chr12	37094024	37102042	+	exon	ENSSSCT00000019213.2,
chr12	37135028	37138400	+	exon	ENSSSCT00000019212.2,
chr12	37137028	37138400	+	exon	ENSSSCT00000019212.2,
chr12	37146039	37162666	+	exon	ENSSSCT00000019212.2,
chr12	37227369	37235315	+	intron	ENSSSCT00000019232.3,
chr12	37228113	37231860	+	exon	ENSSSCT00000019232.3,
[truncated: 8,647 more rows]

## Sheet: D(find_circ)
Prediction of circRNA candidates from rRNA-depleted libraries by find_circ
[truncated: 38,294 more rows]

[truncated: 1 more sheets: E(MapSplice)]
