# Supplementary material for: Identification of circRNA-associated ceRNA networks using longissimus thoracis of pigs of different breeds and growth stages
Source: BMC Genomics. 2022 Apr 11;23:294. doi: 10.1186/s12864-022-08515-7 (PMC9004053; doi:10.1186/s12864-022-08515-7)
Supplement: Supplementary file 13 — Additional file 13. 12864_2022_8515_MOESM13_ESM.xlsx. [file 12864_2022_8515_MOESM13_ESM.xlsx]

## Sheet: Sheet1
Primers for RT-PCR and RT-qPCR
Gene	Primer type	Primer sequence (5 '- 3')	Product size (bp)
Divergent-circKANSL1L	Sense	AATGGAAGTGGCTTGTAGACAGAG	201
	Antisense	AAGCAGATACCCTTTGTTGCTG
Convergent-circKANSL1L	Sense	AAGGAGGCAACAACAAAGGG	148
	Antisense	GAGTCGGAAATCCCAGCAT
mmu-KANSL1L	Sense	AGTGAAGAGCCTTTACCAGAACAC	198
	Antisense	GGAAATGCCATTAGCCAGACATT
Full-circKANSL1L	Sense	cggGGTACCtgaaatatgctatcttacagGCTTCCAGTAATTATCTCCAG	1262
	Antisense	cgcGGATCCtcaagaaaaaatatattcacCTTAGAGGCACGAATCTGCC
RT-qPCR-circKANSL1L	Sense	AGTACTGAATGGAAGTGGCTTG	156
	Antisense	CTGGAGATAATTACTGGAAGCCTTAG
RT-qPCR-KANSL1L	Sense	CTTTGACTGTGGAGAGGGA	150
	Antisense	GCAGAAAGCCTGTGGTTAG
mmu-PCNA	Sense	TTTGAGGCACGCCTGATCC	135
	Antisense	GGAGACGTGAGACGAGTCCAT
mmu-CyclinD1	Sense	CTCCGTATCTTACTTCAAGTGCG	250
	Antisense	CTTCTCGGCAGTCAAGGGAA
mmu-CyclinE	Sense	GAGCTTGAATACCCCAGGACTG	246
	Antisense	CGTCTCTCTGTGGAGCTTATAGAC
mmu-MYF5	Sense	AGGCTGCTACTCTTGGCTCA	97
	Antisense	TGCCAGTTCTCCCCTTCTGA
mmu-MYOD1	Sense	GGCTACGACACCGCCTACTA	162
	Antisense	CGACTCTGGTGGTGCATCTG
mmu-MYOG	Sense	GCAATGCACTGGAGTTCG	94
	Antisense	ACGATGGACGTAAGGGAGTG
mmu-MyHC	Sense	CAAGTCATCGGTGTTTGTGG	158
	Antisense	TGTCGTACTTGGGCGGGTTC
mmu-MyHC I	Sense	TCCTGCGGAAGTCTGAGAAG	116
	Antisense	GACACGATCTTTGGCCTTGAC
mmu-MyHC IIb	Sense	ATCCGGGTTGAAGACTCTGG	169
	Antisense	GTGGGTGCTCTTCAAGTTGG
mmu-GAPDH	Sense	AGGTCGGTGTGAACGGATTTG	123
	Antisense	TGTAGACCATGTAGTTGAGGTCA
